# Supplementary material for: Demographics, perceptions, and socioeconomic factors affecting influenza vaccination among adults in the United States
Source: PeerJ. 2018 Jul 13;6:e5171. doi: 10.7717/peerj.5171 (PMC6047499; doi:10.7717/peerj.5171)
Supplement: Supplemental Information 1 — Raw survey data used in analysis. [file peerj-06-5171-s001.csv]

CaseID	ppagecat	PPEDUCAT	PPETHM	PPGENDER	PPINCIMP	PPMARIT	PPMSACAT	PPREG4	PPWORK	PPNET	Q13	Q14	Q15	Q16	Q17	Q18_1	Q18_2	Q18_3	Q18_4	Q18_5	Q18_6	Q18_7	Q18_8	Q18_9	Q18_10	Q18_11	Q18_otherText	Q19	Q20	Q21	weight
2	18-24	High school	White, Non-Hispanic	Female	$175,000 or more	Never married	Metro	Northeast	Not working - other	Yes	Yes, every year	Don_t know	No, no effect	No, no effect	Protect myself and others	#NULL!	#NULL!	#NULL!	#NULL!	#NULL!	#NULL!	#NULL!	#NULL!	#NULL!	#NULL!	#NULL!		Yes	Don_t know	Don_t know	1.3144
3	25-34	High school	2+ Races, Non-Hispanic	Male	$12,500 to $14,999	Divorced	Metro	Midwest	Not working - other	No	Refused	#NULL!	#NULL!	#NULL!	#NULL!	#NULL!	#NULL!	#NULL!	#NULL!	#NULL!	#NULL!	#NULL!	#NULL!	#NULL!	#NULL!	#NULL!		Refused	Refused	#NULL!	0.6384
4	45-54	Some college	White, Non-Hispanic	Female	$100,000 to $124,999	Married	Metro	Northeast	Working - as a paid employee	Yes	Yes, every year	$0	No, no effect	No, no effect	Protect myself and others	#NULL!	#NULL!	#NULL!	#NULL!	#NULL!	#NULL!	#NULL!	#NULL!	#NULL!	#NULL!	#NULL!		Yes	Very effective	Yes, the full cost is paid	0.8234
5	55-64	Bachelor_s degree or higher	White, Non-Hispanic	Male	$100,000 to $124,999	Married	Metro	West	Working - as a paid employee	Yes	Yes, some years	Less than $30	No, no effect	No, no effect	Protect myself	No	Yes	Yes	No	Yes	No	Yes	Yes	No	No	No		Yes	It varies from season to season	Yes, but only part of the cost is paid	0.6457
6	18-24	Bachelor_s degree or higher	White, Non-Hispanic	Male	$125,000 to $149,999	Married	Metro	Northeast	Working - as a paid employee	Yes	Yes, every year	$0	No, no effect	No, no effect	Protect myself and others	#NULL!	#NULL!	#NULL!	#NULL!	#NULL!	#NULL!	#NULL!	#NULL!	#NULL!	#NULL!	#NULL!		Yes	Somewhat effective	Don_t know	1.1649
7	25-34	Bachelor_s degree or higher	White, Non-Hispanic	Male	$50,000 to $59,999	Married	Non-Metro	Midwest	Not working - looking for work	No	Yes, some years	$0	No, no effect	No, no effect	Protect others	No	No	Yes	No	No	No	No	Yes	No	No	No		Yes	It varies from season to season	Yes, the full cost is paid	1.434
8	35-44	Some college	White, Non-Hispanic	Female	$100,000 to $124,999	Never married	Metro	South	Working - as a paid employee	Yes	No, never	#NULL!	#NULL!	#NULL!	#NULL!	No	No	No	No	Yes	No	No	No	No	No	No		Yes	Somewhat effective	Yes, the full cost is paid	1.1796
9	75+	Bachelor_s degree or higher	White, Non-Hispanic	Male	$175,000 or more	Married	Metro	Midwest	Not working - retired	Yes	Yes, every year	$0	No, no effect	No, no effect	Protect myself	#NULL!	#NULL!	#NULL!	#NULL!	#NULL!	#NULL!	#NULL!	#NULL!	#NULL!	#NULL!	#NULL!		Yes	Refused	Yes, the full cost is paid	0.6144
10	55-64	Some college	White, Non-Hispanic	Female	$150,000 to $174,999	Married	Metro	West	Working - self-employed	Yes	Yes, some years	$0	No, no effect	No, no effect	Protect myself and others	No	No	No	No	No	No	No	Yes	No	No	No		Yes	It varies from season to season	Yes, the full cost is paid	0.7632
11	45-54	High school	Hispanic	Male	$60,000 to $74,999	Never married	Metro	West	Working - as a paid employee	Yes	No, never	#NULL!	#NULL!	#NULL!	#NULL!	No	Yes	No	No	No	No	Yes	No	No	No	No		Yes	Somewhat effective	Yes, the full cost is paid	0.9214
12	55-64	High school	White, Non-Hispanic	Female	$15,000 to $19,999	Divorced	Non-Metro	South	Working - as a paid employee	No	No, never	#NULL!	#NULL!	#NULL!	#NULL!	No	No	No	No	No	No	No	No	No	Yes	No	I do NOT feel it has been researched enough.	Yes	Don_t know	Don_t know	1.0515
13	45-54	High school	Hispanic	Male	$25,000 to $29,999	Divorced	Non-Metro	Midwest	Working - as a paid employee	Yes	Yes, every year	$0	Yes, more likely	Yes, more likely	Protect myself and others	#NULL!	#NULL!	#NULL!	#NULL!	#NULL!	#NULL!	#NULL!	#NULL!	#NULL!	#NULL!	#NULL!		Yes	Somewhat effective	Yes, the full cost is paid	0.9541
14	25-34	Bachelor_s degree or higher	Other, Non-Hispanic	Male	$125,000 to $149,999	Living with partner	Metro	South	Working - as a paid employee	Yes	Yes, some years	Less than $30	Yes, more likely	No, less likely	Protect myself	No	No	No	No	No	No	No	Yes	No	No	No		Yes	Very effective	Yes, but only part of the cost is paid	2.1442
15	45-54	High school	White, Non-Hispanic	Male	$35,000 to $39,999	Never married	Metro	South	Working - as a paid employee	Yes	Yes, every year	Don_t know	Yes, more likely	No, no effect	Protect myself and others	#NULL!	#NULL!	#NULL!	#NULL!	#NULL!	#NULL!	#NULL!	#NULL!	#NULL!	#NULL!	#NULL!		Yes	Very effective	Yes, but only part of the cost is paid	0.7992
16	55-64	Some college	White, Non-Hispanic	Female	$175,000 or more	Separated	Metro	Midwest	Not working - retired	Yes	Yes, some years	$30 to $60	No, no effect	No, no effect	Protect myself	No	No	Yes	No	Yes	No	No	No	No	No	No		Yes	Somewhat effective	Don_t know	0.8783
17	65-74	Some college	White, Non-Hispanic	Male	$25,000 to $29,999	Married	Non-Metro	Midwest	Not working - retired	Yes	Yes, some years	$0	No, no effect	No, no effect	Protect myself	No	No	No	No	No	No	No	No	No	No	Yes		Yes	Don_t know	Yes, the full cost is paid	0.6143
18	25-34	High school	Black, Non-Hispanic	Male	Less than $5,000	Never married	Metro	Northeast	Not working - disabled	No	No, never	#NULL!	#NULL!	#NULL!	#NULL!	No	No	No	No	No	No	No	Yes	No	No	No		No	Don_t know	#NULL!	1.6417
19	35-44	Bachelor_s degree or higher	White, Non-Hispanic	Female	$60,000 to $74,999	Married	Metro	South	Working - as a paid employee	Yes	Yes, some years	Don_t know	No, no effect	No, no effect	Protect others	No	Yes	No	No	No	No	No	No	No	No	No		Yes	It varies from season to season	Yes, the full cost is paid	0.8733
20	25-34	Bachelor_s degree or higher	White, Non-Hispanic	Female	$100,000 to $124,999	Living with partner	Metro	Midwest	Working - as a paid employee	Yes	No, never	#NULL!	#NULL!	#NULL!	#NULL!	No	No	No	No	No	No	No	Yes	No	No	No		Yes	Don_t know	Don_t know	1.1482
21	45-54	Bachelor_s degree or higher	White, Non-Hispanic	Female	$175,000 or more	Never married	Metro	Northeast	Working - as a paid employee	Yes	No, never	#NULL!	#NULL!	#NULL!	#NULL!	No	No	No	No	No	No	Yes	Yes	No	No	No		Yes	Somewhat effective	Yes, the full cost is paid	0.6921
22	18-24	Bachelor_s degree or higher	White, Non-Hispanic	Female	$150,000 to $174,999	Never married	Metro	Midwest	Working - as a paid employee	Yes	Yes, some years	Less than $30	No, no effect	No, no effect	Protect myself	No	No	Yes	No	No	No	Yes	Yes	No	No	No		Yes	Somewhat effective	Don_t know	1.1482
23	65-74	Some college	Hispanic	Female	$15,000 to $19,999	Married	Metro	Northeast	Not working - retired	No	Yes, some years	$0	No, no effect	No, no effect	Protect myself	Yes	No	No	No	No	No	No	No	No	No	No		Yes	Don_t know	Don_t know	1.2232
24	18-24	Less than high school	White, Non-Hispanic	Male	$125,000 to $149,999	Never married	Metro	West	Not working - other	Yes	Yes, every year	$0	Yes, more likely	No, no effect	Protect myself	#NULL!	#NULL!	#NULL!	#NULL!	#NULL!	#NULL!	#NULL!	#NULL!	#NULL!	#NULL!	#NULL!		Yes	Very effective	Yes, the full cost is paid	1.9224
25	25-34	Bachelor_s degree or higher	White, Non-Hispanic	Female	$60,000 to $74,999	Married	Metro	Midwest	Working - as a paid employee	Yes	No, never	#NULL!	#NULL!	#NULL!	#NULL!	No	No	Yes	No	No	No	Yes	Yes	No	No	No		Yes	Don_t know	Don_t know	0.8694
26	35-44	Some college	White, Non-Hispanic	Female	$60,000 to $74,999	Married	Non-Metro	Midwest	Working - as a paid employee	Yes	Yes, every year	$0	Yes, more likely	No, no effect	Protect myself and others	#NULL!	#NULL!	#NULL!	#NULL!	#NULL!	#NULL!	#NULL!	#NULL!	#NULL!	#NULL!	#NULL!		Yes	Somewhat effective	Yes, the full cost is paid	0.9349
27	65-74	High school	White, Non-Hispanic	Female	$12,500 to $14,999	Divorced	Metro	South	Not working - retired	Yes	Yes, every year	$0	No, no effect	Yes, more likely	Protect myself and others	#NULL!	#NULL!	#NULL!	#NULL!	#NULL!	#NULL!	#NULL!	#NULL!	#NULL!	#NULL!	#NULL!		Yes	Somewhat effective	Yes, the full cost is paid	0.6992
28	65-74	Bachelor_s degree or higher	White, Non-Hispanic	Male	$60,000 to $74,999	Married	Metro	Northeast	Not working - retired	Yes	No, never	#NULL!	#NULL!	#NULL!	#NULL!	No	Yes	No	No	Yes	No	No	No	No	No	No		Yes	Not effective	Yes, the full cost is paid	0.5074
29	65-74	Bachelor_s degree or higher	White, Non-Hispanic	Female	$30,000 to $34,999	Divorced	Metro	Northeast	Not working - retired	Yes	No, never	#NULL!	#NULL!	#NULL!	#NULL!	No	No	Yes	No	No	No	No	No	No	No	No		Yes	Somewhat effective	Don_t know	0.6069
31	25-34	Less than high school	Hispanic	Female	$85,000 to $99,999	Married	Non-Metro	West	Not working - other	No	Refused	#NULL!	#NULL!	#NULL!	#NULL!	#NULL!	#NULL!	#NULL!	#NULL!	#NULL!	#NULL!	#NULL!	#NULL!	#NULL!	#NULL!	#NULL!		No	Not effective	#NULL!	2.5953
32	25-34	Bachelor_s degree or higher	2+ Races, Non-Hispanic	Male	$40,000 to $49,999	Living with partner	Metro	Northeast	Working - as a paid employee	Yes	Yes, every year	$0	No, no effect	No, no effect	Protect myself	#NULL!	#NULL!	#NULL!	#NULL!	#NULL!	#NULL!	#NULL!	#NULL!	#NULL!	#NULL!	#NULL!		Yes	It varies from season to season	Yes, the full cost is paid	0.3839
33	25-34	Less than high school	Hispanic	Male	$60,000 to $74,999	Widowed	Metro	Midwest	Working - self-employed	Yes	Refused	#NULL!	#NULL!	#NULL!	#NULL!	#NULL!	#NULL!	#NULL!	#NULL!	#NULL!	#NULL!	#NULL!	#NULL!	#NULL!	#NULL!	#NULL!		Refused	Refused	#NULL!	1.749
34	25-34	Bachelor_s degree or higher	Hispanic	Female	$60,000 to $74,999	Never married	Metro	South	Working - as a paid employee	Yes	No, never	#NULL!	#NULL!	#NULL!	#NULL!	No	No	No	No	Yes	No	No	No	No	No	No		Yes	Not effective	Yes, the full cost is paid	1.1588
35	45-54	Some college	White, Non-Hispanic	Female	$125,000 to $149,999	Married	Metro	West	Working - as a paid employee	Yes	No, never	#NULL!	#NULL!	#NULL!	#NULL!	No	No	No	No	No	No	No	No	No	Yes	No	never had one, never get sick	Yes	It varies from season to season	Yes, the full cost is paid	0.8093
36	25-34	Bachelor_s degree or higher	White, Non-Hispanic	Male	$75,000 to $84,999	Living with partner	Metro	Midwest	Working - as a paid employee	Yes	No, never	#NULL!	#NULL!	#NULL!	#NULL!	No	No	No	No	No	No	No	Yes	No	No	No		Yes	Very effective	Yes, the full cost is paid	1.2425
37	18-24	Some college	White, Non-Hispanic	Male	$50,000 to $59,999	Divorced	Metro	Northeast	Working - self-employed	Yes	No, never	#NULL!	#NULL!	#NULL!	#NULL!	No	Yes	Yes	No	Yes	No	Yes	Yes	No	No	No		Yes	It varies from season to season	Yes, the full cost is paid	1.2207
38	65-74	Less than high school	White, Non-Hispanic	Male	$30,000 to $34,999	Married	Metro	Midwest	Not working - retired	Yes	Yes, some years	$0	No, no effect	No, no effect	Protect myself and others	No	Yes	No	No	Yes	No	No	No	No	No	No		Yes	It varies from season to season	Yes, the full cost is paid	0.9593
39	35-44	Some college	White, Non-Hispanic	Female	$35,000 to $39,999	Divorced	Metro	West	Working - as a paid employee	Yes	Yes, every year	$0	No, no effect	No, no effect	Protect myself and others	#NULL!	#NULL!	#NULL!	#NULL!	#NULL!	#NULL!	#NULL!	#NULL!	#NULL!	#NULL!	#NULL!		Yes	Very effective	Yes, the full cost is paid	1.0061
40	45-54	Bachelor_s degree or higher	White, Non-Hispanic	Female	$125,000 to $149,999	Married	Metro	Midwest	Not working - looking for work	Yes	No, never	#NULL!	#NULL!	#NULL!	#NULL!	No	Yes	No	No	No	No	No	No	No	No	No		Yes	Somewhat effective	Don_t know	0.7383
41	45-54	Some college	White, Non-Hispanic	Male	$100,000 to $124,999	Married	Metro	Midwest	Working - self-employed	Yes	No, never	#NULL!	#NULL!	#NULL!	#NULL!	No	Yes	No	No	No	No	No	No	No	Yes	No	The vaccines contain animal products. I am vegan	Yes	It varies from season to season	Yes, but only part of the cost is paid	0.8337
42	35-44	Some college	Black, Non-Hispanic	Male	$85,000 to $99,999	Living with partner	Non-Metro	South	Not working - on temporary layoff from a job	Yes	Yes, some years	$30 to $60	No, less likely	No, less likely	Protect others	No	Yes	No	No	No	No	No	Yes	No	No	No		Yes	Somewhat effective	Yes, but only part of the cost is paid	1.4124
43	55-64	Bachelor_s degree or higher	Black, Non-Hispanic	Male	$100,000 to $124,999	Divorced	Metro	West	Working - as a paid employee	Yes	Yes, some years	$0	Yes, more likely	Yes, more likely	Protect myself and others	No	No	No	No	Yes	Yes	No	No	No	No	No		Yes	Somewhat effective	Yes, the full cost is paid	0.8753
44	65-74	Less than high school	White, Non-Hispanic	Female	Less than $5,000	Widowed	Metro	Midwest	Not working - disabled	Yes	No, never	#NULL!	#NULL!	#NULL!	#NULL!	No	No	No	No	No	No	No	No	No	Yes	No	do not take	Yes	Not effective	Yes, the full cost is paid	0.9573
45	35-44	High school	White, Non-Hispanic	Male	$60,000 to $74,999	Never married	Metro	Northeast	Not working - looking for work	Yes	Yes, some years	$0	No, no effect	Yes, more likely	Protect myself and others	No	Yes	Yes	No	Yes	Yes	No	No	No	No	No		Yes	Somewhat effective	Yes, the full cost is paid	0.8986
46	55-64	High school	White, Non-Hispanic	Female	$85,000 to $99,999	Married	Metro	West	Not working - retired	Yes	No, never	#NULL!	#NULL!	#NULL!	#NULL!	No	No	No	No	No	No	No	No	No	Yes	No	just don_t want it	Yes	It varies from season to season	Yes, the full cost is paid	0.7833
47	25-34	Bachelor_s degree or higher	White, Non-Hispanic	Male	$125,000 to $149,999	Married	Metro	South	Working - as a paid employee	Yes	No, never	#NULL!	#NULL!	#NULL!	#NULL!	No	Yes	Yes	No	No	No	No	Yes	No	No	No		Yes	Somewhat effective	Yes, the full cost is paid	1.2481
48	65-74	Bachelor_s degree or higher	White, Non-Hispanic	Female	$60,000 to $74,999	Married	Non-Metro	South	Not working - retired	Yes	Yes, every year	$0	No, no effect	No, no effect	Protect myself and others	#NULL!	#NULL!	#NULL!	#NULL!	#NULL!	#NULL!	#NULL!	#NULL!	#NULL!	#NULL!	#NULL!		Yes	Somewhat effective	Yes, the full cost is paid	0.6026
49	45-54	High school	White, Non-Hispanic	Female	$50,000 to $59,999	Married	Metro	Midwest	Working - self-employed	Yes	Yes, some years	Less than $30	No, no effect	No, no effect	Protect myself and others	No	Yes	No	No	No	No	No	No	No	No	No		Yes	It varies from season to season	Yes, the full cost is paid	0.794
50	75+	Bachelor_s degree or higher	White, Non-Hispanic	Male	$175,000 or more	Married	Metro	South	Not working - retired	Yes	No, never	#NULL!	#NULL!	#NULL!	#NULL!	No	Yes	Yes	No	No	No	No	No	No	No	No		Yes	Somewhat effective	Don_t know	0.6172
51	35-44	Bachelor_s degree or higher	White, Non-Hispanic	Male	$100,000 to $124,999	Married	Metro	Midwest	Working - as a paid employee	Yes	Yes, every year	$0	No, no effect	Yes, more likely	Protect myself and others	#NULL!	#NULL!	#NULL!	#NULL!	#NULL!	#NULL!	#NULL!	#NULL!	#NULL!	#NULL!	#NULL!		Yes	Somewhat effective	Yes, the full cost is paid	0.8913
52	25-34	Some college	White, Non-Hispanic	Male	$100,000 to $124,999	Married	Metro	West	Working - as a paid employee	Yes	Yes, some years	$0	No, no effect	No, no effect	Protect myself and others	No	Yes	No	No	Yes	No	No	No	No	No	No		Yes	Somewhat effective	Yes, the full cost is paid	0.977
53	55-64	Bachelor_s degree or higher	Hispanic	Male	$100,000 to $124,999	Divorced	Metro	Northeast	Working - self-employed	No	Yes, every year	$30 to $60	No, no effect	No, no effect	Protect myself	#NULL!	#NULL!	#NULL!	#NULL!	#NULL!	#NULL!	#NULL!	#NULL!	#NULL!	#NULL!	#NULL!		Yes	Very effective	No	1.2638
54	35-44	Bachelor_s degree or higher	2+ Races, Non-Hispanic	Male	$100,000 to $124,999	Married	Metro	West	Working - self-employed	Yes	No, never	#NULL!	#NULL!	#NULL!	#NULL!	No	No	Yes	No	No	No	No	Yes	No	No	No		Yes	Somewhat effective	Don_t know	0.2911
55	65-74	Bachelor_s degree or higher	White, Non-Hispanic	Male	$75,000 to $84,999	Married	Non-Metro	South	Working - as a paid employee	Yes	Yes, every year	Less than $30	No, no effect	No, no effect	Protect myself and others	#NULL!	#NULL!	#NULL!	#NULL!	#NULL!	#NULL!	#NULL!	#NULL!	#NULL!	#NULL!	#NULL!		Yes	Somewhat effective	Yes, but only part of the cost is paid	0.6038
56	65-74	Some college	Other, Non-Hispanic	Female	$100,000 to $124,999	Married	Metro	Midwest	Not working - retired	Yes	No, never	#NULL!	#NULL!	#NULL!	#NULL!	No	No	Yes	No	No	No	No	No	No	No	No		Yes	Don_t know	Don_t know	1.423
57	35-44	Bachelor_s degree or higher	White, Non-Hispanic	Female	$60,000 to $74,999	Divorced	Metro	South	Working - as a paid employee	Yes	Yes, some years	$0	Yes, more likely	No, no effect	Protect myself	No	No	No	No	No	No	Yes	Yes	No	Yes	No	By the time I remember to do so, I have flu-like symptoms	Yes	Somewhat effective	Yes, the full cost is paid	0.8733
58	55-64	Some college	White, Non-Hispanic	Female	$60,000 to $74,999	Married	Non-Metro	Midwest	Working - as a paid employee	Yes	Yes, every year	$0	No, no effect	No, no effect	Protect myself	#NULL!	#NULL!	#NULL!	#NULL!	#NULL!	#NULL!	#NULL!	#NULL!	#NULL!	#NULL!	#NULL!		Yes	Very effective	Yes, the full cost is paid	0.6594
59	65-74	High school	White, Non-Hispanic	Male	$30,000 to $34,999	Married	Metro	Midwest	Not working - retired	Yes	No, never	#NULL!	#NULL!	#NULL!	#NULL!	No	No	Yes	No	No	No	No	No	No	No	No		Yes	Don_t know	Don_t know	0.6976
60	55-64	High school	White, Non-Hispanic	Male	$75,000 to $84,999	Married	Metro	South	Not working - disabled	Yes	Yes, every year	$0	No, less likely	No, less likely	Protect myself and others	#NULL!	#NULL!	#NULL!	#NULL!	#NULL!	#NULL!	#NULL!	#NULL!	#NULL!	#NULL!	#NULL!		Yes	Very effective	Yes, the full cost is paid	0.8595
61	45-54	High school	White, Non-Hispanic	Female	$100,000 to $124,999	Married	Metro	Northeast	Working - as a paid employee	Yes	No, never	#NULL!	#NULL!	#NULL!	#NULL!	No	Yes	No	No	No	No	No	No	No	No	No		Yes	Not effective	Don_t know	0.8451
62	55-64	Some college	Black, Non-Hispanic	Male	$10,000 to $12,499	Married	Metro	Northeast	Not working - disabled	Yes	Yes, every year	$0	No, less likely	Yes, more likely	Protect myself and others	#NULL!	#NULL!	#NULL!	#NULL!	#NULL!	#NULL!	#NULL!	#NULL!	#NULL!	#NULL!	#NULL!		Yes	Somewhat effective	Yes, the full cost is paid	0.8676
63	35-44	Bachelor_s degree or higher	Hispanic	Male	$50,000 to $59,999	Never married	Metro	West	Working - self-employed	Yes	Yes, some years	$0	No, less likely	No, less likely	Protect myself	Yes	No	No	No	No	No	No	Yes	No	No	No		Yes	Somewhat effective	Don_t know	0.9598
64	55-64	Some college	Black, Non-Hispanic	Male	$100,000 to $124,999	Married	Metro	West	Working - as a paid employee	Yes	No, never	#NULL!	#NULL!	#NULL!	#NULL!	No	No	Yes	No	No	No	No	No	No	Yes	No	I take bugs and in 56 years never had flu	Yes	Not effective	Yes, the full cost is paid	1.0413
66	18-24	High school	White, Non-Hispanic	Male	Less than $5,000	Married	Metro	West	Not working - looking for work	Yes	Yes, every year	$0	No, no effect	No, no effect	Protect myself and others	#NULL!	#NULL!	#NULL!	#NULL!	#NULL!	#NULL!	#NULL!	#NULL!	#NULL!	#NULL!	#NULL!		Yes	Don_t know	Yes, the full cost is paid	1.1447
67	25-34	Bachelor_s degree or higher	White, Non-Hispanic	Female	$60,000 to $74,999	Never married	Non-Metro	Midwest	Working - as a paid employee	No	Yes, every year	$0	Yes, more likely	No, less likely	Protect myself and others	#NULL!	#NULL!	#NULL!	#NULL!	#NULL!	#NULL!	#NULL!	#NULL!	#NULL!	#NULL!	#NULL!		Yes	Somewhat effective	Don_t know	1.1392
68	25-34	Some college	Hispanic	Male	$125,000 to $149,999	Married	Metro	Northeast	Working - as a paid employee	Yes	No, never	#NULL!	#NULL!	#NULL!	#NULL!	No	No	No	No	Yes	No	No	No	No	No	No		Yes	Don_t know	Yes, the full cost is paid	1.319
69	18-24	Some college	Hispanic	Female	$75,000 to $84,999	Never married	Metro	Midwest	Working - as a paid employee	Yes	Yes, some years	Don_t know	Yes, more likely	No, less likely	Protect myself and others	Yes	No	No	Yes	No	No	No	Yes	Yes	No	No		No	Somewhat effective	#NULL!	1.8126
70	25-34	Bachelor_s degree or higher	Other, Non-Hispanic	Female	$125,000 to $149,999	Married	Metro	West	Working - as a paid employee	Yes	Yes, every year	Less than $30	Yes, more likely	No, less likely	Protect myself and others	#NULL!	#NULL!	#NULL!	#NULL!	#NULL!	#NULL!	#NULL!	#NULL!	#NULL!	#NULL!	#NULL!		Yes	It varies from season to season	No	1.5626
71	25-34	Less than high school	Black, Non-Hispanic	Male	$5,000 to $7,499	Never married	Metro	South	Working - as a paid employee	Yes	No, never	#NULL!	#NULL!	#NULL!	#NULL!	Yes	No	No	No	No	No	No	No	No	No	No		No	Don_t know	#NULL!	2.3261
72	25-34	Some college	2+ Races, Non-Hispanic	Female	$125,000 to $149,999	Never married	Metro	West	Not working - other	Yes	No, never	#NULL!	#NULL!	#NULL!	#NULL!	Yes	No	No	No	No	No	No	Yes	No	No	No		Yes	Very effective	No	0.4461
73	35-44	Bachelor_s degree or higher	White, Non-Hispanic	Female	$100,000 to $124,999	Married	Metro	Northeast	Working - as a paid employee	Yes	Yes, some years	Less than $30	No, no effect	No, no effect	Protect myself	No	Yes	No	No	No	Yes	No	No	No	No	No		Yes	Somewhat effective	Yes, the full cost is paid	0.9254
74	55-64	Bachelor_s degree or higher	White, Non-Hispanic	Male	$175,000 or more	Married	Metro	Northeast	Working - as a paid employee	Yes	Yes, some years	Less than $30	Yes, more likely	Yes, more likely	Protect myself and others	No	Yes	No	No	No	No	Yes	Yes	No	No	No		Yes	Somewhat effective	Yes, but only part of the cost is paid	0.576
75	55-64	High school	White, Non-Hispanic	Male	$25,000 to $29,999	Divorced	Metro	Midwest	Not working - retired	No	No, never	#NULL!	#NULL!	#NULL!	#NULL!	No	No	Yes	No	No	No	No	No	No	No	No		Yes	Somewhat effective	Yes, the full cost is paid	1.1534
76	55-64	Some college	White, Non-Hispanic	Male	$75,000 to $84,999	Married	Metro	South	Working - self-employed	Yes	Yes, every year	Less than $30	No, no effect	Refused	Protect myself and others	#NULL!	#NULL!	#NULL!	#NULL!	#NULL!	#NULL!	#NULL!	#NULL!	#NULL!	#NULL!	#NULL!		Yes	It varies from season to season	Don_t know	0.7343
77	45-54	High school	White, Non-Hispanic	Female	Less than $5,000	Divorced	Metro	Northeast	Not working - disabled	Yes	No, never	#NULL!	#NULL!	#NULL!	#NULL!	Yes	No	No	No	No	No	No	Yes	No	No	No		Yes	Don_t know	Don_t know	0.692
78	35-44	Bachelor_s degree or higher	Other, Non-Hispanic	Male	$150,000 to $174,999	Married	Metro	Northeast	Working - as a paid employee	Yes	No, never	#NULL!	#NULL!	#NULL!	#NULL!	No	No	No	No	No	No	Yes	No	No	No	No		Yes	Don_t know	Yes, the full cost is paid	1.4355
79	35-44	Some college	Hispanic	Male	$75,000 to $84,999	Divorced	Metro	West	Working - as a paid employee	Yes	No, never	#NULL!	#NULL!	#NULL!	#NULL!	Yes	No	Yes	No	No	No	No	No	No	No	No		Yes	It varies from season to season	Don_t know	1.2964
81	45-54	Some college	Hispanic	Male	$30,000 to $34,999	Married	Metro	South	Working - as a paid employee	Yes	No, never	#NULL!	#NULL!	#NULL!	#NULL!	No	No	No	No	No	No	Yes	No	No	No	No		Yes	Don_t know	Don_t know	1.0332
82	45-54	Bachelor_s degree or higher	Black, Non-Hispanic	Female	$100,000 to $124,999	Divorced	Metro	West	Working - as a paid employee	Yes	Yes, every year	$0	No, no effect	Yes, more likely	Protect myself	#NULL!	#NULL!	#NULL!	#NULL!	#NULL!	#NULL!	#NULL!	#NULL!	#NULL!	#NULL!	#NULL!		Yes	Very effective	Yes, the full cost is paid	0.9221
83	55-64	Less than high school	Hispanic	Male	$100,000 to $124,999	Married	Metro	South	Not working - retired	Yes	No, never	#NULL!	#NULL!	#NULL!	#NULL!	No	No	No	No	No	No	No	Yes	No	No	No		No	Somewhat effective	#NULL!	1.3751
84	25-34	Some college	Hispanic	Female	$50,000 to $59,999	Married	Metro	South	Working - as a paid employee	Yes	No, never	#NULL!	#NULL!	#NULL!	#NULL!	No	No	No	No	No	No	No	Yes	No	No	No		Yes	Not effective	Yes, the full cost is paid	1.3786
85	65-74	Bachelor_s degree or higher	Hispanic	Male	$85,000 to $99,999	Married	Non-Metro	West	Not working - retired	Yes	Yes, every year	$0	No, no effect	No, no effect	Protect myself	#NULL!	#NULL!	#NULL!	#NULL!	#NULL!	#NULL!	#NULL!	#NULL!	#NULL!	#NULL!	#NULL!		Yes	Very effective	Yes, the full cost is paid	1.2849
86	55-64	Bachelor_s degree or higher	White, Non-Hispanic	Male	$125,000 to $149,999	Married	Metro	Northeast	Working - self-employed	Yes	Yes, some years	Don_t know	No, no effect	No, no effect	Protect myself	No	No	No	No	Yes	No	No	No	No	No	No		Yes	Somewhat effective	Don_t know	0.657
87	35-44	Bachelor_s degree or higher	Black, Non-Hispanic	Male	$150,000 to $174,999	Married	Metro	South	Working - as a paid employee	Yes	Yes, every year	$0	Yes, more likely	Yes, more likely	Protect myself and others	#NULL!	#NULL!	#NULL!	#NULL!	#NULL!	#NULL!	#NULL!	#NULL!	#NULL!	#NULL!	#NULL!		Yes	Somewhat effective	Yes, the full cost is paid	1.2135
88	18-24	Some college	White, Non-Hispanic	Male	$100,000 to $124,999	Never married	Metro	Northeast	Working - as a paid employee	Yes	No, never	#NULL!	#NULL!	#NULL!	#NULL!	No	No	No	No	No	No	No	Yes	No	Yes	No	I am young	Yes	Don_t know	Don_t know	1.3859
89	55-64	High school	White, Non-Hispanic	Male	$20,000 to $24,999	Married	Non-Metro	Northeast	Working - as a paid employee	Yes	No, never	#NULL!	#NULL!	#NULL!	#NULL!	No	No	No	No	No	No	Yes	No	No	No	No		Yes	Somewhat effective	Yes, the full cost is paid	0.5746
90	18-24	Less than high school	White, Non-Hispanic	Female	$125,000 to $149,999	Never married	Metro	Northeast	Not working - other	Yes	No, never	#NULL!	#NULL!	#NULL!	#NULL!	No	No	No	No	Yes	No	No	No	No	No	No		Yes	Somewhat effective	Yes, the full cost is paid	1.8076
91	25-34	Bachelor_s degree or higher	White, Non-Hispanic	Male	$175,000 or more	Never married	Metro	Midwest	Not working - other	No	No, never	#NULL!	#NULL!	#NULL!	#NULL!	No	No	No	No	No	No	No	Yes	No	Yes	No		No	Don_t know	#NULL!	1.8014
92	25-34	Some college	White, Non-Hispanic	Female	$35,000 to $39,999	Separated	Metro	Northeast	Working - as a paid employee	No	No, never	#NULL!	#NULL!	#NULL!	#NULL!	No	No	No	No	Yes	No	Yes	No	No	No	No		Yes	Don_t know	Yes, the full cost is paid	1.4841
93	25-34	Bachelor_s degree or higher	White, Non-Hispanic	Female	$50,000 to $59,999	Living with partner	Non-Metro	South	Working - as a paid employee	Yes	No, never	#NULL!	#NULL!	#NULL!	#NULL!	No	Yes	Yes	No	No	No	Yes	Yes	No	No	No		Yes	It varies from season to season	Don_t know	0.9938
95	25-34	Bachelor_s degree or higher	White, Non-Hispanic	Female	$40,000 to $49,999	Married	Metro	Midwest	Working - self-employed	Yes	Yes, every year	$0	No, no effect	No, no effect	Protect myself and others	#NULL!	#NULL!	#NULL!	#NULL!	#NULL!	#NULL!	#NULL!	#NULL!	#NULL!	#NULL!	#NULL!		Yes	It varies from season to season	Yes, the full cost is paid	0.9178
96	18-24	High school	White, Non-Hispanic	Male	$50,000 to $59,999	Never married	Metro	Northeast	Working - as a paid employee	Yes	Yes, every year	$0	Yes, more likely	No, no effect	Protect myself and others	#NULL!	#NULL!	#NULL!	#NULL!	#NULL!	#NULL!	#NULL!	#NULL!	#NULL!	#NULL!	#NULL!		Yes	Very effective	Yes, the full cost is paid	1.2528
97	18-24	Bachelor_s degree or higher	White, Non-Hispanic	Male	$100,000 to $124,999	Never married	Metro	West	Working - as a paid employee	Yes	No, never	#NULL!	#NULL!	#NULL!	#NULL!	No	No	No	Yes	No	No	Yes	Yes	No	No	No		Yes	Somewhat effective	Don_t know	1.1449
98	35-44	Bachelor_s degree or higher	White, Non-Hispanic	Female	$100,000 to $124,999	Married	Metro	Midwest	Working - as a paid employee	Yes	Yes, some years	$30 to $60	No, no effect	Yes, more likely	Protect myself and others	No	No	No	No	No	No	No	Yes	No	No	No		Yes	Somewhat effective	Yes, the full cost is paid	0.9871
99	45-54	Some college	White, Non-Hispanic	Male	$100,000 to $124,999	Married	Metro	South	Working - as a paid employee	Yes	Yes, every year	Less than $30	Yes, more likely	Yes, more likely	Protect myself and others	#NULL!	#NULL!	#NULL!	#NULL!	#NULL!	#NULL!	#NULL!	#NULL!	#NULL!	#NULL!	#NULL!		Yes	Very effective	Yes, the full cost is paid	0.8375
100	55-64	Some college	White, Non-Hispanic	Male	$100,000 to $124,999	Married	Metro	West	Not working - disabled	Yes	Yes, every year	$0	No, no effect	No, no effect	Protect myself	#NULL!	#NULL!	#NULL!	#NULL!	#NULL!	#NULL!	#NULL!	#NULL!	#NULL!	#NULL!	#NULL!		Yes	Somewhat effective	Yes, the full cost is paid	0.7682
101	35-44	High school	White, Non-Hispanic	Male	$30,000 to $34,999	Married	Metro	Northeast	Not working - looking for work	Yes	No, never	#NULL!	#NULL!	#NULL!	#NULL!	No	No	Yes	No	No	No	No	No	No	No	No		Yes	Don_t know	Yes, the full cost is paid	0.9486
102	55-64	Some college	White, Non-Hispanic	Male	$12,500 to $14,999	Married	Metro	Midwest	Working - as a paid employee	Yes	No, never	#NULL!	#NULL!	#NULL!	#NULL!	No	No	No	No	Yes	No	No	No	No	No	No		Yes	Somewhat effective	Don_t know	0.6827
103	65-74	Some college	Hispanic	Male	$50,000 to $59,999	Married	Metro	West	Not working - retired	Yes	Yes, every year	$0	No, no effect	No, no effect	Protect myself and others	#NULL!	#NULL!	#NULL!	#NULL!	#NULL!	#NULL!	#NULL!	#NULL!	#NULL!	#NULL!	#NULL!		Yes	Somewhat effective	Yes, the full cost is paid	0.7872
104	55-64	Bachelor_s degree or higher	White, Non-Hispanic	Male	$30,000 to $34,999	Married	Metro	South	Working - self-employed	Yes	Yes, some years	$0	No, no effect	No, no effect	Protect myself and others	No	Yes	Yes	No	Yes	No	No	No	No	No	No		Yes	Somewhat effective	No	0.6545
105	25-34	Bachelor_s degree or higher	Other, Non-Hispanic	Female	$175,000 or more	Married	Metro	South	Working - as a paid employee	Yes	Yes, every year	$0	No, no effect	No, no effect	Protect myself and others	#NULL!	#NULL!	#NULL!	#NULL!	#NULL!	#NULL!	#NULL!	#NULL!	#NULL!	#NULL!	#NULL!		Yes	It varies from season to season	Yes, the full cost is paid	1.7034
106	55-64	Some college	White, Non-Hispanic	Male	$40,000 to $49,999	Never married	Metro	Northeast	Not working - retired	Yes	Yes, some years	Don_t know	No, no effect	No, no effect	Protect myself and others	No	No	Yes	No	No	No	No	Yes	No	No	No		Yes	Somewhat effective	Yes, the full cost is paid	0.6372
107	25-34	Bachelor_s degree or higher	White, Non-Hispanic	Female	$40,000 to $49,999	Never married	Metro	South	Working - as a paid employee	Yes	No, never	#NULL!	#NULL!	#NULL!	#NULL!	No	No	No	No	No	No	No	Yes	No	No	No		Yes	Somewhat effective	Don_t know	1.0724
108	18-24	High school	Hispanic	Male	$40,000 to $49,999	Never married	Metro	Northeast	Not working - other	Yes	Yes, every year	Less than $30	Yes, more likely	Yes, more likely	Protect myself and others	#NULL!	#NULL!	#NULL!	#NULL!	#NULL!	#NULL!	#NULL!	#NULL!	#NULL!	#NULL!	#NULL!		Yes	Somewhat effective	Don_t know	1.7547
109	75+	Bachelor_s degree or higher	White, Non-Hispanic	Female	$20,000 to $24,999	Widowed	Metro	West	Not working - retired	Yes	Yes, every year	$0	No, no effect	No, no effect	Protect myself	#NULL!	#NULL!	#NULL!	#NULL!	#NULL!	#NULL!	#NULL!	#NULL!	#NULL!	#NULL!	#NULL!		Yes	It varies from season to season	Yes, the full cost is paid	0.5253
110	55-64	Some college	White, Non-Hispanic	Female	$30,000 to $34,999	Divorced	Metro	West	Not working - other	Yes	No, never	#NULL!	#NULL!	#NULL!	#NULL!	No	No	No	No	No	No	No	No	No	Yes	No	Don_t think its necessary	Yes	Somewhat effective	Yes, the full cost is paid	0.7097
111	65-74	High school	White, Non-Hispanic	Male	$30,000 to $34,999	Married	Metro	West	Not working - retired	Yes	Yes, every year	$0	Yes, more likely	Yes, more likely	Protect myself	#NULL!	#NULL!	#NULL!	#NULL!	#NULL!	#NULL!	#NULL!	#NULL!	#NULL!	#NULL!	#NULL!		Yes	Somewhat effective	Yes, the full cost is paid	0.6428
112	35-44	Bachelor_s degree or higher	White, Non-Hispanic	Female	$60,000 to $74,999	Married	Metro	Northeast	Working - as a paid employee	Yes	Yes, some years	$30 to $60	No, no effect	No, no effect	Protect myself and others	Yes	No	No	No	No	No	No	Yes	No	Yes	No	I wouldn_t say the vaccine is too risky but I had unpleasant side effects the last time which made me wary. Spiked a fever for two days and had to miss work for just getting the vaccine.	Yes	Somewhat effective	Don_t know	0.8151
113	45-54	High school	Black, Non-Hispanic	Female	$50,000 to $59,999	Widowed	Metro	South	Working - as a paid employee	Yes	Yes, every year	$0	Yes, more likely	No, no effect	Protect myself and others	#NULL!	#NULL!	#NULL!	#NULL!	#NULL!	#NULL!	#NULL!	#NULL!	#NULL!	#NULL!	#NULL!		Yes	Very effective	Yes, the full cost is paid	1.081
114	18-24	Some college	White, Non-Hispanic	Female	$40,000 to $49,999	Never married	Metro	Midwest	Not working - other	Yes	No, never	#NULL!	#NULL!	#NULL!	#NULL!	No	No	Yes	No	No	No	No	No	No	No	No		Yes	Somewhat effective	Yes, but only part of the cost is paid	1.2702
115	55-64	Some college	White, Non-Hispanic	Female	$35,000 to $39,999	Divorced	Metro	West	Not working - other	Yes	No, never	#NULL!	#NULL!	#NULL!	#NULL!	No	No	Yes	No	No	No	No	No	No	No	No		Yes	Don_t know	Don_t know	0.7525
116	25-34	Some college	White, Non-Hispanic	Female	$75,000 to $84,999	Divorced	Metro	South	Working - as a paid employee	No	No, never	#NULL!	#NULL!	#NULL!	#NULL!	No	No	No	No	Yes	No	No	No	No	No	No		Yes	Somewhat effective	Yes, the full cost is paid	1.9893
117	35-44	Less than high school	White, Non-Hispanic	Male	$35,000 to $39,999	Married	Metro	Northeast	Working - as a paid employee	No	No, never	#NULL!	#NULL!	#NULL!	#NULL!	No	No	No	No	No	No	Yes	No	No	No	No		Yes	Somewhat effective	Yes, the full cost is paid	1.8913
118	18-24	Some college	White, Non-Hispanic	Male	$85,000 to $99,999	Never married	Metro	West	Not working - other	Yes	No, never	#NULL!	#NULL!	#NULL!	#NULL!	No	No	No	Yes	No	No	No	Yes	No	No	No		Yes	Somewhat effective	Don_t know	1.3621
119	25-34	High school	White, Non-Hispanic	Female	$35,000 to $39,999	Living with partner	Metro	West	Working - as a paid employee	No	Yes, some years	Don_t know	No, no effect	No, no effect	Protect myself and others	No	No	No	Yes	No	No	No	No	No	No	No		Yes	Somewhat effective	Don_t know	1.7414
120	25-34	Some college	White, Non-Hispanic	Male	$15,000 to $19,999	Never married	Metro	Midwest	Working - as a paid employee	Yes	No, never	#NULL!	#NULL!	#NULL!	#NULL!	No	No	No	No	No	No	Yes	No	No	No	No		No	Somewhat effective	#NULL!	0.8683
121	55-64	Less than high school	White, Non-Hispanic	Male	$40,000 to $49,999	Married	Metro	Northeast	Working - self-employed	Yes	No, never	#NULL!	#NULL!	#NULL!	#NULL!	No	No	Yes	No	No	No	No	No	No	No	No		Yes	Somewhat effective	Yes, the full cost is paid	0.8993
122	35-44	Bachelor_s degree or higher	White, Non-Hispanic	Male	$85,000 to $99,999	Married	Metro	Northeast	Working - as a paid employee	Yes	Yes, every year	$0	Yes, more likely	No, no effect	Protect myself and others	#NULL!	#NULL!	#NULL!	#NULL!	#NULL!	#NULL!	#NULL!	#NULL!	#NULL!	#NULL!	#NULL!		Yes	Somewhat effective	Yes, the full cost is paid	0.8356
123	25-34	Some college	2+ Races, Non-Hispanic	Female	$75,000 to $84,999	Never married	Metro	Midwest	Working - as a paid employee	Yes	No, never	#NULL!	#NULL!	#NULL!	#NULL!	No	Yes	Yes	No	No	Yes	No	No	No	No	No		Yes	Don_t know	Yes, the full cost is paid	0.4163
124	18-24	High school	Black, Non-Hispanic	Male	$15,000 to $19,999	Never married	Metro	Midwest	Not working - looking for work	Yes	No, never	#NULL!	#NULL!	#NULL!	#NULL!	No	No	Yes	No	No	No	No	No	No	No	No		Yes	Don_t know	Don_t know	1.684
126	55-64	High school	Other, Non-Hispanic	Female	$100,000 to $124,999	Married	Metro	South	Not working - retired	Yes	No, never	#NULL!	#NULL!	#NULL!	#NULL!	No	Yes	No	No	No	No	No	Yes	No	No	No		Yes	It varies from season to season	Don_t know	1.5555
127	75+	Less than high school	Black, Non-Hispanic	Female	$75,000 to $84,999	Separated	Metro	Northeast	Not working - retired	Yes	No, never	#NULL!	#NULL!	#NULL!	#NULL!	No	Yes	No	Yes	No	Yes	No	No	No	No	No		Yes	Not effective	Yes, the full cost is paid	1.4857
128	45-54	Bachelor_s degree or higher	Other, Non-Hispanic	Male	$40,000 to $49,999	Separated	Metro	West	Working - as a paid employee	Yes	Yes, some years	$0	Yes, more likely	No, no effect	Protect myself and others	No	No	No	No	Yes	No	No	No	No	No	No		Yes	Somewhat effective	Yes, the full cost is paid	1.0314
129	45-54	Bachelor_s degree or higher	White, Non-Hispanic	Female	$85,000 to $99,999	Married	Metro	West	Working - as a paid employee	Yes	Yes, every year	$30 to $60	No, no effect	Yes, more likely	Protect myself and others	#NULL!	#NULL!	#NULL!	#NULL!	#NULL!	#NULL!	#NULL!	#NULL!	#NULL!	#NULL!	#NULL!		Yes	Somewhat effective	Don_t know	0.6802
130	65-74	Bachelor_s degree or higher	White, Non-Hispanic	Female	$50,000 to $59,999	Married	Non-Metro	Midwest	Not working - retired	Yes	No, never	#NULL!	#NULL!	#NULL!	#NULL!	No	Yes	No	No	No	Yes	No	No	No	No	No		Yes	Somewhat effective	Yes, but only part of the cost is paid	0.5542
131	55-64	High school	White, Non-Hispanic	Male	$25,000 to $29,999	Married	Metro	West	Not working - disabled	Yes	Yes, every year	$0	Yes, more likely	Yes, more likely	Protect myself	#NULL!	#NULL!	#NULL!	#NULL!	#NULL!	#NULL!	#NULL!	#NULL!	#NULL!	#NULL!	#NULL!		Yes	Somewhat effective	Yes, the full cost is paid	0.6428
132	65-74	Some college	White, Non-Hispanic	Male	$50,000 to $59,999	Married	Non-Metro	South	Not working - retired	Yes	No, never	#NULL!	#NULL!	#NULL!	#NULL!	No	No	Yes	No	No	No	No	No	No	No	No		Yes	It varies from season to season	Yes, the full cost is paid	0.6327
133	65-74	Bachelor_s degree or higher	White, Non-Hispanic	Male	$150,000 to $174,999	Married	Metro	Northeast	Not working - retired	Yes	No, never	#NULL!	#NULL!	#NULL!	#NULL!	No	No	No	No	No	No	No	No	No	Yes	No	never had the illness, why iix a problem which is not broken	Yes	Don_t know	Yes, the full cost is paid	0.576
134	25-34	Bachelor_s degree or higher	White, Non-Hispanic	Female	$50,000 to $59,999	Living with partner	Metro	South	Working - as a paid employee	Yes	No, never	#NULL!	#NULL!	#NULL!	#NULL!	No	No	No	No	No	No	No	Yes	No	No	No		Yes	Very effective	Don_t know	1.0159
135	55-64	Bachelor_s degree or higher	White, Non-Hispanic	Female	$100,000 to $124,999	Married	Metro	South	Working - as a paid employee	Yes	No, never	#NULL!	#NULL!	#NULL!	#NULL!	No	No	No	No	No	No	No	No	No	Yes	No	i don_t want to	Yes	Somewhat effective	Don_t know	0.7416
136	55-64	Some college	White, Non-Hispanic	Male	$85,000 to $99,999	Living with partner	Metro	West	Working - as a paid employee	Yes	No, never	#NULL!	#NULL!	#NULL!	#NULL!	No	No	Yes	No	No	No	No	No	No	No	No		Yes	It varies from season to season	Yes, the full cost is paid	0.7682
137	55-64	Less than high school	Black, Non-Hispanic	Female	Less than $5,000	Never married	Metro	South	Not working - looking for work	No	No, never	#NULL!	#NULL!	#NULL!	#NULL!	No	No	No	No	No	No	No	No	No	No	Yes		No	Very effective	#NULL!	2.0037
138	55-64	High school	Hispanic	Female	$40,000 to $49,999	Married	Metro	West	Not working - other	Yes	Yes, every year	$30 to $60	No, no effect	No, no effect	Protect myself	#NULL!	#NULL!	#NULL!	#NULL!	#NULL!	#NULL!	#NULL!	#NULL!	#NULL!	#NULL!	#NULL!		Yes	Very effective	Yes, the full cost is paid	0.9664
139	65-74	High school	White, Non-Hispanic	Male	$60,000 to $74,999	Married	Metro	West	Not working - retired	Yes	Yes, every year	$0	No, no effect	No, no effect	Protect myself and others	#NULL!	#NULL!	#NULL!	#NULL!	#NULL!	#NULL!	#NULL!	#NULL!	#NULL!	#NULL!	#NULL!		Yes	It varies from season to season	Yes, the full cost is paid	0.6089
140	35-44	High school	White, Non-Hispanic	Male	$15,000 to $19,999	Never married	Non-Metro	South	Not working - disabled	Yes	Yes, every year	$0	Yes, more likely	Yes, more likely	Protect myself and others	#NULL!	#NULL!	#NULL!	#NULL!	#NULL!	#NULL!	#NULL!	#NULL!	#NULL!	#NULL!	#NULL!		Yes	Very effective	Yes, the full cost is paid	0.8756
141	35-44	High school	White, Non-Hispanic	Male	$75,000 to $84,999	Never married	Metro	Midwest	Not working - disabled	Yes	No, never	#NULL!	#NULL!	#NULL!	#NULL!	No	No	No	Yes	No	No	No	No	No	No	No		Yes	Very effective	Don_t know	1.0883
142	55-64	Bachelor_s degree or higher	Hispanic	Male	$175,000 or more	Married	Metro	South	Working - as a paid employee	Yes	No, never	#NULL!	#NULL!	#NULL!	#NULL!	No	No	No	No	No	No	No	No	No	Yes	No	Don_t believe in vaccination	Yes	It varies from season to season	Yes, the full cost is paid	0.8189
143	45-54	Some college	Hispanic	Female	$35,000 to $39,999	Divorced	Metro	West	Working - as a paid employee	Yes	Yes, some years	$0	No, no effect	No, no effect	Protect myself and others	No	No	No	No	No	No	No	Yes	No	No	No		Yes	Somewhat effective	Yes, the full cost is paid	0.9984
144	55-64	Bachelor_s degree or higher	White, Non-Hispanic	Male	$85,000 to $99,999	Never married	Metro	West	Working - as a paid employee	No	Yes, every year	$0	No, no effect	No, no effect	Protect myself	#NULL!	#NULL!	#NULL!	#NULL!	#NULL!	#NULL!	#NULL!	#NULL!	#NULL!	#NULL!	#NULL!		Yes	Somewhat effective	Don_t know	0.8208
145	18-24	Some college	White, Non-Hispanic	Male	$60,000 to $74,999	Never married	Metro	West	Working - as a paid employee	Yes	Yes, every year	$0	No, less likely	No, no effect	Protect myself and others	#NULL!	#NULL!	#NULL!	#NULL!	#NULL!	#NULL!	#NULL!	#NULL!	#NULL!	#NULL!	#NULL!		Yes	Somewhat effective	Yes, the full cost is paid	1.1997
146	35-44	Some college	White, Non-Hispanic	Female	$100,000 to $124,999	Married	Metro	South	Working - as a paid employee	Yes	Yes, some years	$0	No, less likely	No, no effect	Protect myself and others	No	No	No	No	Yes	No	No	No	No	No	No		Yes	It varies from season to season	Yes, the full cost is paid	1.1796
147	45-54	Bachelor_s degree or higher	White, Non-Hispanic	Female	$100,000 to $124,999	Married	Metro	Northeast	Working - as a paid employee	Yes	No, never	#NULL!	#NULL!	#NULL!	#NULL!	No	No	Yes	No	No	No	Yes	No	No	No	No		Yes	Somewhat effective	Don_t know	0.6921
148	25-34	Bachelor_s degree or higher	White, Non-Hispanic	Female	$100,000 to $124,999	Married	Metro	Northeast	Working - as a paid employee	No	Yes, some years	$30 to $60	No, less likely	No, less likely	Protect others	Yes	No	No	No	No	No	No	No	No	No	No		No	Somewhat effective	#NULL!	1.5606
149	25-34	Bachelor_s degree or higher	2+ Races, Non-Hispanic	Female	$25,000 to $29,999	Never married	Metro	Midwest	Working - as a paid employee	No	No, never	#NULL!	#NULL!	#NULL!	#NULL!	No	No	Yes	No	Yes	No	No	No	No	No	No		Yes	Don_t know	Don_t know	0.5486
150	35-44	Bachelor_s degree or higher	White, Non-Hispanic	Female	$150,000 to $174,999	Divorced	Metro	Northeast	Working - as a paid employee	Yes	Refused	#NULL!	#NULL!	#NULL!	#NULL!	#NULL!	#NULL!	#NULL!	#NULL!	#NULL!	#NULL!	#NULL!	#NULL!	#NULL!	#NULL!	#NULL!		Refused	Refused	#NULL!	0.9254
151	65-74	Bachelor_s degree or higher	2+ Races, Non-Hispanic	Male	$100,000 to $124,999	Married	Non-Metro	Northeast	Not working - retired	Yes	Yes, every year	$0	No, no effect	No, no effect	Protect myself and others	#NULL!	#NULL!	#NULL!	#NULL!	#NULL!	#NULL!	#NULL!	#NULL!	#NULL!	#NULL!	#NULL!		Yes	Somewhat effective	Yes, but only part of the cost is paid	0.2705
152	45-54	High school	Black, Non-Hispanic	Female	Less than $5,000	Never married	Metro	South	Working - self-employed	No	Yes, every year	More than $60	No, no effect	No, no effect	Protect myself	#NULL!	#NULL!	#NULL!	#NULL!	#NULL!	#NULL!	#NULL!	#NULL!	#NULL!	#NULL!	#NULL!		Refused	It varies from season to season	#NULL!	1.457
153	75+	High school	White, Non-Hispanic	Male	$40,000 to $49,999	Married	Metro	Northeast	Not working - retired	Yes	Yes, every year	$0	Yes, more likely	No, no effect	Protect myself and others	#NULL!	#NULL!	#NULL!	#NULL!	#NULL!	#NULL!	#NULL!	#NULL!	#NULL!	#NULL!	#NULL!		Yes	Very effective	Yes, the full cost is paid	0.654
154	35-44	Bachelor_s degree or higher	White, Non-Hispanic	Female	$150,000 to $174,999	Married	Metro	Northeast	Working - as a paid employee	Yes	Yes, every year	$0	Yes, more likely	No, no effect	Protect myself and others	#NULL!	#NULL!	#NULL!	#NULL!	#NULL!	#NULL!	#NULL!	#NULL!	#NULL!	#NULL!	#NULL!		Yes	It varies from season to season	Yes, the full cost is paid	0.9254
155	55-64	Some college	White, Non-Hispanic	Male	$15,000 to $19,999	Divorced	Non-Metro	Midwest	Not working - disabled	Yes	Yes, every year	$0	No, no effect	No, no effect	Protect myself	#NULL!	#NULL!	#NULL!	#NULL!	#NULL!	#NULL!	#NULL!	#NULL!	#NULL!	#NULL!	#NULL!		Yes	Somewhat effective	Yes, the full cost is paid	0.541
156	75+	Less than high school	Hispanic	Male	$60,000 to $74,999	Divorced	Metro	West	Not working - retired	Yes	Yes, some years	Less than $30	Yes, more likely	No, less likely	Protect myself	No	Yes	No	No	No	No	No	No	No	No	No		Yes	Somewhat effective	Yes, but only part of the cost is paid	1.111
157	45-54	Bachelor_s degree or higher	Black, Non-Hispanic	Male	$20,000 to $24,999	Never married	Metro	Northeast	Working - as a paid employee	Yes	Yes, every year	$0	No, no effect	No, no effect	Protect myself	#NULL!	#NULL!	#NULL!	#NULL!	#NULL!	#NULL!	#NULL!	#NULL!	#NULL!	#NULL!	#NULL!		Yes	Somewhat effective	Yes, the full cost is paid	0.7292
158	25-34	High school	2+ Races, Non-Hispanic	Male	$12,500 to $14,999	Married	Metro	West	Not working - disabled	Yes	Yes, every year	$0	Refused	Yes, more likely	Protect myself and others	#NULL!	#NULL!	#NULL!	#NULL!	#NULL!	#NULL!	#NULL!	#NULL!	#NULL!	#NULL!	#NULL!		Yes	It varies from season to season	Yes, the full cost is paid	0.291
159	45-54	Bachelor_s degree or higher	White, Non-Hispanic	Female	$20,000 to $24,999	Married	Non-Metro	West	Working - self-employed	Yes	No, never	#NULL!	#NULL!	#NULL!	#NULL!	Yes	Yes	Yes	No	Yes	No	No	No	No	No	No		No	Not effective	#NULL!	0.9527
160	65-74	Bachelor_s degree or higher	White, Non-Hispanic	Male	$150,000 to $174,999	Married	Metro	West	Not working - retired	Yes	Yes, every year	$0	No, no effect	No, no effect	Protect myself	#NULL!	#NULL!	#NULL!	#NULL!	#NULL!	#NULL!	#NULL!	#NULL!	#NULL!	#NULL!	#NULL!		Yes	It varies from season to season	Yes, the full cost is paid	0.5662
161	55-64	High school	White, Non-Hispanic	Female	$15,000 to $19,999	Never married	Metro	Northeast	Not working - disabled	Yes	Yes, every year	$0	No, less likely	Yes, more likely	Protect myself and others	#NULL!	#NULL!	#NULL!	#NULL!	#NULL!	#NULL!	#NULL!	#NULL!	#NULL!	#NULL!	#NULL!		Yes	Somewhat effective	Yes, the full cost is paid	0.6526
162	25-34	Bachelor_s degree or higher	White, Non-Hispanic	Female	$125,000 to $149,999	Living with partner	Metro	Northeast	Working - as a paid employee	Yes	Yes, every year	$0	No, no effect	Yes, more likely	Protect myself and others	#NULL!	#NULL!	#NULL!	#NULL!	#NULL!	#NULL!	#NULL!	#NULL!	#NULL!	#NULL!	#NULL!		Yes	It varies from season to season	Yes, the full cost is paid	1.0765
163	45-54	Some college	White, Non-Hispanic	Female	$50,000 to $59,999	Divorced	Metro	West	Working - as a paid employee	Yes	No, never	#NULL!	#NULL!	#NULL!	#NULL!	No	No	No	No	No	No	No	No	No	Yes	No	percentage of affect is to prevent is low	Yes	It varies from season to season	Don_t know	0.7128
164	75+	Some college	White, Non-Hispanic	Female	$35,000 to $39,999	Married	Metro	Northeast	Not working - retired	Yes	Yes, every year	$0	No, no effect	No, no effect	Protect myself and others	#NULL!	#NULL!	#NULL!	#NULL!	#NULL!	#NULL!	#NULL!	#NULL!	#NULL!	#NULL!	#NULL!		Yes	Somewhat effective	Yes, the full cost is paid	0.722
165	45-54	Some college	White, Non-Hispanic	Male	$125,000 to $149,999	Married	Metro	West	Working - as a paid employee	Yes	Yes, every year	$0	No, no effect	No, no effect	Protect myself	#NULL!	#NULL!	#NULL!	#NULL!	#NULL!	#NULL!	#NULL!	#NULL!	#NULL!	#NULL!	#NULL!		Yes	Very effective	Don_t know	0.7682
166	65-74	Some college	White, Non-Hispanic	Male	$150,000 to $174,999	Married	Metro	Northeast	Not working - retired	Yes	Yes, every year	$0	Yes, more likely	Yes, more likely	Protect myself and others	#NULL!	#NULL!	#NULL!	#NULL!	#NULL!	#NULL!	#NULL!	#NULL!	#NULL!	#NULL!	#NULL!		Yes	Very effective	Yes, the full cost is paid	0.6853
167	55-64	High school	White, Non-Hispanic	Male	$15,000 to $19,999	Divorced	Metro	West	Not working - disabled	No	No, never	#NULL!	#NULL!	#NULL!	#NULL!	No	No	No	No	No	No	No	Yes	No	No	No		Yes	It varies from season to season	Yes, the full cost is paid	0.936
168	25-34	Bachelor_s degree or higher	Other, Non-Hispanic	Male	$75,000 to $84,999	Never married	Metro	West	Working - as a paid employee	Yes	Yes, some years	Less than $30	No, no effect	No, no effect	Protect myself	No	No	Yes	No	No	No	No	Yes	No	No	No		Yes	It varies from season to season	Don_t know	1.4108
169	35-44	Some college	White, Non-Hispanic	Male	$75,000 to $84,999	Married	Metro	West	Working - as a paid employee	Yes	No, never	#NULL!	#NULL!	#NULL!	#NULL!	No	No	Yes	No	No	No	No	No	No	No	No		Yes	Not effective	Yes, the full cost is paid	0.977
170	55-64	Some college	White, Non-Hispanic	Female	$100,000 to $124,999	Married	Metro	Midwest	Not working - retired	Yes	Yes, some years	Less than $30	Yes, more likely	Yes, more likely	Protect myself and others	No	No	Yes	No	No	No	Yes	Yes	No	No	No		Yes	Somewhat effective	Yes, the full cost is paid	0.8783
171	35-44	Some college	White, Non-Hispanic	Male	$30,000 to $34,999	Married	Metro	South	Working - self-employed	Yes	No, never	#NULL!	#NULL!	#NULL!	#NULL!	No	No	No	No	No	No	No	Yes	No	No	No		Yes	Very effective	Don_t know	0.9903
172	55-64	High school	White, Non-Hispanic	Male	$50,000 to $59,999	Married	Metro	Northeast	Working - as a paid employee	Yes	Yes, every year	$0	No, no effect	No, no effect	Protect myself and others	#NULL!	#NULL!	#NULL!	#NULL!	#NULL!	#NULL!	#NULL!	#NULL!	#NULL!	#NULL!	#NULL!		Yes	Very effective	Yes, the full cost is paid	0.6195
173	65-74	Some college	White, Non-Hispanic	Female	$12,500 to $14,999	Widowed	Non-Metro	Northeast	Not working - retired	Yes	No, never	#NULL!	#NULL!	#NULL!	#NULL!	No	Yes	Yes	No	Yes	No	No	No	No	No	No		Yes	It varies from season to season	Don_t know	0.5563
174	75+	Bachelor_s degree or higher	White, Non-Hispanic	Female	$20,000 to $24,999	Divorced	Metro	South	Working - self-employed	Yes	No, never	#NULL!	#NULL!	#NULL!	#NULL!	No	No	No	No	No	No	No	Yes	No	No	No		Yes	Somewhat effective	Yes, the full cost is paid	0.5727
175	18-24	Bachelor_s degree or higher	White, Non-Hispanic	Female	$30,000 to $34,999	Never married	Non-Metro	Midwest	Working - as a paid employee	Yes	Yes, every year	Less than $30	Yes, more likely	No, no effect	Protect myself and others	#NULL!	#NULL!	#NULL!	#NULL!	#NULL!	#NULL!	#NULL!	#NULL!	#NULL!	#NULL!	#NULL!		Yes	Somewhat effective	Don_t know	0.9649
176	75+	High school	White, Non-Hispanic	Female	$25,000 to $29,999	Widowed	Metro	West	Not working - other	Yes	Yes, every year	$0	Yes, more likely	Yes, more likely	Protect myself and others	#NULL!	#NULL!	#NULL!	#NULL!	#NULL!	#NULL!	#NULL!	#NULL!	#NULL!	#NULL!	#NULL!		Yes	Very effective	Yes, the full cost is paid	0.7283
177	25-34	Bachelor_s degree or higher	White, Non-Hispanic	Female	$150,000 to $174,999	Married	Metro	West	Working - as a paid employee	Yes	No, never	#NULL!	#NULL!	#NULL!	#NULL!	No	No	No	No	No	No	No	Yes	No	No	No		Yes	Somewhat effective	No	0.9096
178	25-34	Bachelor_s degree or higher	White, Non-Hispanic	Female	$125,000 to $149,999	Married	Metro	South	Working - as a paid employee	Yes	Yes, every year	$0	No, no effect	No, no effect	Protect myself and others	#NULL!	#NULL!	#NULL!	#NULL!	#NULL!	#NULL!	#NULL!	#NULL!	#NULL!	#NULL!	#NULL!		Yes	Very effective	Yes, the full cost is paid	0.9915
179	55-64	High school	White, Non-Hispanic	Female	$30,000 to $34,999	Divorced	Metro	West	Working - as a paid employee	Yes	Yes, every year	$0	No, no effect	No, no effect	Protect myself and others	#NULL!	#NULL!	#NULL!	#NULL!	#NULL!	#NULL!	#NULL!	#NULL!	#NULL!	#NULL!	#NULL!		Yes	Very effective	Yes, the full cost is paid	0.7723
180	25-34	Bachelor_s degree or higher	White, Non-Hispanic	Male	$100,000 to $124,999	Married	Metro	Northeast	Working - as a paid employee	Yes	Yes, every year	$0	No, no effect	No, no effect	Protect myself and others	#NULL!	#NULL!	#NULL!	#NULL!	#NULL!	#NULL!	#NULL!	#NULL!	#NULL!	#NULL!	#NULL!		Yes	Very effective	Yes, the full cost is paid	0.8356
181	25-34	Some college	White, Non-Hispanic	Male	$50,000 to $59,999	Married	Metro	Midwest	Not working - retired	Yes	Yes, every year	$0	Yes, more likely	Yes, more likely	Protect myself and others	#NULL!	#NULL!	#NULL!	#NULL!	#NULL!	#NULL!	#NULL!	#NULL!	#NULL!	#NULL!	#NULL!		Yes	Very effective	Yes, the full cost is paid	0.934
182	45-54	High school	White, Non-Hispanic	Male	$60,000 to $74,999	Married	Metro	Northeast	Working - as a paid employee	Yes	No, never	#NULL!	#NULL!	#NULL!	#NULL!	No	No	No	No	Yes	No	Yes	Yes	No	No	No		Yes	It varies from season to season	Yes, the full cost is paid	0.7066
183	75+	Bachelor_s degree or higher	White, Non-Hispanic	Female	$100,000 to $124,999	Married	Metro	West	Not working - retired	Yes	Yes, every year	$0	No, no effect	No, no effect	Protect myself and others	#NULL!	#NULL!	#NULL!	#NULL!	#NULL!	#NULL!	#NULL!	#NULL!	#NULL!	#NULL!	#NULL!		Yes	Somewhat effective	Yes, the full cost is paid	0.6415
184	25-34	Bachelor_s degree or higher	White, Non-Hispanic	Female	$100,000 to $124,999	Married	Metro	South	Working - as a paid employee	Yes	Yes, every year	$0	Yes, more likely	No, no effect	Protect myself and others	#NULL!	#NULL!	#NULL!	#NULL!	#NULL!	#NULL!	#NULL!	#NULL!	#NULL!	#NULL!	#NULL!		Yes	Very effective	Yes, the full cost is paid	0.9915
185	25-34	Bachelor_s degree or higher	White, Non-Hispanic	Female	$60,000 to $74,999	Married	Metro	West	Working - as a paid employee	Yes	Yes, some years	$0	No, no effect	No, no effect	Protect myself and others	No	No	No	No	No	No	No	Yes	No	No	No		Yes	Don_t know	Yes, the full cost is paid	0.9319
186	25-34	Bachelor_s degree or higher	White, Non-Hispanic	Male	$30,000 to $34,999	Married	Metro	Midwest	Working - as a paid employee	No	Yes, some years	Less than $30	Yes, more likely	No, less likely	Protect myself and others	No	Yes	No	No	No	No	No	No	No	Yes	No	My wife is strongly against it	Yes	It varies from season to season	Don_t know	1.6749
187	75+	Some college	Hispanic	Male	$100,000 to $124,999	Married	Metro	West	Working - as a paid employee	Yes	Yes, every year	$0	No, no effect	Yes, more likely	Protect myself and others	#NULL!	#NULL!	#NULL!	#NULL!	#NULL!	#NULL!	#NULL!	#NULL!	#NULL!	#NULL!	#NULL!		Yes	Somewhat effective	Yes, the full cost is paid	0.8937
188	65-74	High school	White, Non-Hispanic	Male	$50,000 to $59,999	Married	Metro	Midwest	Not working - retired	Yes	Yes, every year	$0	Yes, more likely	Yes, more likely	Protect myself and others	#NULL!	#NULL!	#NULL!	#NULL!	#NULL!	#NULL!	#NULL!	#NULL!	#NULL!	#NULL!	#NULL!		Yes	Somewhat effective	Yes, the full cost is paid	0.6608
189	35-44	Bachelor_s degree or higher	Black, Non-Hispanic	Female	$40,000 to $49,999	Married	Metro	South	Working - as a paid employee	Yes	No, never	#NULL!	#NULL!	#NULL!	#NULL!	No	No	Yes	No	No	No	No	No	No	No	No		Yes	Somewhat effective	Don_t know	1.2497
190	35-44	Some college	Black, Non-Hispanic	Male	$125,000 to $149,999	Married	Metro	West	Working - as a paid employee	Yes	No, never	#NULL!	#NULL!	#NULL!	#NULL!	No	No	Yes	No	No	No	No	No	No	No	No		Yes	Somewhat effective	Yes, the full cost is paid	1.3244
191	25-34	High school	White, Non-Hispanic	Male	$25,000 to $29,999	Never married	Metro	West	Working - as a paid employee	Yes	No, never	#NULL!	#NULL!	#NULL!	#NULL!	No	No	Yes	No	No	No	No	No	No	No	No		Yes	It varies from season to season	Don_t know	1.2998
192	25-34	High school	White, Non-Hispanic	Female	$25,000 to $29,999	Living with partner	Non-Metro	Midwest	Working - as a paid employee	Yes	Yes, every year	$0	Yes, more likely	No, no effect	Protect myself and others	#NULL!	#NULL!	#NULL!	#NULL!	#NULL!	#NULL!	#NULL!	#NULL!	#NULL!	#NULL!	#NULL!		Yes	Very effective	Don_t know	1.0129
193	45-54	Some college	White, Non-Hispanic	Female	$40,000 to $49,999	Married	Metro	South	Working - as a paid employee	Yes	Yes, some years	$0	No, no effect	No, no effect	Protect myself	No	No	No	No	Yes	No	No	No	No	No	No		Yes	Somewhat effective	Yes, the full cost is paid	0.8203
194	55-64	High school	White, Non-Hispanic	Male	$125,000 to $149,999	Married	Metro	Midwest	Not working - retired	Yes	Yes, every year	Less than $30	No, no effect	No, no effect	Protect myself	#NULL!	#NULL!	#NULL!	#NULL!	#NULL!	#NULL!	#NULL!	#NULL!	#NULL!	#NULL!	#NULL!		Yes	Somewhat effective	Don_t know	0.7502
195	45-54	High school	White, Non-Hispanic	Male	$125,000 to $149,999	Married	Metro	Northeast	Working - as a paid employee	Yes	Yes, every year	$0	No, no effect	No, no effect	Protect myself	#NULL!	#NULL!	#NULL!	#NULL!	#NULL!	#NULL!	#NULL!	#NULL!	#NULL!	#NULL!	#NULL!		Yes	Somewhat effective	Yes, the full cost is paid	0.8022
196	65-74	Bachelor_s degree or higher	White, Non-Hispanic	Male	$40,000 to $49,999	Married	Metro	Midwest	Not working - retired	Yes	Yes, every year	$0	Yes, more likely	Yes, more likely	Protect myself and others	#NULL!	#NULL!	#NULL!	#NULL!	#NULL!	#NULL!	#NULL!	#NULL!	#NULL!	#NULL!	#NULL!		Yes	Very effective	Yes, but only part of the cost is paid	0.5713
197	55-64	Bachelor_s degree or higher	White, Non-Hispanic	Male	$75,000 to $84,999	Divorced	Metro	South	Working - as a paid employee	No	No, never	#NULL!	#NULL!	#NULL!	#NULL!	No	No	No	No	Yes	No	No	No	No	No	No		Yes	Somewhat effective	Yes, the full cost is paid	0.8948
198	55-64	Some college	White, Non-Hispanic	Female	$15,000 to $19,999	Widowed	Metro	South	Working - self-employed	Yes	No, never	#NULL!	#NULL!	#NULL!	#NULL!	No	No	No	No	No	No	No	No	No	Yes	No	i never have and I_m not totally convinced it_s a good idea	No	Somewhat effective	#NULL!	0.6813
199	25-34	High school	White, Non-Hispanic	Male	Less than $5,000	Never married	Metro	West	Not working - looking for work	Yes	No, never	#NULL!	#NULL!	#NULL!	#NULL!	No	No	No	No	No	No	No	Yes	No	No	No		No	Don_t know	#NULL!	1.1447
200	75+	Bachelor_s degree or higher	White, Non-Hispanic	Male	$30,000 to $34,999	Widowed	Metro	Northeast	Not working - retired	Yes	Yes, every year	$0	No, no effect	No, no effect	Protect myself	#NULL!	#NULL!	#NULL!	#NULL!	#NULL!	#NULL!	#NULL!	#NULL!	#NULL!	#NULL!	#NULL!		Yes	Somewhat effective	Yes, the full cost is paid	0.5356
201	55-64	Some college	White, Non-Hispanic	Male	$100,000 to $124,999	Married	Non-Metro	West	Working - self-employed	Yes	Yes, every year	$0	No, no effect	No, no effect	Protect myself and others	#NULL!	#NULL!	#NULL!	#NULL!	#NULL!	#NULL!	#NULL!	#NULL!	#NULL!	#NULL!	#NULL!		Yes	Very effective	Yes, the full cost is paid	1.1521
202	45-54	Some college	White, Non-Hispanic	Male	$100,000 to $124,999	Married	Non-Metro	Midwest	Working - as a paid employee	Yes	No, never	#NULL!	#NULL!	#NULL!	#NULL!	No	No	No	No	No	No	No	Yes	No	No	No		Yes	Don_t know	Don_t know	0.7535
203	55-64	Some college	White, Non-Hispanic	Female	$100,000 to $124,999	Widowed	Metro	South	Working - as a paid employee	No	No, never	#NULL!	#NULL!	#NULL!	#NULL!	No	Yes	Yes	No	Yes	No	No	No	No	No	No		Yes	Not effective	Yes, the full cost is paid	1.2062
204	55-64	High school	White, Non-Hispanic	Female	$100,000 to $124,999	Married	Metro	Midwest	Not working - other	Yes	Yes, every year	$0	No, no effect	No, no effect	Protect myself and others	#NULL!	#NULL!	#NULL!	#NULL!	#NULL!	#NULL!	#NULL!	#NULL!	#NULL!	#NULL!	#NULL!		Yes	Somewhat effective	Yes, the full cost is paid	0.9014
205	55-64	Bachelor_s degree or higher	White, Non-Hispanic	Male	$150,000 to $174,999	Married	Metro	South	Working - self-employed	Yes	Yes, every year	Less than $30	Yes, more likely	Yes, more likely	Protect myself and others	#NULL!	#NULL!	#NULL!	#NULL!	#NULL!	#NULL!	#NULL!	#NULL!	#NULL!	#NULL!	#NULL!		Yes	Somewhat effective	Yes, the full cost is paid	0.6172
206	25-34	Some college	White, Non-Hispanic	Female	$60,000 to $74,999	Never married	Metro	Midwest	Working - as a paid employee	Yes	No, never	#NULL!	#NULL!	#NULL!	#NULL!	No	No	No	No	No	No	Yes	No	No	No	No		No	Somewhat effective	#NULL!	1.2032
207	25-34	Less than high school	Hispanic	Male	$7,500 to $9,999	Married	Metro	South	Not working - looking for work	Yes	Refused	#NULL!	#NULL!	#NULL!	#NULL!	#NULL!	#NULL!	#NULL!	#NULL!	#NULL!	#NULL!	#NULL!	#NULL!	#NULL!	#NULL!	#NULL!		Yes	Somewhat effective	Yes, but only part of the cost is paid	1.6332
208	75+	Some college	White, Non-Hispanic	Female	$25,000 to $29,999	Widowed	Metro	West	Not working - retired	No	Yes, every year	$0	Yes, more likely	Yes, more likely	Protect myself and others	#NULL!	#NULL!	#NULL!	#NULL!	#NULL!	#NULL!	#NULL!	#NULL!	#NULL!	#NULL!	#NULL!		Yes	Very effective	Yes, the full cost is paid	1.0288
209	45-54	Less than high school	White, Non-Hispanic	Male	$7,500 to $9,999	Divorced	Metro	Northeast	Not working - disabled	No	Yes, every year	$0	No, no effect	No, no effect	Protect myself	#NULL!	#NULL!	#NULL!	#NULL!	#NULL!	#NULL!	#NULL!	#NULL!	#NULL!	#NULL!	#NULL!		Yes	Very effective	Yes, the full cost is paid	1.3096
210	25-34	Bachelor_s degree or higher	White, Non-Hispanic	Female	$100,000 to $124,999	Never married	Metro	Midwest	Working - as a paid employee	Yes	Yes, some years	Less than $30	No, no effect	No, no effect	Protect myself and others	No	Yes	No	No	Yes	No	No	Yes	No	No	No		Yes	Somewhat effective	Don_t know	0.9871
211	55-64	Some college	White, Non-Hispanic	Female	$25,000 to $29,999	Divorced	Metro	South	Working - as a paid employee	No	No, never	#NULL!	#NULL!	#NULL!	#NULL!	No	Yes	No	No	No	No	No	No	No	No	No		Yes	Somewhat effective	Yes, the full cost is paid	1.1216
212	35-44	Bachelor_s degree or higher	White, Non-Hispanic	Male	$50,000 to $59,999	Married	Metro	South	Working - as a paid employee	Yes	No, never	#NULL!	#NULL!	#NULL!	#NULL!	No	No	No	No	No	No	Yes	No	No	No	No		Yes	It varies from season to season	Yes, the full cost is paid	0.7885
213	55-64	Bachelor_s degree or higher	White, Non-Hispanic	Male	$40,000 to $49,999	Married	Metro	Midwest	Working - self-employed	Yes	No, never	#NULL!	#NULL!	#NULL!	#NULL!	No	Yes	Yes	No	Yes	No	No	No	No	No	No		Yes	It varies from season to season	Don_t know	0.5713
214	45-54	Bachelor_s degree or higher	White, Non-Hispanic	Male	$175,000 or more	Married	Metro	South	Not working - retired	Yes	Yes, some years	Less than $30	Yes, more likely	No, less likely	Protect myself	Yes	No	No	No	No	No	No	No	No	No	No		No	Somewhat effective	#NULL!	0.7039
215	65-74	High school	White, Non-Hispanic	Female	$75,000 to $84,999	Widowed	Metro	South	Not working - retired	Yes	Yes, every year	$0	No, no effect	Yes, more likely	Protect myself and others	#NULL!	#NULL!	#NULL!	#NULL!	#NULL!	#NULL!	#NULL!	#NULL!	#NULL!	#NULL!	#NULL!		Yes	Somewhat effective	Yes, the full cost is paid	0.8539
216	45-54	Some college	White, Non-Hispanic	Male	$150,000 to $174,999	Married	Metro	West	Working - as a paid employee	Yes	No, never	#NULL!	#NULL!	#NULL!	#NULL!	No	No	Yes	No	Yes	No	No	No	No	No	No		Yes	Somewhat effective	Yes, the full cost is paid	0.7682
217	35-44	High school	Hispanic	Male	$75,000 to $84,999	Never married	Metro	Midwest	Working - as a paid employee	Yes	Yes, some years	$0	No, less likely	No, less likely	Protect myself and others	No	No	Yes	No	Yes	Yes	No	No	No	No	No		Yes	Somewhat effective	Yes, the full cost is paid	1.444
218	35-44	Bachelor_s degree or higher	Other, Non-Hispanic	Female	$125,000 to $149,999	Married	Metro	South	Working - as a paid employee	Yes	Yes, every year	$0	Yes, more likely	Yes, more likely	Protect myself and others	#NULL!	#NULL!	#NULL!	#NULL!	#NULL!	#NULL!	#NULL!	#NULL!	#NULL!	#NULL!	#NULL!		Yes	Somewhat effective	Yes, the full cost is paid	1.7034
219	65-74	Some college	White, Non-Hispanic	Male	$35,000 to $39,999	Married	Metro	South	Not working - retired	Yes	No, never	#NULL!	#NULL!	#NULL!	#NULL!	No	No	No	No	No	No	No	Yes	No	No	No		Yes	Don_t know	Don_t know	0.6827
220	25-34	Bachelor_s degree or higher	2+ Races, Non-Hispanic	Female	$125,000 to $149,999	Married	Metro	West	Working - as a paid employee	Yes	No, never	#NULL!	#NULL!	#NULL!	#NULL!	No	No	Yes	No	No	No	Yes	No	No	No	No		Yes	Somewhat effective	Don_t know	0.375
221	25-34	Bachelor_s degree or higher	White, Non-Hispanic	Female	$100,000 to $124,999	Married	Metro	Midwest	Working - as a paid employee	Yes	Yes, every year	$0	Yes, more likely	No, no effect	Protect myself and others	#NULL!	#NULL!	#NULL!	#NULL!	#NULL!	#NULL!	#NULL!	#NULL!	#NULL!	#NULL!	#NULL!		Yes	It varies from season to season	Yes, the full cost is paid	1.1482
222	35-44	Bachelor_s degree or higher	White, Non-Hispanic	Female	$150,000 to $174,999	Married	Metro	South	Not working - other	Yes	Yes, every year	$0	Yes, more likely	Yes, more likely	Protect myself and others	#NULL!	#NULL!	#NULL!	#NULL!	#NULL!	#NULL!	#NULL!	#NULL!	#NULL!	#NULL!	#NULL!		Yes	Very effective	Yes, the full cost is paid	0.9915
223	25-34	High school	White, Non-Hispanic	Male	$30,000 to $34,999	Never married	Metro	West	Working - as a paid employee	No	Yes, every year	Less than $30	Yes, more likely	Yes, more likely	Protect myself	#NULL!	#NULL!	#NULL!	#NULL!	#NULL!	#NULL!	#NULL!	#NULL!	#NULL!	#NULL!	#NULL!		Yes	Somewhat effective	Yes, the full cost is paid	1.8844
224	35-44	Bachelor_s degree or higher	White, Non-Hispanic	Female	$100,000 to $124,999	Married	Metro	Northeast	Working - self-employed	Yes	No, never	#NULL!	#NULL!	#NULL!	#NULL!	No	Yes	No	No	No	No	No	Yes	No	No	No		Yes	Not effective	Yes, the full cost is paid	0.9254
225	18-24	High school	White, Non-Hispanic	Female	$125,000 to $149,999	Never married	Metro	South	Not working - looking for work	Yes	No, never	#NULL!	#NULL!	#NULL!	#NULL!	No	No	No	No	Yes	No	No	No	No	No	No		Yes	Somewhat effective	Yes, but only part of the cost is paid	1.4083
226	45-54	Bachelor_s degree or higher	White, Non-Hispanic	Female	$100,000 to $124,999	Married	Metro	South	Working - as a paid employee	Yes	No, never	#NULL!	#NULL!	#NULL!	#NULL!	No	No	No	No	No	No	Yes	No	No	No	No		Yes	Somewhat effective	Yes, but only part of the cost is paid	0.7416
227	45-54	Bachelor_s degree or higher	White, Non-Hispanic	Female	$50,000 to $59,999	Never married	Non-Metro	South	Not working - looking for work	Yes	Yes, every year	Less than $30	No, no effect	No, no effect	Protect myself and others	#NULL!	#NULL!	#NULL!	#NULL!	#NULL!	#NULL!	#NULL!	#NULL!	#NULL!	#NULL!	#NULL!		Yes	It varies from season to season	Yes, but only part of the cost is paid	0.6389
228	55-64	Bachelor_s degree or higher	White, Non-Hispanic	Male	$175,000 or more	Married	Metro	South	Working - as a paid employee	Yes	Yes, every year	$0	Yes, more likely	No, no effect	Protect myself and others	#NULL!	#NULL!	#NULL!	#NULL!	#NULL!	#NULL!	#NULL!	#NULL!	#NULL!	#NULL!	#NULL!		Yes	Somewhat effective	Yes, the full cost is paid	0.7039
229	55-64	Some college	White, Non-Hispanic	Male	$100,000 to $124,999	Married	Metro	West	Working - as a paid employee	Yes	Yes, every year	$0	No, no effect	No, no effect	Protect myself	#NULL!	#NULL!	#NULL!	#NULL!	#NULL!	#NULL!	#NULL!	#NULL!	#NULL!	#NULL!	#NULL!		Yes	Somewhat effective	Yes, the full cost is paid	0.6736
230	55-64	Bachelor_s degree or higher	White, Non-Hispanic	Female	$175,000 or more	Married	Metro	South	Working - as a paid employee	Yes	Yes, every year	$0	No, no effect	No, no effect	Protect myself and others	#NULL!	#NULL!	#NULL!	#NULL!	#NULL!	#NULL!	#NULL!	#NULL!	#NULL!	#NULL!	#NULL!		Yes	Very effective	Yes, the full cost is paid	0.7416
231	75+	High school	White, Non-Hispanic	Male	$125,000 to $149,999	Widowed	Metro	West	Not working - retired	Yes	Yes, every year	$0	No, no effect	No, no effect	Protect myself and others	#NULL!	#NULL!	#NULL!	#NULL!	#NULL!	#NULL!	#NULL!	#NULL!	#NULL!	#NULL!	#NULL!		Yes	Very effective	Yes, the full cost is paid	0.6913
232	55-64	Some college	White, Non-Hispanic	Male	$40,000 to $49,999	Widowed	Metro	Midwest	Not working - retired	Yes	Yes, some years	Don_t know	Yes, more likely	Yes, more likely	Protect myself and others	No	No	No	No	No	No	No	Yes	No	No	No		Yes	Somewhat effective	Yes, but only part of the cost is paid	0.7752
233	65-74	High school	White, Non-Hispanic	Female	$40,000 to $49,999	Married	Metro	West	Not working - retired	Yes	No, never	#NULL!	#NULL!	#NULL!	#NULL!	No	No	Yes	No	No	No	No	No	No	No	No		Yes	Somewhat effective	Yes, but only part of the cost is paid	0.7283
234	18-24	Some college	White, Non-Hispanic	Male	$12,500 to $14,999	Living with partner	Metro	Midwest	Not working - looking for work	Yes	No, never	#NULL!	#NULL!	#NULL!	#NULL!	No	Yes	Yes	No	Yes	No	Yes	Yes	No	No	No		Yes	Not effective	Don_t know	1.2104
235	55-64	Less than high school	Hispanic	Male	$25,000 to $29,999	Divorced	Metro	Northeast	Not working - on temporary layoff from a job	No	No, never	#NULL!	#NULL!	#NULL!	#NULL!	No	No	No	No	No	No	Yes	No	No	No	No		Yes	Somewhat effective	Don_t know	1.73
236	18-24	Less than high school	White, Non-Hispanic	Male	$35,000 to $39,999	Never married	Metro	South	Not working - looking for work	Yes	No, never	#NULL!	#NULL!	#NULL!	#NULL!	No	No	No	No	No	No	No	No	No	Yes	No	don_t fucking care to	No	Don_t know	#NULL!	1.9486
237	65-74	Less than high school	White, Non-Hispanic	Female	$40,000 to $49,999	Married	Metro	Midwest	Not working - retired	Yes	Yes, every year	$0	No, less likely	No, less likely	Protect myself and others	#NULL!	#NULL!	#NULL!	#NULL!	#NULL!	#NULL!	#NULL!	#NULL!	#NULL!	#NULL!	#NULL!		Yes	Somewhat effective	Yes, the full cost is paid	1.087
238	75+	High school	White, Non-Hispanic	Female	$40,000 to $49,999	Married	Non-Metro	South	Not working - retired	No	No, never	#NULL!	#NULL!	#NULL!	#NULL!	No	No	Yes	No	No	No	No	No	No	No	No		Yes	Don_t know	Yes, the full cost is paid	1.126
239	55-64	High school	Hispanic	Female	$40,000 to $49,999	Married	Metro	Northeast	Working - as a paid employee	No	Yes, every year	$0	Yes, more likely	Yes, more likely	Protect myself and others	#NULL!	#NULL!	#NULL!	#NULL!	#NULL!	#NULL!	#NULL!	#NULL!	#NULL!	#NULL!	#NULL!		Yes	Somewhat effective	Don_t know	1.5115
240	55-64	Less than high school	White, Non-Hispanic	Male	$12,500 to $14,999	Widowed	Metro	South	Not working - retired	Yes	No, never	#NULL!	#NULL!	#NULL!	#NULL!	No	No	No	No	Yes	No	No	No	No	No	No		No	Not effective	#NULL!	0.8486
241	35-44	Some college	2+ Races, Non-Hispanic	Female	Less than $5,000	Never married	Metro	West	Working - self-employed	No	No, never	#NULL!	#NULL!	#NULL!	#NULL!	Yes	No	No	No	No	No	No	No	No	No	No		No	Don_t know	#NULL!	0.4553
242	55-64	High school	White, Non-Hispanic	Female	$60,000 to $74,999	Married	Metro	South	Not working - retired	Yes	Yes, every year	Don_t know	No, no effect	No, no effect	Protect myself and others	#NULL!	#NULL!	#NULL!	#NULL!	#NULL!	#NULL!	#NULL!	#NULL!	#NULL!	#NULL!	#NULL!		Yes	It varies from season to season	Yes, the full cost is paid	0.7521
243	18-24	Some college	White, Non-Hispanic	Male	$60,000 to $74,999	Married	Metro	West	Working - as a paid employee	Yes	Yes, some years	$0	Yes, more likely	No, less likely	Protect others	No	No	No	No	No	No	No	No	No	Yes	No	lazy	Yes	Don_t know	Don_t know	1.1997
244	55-64	Some college	White, Non-Hispanic	Female	$40,000 to $49,999	Married	Metro	West	Not working - retired	Yes	Yes, every year	$0	No, no effect	No, no effect	Protect myself	#NULL!	#NULL!	#NULL!	#NULL!	#NULL!	#NULL!	#NULL!	#NULL!	#NULL!	#NULL!	#NULL!		Yes	Very effective	Yes, the full cost is paid	0.7097
245	65-74	High school	White, Non-Hispanic	Female	$35,000 to $39,999	Divorced	Metro	Northeast	Not working - retired	No	Yes, every year	$0	No, no effect	No, no effect	Protect myself and others	#NULL!	#NULL!	#NULL!	#NULL!	#NULL!	#NULL!	#NULL!	#NULL!	#NULL!	#NULL!	#NULL!		Yes	Very effective	Yes, the full cost is paid	1.0743
246	35-44	Bachelor_s degree or higher	White, Non-Hispanic	Female	$60,000 to $74,999	Never married	Metro	West	Working - as a paid employee	Yes	No, never	#NULL!	#NULL!	#NULL!	#NULL!	No	No	Yes	No	No	No	No	Yes	No	No	No		Yes	Somewhat effective	Yes, the full cost is paid	0.8011
247	65-74	High school	White, Non-Hispanic	Male	$50,000 to $59,999	Married	Metro	Midwest	Working - as a paid employee	Yes	Yes, every year	$0	Yes, more likely	Yes, more likely	Protect myself and others	#NULL!	#NULL!	#NULL!	#NULL!	#NULL!	#NULL!	#NULL!	#NULL!	#NULL!	#NULL!	#NULL!		Yes	Very effective	Yes, the full cost is paid	0.6608
248	55-64	Bachelor_s degree or higher	White, Non-Hispanic	Male	$175,000 or more	Married	Non-Metro	South	Not working - retired	Yes	No, never	#NULL!	#NULL!	#NULL!	#NULL!	No	No	No	No	No	No	No	Yes	No	No	No		Yes	Somewhat effective	Yes, but only part of the cost is paid	0.6038
249	35-44	Less than high school	Hispanic	Male	$40,000 to $49,999	Living with partner	Metro	Midwest	Working - as a paid employee	Yes	No, never	#NULL!	#NULL!	#NULL!	#NULL!	No	No	No	No	No	No	Yes	No	No	No	No		Yes	Somewhat effective	Don_t know	1.8463
250	75+	Less than high school	Black, Non-Hispanic	Female	$175,000 or more	Widowed	Metro	South	Not working - retired	Yes	Yes, every year	$0	Yes, more likely	Yes, more likely	Protect myself	#NULL!	#NULL!	#NULL!	#NULL!	#NULL!	#NULL!	#NULL!	#NULL!	#NULL!	#NULL!	#NULL!		Yes	Don_t know	Yes, the full cost is paid	1.5918
251	45-54	Some college	White, Non-Hispanic	Male	$15,000 to $19,999	Married	Non-Metro	Midwest	Working - as a paid employee	No	No, never	#NULL!	#NULL!	#NULL!	#NULL!	No	Yes	No	No	No	No	No	Yes	No	No	No		Yes	Don_t know	Don_t know	0.8945
252	18-24	Some college	White, Non-Hispanic	Male	$50,000 to $59,999	Never married	Metro	South	Working - as a paid employee	Yes	Yes, every year	$0	No, no effect	Yes, more likely	Protect others	#NULL!	#NULL!	#NULL!	#NULL!	#NULL!	#NULL!	#NULL!	#NULL!	#NULL!	#NULL!	#NULL!		Yes	Very effective	Yes, the full cost is paid	1.3079
253	55-64	Bachelor_s degree or higher	White, Non-Hispanic	Male	$100,000 to $124,999	Married	Metro	Midwest	Not working - retired	Yes	Yes, every year	$0	No, no effect	Yes, more likely	Protect myself and others	#NULL!	#NULL!	#NULL!	#NULL!	#NULL!	#NULL!	#NULL!	#NULL!	#NULL!	#NULL!	#NULL!		Yes	Somewhat effective	Yes, the full cost is paid	0.6144
254	35-44	Bachelor_s degree or higher	White, Non-Hispanic	Male	$175,000 or more	Married	Metro	South	Working - as a paid employee	No	Yes, every year	$0	No, no effect	No, no effect	Protect myself and others	#NULL!	#NULL!	#NULL!	#NULL!	#NULL!	#NULL!	#NULL!	#NULL!	#NULL!	#NULL!	#NULL!		Yes	Somewhat effective	Don_t know	1.2979
255	45-54	Some college	White, Non-Hispanic	Female	$30,000 to $34,999	Divorced	Metro	Midwest	Not working - other	Yes	Yes, every year	$0	No, no effect	No, no effect	Protect myself and others	#NULL!	#NULL!	#NULL!	#NULL!	#NULL!	#NULL!	#NULL!	#NULL!	#NULL!	#NULL!	#NULL!		Yes	It varies from season to season	Yes, the full cost is paid	0.8166
256	45-54	High school	White, Non-Hispanic	Female	$7,500 to $9,999	Never married	Metro	West	Not working - other	No	No, never	#NULL!	#NULL!	#NULL!	#NULL!	No	Yes	Yes	No	Yes	Yes	No	No	No	No	No		Yes	Not effective	Don_t know	0.986
257	65-74	High school	White, Non-Hispanic	Female	$25,000 to $29,999	Divorced	Metro	Midwest	Not working - retired	Yes	No, never	#NULL!	#NULL!	#NULL!	#NULL!	No	Yes	No	No	Yes	Yes	No	No	No	No	No		Yes	Don_t know	Don_t know	0.7904
258	55-64	Bachelor_s degree or higher	Other, Non-Hispanic	Male	$150,000 to $174,999	Never married	Metro	West	Not working - looking for work	Yes	Yes, some years	$30 to $60	No, no effect	No, no effect	Protect myself	No	Yes	No	No	No	No	No	No	No	No	No		Yes	It varies from season to season	Don_t know	0.9726
259	45-54	High school	White, Non-Hispanic	Male	$75,000 to $84,999	Married	Metro	Northeast	Working - as a paid employee	Yes	No, never	#NULL!	#NULL!	#NULL!	#NULL!	No	No	Yes	No	No	No	No	No	No	No	No		Yes	Somewhat effective	Yes, the full cost is paid	0.8022
260	45-54	Some college	Hispanic	Male	$50,000 to $59,999	Divorced	Metro	West	Working - self-employed	Yes	No, never	#NULL!	#NULL!	#NULL!	#NULL!	No	No	No	No	No	No	No	No	No	Yes	No	I didn_t know a vaccine was available	Yes	Don_t know	Don_t know	0.8978
261	75+	High school	White, Non-Hispanic	Male	$25,000 to $29,999	Married	Non-Metro	West	Not working - retired	Yes	Yes, every year	Less than $30	No, no effect	No, no effect	Protect myself	#NULL!	#NULL!	#NULL!	#NULL!	#NULL!	#NULL!	#NULL!	#NULL!	#NULL!	#NULL!	#NULL!		Yes	It varies from season to season	Don_t know	1.0994
262	35-44	Bachelor_s degree or higher	White, Non-Hispanic	Male	$100,000 to $124,999	Married	Metro	Midwest	Working - as a paid employee	Yes	Yes, every year	$0	No, no effect	No, no effect	Protect myself and others	#NULL!	#NULL!	#NULL!	#NULL!	#NULL!	#NULL!	#NULL!	#NULL!	#NULL!	#NULL!	#NULL!		Yes	Somewhat effective	Yes, the full cost is paid	0.8913
263	65-74	High school	White, Non-Hispanic	Male	$30,000 to $34,999	Married	Metro	West	Working - as a paid employee	Yes	Yes, every year	$0	No, no effect	No, no effect	Protect myself and others	#NULL!	#NULL!	#NULL!	#NULL!	#NULL!	#NULL!	#NULL!	#NULL!	#NULL!	#NULL!	#NULL!		Yes	Very effective	Yes, the full cost is paid	0.6428
264	55-64	High school	White, Non-Hispanic	Female	$35,000 to $39,999	Married	Non-Metro	Northeast	Working - as a paid employee	Yes	Yes, every year	$0	No, no effect	No, no effect	Protect myself and others	#NULL!	#NULL!	#NULL!	#NULL!	#NULL!	#NULL!	#NULL!	#NULL!	#NULL!	#NULL!	#NULL!		Yes	Somewhat effective	Yes, the full cost is paid	0.6874
265	25-34	Bachelor_s degree or higher	Other, Non-Hispanic	Male	$100,000 to $124,999	Married	Metro	West	Working - as a paid employee	Yes	No, never	#NULL!	#NULL!	#NULL!	#NULL!	No	Yes	No	No	No	No	Yes	No	No	No	No		Yes	It varies from season to season	Don_t know	1.4108
266	25-34	Some college	White, Non-Hispanic	Male	$50,000 to $59,999	Married	Metro	South	Working - as a paid employee	Yes	Refused	#NULL!	#NULL!	#NULL!	#NULL!	#NULL!	#NULL!	#NULL!	#NULL!	#NULL!	#NULL!	#NULL!	#NULL!	#NULL!	#NULL!	#NULL!		Refused	Don_t know	#NULL!	0.9381
267	45-54	High school	White, Non-Hispanic	Male	$100,000 to $124,999	Married	Metro	South	Working - as a paid employee	Yes	Yes, every year	$0	Yes, more likely	Yes, more likely	Protect myself and others	#NULL!	#NULL!	#NULL!	#NULL!	#NULL!	#NULL!	#NULL!	#NULL!	#NULL!	#NULL!	#NULL!		Yes	Very effective	Yes, the full cost is paid	0.8595
268	65-74	Some college	Other, Non-Hispanic	Male	$35,000 to $39,999	Divorced	Non-Metro	Midwest	Working - as a paid employee	No	Yes, every year	$0	No, no effect	No, no effect	Protect myself and others	#NULL!	#NULL!	#NULL!	#NULL!	#NULL!	#NULL!	#NULL!	#NULL!	#NULL!	#NULL!	#NULL!		Yes	It varies from season to season	Yes, the full cost is paid	1.5299
269	65-74	High school	White, Non-Hispanic	Male	$60,000 to $74,999	Married	Metro	West	Not working - retired	Yes	Yes, every year	$0	Yes, more likely	Yes, more likely	Protect myself and others	#NULL!	#NULL!	#NULL!	#NULL!	#NULL!	#NULL!	#NULL!	#NULL!	#NULL!	#NULL!	#NULL!		Yes	Somewhat effective	Yes, the full cost is paid	0.6089
270	18-24	High school	2+ Races, Non-Hispanic	Male	$125,000 to $149,999	Never married	Metro	South	Working - self-employed	Yes	Yes, every year	$0	Yes, more likely	Yes, more likely	Protect myself	#NULL!	#NULL!	#NULL!	#NULL!	#NULL!	#NULL!	#NULL!	#NULL!	#NULL!	#NULL!	#NULL!		Yes	Very effective	Yes, the full cost is paid	0.5402
271	25-34	Less than high school	White, Non-Hispanic	Female	Less than $5,000	Never married	Metro	South	Not working - other	Yes	Yes, every year	$0	No, no effect	No, no effect	Protect myself and others	#NULL!	#NULL!	#NULL!	#NULL!	#NULL!	#NULL!	#NULL!	#NULL!	#NULL!	#NULL!	#NULL!		No	Somewhat effective	#NULL!	1.5858
272	35-44	Bachelor_s degree or higher	White, Non-Hispanic	Female	$125,000 to $149,999	Married	Metro	South	Not working - other	Yes	Yes, some years	Less than $30	No, no effect	No, no effect	Protect myself and others	No	No	No	No	No	No	No	Yes	No	No	No		Yes	Somewhat effective	Yes, the full cost is paid	0.9915
273	25-34	Some college	White, Non-Hispanic	Male	$15,000 to $19,999	Never married	Metro	South	Not working - on temporary layoff from a job	No	Refused	#NULL!	#NULL!	#NULL!	#NULL!	#NULL!	#NULL!	#NULL!	#NULL!	#NULL!	#NULL!	#NULL!	#NULL!	#NULL!	#NULL!	#NULL!		Refused	Refused	#NULL!	1.2644
274	25-34	Some college	Hispanic	Male	$75,000 to $84,999	Divorced	Metro	South	Working - as a paid employee	Yes	No, never	#NULL!	#NULL!	#NULL!	#NULL!	No	Yes	No	No	No	No	No	No	No	No	No		Yes	Not effective	Don_t know	1.9702
275	55-64	High school	White, Non-Hispanic	Male	$35,000 to $39,999	Married	Non-Metro	Northeast	Working - as a paid employee	Yes	No, never	#NULL!	#NULL!	#NULL!	#NULL!	No	Yes	Yes	No	Yes	No	No	No	No	No	No		Yes	Somewhat effective	Yes, the full cost is paid	0.6525
276	35-44	High school	Hispanic	Male	$40,000 to $49,999	Married	Metro	South	Working - as a paid employee	Yes	No, never	#NULL!	#NULL!	#NULL!	#NULL!	No	No	No	No	Yes	No	No	No	No	No	No		Yes	Somewhat effective	Yes, the full cost is paid	1.3486
277	18-24	Less than high school	Hispanic	Male	$5,000 to $7,499	Never married	Metro	South	Working - self-employed	No	No, never	#NULL!	#NULL!	#NULL!	#NULL!	Yes	No	No	No	No	No	No	No	No	No	No		No	Don_t know	#NULL!	2.5953
278	18-24	High school	White, Non-Hispanic	Female	$125,000 to $149,999	Never married	Metro	Midwest	Not working - looking for work	Yes	Yes, every year	$0	No, no effect	No, no effect	Protect myself and others	#NULL!	#NULL!	#NULL!	#NULL!	#NULL!	#NULL!	#NULL!	#NULL!	#NULL!	#NULL!	#NULL!		Yes	Very effective	Yes, the full cost is paid	1.402
279	45-54	Bachelor_s degree or higher	White, Non-Hispanic	Male	$85,000 to $99,999	Married	Non-Metro	Midwest	Working - as a paid employee	Yes	Yes, every year	$0	Yes, more likely	Yes, more likely	Protect myself	#NULL!	#NULL!	#NULL!	#NULL!	#NULL!	#NULL!	#NULL!	#NULL!	#NULL!	#NULL!	#NULL!		Yes	Somewhat effective	Yes, the full cost is paid	0.6334
280	75+	Bachelor_s degree or higher	White, Non-Hispanic	Male	$25,000 to $29,999	Never married	Metro	Midwest	Not working - retired	Yes	Yes, every year	$0	No, no effect	No, no effect	Protect myself	#NULL!	#NULL!	#NULL!	#NULL!	#NULL!	#NULL!	#NULL!	#NULL!	#NULL!	#NULL!	#NULL!		Yes	Somewhat effective	Yes, the full cost is paid	0.5713
281	55-64	Less than high school	White, Non-Hispanic	Female	$7,500 to $9,999	Separated	Non-Metro	South	Not working - disabled	No	Yes, every year	$0	Yes, more likely	Yes, more likely	Protect myself and others	#NULL!	#NULL!	#NULL!	#NULL!	#NULL!	#NULL!	#NULL!	#NULL!	#NULL!	#NULL!	#NULL!		Yes	Very effective	Yes, the full cost is paid	1.446
282	55-64	Bachelor_s degree or higher	White, Non-Hispanic	Female	$100,000 to $124,999	Married	Metro	Northeast	Working - as a paid employee	No	Yes, some years	$0	Yes, more likely	Yes, more likely	Protect myself and others	No	No	No	No	Yes	Yes	No	Yes	No	No	No		Yes	Somewhat effective	Yes, the full cost is paid	0.9463
283	35-44	Some college	White, Non-Hispanic	Male	$60,000 to $74,999	Married	Metro	Northeast	Working - as a paid employee	Yes	No, never	#NULL!	#NULL!	#NULL!	#NULL!	No	No	No	No	Yes	No	No	No	No	No	No		No	It varies from season to season	#NULL!	0.8756
284	18-24	Less than high school	Hispanic	Male	$50,000 to $59,999	Separated	Metro	West	Working - as a paid employee	Yes	Yes, some years	$0	No, no effect	No, no effect	Protect myself and others	Yes	Yes	No	No	No	No	No	No	No	No	No		Yes	Somewhat effective	Yes, the full cost is paid	2.2467
285	65-74	Some college	White, Non-Hispanic	Female	$25,000 to $29,999	Widowed	Metro	South	Not working - retired	No	Yes, every year	$0	No, no effect	No, no effect	Protect myself	#NULL!	#NULL!	#NULL!	#NULL!	#NULL!	#NULL!	#NULL!	#NULL!	#NULL!	#NULL!	#NULL!		Yes	Very effective	Yes, the full cost is paid	1.1216
286	55-64	Bachelor_s degree or higher	White, Non-Hispanic	Female	$60,000 to $74,999	Married	Metro	South	Not working - other	Yes	No, never	#NULL!	#NULL!	#NULL!	#NULL!	No	No	No	No	No	No	No	No	No	No	Yes		Yes	It varies from season to season	Don_t know	0.6532
287	65-74	Bachelor_s degree or higher	White, Non-Hispanic	Male	$85,000 to $99,999	Married	Metro	South	Not working - retired	Yes	Yes, every year	Less than $30	No, no effect	No, no effect	Protect myself and others	#NULL!	#NULL!	#NULL!	#NULL!	#NULL!	#NULL!	#NULL!	#NULL!	#NULL!	#NULL!	#NULL!		Yes	Somewhat effective	Yes, the full cost is paid	0.6172
288	25-34	Bachelor_s degree or higher	White, Non-Hispanic	Female	$15,000 to $19,999	Never married	Metro	South	Working - as a paid employee	Yes	No, never	#NULL!	#NULL!	#NULL!	#NULL!	No	No	No	No	No	No	No	No	No	Yes	No	unnatural	Yes	It varies from season to season	Don_t know	0.9444
289	35-44	Bachelor_s degree or higher	White, Non-Hispanic	Female	$75,000 to $84,999	Married	Metro	West	Working - as a paid employee	Yes	Yes, some years	$30 to $60	Yes, more likely	No, less likely	Protect myself	No	No	No	No	No	No	No	Yes	No	No	No		Yes	Somewhat effective	Yes, but only part of the cost is paid	0.9096
290	55-64	Some college	Other, Non-Hispanic	Male	$12,500 to $14,999	Married	Metro	South	Not working - disabled	Yes	Yes, every year	$0	Yes, more likely	Yes, more likely	Protect myself	#NULL!	#NULL!	#NULL!	#NULL!	#NULL!	#NULL!	#NULL!	#NULL!	#NULL!	#NULL!	#NULL!		Yes	Very effective	Yes, the full cost is paid	1.0329
291	25-34	Bachelor_s degree or higher	White, Non-Hispanic	Female	$100,000 to $124,999	Married	Metro	South	Working - as a paid employee	Yes	Yes, every year	$0	No, no effect	Yes, more likely	Protect myself and others	#NULL!	#NULL!	#NULL!	#NULL!	#NULL!	#NULL!	#NULL!	#NULL!	#NULL!	#NULL!	#NULL!		Yes	It varies from season to season	Yes, the full cost is paid	0.9915
292	35-44	Bachelor_s degree or higher	White, Non-Hispanic	Male	$60,000 to $74,999	Divorced	Metro	South	Working - as a paid employee	Yes	Yes, every year	$0	No, no effect	No, no effect	Protect myself	#NULL!	#NULL!	#NULL!	#NULL!	#NULL!	#NULL!	#NULL!	#NULL!	#NULL!	#NULL!	#NULL!		Yes	Very effective	Yes, the full cost is paid	0.7885
293	25-34	Less than high school	Hispanic	Female	$85,000 to $99,999	Married	Metro	South	Not working - other	Yes	Yes, every year	$0	Yes, more likely	No, less likely	Protect myself and others	#NULL!	#NULL!	#NULL!	#NULL!	#NULL!	#NULL!	#NULL!	#NULL!	#NULL!	#NULL!	#NULL!		Yes	Very effective	Yes, the full cost is paid	2.2091
294	65-74	Some college	Black, Non-Hispanic	Female	$60,000 to $74,999	Divorced	Metro	South	Not working - retired	Yes	Yes, every year	$0	No, no effect	No, no effect	Protect myself	#NULL!	#NULL!	#NULL!	#NULL!	#NULL!	#NULL!	#NULL!	#NULL!	#NULL!	#NULL!	#NULL!		Yes	Somewhat effective	Yes, the full cost is paid	0.9934
295	25-34	High school	White, Non-Hispanic	Male	$25,000 to $29,999	Living with partner	Metro	South	Working - as a paid employee	Yes	No, never	#NULL!	#NULL!	#NULL!	#NULL!	No	No	No	No	No	No	Yes	No	No	No	No		Yes	Somewhat effective	Don_t know	1.0164
296	25-34	Bachelor_s degree or higher	White, Non-Hispanic	Female	$100,000 to $124,999	Married	Metro	Northeast	Working - as a paid employee	Yes	Yes, every year	$0	No, no effect	No, no effect	Protect myself	#NULL!	#NULL!	#NULL!	#NULL!	#NULL!	#NULL!	#NULL!	#NULL!	#NULL!	#NULL!	#NULL!		Yes	Somewhat effective	Yes, the full cost is paid	1.0765
297	35-44	Bachelor_s degree or higher	Other, Non-Hispanic	Female	$100,000 to $124,999	Married	Metro	West	Working - as a paid employee	Yes	Yes, every year	Don_t know	No, no effect	No, no effect	Protect myself and others	#NULL!	#NULL!	#NULL!	#NULL!	#NULL!	#NULL!	#NULL!	#NULL!	#NULL!	#NULL!	#NULL!		Yes	Don_t know	Don_t know	1.5626
298	45-54	Bachelor_s degree or higher	White, Non-Hispanic	Male	$150,000 to $174,999	Married	Metro	South	Working - as a paid employee	Yes	Yes, some years	$0	Yes, more likely	No, no effect	Protect myself and others	No	No	Yes	No	No	No	Yes	Yes	No	No	No		Yes	Very effective	Yes, the full cost is paid	0.7039
299	55-64	High school	White, Non-Hispanic	Female	$60,000 to $74,999	Married	Metro	South	Working - self-employed	Yes	No, never	#NULL!	#NULL!	#NULL!	#NULL!	No	No	No	No	Yes	Yes	Yes	No	No	Yes	No	they do not help	No	Not effective	#NULL!	0.7975
300	35-44	Some college	White, Non-Hispanic	Male	$12,500 to $14,999	Divorced	Metro	West	Working - as a paid employee	Yes	No, never	#NULL!	#NULL!	#NULL!	#NULL!	Yes	No	No	No	No	No	No	No	No	No	No		No	Not effective	#NULL!	0.8
301	55-64	Some college	White, Non-Hispanic	Male	$150,000 to $174,999	Married	Metro	West	Working - self-employed	Yes	No, never	#NULL!	#NULL!	#NULL!	#NULL!	No	No	No	No	No	No	No	No	No	Yes	No	Religious resons	No	Not effective	#NULL!	0.6736
302	55-64	Some college	White, Non-Hispanic	Female	$100,000 to $124,999	Married	Metro	Midwest	Not working - retired	Yes	Yes, every year	$0	No, no effect	No, no effect	Protect myself and others	#NULL!	#NULL!	#NULL!	#NULL!	#NULL!	#NULL!	#NULL!	#NULL!	#NULL!	#NULL!	#NULL!		Yes	Somewhat effective	Yes, but only part of the cost is paid	0.8283
303	75+	Bachelor_s degree or higher	White, Non-Hispanic	Male	$100,000 to $124,999	Married	Metro	West	Not working - retired	Yes	Yes, every year	$0	No, no effect	No, no effect	Protect myself and others	#NULL!	#NULL!	#NULL!	#NULL!	#NULL!	#NULL!	#NULL!	#NULL!	#NULL!	#NULL!	#NULL!		Yes	Somewhat effective	Yes, the full cost is paid	0.5662
304	18-24	High school	White, Non-Hispanic	Male	$60,000 to $74,999	Never married	Metro	Midwest	Not working - looking for work	Yes	Yes, every year	Less than $30	No, no effect	No, no effect	Protect myself and others	#NULL!	#NULL!	#NULL!	#NULL!	#NULL!	#NULL!	#NULL!	#NULL!	#NULL!	#NULL!	#NULL!		Yes	Somewhat effective	Yes, the full cost is paid	1.3363
305	65-74	High school	White, Non-Hispanic	Female	$50,000 to $59,999	Married	Non-Metro	Northeast	Not working - retired	Yes	No, never	#NULL!	#NULL!	#NULL!	#NULL!	No	No	Yes	No	Yes	No	No	No	No	No	No		Yes	It varies from season to season	Don_t know	0.6141
306	18-24	Some college	White, Non-Hispanic	Male	$175,000 or more	Never married	Metro	Northeast	Not working - looking for work	Yes	Yes, every year	$0	Yes, more likely	Yes, more likely	Protect myself and others	#NULL!	#NULL!	#NULL!	#NULL!	#NULL!	#NULL!	#NULL!	#NULL!	#NULL!	#NULL!	#NULL!		Yes	Very effective	Yes, the full cost is paid	1.3859
307	55-64	High school	White, Non-Hispanic	Female	$30,000 to $34,999	Divorced	Metro	Midwest	Working - as a paid employee	Yes	Yes, every year	$0	No, no effect	No, no effect	Protect myself and others	#NULL!	#NULL!	#NULL!	#NULL!	#NULL!	#NULL!	#NULL!	#NULL!	#NULL!	#NULL!	#NULL!		Yes	Somewhat effective	Yes, the full cost is paid	0.7904
308	45-54	High school	White, Non-Hispanic	Female	$50,000 to $59,999	Married	Metro	Midwest	Working - as a paid employee	No	Yes, some years	$0	Yes, more likely	Refused	Protect myself and others	No	No	No	No	No	No	Yes	No	No	No	No		Yes	Very effective	Refused	1.1511
309	45-54	Bachelor_s degree or higher	Other, Non-Hispanic	Male	$175,000 or more	Divorced	Metro	West	Not working - disabled	Yes	Yes, some years	Less than $30	Yes, more likely	No, less likely	Protect myself	No	No	Yes	No	No	No	No	No	No	No	No		Yes	Somewhat effective	Yes, but only part of the cost is paid	1.1093
310	75+	High school	White, Non-Hispanic	Female	$40,000 to $49,999	Married	Non-Metro	South	Not working - retired	Yes	Yes, every year	$0	No, no effect	No, no effect	Protect myself and others	#NULL!	#NULL!	#NULL!	#NULL!	#NULL!	#NULL!	#NULL!	#NULL!	#NULL!	#NULL!	#NULL!		Yes	Very effective	Yes, the full cost is paid	0.7767
311	45-54	High school	White, Non-Hispanic	Male	$10,000 to $12,499	Married	Metro	South	Not working - looking for work	Yes	Yes, every year	Less than $30	No, no effect	No, no effect	Protect myself and others	#NULL!	#NULL!	#NULL!	#NULL!	#NULL!	#NULL!	#NULL!	#NULL!	#NULL!	#NULL!	#NULL!		Yes	Somewhat effective	Yes, the full cost is paid	0.7038
312	55-64	High school	White, Non-Hispanic	Female	$60,000 to $74,999	Married	Metro	Northeast	Not working - retired	Yes	No, never	#NULL!	#NULL!	#NULL!	#NULL!	No	No	No	No	No	No	Yes	No	No	No	No		Yes	Don_t know	Don_t know	0.7444
313	45-54	Some college	White, Non-Hispanic	Male	$100,000 to $124,999	Married	Metro	West	Working - self-employed	Yes	Yes, every year	$0	No, no effect	No, no effect	Protect myself and others	#NULL!	#NULL!	#NULL!	#NULL!	#NULL!	#NULL!	#NULL!	#NULL!	#NULL!	#NULL!	#NULL!		Yes	It varies from season to season	Yes, the full cost is paid	0.7682
314	75+	Some college	White, Non-Hispanic	Female	$20,000 to $24,999	Widowed	Metro	South	Not working - retired	Yes	Yes, every year	$0	No, no effect	Refused	Protect myself and others	#NULL!	#NULL!	#NULL!	#NULL!	#NULL!	#NULL!	#NULL!	#NULL!	#NULL!	#NULL!	#NULL!		Yes	Very effective	Yes, the full cost is paid	0.6813
315	45-54	High school	2+ Races, Non-Hispanic	Male	$50,000 to $59,999	Married	Metro	South	Working - as a paid employee	Yes	No, never	#NULL!	#NULL!	#NULL!	#NULL!	No	No	No	No	No	No	Yes	No	No	No	No		Yes	Don_t know	Don_t know	0.2705
316	65-74	Some college	White, Non-Hispanic	Male	$60,000 to $74,999	Married	Metro	South	Not working - retired	Yes	No, never	#NULL!	#NULL!	#NULL!	#NULL!	Yes	No	No	No	No	No	No	No	No	No	No		Yes	It varies from season to season	No	0.6467
317	55-64	Some college	Black, Non-Hispanic	Female	$35,000 to $39,999	Divorced	Metro	Northeast	Working - as a paid employee	Yes	Yes, every year	$30 to $60	Yes, more likely	Yes, more likely	Protect myself	#NULL!	#NULL!	#NULL!	#NULL!	#NULL!	#NULL!	#NULL!	#NULL!	#NULL!	#NULL!	#NULL!		Yes	Very effective	Yes, the full cost is paid	1.0378
318	55-64	High school	White, Non-Hispanic	Male	$100,000 to $124,999	Married	Metro	Midwest	Working - as a paid employee	Yes	Yes, every year	Less than $30	No, no effect	No, no effect	Protect myself	#NULL!	#NULL!	#NULL!	#NULL!	#NULL!	#NULL!	#NULL!	#NULL!	#NULL!	#NULL!	#NULL!		Yes	Very effective	Yes, the full cost is paid	0.7502
319	55-64	High school	Hispanic	Female	$60,000 to $74,999	Married	Metro	South	Working - as a paid employee	Yes	Yes, some years	$0	No, no effect	No, no effect	Protect myself and others	No	Yes	No	No	No	No	No	No	No	No	No		Yes	Somewhat effective	Yes, the full cost is paid	0.998
320	55-64	High school	White, Non-Hispanic	Male	$20,000 to $24,999	Divorced	Metro	Midwest	Working - self-employed	Yes	Yes, some years	Less than $30	No, no effect	No, no effect	Protect myself	No	Yes	No	No	Yes	No	No	Yes	No	No	No		Yes	Somewhat effective	Yes, but only part of the cost is paid	0.6143
321	45-54	Some college	White, Non-Hispanic	Female	$75,000 to $84,999	Married	Metro	South	Not working - other	Yes	Yes, some years	$0	No, no effect	Yes, more likely	Protect myself and others	No	No	No	No	No	No	No	Yes	No	No	No		Yes	It varies from season to season	Yes, the full cost is paid	0.8822
322	65-74	High school	White, Non-Hispanic	Male	$50,000 to $59,999	Divorced	Metro	South	Working - self-employed	Yes	No, never	#NULL!	#NULL!	#NULL!	#NULL!	No	No	No	No	No	No	Yes	Yes	No	No	No		Yes	Somewhat effective	Yes, but only part of the cost is paid	0.6638
323	55-64	Some college	Hispanic	Female	$75,000 to $84,999	Separated	Metro	West	Not working - retired	Yes	Yes, every year	$0	Yes, more likely	No, no effect	Protect myself	#NULL!	#NULL!	#NULL!	#NULL!	#NULL!	#NULL!	#NULL!	#NULL!	#NULL!	#NULL!	#NULL!		Yes	Somewhat effective	Yes, the full cost is paid	1.0127
324	55-64	Bachelor_s degree or higher	White, Non-Hispanic	Male	$125,000 to $149,999	Divorced	Metro	Midwest	Not working - retired	Yes	No, never	#NULL!	#NULL!	#NULL!	#NULL!	No	No	No	No	No	No	No	No	No	Yes	No	I don_t trust the vaccine	No	It varies from season to season	#NULL!	0.6144
325	55-64	High school	White, Non-Hispanic	Male	$100,000 to $124,999	Married	Metro	South	Not working - retired	Yes	No, never	#NULL!	#NULL!	#NULL!	#NULL!	No	Yes	No	No	No	No	No	No	No	No	No		Yes	It varies from season to season	Don_t know	0.7536
326	65-74	Bachelor_s degree or higher	Other, Non-Hispanic	Male	$12,500 to $14,999	Divorced	Metro	West	Not working - retired	Yes	Yes, some years	$0	Yes, more likely	No, less likely	Protect others	No	No	No	No	No	No	No	No	No	Yes	No	vaccines may reduce one_s immunity	Yes	It varies from season to season	Yes, the full cost is paid	0.7964
327	45-54	Bachelor_s degree or higher	White, Non-Hispanic	Male	$100,000 to $124,999	Married	Metro	South	Working - as a paid employee	Yes	Yes, some years	$0	Yes, more likely	No, no effect	Protect myself	No	No	Yes	No	No	No	No	Yes	No	No	No		Yes	It varies from season to season	Yes, the full cost is paid	0.7039
329	75+	High school	White, Non-Hispanic	Female	$35,000 to $39,999	Widowed	Metro	South	Not working - retired	Yes	Yes, every year	$0	No, no effect	Yes, more likely	Protect myself and others	#NULL!	#NULL!	#NULL!	#NULL!	#NULL!	#NULL!	#NULL!	#NULL!	#NULL!	#NULL!	#NULL!		Yes	It varies from season to season	Yes, the full cost is paid	0.794
330	55-64	Some college	White, Non-Hispanic	Male	$60,000 to $74,999	Married	Metro	West	Working - as a paid employee	Yes	Yes, some years	$0	No, no effect	No, no effect	Protect myself	No	No	No	No	No	No	No	Yes	No	No	No		Yes	Very effective	Yes, the full cost is paid	0.6766
331	45-54	Bachelor_s degree or higher	White, Non-Hispanic	Male	$175,000 or more	Married	Metro	South	Working - as a paid employee	Yes	Yes, some years	Less than $30	No, no effect	No, no effect	Protect myself	No	Yes	Yes	No	No	No	No	No	No	No	No		Yes	It varies from season to season	Yes, but only part of the cost is paid	0.7039
332	35-44	Less than high school	White, Non-Hispanic	Male	$12,500 to $14,999	Living with partner	Metro	West	Not working - other	Yes	Yes, some years	$0	Yes, more likely	No, less likely	Protect myself	No	No	No	No	No	No	No	No	No	Yes	No	Dont like idea of getting little bit of virus injected in me is only way to build immuninities.	Yes	Somewhat effective	Yes, the full cost is paid	1.1291
333	55-64	Bachelor_s degree or higher	White, Non-Hispanic	Male	$85,000 to $99,999	Married	Metro	Midwest	Not working - retired	Yes	No, never	#NULL!	#NULL!	#NULL!	#NULL!	No	No	No	No	No	No	No	Yes	No	No	No		Yes	It varies from season to season	Don_t know	0.6144
334	35-44	Less than high school	2+ Races, Non-Hispanic	Male	$35,000 to $39,999	Never married	Metro	South	Not working - disabled	Yes	No, never	#NULL!	#NULL!	#NULL!	#NULL!	No	Yes	No	No	No	No	No	No	No	No	No		No	Not effective	#NULL!	0.4954
335	45-54	Bachelor_s degree or higher	White, Non-Hispanic	Male	$100,000 to $124,999	Never married	Metro	South	Working - as a paid employee	Yes	No, never	#NULL!	#NULL!	#NULL!	#NULL!	No	No	No	No	No	No	Yes	No	No	No	No		Yes	Somewhat effective	Don_t know	0.7039
336	55-64	Bachelor_s degree or higher	White, Non-Hispanic	Male	$60,000 to $74,999	Married	Non-Metro	Midwest	Not working - disabled	Yes	Yes, every year	Don_t know	Yes, more likely	No, no effect	Protect myself and others	#NULL!	#NULL!	#NULL!	#NULL!	#NULL!	#NULL!	#NULL!	#NULL!	#NULL!	#NULL!	#NULL!		Yes	It varies from season to season	Don_t know	0.4891
337	45-54	Less than high school	Hispanic	Male	$125,000 to $149,999	Divorced	Metro	South	Not working - disabled	Yes	Yes, every year	$0	Yes, more likely	Yes, more likely	Protect myself	#NULL!	#NULL!	#NULL!	#NULL!	#NULL!	#NULL!	#NULL!	#NULL!	#NULL!	#NULL!	#NULL!		Yes	Don_t know	Don_t know	1.5683
338	55-64	Some college	White, Non-Hispanic	Female	$100,000 to $124,999	Married	Metro	Northeast	Working - as a paid employee	Yes	Yes, some years	$0	No, no effect	No, no effect	Protect myself and others	No	Yes	Yes	No	No	No	No	No	No	No	No		Yes	Not effective	Yes, the full cost is paid	0.8234
339	65-74	High school	White, Non-Hispanic	Male	$40,000 to $49,999	Married	Metro	South	Not working - retired	Yes	No, never	#NULL!	#NULL!	#NULL!	#NULL!	No	No	No	No	No	No	No	No	No	Yes	No	no need	Yes	Don_t know	Don_t know	0.7007
340	75+	Bachelor_s degree or higher	White, Non-Hispanic	Male	$175,000 or more	Married	Metro	Northeast	Working - self-employed	Yes	Yes, every year	$0	No, no effect	No, no effect	Protect myself and others	#NULL!	#NULL!	#NULL!	#NULL!	#NULL!	#NULL!	#NULL!	#NULL!	#NULL!	#NULL!	#NULL!		Yes	It varies from season to season	Yes, the full cost is paid	0.576
341	18-24	High school	Other, Non-Hispanic	Female	$50,000 to $59,999	Never married	Metro	West	Working - as a paid employee	Yes	No, never	#NULL!	#NULL!	#NULL!	#NULL!	No	No	No	No	Yes	No	No	No	No	No	No		Yes	Somewhat effective	Yes, the full cost is paid	1.9548
342	25-34	Some college	White, Non-Hispanic	Male	$85,000 to $99,999	Never married	Metro	South	Working - as a paid employee	Yes	Yes, every year	Less than $30	No, no effect	No, no effect	Protect myself and others	#NULL!	#NULL!	#NULL!	#NULL!	#NULL!	#NULL!	#NULL!	#NULL!	#NULL!	#NULL!	#NULL!		No	Somewhat effective	#NULL!	1.4849
343	65-74	High school	White, Non-Hispanic	Female	$60,000 to $74,999	Married	Non-Metro	Midwest	Not working - retired	Yes	No, never	#NULL!	#NULL!	#NULL!	#NULL!	No	Yes	No	No	Yes	No	Yes	No	No	No	No		Yes	Not effective	Don_t know	0.6767
344	18-24	Some college	White, Non-Hispanic	Female	$125,000 to $149,999	Never married	Metro	Northeast	Working - as a paid employee	Yes	Yes, some years	Less than $30	Yes, more likely	No, less likely	Protect myself	No	Yes	No	No	No	No	No	No	No	No	No		Yes	Somewhat effective	Don_t know	1.2807
345	35-44	High school	White, Non-Hispanic	Female	$50,000 to $59,999	Married	Metro	South	Not working - other	Yes	Yes, some years	$0	Yes, more likely	No, less likely	Protect myself and others	No	No	No	No	Yes	No	No	No	No	No	No		Yes	Somewhat effective	Yes, the full cost is paid	1.0664
346	55-64	Bachelor_s degree or higher	White, Non-Hispanic	Male	$10,000 to $12,499	Never married	Metro	Midwest	Not working - disabled	No	No, never	#NULL!	#NULL!	#NULL!	#NULL!	No	No	No	No	No	No	No	No	No	Yes	No	is it gluten free?	Yes	It varies from season to season	Yes, the full cost is paid	0.7294
347	35-44	Bachelor_s degree or higher	White, Non-Hispanic	Male	$85,000 to $99,999	Married	Metro	South	Working - as a paid employee	Yes	Yes, every year	$0	No, no effect	Yes, more likely	Protect myself and others	#NULL!	#NULL!	#NULL!	#NULL!	#NULL!	#NULL!	#NULL!	#NULL!	#NULL!	#NULL!	#NULL!		Yes	It varies from season to season	Yes, the full cost is paid	0.8953
348	25-34	High school	Hispanic	Female	$50,000 to $59,999	Married	Metro	West	Not working - other	Yes	Yes, some years	$30 to $60	No, less likely	No, no effect	Protect myself and others	No	No	No	No	Yes	No	No	No	No	No	No		No	Somewhat effective	#NULL!	1.2979
349	18-24	High school	White, Non-Hispanic	Male	$150,000 to $174,999	Never married	Non-Metro	Midwest	Not working - other	Yes	Yes, every year	$0	Yes, more likely	Yes, more likely	Protect myself	#NULL!	#NULL!	#NULL!	#NULL!	#NULL!	#NULL!	#NULL!	#NULL!	#NULL!	#NULL!	#NULL!		Yes	Very effective	Yes, the full cost is paid	1.3712
350	25-34	Bachelor_s degree or higher	White, Non-Hispanic	Female	$60,000 to $74,999	Married	Metro	West	Working - as a paid employee	Yes	Yes, every year	Less than $30	Yes, more likely	No, no effect	Protect myself and others	#NULL!	#NULL!	#NULL!	#NULL!	#NULL!	#NULL!	#NULL!	#NULL!	#NULL!	#NULL!	#NULL!		Yes	Somewhat effective	Don_t know	0.8011
351	45-54	Some college	White, Non-Hispanic	Male	$125,000 to $149,999	Married	Metro	South	Working - as a paid employee	Yes	No, never	#NULL!	#NULL!	#NULL!	#NULL!	No	No	Yes	No	No	No	No	No	No	No	No		Yes	Somewhat effective	Don_t know	0.8375
352	18-24	Bachelor_s degree or higher	White, Non-Hispanic	Female	$100,000 to $124,999	Never married	Metro	Northeast	Working - as a paid employee	Yes	Yes, some years	Less than $30	Yes, more likely	No, less likely	Protect myself and others	No	No	No	No	No	No	No	Yes	No	No	No		Yes	Somewhat effective	Yes, but only part of the cost is paid	1.0765
353	45-54	Bachelor_s degree or higher	White, Non-Hispanic	Male	$100,000 to $124,999	Married	Metro	West	Working - as a paid employee	Yes	No, never	#NULL!	#NULL!	#NULL!	#NULL!	No	Yes	Yes	No	Yes	No	No	No	No	No	No		Yes	It varies from season to season	Yes, the full cost is paid	0.6457
354	55-64	High school	White, Non-Hispanic	Male	$10,000 to $12,499	Divorced	Metro	West	Working - as a paid employee	No	Yes, some years	$0	No, no effect	No, no effect	Protect myself and others	Yes	Yes	No	No	No	No	No	Yes	No	No	No		Yes	Somewhat effective	Yes, the full cost is paid	0.936
355	65-74	Some college	White, Non-Hispanic	Female	$40,000 to $49,999	Married	Metro	South	Not working - retired	Yes	Yes, some years	Don_t know	No, no effect	No, no effect	Protect myself and others	No	No	Yes	No	No	No	No	No	No	Yes	No	never had influenza	Yes	Somewhat effective	Don_t know	0.7736
356	18-24	Some college	White, Non-Hispanic	Female	$100,000 to $124,999	Never married	Non-Metro	Midwest	Working - as a paid employee	Yes	Yes, every year	$0	No, no effect	No, no effect	Protect myself and others	#NULL!	#NULL!	#NULL!	#NULL!	#NULL!	#NULL!	#NULL!	#NULL!	#NULL!	#NULL!	#NULL!		Yes	Somewhat effective	Yes, the full cost is paid	1.2346
357	45-54	Some college	Other, Non-Hispanic	Male	$60,000 to $74,999	Married	Metro	South	Working - as a paid employee	Yes	No, never	#NULL!	#NULL!	#NULL!	#NULL!	No	No	No	Yes	No	No	No	No	No	No	No		Yes	Not effective	Yes, but only part of the cost is paid	1.2672
358	35-44	High school	Hispanic	Female	$60,000 to $74,999	Married	Metro	West	Not working - other	Yes	No, never	#NULL!	#NULL!	#NULL!	#NULL!	No	No	Yes	No	No	No	No	No	No	No	No		Yes	Somewhat effective	Don_t know	1.2979
359	55-64	Some college	Black, Non-Hispanic	Female	$25,000 to $29,999	Divorced	Metro	Northeast	Working - as a paid employee	Yes	Yes, some years	Less than $30	Yes, more likely	No, no effect	Protect myself and others	No	No	No	No	Yes	Yes	No	No	No	No	No		No	Somewhat effective	#NULL!	0.9787
360	25-34	Bachelor_s degree or higher	White, Non-Hispanic	Male	$60,000 to $74,999	Married	Metro	Midwest	Working - as a paid employee	No	Yes, some years	Less than $30	No, no effect	Yes, more likely	Protect myself	Yes	Yes	No	No	Yes	No	No	No	No	No	No		Yes	Somewhat effective	Yes, but only part of the cost is paid	1.1381
361	65-74	Some college	White, Non-Hispanic	Female	$40,000 to $49,999	Married	Metro	Midwest	Not working - disabled	Yes	Yes, every year	Don_t know	No, no effect	No, no effect	Protect myself	#NULL!	#NULL!	#NULL!	#NULL!	#NULL!	#NULL!	#NULL!	#NULL!	#NULL!	#NULL!	#NULL!		Yes	Somewhat effective	Yes, the full cost is paid	0.7702
362	55-64	Bachelor_s degree or higher	Other, Non-Hispanic	Male	$50,000 to $59,999	Living with partner	Metro	West	Working - as a paid employee	Yes	Yes, every year	Less than $30	Yes, more likely	Yes, more likely	Protect myself and others	#NULL!	#NULL!	#NULL!	#NULL!	#NULL!	#NULL!	#NULL!	#NULL!	#NULL!	#NULL!	#NULL!		Yes	Somewhat effective	Yes, the full cost is paid	0.8567
363	55-64	Some college	White, Non-Hispanic	Female	$75,000 to $84,999	Married	Metro	Midwest	Working - as a paid employee	Yes	No, never	#NULL!	#NULL!	#NULL!	#NULL!	No	No	No	No	No	No	No	Yes	No	No	No		Yes	Don_t know	Don_t know	0.8783
364	25-34	Bachelor_s degree or higher	White, Non-Hispanic	Female	$25,000 to $29,999	Married	Metro	West	Working - as a paid employee	Yes	Yes, some years	$0	Yes, more likely	No, less likely	Protect myself	No	Yes	No	No	Yes	No	Yes	No	No	No	No		Yes	It varies from season to season	Yes, the full cost is paid	0.9837
365	35-44	Bachelor_s degree or higher	White, Non-Hispanic	Male	$10,000 to $12,499	Never married	Metro	Midwest	Working - as a paid employee	No	No, never	#NULL!	#NULL!	#NULL!	#NULL!	No	Yes	Yes	No	No	No	Yes	No	No	No	No		Yes	It varies from season to season	Yes, the full cost is paid	1.058
366	65-74	Bachelor_s degree or higher	Hispanic	Male	$100,000 to $124,999	Married	Metro	West	Working - as a paid employee	Yes	Yes, every year	$0	No, no effect	No, no effect	Protect myself	#NULL!	#NULL!	#NULL!	#NULL!	#NULL!	#NULL!	#NULL!	#NULL!	#NULL!	#NULL!	#NULL!		Yes	Somewhat effective	Yes, the full cost is paid	0.7512
367	55-64	High school	White, Non-Hispanic	Male	$100,000 to $124,999	Married	Metro	Northeast	Working - as a paid employee	Yes	Yes, every year	$0	No, no effect	Yes, more likely	Protect myself and others	#NULL!	#NULL!	#NULL!	#NULL!	#NULL!	#NULL!	#NULL!	#NULL!	#NULL!	#NULL!	#NULL!		Yes	Very effective	Yes, the full cost is paid	0.8022
368	55-64	Bachelor_s degree or higher	Other, Non-Hispanic	Female	$100,000 to $124,999	Married	Metro	Midwest	Working - as a paid employee	Yes	No, never	#NULL!	#NULL!	#NULL!	#NULL!	No	Yes	No	No	Yes	No	Yes	No	No	No	No		Yes	It varies from season to season	Don_t know	1.2683
369	65-74	Bachelor_s degree or higher	White, Non-Hispanic	Male	$150,000 to $174,999	Married	Metro	Midwest	Working - as a paid employee	Yes	Yes, every year	$0	No, no effect	No, no effect	Protect myself and others	#NULL!	#NULL!	#NULL!	#NULL!	#NULL!	#NULL!	#NULL!	#NULL!	#NULL!	#NULL!	#NULL!		Yes	It varies from season to season	Yes, the full cost is paid	0.6144
370	35-44	Bachelor_s degree or higher	Other, Non-Hispanic	Male	$175,000 or more	Married	Metro	Northeast	Working - as a paid employee	Yes	Yes, every year	$0	Yes, more likely	Yes, more likely	Protect myself and others	#NULL!	#NULL!	#NULL!	#NULL!	#NULL!	#NULL!	#NULL!	#NULL!	#NULL!	#NULL!	#NULL!		Yes	It varies from season to season	Yes, the full cost is paid	1.4355
371	75+	Bachelor_s degree or higher	White, Non-Hispanic	Male	$75,000 to $84,999	Married	Metro	West	Not working - retired	Yes	Yes, every year	$0	Yes, more likely	Yes, more likely	Protect myself and others	#NULL!	#NULL!	#NULL!	#NULL!	#NULL!	#NULL!	#NULL!	#NULL!	#NULL!	#NULL!	#NULL!		Yes	Very effective	Yes, the full cost is paid	0.5662
372	65-74	Bachelor_s degree or higher	White, Non-Hispanic	Male	$175,000 or more	Married	Metro	South	Not working - retired	Yes	Yes, every year	$0	No, no effect	No, no effect	Protect myself and others	#NULL!	#NULL!	#NULL!	#NULL!	#NULL!	#NULL!	#NULL!	#NULL!	#NULL!	#NULL!	#NULL!		Yes	Somewhat effective	Yes, the full cost is paid	0.6172
373	25-34	Some college	White, Non-Hispanic	Female	$40,000 to $49,999	Never married	Metro	Midwest	Working - as a paid employee	Yes	No, never	#NULL!	#NULL!	#NULL!	#NULL!	No	No	No	No	No	No	No	Yes	No	No	No		Yes	Very effective	Yes, but only part of the cost is paid	1.2702
374	55-64	Some college	White, Non-Hispanic	Male	$5,000 to $7,499	Divorced	Non-Metro	West	Working - as a paid employee	No	Yes, some years	$0	Yes, more likely	No, no effect	Protect myself and others	No	No	Yes	No	No	No	No	No	No	Yes	No	lack of interest	Yes	Very effective	Yes, the full cost is paid	1.3677
375	65-74	High school	White, Non-Hispanic	Female	$85,000 to $99,999	Married	Metro	Midwest	Not working - retired	Yes	Yes, every year	$0	No, no effect	No, no effect	Protect myself and others	#NULL!	#NULL!	#NULL!	#NULL!	#NULL!	#NULL!	#NULL!	#NULL!	#NULL!	#NULL!	#NULL!		Yes	Somewhat effective	Yes, the full cost is paid	0.8501
376	18-24	Bachelor_s degree or higher	White, Non-Hispanic	Male	$85,000 to $99,999	Never married	Metro	Northeast	Not working - looking for work	Yes	Yes, every year	$0	No, no effect	No, no effect	Protect myself and others	#NULL!	#NULL!	#NULL!	#NULL!	#NULL!	#NULL!	#NULL!	#NULL!	#NULL!	#NULL!	#NULL!		Yes	It varies from season to season	Yes, the full cost is paid	1.1649
377	75+	Bachelor_s degree or higher	Black, Non-Hispanic	Female	$60,000 to $74,999	Widowed	Metro	South	Not working - retired	No	Yes, some years	Don_t know	No, no effect	No, no effect	Protect myself and others	No	No	No	No	No	No	No	No	No	Yes	No	It makes me sick.	Yes	Somewhat effective	Yes, the full cost is paid	1.2105
378	18-24	Some college	White, Non-Hispanic	Female	$100,000 to $124,999	Never married	Metro	West	Working - as a paid employee	Yes	Yes, some years	$0	No, no effect	No, no effect	Protect myself	No	Yes	No	No	No	No	No	No	No	No	No		Yes	Not effective	Yes, the full cost is paid	1.2587
379	35-44	Bachelor_s degree or higher	White, Non-Hispanic	Female	$100,000 to $124,999	Married	Non-Metro	Midwest	Not working - other	Yes	Yes, every year	$0	Yes, more likely	No, no effect	Protect myself and others	#NULL!	#NULL!	#NULL!	#NULL!	#NULL!	#NULL!	#NULL!	#NULL!	#NULL!	#NULL!	#NULL!		Yes	It varies from season to season	Don_t know	0.8922
380	75+	Bachelor_s degree or higher	White, Non-Hispanic	Male	$125,000 to $149,999	Married	Metro	South	Not working - retired	Yes	Yes, every year	$0	No, no effect	No, no effect	Protect myself and others	#NULL!	#NULL!	#NULL!	#NULL!	#NULL!	#NULL!	#NULL!	#NULL!	#NULL!	#NULL!	#NULL!		Yes	Somewhat effective	Yes, the full cost is paid	0.6172
381	75+	Bachelor_s degree or higher	White, Non-Hispanic	Female	$100,000 to $124,999	Widowed	Metro	South	Not working - retired	Yes	No, never	#NULL!	#NULL!	#NULL!	#NULL!	No	No	No	No	No	No	No	No	No	Yes	No	It has made me sick	Yes	Don_t know	Yes, the full cost is paid	0.6994
382	75+	Some college	White, Non-Hispanic	Female	$100,000 to $124,999	Widowed	Metro	South	Not working - retired	Yes	No, never	#NULL!	#NULL!	#NULL!	#NULL!	No	No	No	No	No	No	No	No	No	Yes	No	I am not around enough people to come in contact with a person who has influenza	Yes	It varies from season to season	Yes, the full cost is paid	0.832
383	55-64	High school	White, Non-Hispanic	Female	$175,000 or more	Married	Metro	South	Working - as a paid employee	Yes	Yes, every year	$0	No, no effect	No, no effect	Protect myself	#NULL!	#NULL!	#NULL!	#NULL!	#NULL!	#NULL!	#NULL!	#NULL!	#NULL!	#NULL!	#NULL!		Yes	Somewhat effective	Yes, the full cost is paid	0.8539
384	18-24	Less than high school	Hispanic	Female	$60,000 to $74,999	Living with partner	Metro	West	Not working - other	Yes	Yes, some years	Don_t know	No, no effect	No, no effect	Protect myself and others	No	No	No	No	No	No	No	No	Yes	No	No		No	Somewhat effective	#NULL!	2.0762
385	25-34	Some college	Black, Non-Hispanic	Male	$75,000 to $84,999	Married	Metro	Midwest	Working - as a paid employee	No	No, never	#NULL!	#NULL!	#NULL!	#NULL!	No	No	Yes	No	No	No	Yes	No	No	No	No		No	Don_t know	#NULL!	2.0838
386	65-74	Bachelor_s degree or higher	White, Non-Hispanic	Female	$100,000 to $124,999	Married	Metro	Northeast	Not working - retired	Yes	Yes, every year	$0	No, no effect	Yes, more likely	Protect myself and others	#NULL!	#NULL!	#NULL!	#NULL!	#NULL!	#NULL!	#NULL!	#NULL!	#NULL!	#NULL!	#NULL!		Yes	It varies from season to season	Yes, the full cost is paid	0.6527
387	35-44	High school	White, Non-Hispanic	Male	$60,000 to $74,999	Married	Metro	South	Working - self-employed	Yes	Yes, every year	$0	No, no effect	No, no effect	Protect myself and others	#NULL!	#NULL!	#NULL!	#NULL!	#NULL!	#NULL!	#NULL!	#NULL!	#NULL!	#NULL!	#NULL!		No	It varies from season to season	#NULL!	0.9628
388	18-24	High school	White, Non-Hispanic	Male	$75,000 to $84,999	Never married	Metro	Midwest	Working - as a paid employee	Yes	No, never	#NULL!	#NULL!	#NULL!	#NULL!	No	No	Yes	No	Yes	No	No	No	No	No	No		Yes	Somewhat effective	Yes, the full cost is paid	1.5172
389	55-64	Bachelor_s degree or higher	White, Non-Hispanic	Male	$85,000 to $99,999	Living with partner	Metro	South	Not working - retired	Yes	No, never	#NULL!	#NULL!	#NULL!	#NULL!	No	No	No	No	No	No	No	No	No	Yes	No	Didn_t hear about the shot	Yes	Don_t know	Don_t know	0.6172
390	35-44	High school	Black, Non-Hispanic	Female	$60,000 to $74,999	Never married	Metro	South	Working - as a paid employee	No	No, never	#NULL!	#NULL!	#NULL!	#NULL!	No	No	Yes	No	No	No	Yes	Yes	No	No	No		Yes	Don_t know	Don_t know	2.0956
391	35-44	Bachelor_s degree or higher	White, Non-Hispanic	Male	$50,000 to $59,999	Married	Non-Metro	South	Working - as a paid employee	Yes	No, never	#NULL!	#NULL!	#NULL!	#NULL!	No	Yes	No	No	No	No	Yes	Yes	No	Yes	No	they dont work	Yes	It varies from season to season	Don_t know	0.7714
392	45-54	Some college	White, Non-Hispanic	Male	$175,000 or more	Married	Metro	South	Working - as a paid employee	Yes	No, never	#NULL!	#NULL!	#NULL!	#NULL!	No	Yes	No	No	Yes	No	Yes	No	No	Yes	No	the vaccine doesw not work.	Yes	Not effective	Yes, but only part of the cost is paid	0.8375
393	55-64	Bachelor_s degree or higher	2+ Races, Non-Hispanic	Male	$40,000 to $49,999	Married	Metro	South	Working - self-employed	Yes	No, never	#NULL!	#NULL!	#NULL!	#NULL!	No	No	Yes	No	No	No	No	No	No	Yes	No	my oncologist told me not to.	Yes	It varies from season to season	Don_t know	0.2705
394	25-34	Some college	White, Non-Hispanic	Male	$30,000 to $34,999	Divorced	Metro	West	Working - as a paid employee	No	No, never	#NULL!	#NULL!	#NULL!	#NULL!	No	No	No	No	Yes	No	No	No	No	No	No		Yes	Not effective	Yes, the full cost is paid	1.8361
395	25-34	Bachelor_s degree or higher	White, Non-Hispanic	Male	$30,000 to $34,999	Living with partner	Metro	Northeast	Not working - other	Yes	No, never	#NULL!	#NULL!	#NULL!	#NULL!	No	No	Yes	No	No	No	No	No	No	No	No		Yes	Don_t know	Don_t know	1.0831
396	55-64	Some college	White, Non-Hispanic	Female	$15,000 to $19,999	Divorced	Metro	West	Not working - disabled	No	No, never	#NULL!	#NULL!	#NULL!	#NULL!	No	No	No	No	Yes	No	No	No	No	No	No		Yes	It varies from season to season	Yes, the full cost is paid	0.9607
397	45-54	Bachelor_s degree or higher	White, Non-Hispanic	Female	$50,000 to $59,999	Married	Metro	Midwest	Working - as a paid employee	Yes	Yes, every year	Less than $30	No, no effect	No, no effect	Protect myself and others	#NULL!	#NULL!	#NULL!	#NULL!	#NULL!	#NULL!	#NULL!	#NULL!	#NULL!	#NULL!	#NULL!		Yes	Somewhat effective	Yes, but only part of the cost is paid	0.6502
398	35-44	Some college	White, Non-Hispanic	Male	$50,000 to $59,999	Never married	Metro	South	Working - as a paid employee	Yes	Yes, every year	$0	No, no effect	No, no effect	Protect myself and others	#NULL!	#NULL!	#NULL!	#NULL!	#NULL!	#NULL!	#NULL!	#NULL!	#NULL!	#NULL!	#NULL!		Yes	Somewhat effective	Yes, the full cost is paid	0.9381
399	35-44	Some college	White, Non-Hispanic	Female	$12,500 to $14,999	Married	Non-Metro	South	Working - as a paid employee	Yes	Yes, every year	$0	Yes, more likely	Yes, more likely	Protect myself and others	#NULL!	#NULL!	#NULL!	#NULL!	#NULL!	#NULL!	#NULL!	#NULL!	#NULL!	#NULL!	#NULL!		Yes	Very effective	Yes, the full cost is paid	0.9449
401	18-24	Some college	Hispanic	Female	$5,000 to $7,499	Never married	Metro	West	Not working - looking for work	Yes	Yes, some years	Less than $30	No, less likely	No, less likely	Protect myself and others	Yes	No	No	Yes	No	No	No	No	No	No	No		Yes	Somewhat effective	Yes, the full cost is paid	1.3676
402	55-64	Some college	White, Non-Hispanic	Male	$35,000 to $39,999	Married	Metro	South	Working - as a paid employee	Yes	Yes, every year	Less than $30	Yes, more likely	No, less likely	Protect myself	#NULL!	#NULL!	#NULL!	#NULL!	#NULL!	#NULL!	#NULL!	#NULL!	#NULL!	#NULL!	#NULL!		Yes	Somewhat effective	Yes, but only part of the cost is paid	0.6827
403	65-74	High school	White, Non-Hispanic	Female	$50,000 to $59,999	Married	Metro	South	Not working - retired	Yes	Yes, every year	$0	No, no effect	No, no effect	Protect myself and others	#NULL!	#NULL!	#NULL!	#NULL!	#NULL!	#NULL!	#NULL!	#NULL!	#NULL!	#NULL!	#NULL!		Yes	Somewhat effective	Yes, the full cost is paid	0.7521
405	65-74	Some college	White, Non-Hispanic	Female	$40,000 to $49,999	Married	Non-Metro	South	Not working - retired	Yes	Yes, every year	$0	No, no effect	No, no effect	Protect myself and others	#NULL!	#NULL!	#NULL!	#NULL!	#NULL!	#NULL!	#NULL!	#NULL!	#NULL!	#NULL!	#NULL!		Yes	Very effective	Yes, the full cost is paid	0.7568
406	65-74	Bachelor_s degree or higher	Hispanic	Male	$100,000 to $124,999	Married	Metro	West	Not working - retired	Yes	Yes, every year	Don_t know	No, no effect	No, no effect	Protect myself and others	#NULL!	#NULL!	#NULL!	#NULL!	#NULL!	#NULL!	#NULL!	#NULL!	#NULL!	#NULL!	#NULL!		Yes	Somewhat effective	Yes, the full cost is paid	0.7512
407	55-64	High school	White, Non-Hispanic	Female	$50,000 to $59,999	Married	Metro	Midwest	Not working - other	Yes	Yes, every year	Less than $30	Yes, more likely	Yes, more likely	Protect myself	#NULL!	#NULL!	#NULL!	#NULL!	#NULL!	#NULL!	#NULL!	#NULL!	#NULL!	#NULL!	#NULL!		Yes	Very effective	Yes, but only part of the cost is paid	0.7488
408	25-34	Bachelor_s degree or higher	White, Non-Hispanic	Female	$125,000 to $149,999	Married	Metro	Northeast	Working - as a paid employee	Yes	Yes, some years	$0	No, no effect	No, no effect	Protect myself and others	No	Yes	Yes	No	No	No	No	Yes	No	No	No		Yes	Somewhat effective	Don_t know	1.0765
409	35-44	High school	White, Non-Hispanic	Male	$25,000 to $29,999	Living with partner	Metro	Northeast	Not working - disabled	Yes	No, never	#NULL!	#NULL!	#NULL!	#NULL!	No	No	No	No	No	No	No	Yes	No	No	No		Yes	Somewhat effective	Yes, the full cost is paid	0.9486
410	18-24	Less than high school	Hispanic	Male	$175,000 or more	Never married	Metro	Northeast	Working - as a paid employee	Yes	Yes, every year	Less than $30	Yes, more likely	Yes, more likely	Protect myself and others	#NULL!	#NULL!	#NULL!	#NULL!	#NULL!	#NULL!	#NULL!	#NULL!	#NULL!	#NULL!	#NULL!		Yes	Very effective	Yes, the full cost is paid	2.5953
411	35-44	Bachelor_s degree or higher	White, Non-Hispanic	Male	$175,000 or more	Married	Metro	South	Working - as a paid employee	Yes	Yes, every year	$0	No, no effect	No, no effect	Protect myself and others	#NULL!	#NULL!	#NULL!	#NULL!	#NULL!	#NULL!	#NULL!	#NULL!	#NULL!	#NULL!	#NULL!		Yes	Very effective	Yes, the full cost is paid	0.8953
412	45-54	Bachelor_s degree or higher	White, Non-Hispanic	Male	$75,000 to $84,999	Married	Metro	South	Working - self-employed	Yes	Yes, every year	$0	No, no effect	Yes, more likely	Protect myself and others	#NULL!	#NULL!	#NULL!	#NULL!	#NULL!	#NULL!	#NULL!	#NULL!	#NULL!	#NULL!	#NULL!		Yes	Somewhat effective	Yes, the full cost is paid	0.7039
413	18-24	High school	White, Non-Hispanic	Male	$75,000 to $84,999	Never married	Metro	South	Working - as a paid employee	Yes	Yes, some years	$0	Yes, more likely	No, no effect	Protect myself	No	No	No	No	No	No	No	Yes	No	No	No		Yes	Somewhat effective	Yes, the full cost is paid	1.524
414	35-44	Bachelor_s degree or higher	Hispanic	Female	$175,000 or more	Married	Metro	Midwest	Not working - other	Yes	Yes, every year	$0	Yes, more likely	Yes, more likely	Protect myself and others	#NULL!	#NULL!	#NULL!	#NULL!	#NULL!	#NULL!	#NULL!	#NULL!	#NULL!	#NULL!	#NULL!		Yes	Somewhat effective	Yes, but only part of the cost is paid	1.3098
415	18-24	Less than high school	Hispanic	Female	$175,000 or more	Never married	Metro	West	Working - as a paid employee	Yes	Yes, some years	Don_t know	No, less likely	Yes, more likely	Protect myself	Yes	No	No	Yes	No	No	Yes	No	No	No	No		Yes	Somewhat effective	Yes, but only part of the cost is paid	2.3572
416	65-74	Bachelor_s degree or higher	White, Non-Hispanic	Male	$75,000 to $84,999	Widowed	Metro	Midwest	Working - self-employed	Yes	Yes, every year	$30 to $60	No, no effect	No, no effect	Protect myself	#NULL!	#NULL!	#NULL!	#NULL!	#NULL!	#NULL!	#NULL!	#NULL!	#NULL!	#NULL!	#NULL!		Yes	Somewhat effective	Yes, but only part of the cost is paid	0.6144
417	65-74	Bachelor_s degree or higher	White, Non-Hispanic	Male	$50,000 to $59,999	Married	Metro	South	Not working - retired	Yes	Yes, every year	Don_t know	No, no effect	No, no effect	Protect myself and others	#NULL!	#NULL!	#NULL!	#NULL!	#NULL!	#NULL!	#NULL!	#NULL!	#NULL!	#NULL!	#NULL!		Yes	Very effective	Yes, the full cost is paid	0.5436
418	75+	Some college	White, Non-Hispanic	Male	$85,000 to $99,999	Married	Metro	South	Not working - retired	Yes	Yes, every year	$0	Yes, more likely	Yes, more likely	Protect myself and others	#NULL!	#NULL!	#NULL!	#NULL!	#NULL!	#NULL!	#NULL!	#NULL!	#NULL!	#NULL!	#NULL!		Yes	Very effective	Yes, the full cost is paid	0.7343
420	18-24	Bachelor_s degree or higher	White, Non-Hispanic	Female	$75,000 to $84,999	Never married	Metro	Northeast	Working - as a paid employee	Yes	No, never	#NULL!	#NULL!	#NULL!	#NULL!	No	No	No	No	No	No	No	No	No	Yes	No	I do not get the vaccine and I have never gotten the flu	Yes	It varies from season to season	Don_t know	1.0765
421	75+	High school	White, Non-Hispanic	Female	$30,000 to $34,999	Widowed	Non-Metro	Midwest	Not working - retired	No	Yes, every year	$0	No, no effect	No, no effect	Protect myself and others	#NULL!	#NULL!	#NULL!	#NULL!	#NULL!	#NULL!	#NULL!	#NULL!	#NULL!	#NULL!	#NULL!		Yes	Somewhat effective	Yes, the full cost is paid	1.0357
422	45-54	Bachelor_s degree or higher	White, Non-Hispanic	Female	$175,000 or more	Married	Metro	West	Not working - other	Yes	Yes, every year	Less than $30	Yes, more likely	No, less likely	Protect myself and others	#NULL!	#NULL!	#NULL!	#NULL!	#NULL!	#NULL!	#NULL!	#NULL!	#NULL!	#NULL!	#NULL!		Yes	Very effective	Yes, the full cost is paid	0.6802
423	65-74	Bachelor_s degree or higher	White, Non-Hispanic	Male	$100,000 to $124,999	Widowed	Metro	West	Not working - retired	Yes	Yes, every year	$0	No, no effect	No, no effect	Protect myself	#NULL!	#NULL!	#NULL!	#NULL!	#NULL!	#NULL!	#NULL!	#NULL!	#NULL!	#NULL!	#NULL!		Yes	Somewhat effective	Yes, the full cost is paid	0.5662
424	65-74	High school	White, Non-Hispanic	Male	$10,000 to $12,499	Married	Metro	West	Not working - other	Yes	No, never	#NULL!	#NULL!	#NULL!	#NULL!	No	Yes	No	No	Yes	Yes	No	No	No	No	No		No	Somewhat effective	#NULL!	0.566
425	55-64	Some college	White, Non-Hispanic	Female	$20,000 to $24,999	Divorced	Metro	Midwest	Working - self-employed	Yes	Yes, every year	Less than $30	No, no effect	No, no effect	Protect myself and others	#NULL!	#NULL!	#NULL!	#NULL!	#NULL!	#NULL!	#NULL!	#NULL!	#NULL!	#NULL!	#NULL!		Yes	Somewhat effective	Don_t know	0.6783
426	75+	Some college	White, Non-Hispanic	Female	$20,000 to $24,999	Widowed	Metro	South	Not working - retired	Yes	Yes, every year	$0	No, no effect	No, no effect	Protect myself and others	#NULL!	#NULL!	#NULL!	#NULL!	#NULL!	#NULL!	#NULL!	#NULL!	#NULL!	#NULL!	#NULL!		Yes	It varies from season to season	Yes, the full cost is paid	0.6813
427	55-64	High school	White, Non-Hispanic	Female	$85,000 to $99,999	Widowed	Metro	West	Working - as a paid employee	Yes	Yes, some years	$0	No, no effect	No, no effect	Protect myself and others	No	No	No	No	No	No	No	Yes	No	No	No		Yes	Somewhat effective	Yes, the full cost is paid	0.7833
428	35-44	Bachelor_s degree or higher	White, Non-Hispanic	Female	$150,000 to $174,999	Married	Metro	Northeast	Not working - other	Yes	No, never	#NULL!	#NULL!	#NULL!	#NULL!	No	No	No	No	Yes	No	No	No	No	No	No		Yes	Somewhat effective	Yes, the full cost is paid	0.9254
429	75+	High school	White, Non-Hispanic	Female	$50,000 to $59,999	Married	Non-Metro	Midwest	Not working - retired	Yes	Yes, every year	Less than $30	No, no effect	No, no effect	Protect myself and others	#NULL!	#NULL!	#NULL!	#NULL!	#NULL!	#NULL!	#NULL!	#NULL!	#NULL!	#NULL!	#NULL!		Yes	Very effective	Yes, but only part of the cost is paid	0.6767
430	55-64	Bachelor_s degree or higher	White, Non-Hispanic	Male	$175,000 or more	Married	Metro	South	Working - as a paid employee	Yes	Yes, every year	$0	No, no effect	No, no effect	Protect myself and others	#NULL!	#NULL!	#NULL!	#NULL!	#NULL!	#NULL!	#NULL!	#NULL!	#NULL!	#NULL!	#NULL!		Yes	Somewhat effective	Yes, the full cost is paid	0.7039
431	45-54	Some college	White, Non-Hispanic	Female	$100,000 to $124,999	Married	Metro	South	Working - as a paid employee	Yes	Yes, some years	$0	No, no effect	No, no effect	Protect myself and others	No	Yes	No	No	Yes	No	No	No	No	No	No		Yes	It varies from season to season	Yes, the full cost is paid	0.8822
432	65-74	High school	White, Non-Hispanic	Female	$35,000 to $39,999	Married	Non-Metro	Midwest	Not working - retired	No	Yes, every year	$0	No, no effect	No, no effect	Protect myself and others	#NULL!	#NULL!	#NULL!	#NULL!	#NULL!	#NULL!	#NULL!	#NULL!	#NULL!	#NULL!	#NULL!		Yes	It varies from season to season	Don_t know	1.0357
433	55-64	Bachelor_s degree or higher	White, Non-Hispanic	Male	$100,000 to $124,999	Never married	Metro	South	Not working - retired	Yes	No, never	#NULL!	#NULL!	#NULL!	#NULL!	No	No	No	No	Yes	No	No	No	No	No	No		Yes	It varies from season to season	Yes, the full cost is paid	0.6172
434	45-54	Some college	Other, Non-Hispanic	Male	$175,000 or more	Married	Metro	West	Working - as a paid employee	Yes	Yes, some years	$30 to $60	Yes, more likely	Yes, more likely	Protect myself and others	No	No	No	No	No	No	No	No	No	Yes	No	N/A	Yes	Somewhat effective	Yes, the full cost is paid	1.3198
435	55-64	High school	White, Non-Hispanic	Male	$40,000 to $49,999	Married	Metro	South	Not working - retired	No	Yes, every year	$0	No, no effect	Yes, more likely	Protect myself and others	#NULL!	#NULL!	#NULL!	#NULL!	#NULL!	#NULL!	#NULL!	#NULL!	#NULL!	#NULL!	#NULL!		Yes	Very effective	Yes, the full cost is paid	1.0158
436	25-34	Some college	White, Non-Hispanic	Male	$75,000 to $84,999	Married	Non-Metro	South	Working - as a paid employee	Yes	Yes, every year	Less than $30	No, no effect	No, no effect	Protect myself and others	#NULL!	#NULL!	#NULL!	#NULL!	#NULL!	#NULL!	#NULL!	#NULL!	#NULL!	#NULL!	#NULL!		Yes	It varies from season to season	Yes, but only part of the cost is paid	1.0419
437	65-74	Less than high school	Black, Non-Hispanic	Female	$75,000 to $84,999	Divorced	Metro	South	Not working - other	Yes	Yes, every year	Less than $30	No, less likely	No, less likely	Protect myself	#NULL!	#NULL!	#NULL!	#NULL!	#NULL!	#NULL!	#NULL!	#NULL!	#NULL!	#NULL!	#NULL!		Yes	It varies from season to season	Yes, the full cost is paid	1.5918
438	35-44	Bachelor_s degree or higher	Other, Non-Hispanic	Male	$75,000 to $84,999	Married	Metro	West	Working - as a paid employee	Yes	Yes, some years	Don_t know	No, no effect	No, no effect	Protect myself and others	No	No	No	No	No	No	No	No	No	Yes	No	busy	Yes	Don_t know	Don_t know	1.4108
439	25-34	Bachelor_s degree or higher	White, Non-Hispanic	Female	$60,000 to $74,999	Never married	Metro	Northeast	Working - as a paid employee	Yes	Yes, every year	$0	No, no effect	No, no effect	Protect myself and others	#NULL!	#NULL!	#NULL!	#NULL!	#NULL!	#NULL!	#NULL!	#NULL!	#NULL!	#NULL!	#NULL!		Yes	It varies from season to season	Yes, the full cost is paid	0.9482
440	55-64	Bachelor_s degree or higher	White, Non-Hispanic	Male	$150,000 to $174,999	Married	Metro	West	Working - as a paid employee	Yes	No, never	#NULL!	#NULL!	#NULL!	#NULL!	No	No	No	No	No	No	No	Yes	No	No	No		Yes	It varies from season to season	Don_t know	0.6457
441	75+	High school	White, Non-Hispanic	Male	$125,000 to $149,999	Married	Metro	South	Not working - retired	Yes	Yes, every year	$0	Yes, more likely	Yes, more likely	Protect myself and others	#NULL!	#NULL!	#NULL!	#NULL!	#NULL!	#NULL!	#NULL!	#NULL!	#NULL!	#NULL!	#NULL!		Yes	Very effective	Yes, the full cost is paid	0.7536
442	55-64	Bachelor_s degree or higher	White, Non-Hispanic	Female	$175,000 or more	Married	Metro	West	Not working - retired	Yes	No, never	#NULL!	#NULL!	#NULL!	#NULL!	No	No	Yes	No	No	No	No	No	No	No	No		Yes	Somewhat effective	Don_t know	0.6802
443	35-44	Bachelor_s degree or higher	White, Non-Hispanic	Female	$125,000 to $149,999	Married	Metro	South	Working - self-employed	Yes	No, never	#NULL!	#NULL!	#NULL!	#NULL!	No	Yes	No	No	No	No	No	Yes	No	No	No		Yes	Not effective	Yes, the full cost is paid	0.9915
444	65-74	Bachelor_s degree or higher	White, Non-Hispanic	Male	$100,000 to $124,999	Married	Metro	West	Not working - retired	Yes	Yes, some years	$0	No, no effect	No, no effect	Protect myself and others	No	No	No	No	No	No	Yes	No	No	No	No		Yes	Somewhat effective	Yes, the full cost is paid	0.5662
445	45-54	Bachelor_s degree or higher	Black, Non-Hispanic	Male	$100,000 to $124,999	Married	Metro	South	Working - as a paid employee	Yes	Yes, some years	$0	No, no effect	No, no effect	Protect myself and others	No	Yes	No	No	No	No	No	No	No	No	No		Yes	Not effective	Yes, the full cost is paid	0.9542
446	25-34	Bachelor_s degree or higher	Black, Non-Hispanic	Male	$100,000 to $124,999	Married	Metro	South	Working - as a paid employee	Yes	Yes, every year	$0	No, no effect	No, no effect	Protect myself and others	#NULL!	#NULL!	#NULL!	#NULL!	#NULL!	#NULL!	#NULL!	#NULL!	#NULL!	#NULL!	#NULL!		Yes	Somewhat effective	Yes, the full cost is paid	1.6918
447	65-74	Bachelor_s degree or higher	White, Non-Hispanic	Male	$75,000 to $84,999	Married	Metro	West	Working - self-employed	Yes	Yes, every year	$0	No, no effect	No, no effect	Protect myself and others	#NULL!	#NULL!	#NULL!	#NULL!	#NULL!	#NULL!	#NULL!	#NULL!	#NULL!	#NULL!	#NULL!		Yes	Somewhat effective	Yes, the full cost is paid	0.5662
448	25-34	Bachelor_s degree or higher	White, Non-Hispanic	Female	$100,000 to $124,999	Married	Metro	South	Working - as a paid employee	Yes	No, never	#NULL!	#NULL!	#NULL!	#NULL!	No	No	Yes	No	No	No	No	Yes	No	No	No		Yes	Somewhat effective	Don_t know	1.1534
449	75+	Some college	White, Non-Hispanic	Male	$40,000 to $49,999	Widowed	Metro	Midwest	Not working - retired	Yes	No, never	#NULL!	#NULL!	#NULL!	#NULL!	No	Yes	Yes	No	Yes	No	No	Yes	No	No	No		Yes	Somewhat effective	Don_t know	0.6797
450	55-64	High school	White, Non-Hispanic	Female	$75,000 to $84,999	Married	Metro	Midwest	Working - as a paid employee	Yes	Yes, every year	$0	No, no effect	No, no effect	Protect myself	#NULL!	#NULL!	#NULL!	#NULL!	#NULL!	#NULL!	#NULL!	#NULL!	#NULL!	#NULL!	#NULL!		Yes	Very effective	Yes, the full cost is paid	0.8501
451	55-64	Bachelor_s degree or higher	2+ Races, Non-Hispanic	Female	$100,000 to $124,999	Married	Metro	South	Working - as a paid employee	Yes	No, never	#NULL!	#NULL!	#NULL!	#NULL!	No	No	No	No	No	No	No	No	No	Yes	No	I am healthy and can endure an illness just fine. Have had influenza twice several years ago.	Yes	Somewhat effective	Don_t know	0.2705
452	65-74	Bachelor_s degree or higher	White, Non-Hispanic	Male	$50,000 to $59,999	Married	Metro	Midwest	Not working - retired	Yes	Yes, every year	$0	No, no effect	No, no effect	Protect myself and others	#NULL!	#NULL!	#NULL!	#NULL!	#NULL!	#NULL!	#NULL!	#NULL!	#NULL!	#NULL!	#NULL!		Yes	Somewhat effective	Yes, the full cost is paid	0.5412
453	55-64	Bachelor_s degree or higher	White, Non-Hispanic	Male	$25,000 to $29,999	Never married	Metro	South	Working - as a paid employee	Yes	Yes, every year	$0	No, no effect	No, no effect	Protect others	#NULL!	#NULL!	#NULL!	#NULL!	#NULL!	#NULL!	#NULL!	#NULL!	#NULL!	#NULL!	#NULL!		No	Somewhat effective	#NULL!	0.6545
454	65-74	High school	White, Non-Hispanic	Male	$150,000 to $174,999	Married	Metro	South	Working - as a paid employee	Yes	Yes, every year	$0	No, no effect	No, no effect	Protect myself and others	#NULL!	#NULL!	#NULL!	#NULL!	#NULL!	#NULL!	#NULL!	#NULL!	#NULL!	#NULL!	#NULL!		Yes	Very effective	Yes, the full cost is paid	0.7536
455	55-64	Bachelor_s degree or higher	White, Non-Hispanic	Male	$175,000 or more	Married	Non-Metro	West	Working - as a paid employee	Yes	Yes, every year	Less than $30	Yes, more likely	Yes, more likely	Protect myself and others	#NULL!	#NULL!	#NULL!	#NULL!	#NULL!	#NULL!	#NULL!	#NULL!	#NULL!	#NULL!	#NULL!		Yes	Somewhat effective	Yes, but only part of the cost is paid	1.1045
456	45-54	Less than high school	Hispanic	Male	$40,000 to $49,999	Never married	Non-Metro	South	Working - as a paid employee	No	No, never	#NULL!	#NULL!	#NULL!	#NULL!	No	No	No	No	No	No	No	No	No	No	Yes		No	Don_t know	#NULL!	2.068
457	45-54	Bachelor_s degree or higher	White, Non-Hispanic	Male	$100,000 to $124,999	Married	Metro	West	Working - as a paid employee	Yes	Yes, every year	$0	Yes, more likely	No, less likely	Protect myself	#NULL!	#NULL!	#NULL!	#NULL!	#NULL!	#NULL!	#NULL!	#NULL!	#NULL!	#NULL!	#NULL!		Yes	Very effective	Yes, the full cost is paid	0.6457
458	75+	High school	White, Non-Hispanic	Male	$25,000 to $29,999	Married	Metro	Northeast	Not working - retired	Yes	Yes, every year	$0	No, no effect	No, no effect	Protect myself and others	#NULL!	#NULL!	#NULL!	#NULL!	#NULL!	#NULL!	#NULL!	#NULL!	#NULL!	#NULL!	#NULL!		Yes	Somewhat effective	Yes, the full cost is paid	0.654
459	55-64	Bachelor_s degree or higher	Black, Non-Hispanic	Female	$40,000 to $49,999	Divorced	Metro	Midwest	Not working - retired	Yes	Yes, some years	$0	Yes, more likely	Yes, more likely	Protect myself and others	Yes	No	No	No	Yes	Yes	No	No	Yes	No	No		Yes	Somewhat effective	Yes, but only part of the cost is paid	0.9305
460	45-54	High school	Hispanic	Male	$125,000 to $149,999	Married	Metro	West	Not working - disabled	Yes	Yes, every year	$0	No, no effect	No, no effect	Protect myself and others	#NULL!	#NULL!	#NULL!	#NULL!	#NULL!	#NULL!	#NULL!	#NULL!	#NULL!	#NULL!	#NULL!		Yes	Very effective	Yes, the full cost is paid	1.0461
461	65-74	High school	White, Non-Hispanic	Female	$5,000 to $7,499	Divorced	Non-Metro	Midwest	Not working - retired	No	Yes, some years	$0	No, no effect	No, no effect	Protect myself	Yes	No	No	No	No	No	No	No	No	No	No		Yes	It varies from season to season	Yes, the full cost is paid	0.9121
462	65-74	Some college	Black, Non-Hispanic	Male	$25,000 to $29,999	Divorced	Metro	South	Working - as a paid employee	Yes	Yes, some years	$0	No, less likely	No, no effect	Protect myself and others	No	No	Yes	No	No	No	No	No	No	No	No		Yes	It varies from season to season	Yes, the full cost is paid	0.9254
463	65-74	Bachelor_s degree or higher	White, Non-Hispanic	Female	$35,000 to $39,999	Divorced	Metro	Northeast	Working - self-employed	Yes	No, never	#NULL!	#NULL!	#NULL!	#NULL!	No	No	No	No	No	No	No	No	No	Yes	No	did not know about it	Yes	Don_t know	Don_t know	0.6069
464	55-64	High school	White, Non-Hispanic	Male	$85,000 to $99,999	Married	Metro	Midwest	Not working - retired	Yes	No, never	#NULL!	#NULL!	#NULL!	#NULL!	No	No	Yes	No	No	No	No	No	No	No	No		Yes	Don_t know	Don_t know	0.7502
465	45-54	Some college	2+ Races, Non-Hispanic	Female	$100,000 to $124,999	Married	Metro	South	Not working - disabled	Yes	Yes, every year	$0	Yes, more likely	Yes, more likely	Protect myself and others	#NULL!	#NULL!	#NULL!	#NULL!	#NULL!	#NULL!	#NULL!	#NULL!	#NULL!	#NULL!	#NULL!		No	Somewhat effective	#NULL!	0.3127
466	75+	High school	Black, Non-Hispanic	Female	$25,000 to $29,999	Widowed	Metro	Northeast	Not working - retired	No	Yes, every year	$0	No, no effect	No, no effect	Protect myself and others	#NULL!	#NULL!	#NULL!	#NULL!	#NULL!	#NULL!	#NULL!	#NULL!	#NULL!	#NULL!	#NULL!		Yes	Somewhat effective	Yes, the full cost is paid	1.4563
467	75+	High school	White, Non-Hispanic	Female	$25,000 to $29,999	Widowed	Metro	Midwest	Not working - retired	Yes	Yes, every year	$0	No, no effect	No, no effect	Protect myself and others	#NULL!	#NULL!	#NULL!	#NULL!	#NULL!	#NULL!	#NULL!	#NULL!	#NULL!	#NULL!	#NULL!		Yes	Very effective	Yes, the full cost is paid	0.7904
468	65-74	Bachelor_s degree or higher	White, Non-Hispanic	Female	$125,000 to $149,999	Married	Metro	Midwest	Not working - retired	Yes	Yes, every year	Don_t know	No, no effect	No, no effect	Protect myself	#NULL!	#NULL!	#NULL!	#NULL!	#NULL!	#NULL!	#NULL!	#NULL!	#NULL!	#NULL!	#NULL!		Yes	Somewhat effective	Yes, the full cost is paid	0.6962
469	55-64	High school	White, Non-Hispanic	Female	$100,000 to $124,999	Married	Non-Metro	South	Working - self-employed	Yes	No, never	#NULL!	#NULL!	#NULL!	#NULL!	No	Yes	Yes	No	No	No	Yes	No	No	No	No		No	Not effective	#NULL!	0.8858
470	35-44	Bachelor_s degree or higher	White, Non-Hispanic	Male	$125,000 to $149,999	Married	Metro	South	Working - as a paid employee	Yes	Yes, every year	$0	No, no effect	No, no effect	Protect myself and others	#NULL!	#NULL!	#NULL!	#NULL!	#NULL!	#NULL!	#NULL!	#NULL!	#NULL!	#NULL!	#NULL!		Yes	It varies from season to season	Yes, the full cost is paid	0.8953
471	65-74	Bachelor_s degree or higher	White, Non-Hispanic	Male	$50,000 to $59,999	Married	Metro	South	Working - self-employed	Yes	Yes, every year	$0	No, no effect	No, no effect	Protect myself and others	#NULL!	#NULL!	#NULL!	#NULL!	#NULL!	#NULL!	#NULL!	#NULL!	#NULL!	#NULL!	#NULL!		Yes	Somewhat effective	Yes, the full cost is paid	0.5436
472	65-74	Some college	White, Non-Hispanic	Female	$125,000 to $149,999	Married	Metro	Northeast	Not working - retired	Yes	Yes, every year	$0	No, no effect	No, no effect	Protect myself and others	#NULL!	#NULL!	#NULL!	#NULL!	#NULL!	#NULL!	#NULL!	#NULL!	#NULL!	#NULL!	#NULL!		Yes	Somewhat effective	Yes, the full cost is paid	0.7766
473	25-34	Bachelor_s degree or higher	White, Non-Hispanic	Female	$85,000 to $99,999	Married	Metro	Northeast	Working - as a paid employee	Yes	No, never	#NULL!	#NULL!	#NULL!	#NULL!	No	No	Yes	No	No	No	No	No	No	No	No		Yes	It varies from season to season	Don_t know	1.0765
474	55-64	Some college	2+ Races, Non-Hispanic	Female	$10,000 to $12,499	Widowed	Metro	West	Working - as a paid employee	No	Yes, every year	$0	No, no effect	No, no effect	Protect myself and others	#NULL!	#NULL!	#NULL!	#NULL!	#NULL!	#NULL!	#NULL!	#NULL!	#NULL!	#NULL!	#NULL!		Yes	Somewhat effective	Yes, the full cost is paid	0.3211
475	45-54	Some college	White, Non-Hispanic	Female	$40,000 to $49,999	Married	Non-Metro	Midwest	Working - as a paid employee	Yes	Yes, every year	Less than $30	No, no effect	No, no effect	Protect myself	#NULL!	#NULL!	#NULL!	#NULL!	#NULL!	#NULL!	#NULL!	#NULL!	#NULL!	#NULL!	#NULL!		Yes	Somewhat effective	Yes, but only part of the cost is paid	0.7381
476	25-34	Some college	White, Non-Hispanic	Female	$30,000 to $34,999	Living with partner	Metro	Northeast	Not working - looking for work	Yes	Yes, some years	$0	No, no effect	No, no effect	Protect myself	No	No	Yes	No	No	No	No	No	No	No	No		Yes	Somewhat effective	Yes, the full cost is paid	1.0237
477	75+	Bachelor_s degree or higher	White, Non-Hispanic	Male	$40,000 to $49,999	Married	Metro	South	Not working - retired	Yes	Yes, every year	$0	No, no effect	No, no effect	Protect myself and others	#NULL!	#NULL!	#NULL!	#NULL!	#NULL!	#NULL!	#NULL!	#NULL!	#NULL!	#NULL!	#NULL!		Yes	Very effective	Yes, the full cost is paid	0.5738
478	25-34	Some college	2+ Races, Non-Hispanic	Male	$50,000 to $59,999	Never married	Metro	Northeast	Not working - other	Yes	No, never	#NULL!	#NULL!	#NULL!	#NULL!	No	No	No	No	No	No	No	Yes	No	No	No		Yes	Don_t know	Don_t know	0.3103
479	25-34	Bachelor_s degree or higher	2+ Races, Non-Hispanic	Female	$125,000 to $149,999	Divorced	Metro	West	Working - as a paid employee	Yes	Yes, every year	$0	No, no effect	No, no effect	Protect myself and others	#NULL!	#NULL!	#NULL!	#NULL!	#NULL!	#NULL!	#NULL!	#NULL!	#NULL!	#NULL!	#NULL!		Yes	Somewhat effective	Yes, the full cost is paid	0.3224
480	65-74	Less than high school	Black, Non-Hispanic	Male	$12,500 to $14,999	Separated	Metro	South	Not working - retired	Yes	Yes, every year	$0	No, no effect	No, no effect	Protect myself and others	#NULL!	#NULL!	#NULL!	#NULL!	#NULL!	#NULL!	#NULL!	#NULL!	#NULL!	#NULL!	#NULL!		No	It varies from season to season	#NULL!	1.1503
481	75+	Less than high school	White, Non-Hispanic	Male	$15,000 to $19,999	Married	Non-Metro	South	Not working - disabled	Yes	Yes, every year	$0	Yes, more likely	Yes, more likely	Protect myself	#NULL!	#NULL!	#NULL!	#NULL!	#NULL!	#NULL!	#NULL!	#NULL!	#NULL!	#NULL!	#NULL!		Yes	Very effective	Yes, the full cost is paid	0.8301
482	65-74	Bachelor_s degree or higher	White, Non-Hispanic	Male	$85,000 to $99,999	Married	Metro	West	Working - as a paid employee	Yes	Yes, every year	More than $60	No, no effect	No, no effect	Protect myself	#NULL!	#NULL!	#NULL!	#NULL!	#NULL!	#NULL!	#NULL!	#NULL!	#NULL!	#NULL!	#NULL!		Yes	Somewhat effective	Yes, the full cost is paid	0.5662
483	65-74	Some college	White, Non-Hispanic	Male	$35,000 to $39,999	Married	Metro	Midwest	Not working - retired	Yes	Yes, some years	$0	No, no effect	No, no effect	Protect myself	No	Yes	No	No	No	No	No	No	No	No	No		Yes	Not effective	Don_t know	0.6797
484	75+	Less than high school	White, Non-Hispanic	Female	$40,000 to $49,999	Married	Metro	South	Not working - retired	Yes	Yes, every year	$0	No, no effect	No, no effect	Protect myself and others	#NULL!	#NULL!	#NULL!	#NULL!	#NULL!	#NULL!	#NULL!	#NULL!	#NULL!	#NULL!	#NULL!		Yes	Very effective	Yes, the full cost is paid	1.0919
485	35-44	Some college	White, Non-Hispanic	Female	$40,000 to $49,999	Married	Non-Metro	Midwest	Not working - other	Yes	No, never	#NULL!	#NULL!	#NULL!	#NULL!	No	No	No	No	Yes	No	No	No	No	No	No		Yes	Not effective	Yes, the full cost is paid	0.9869
486	35-44	Some college	Other, Non-Hispanic	Female	$125,000 to $149,999	Married	Metro	West	Working - as a paid employee	Yes	Yes, some years	$0	Yes, more likely	No, no effect	Protect myself and others	No	No	No	No	No	No	Yes	No	No	No	No		Yes	Somewhat effective	Yes, the full cost is paid	1.859
487	25-34	Bachelor_s degree or higher	White, Non-Hispanic	Female	$85,000 to $99,999	Never married	Metro	West	Working - as a paid employee	Yes	Yes, every year	$0	No, no effect	No, no effect	Protect myself and others	#NULL!	#NULL!	#NULL!	#NULL!	#NULL!	#NULL!	#NULL!	#NULL!	#NULL!	#NULL!	#NULL!		Yes	Very effective	Yes, the full cost is paid	1.058
488	65-74	Some college	White, Non-Hispanic	Female	$100,000 to $124,999	Married	Non-Metro	South	Not working - retired	Yes	Yes, every year	$0	Yes, more likely	No, no effect	Protect myself and others	#NULL!	#NULL!	#NULL!	#NULL!	#NULL!	#NULL!	#NULL!	#NULL!	#NULL!	#NULL!	#NULL!		Yes	Somewhat effective	Yes, the full cost is paid	0.8139
489	25-34	High school	Hispanic	Male	$60,000 to $74,999	Married	Non-Metro	Midwest	Not working - on temporary layoff from a job	Yes	No, never	#NULL!	#NULL!	#NULL!	#NULL!	No	No	No	No	No	No	No	Yes	No	No	No		No	Don_t know	#NULL!	1.1495
490	65-74	High school	White, Non-Hispanic	Male	$40,000 to $49,999	Widowed	Metro	South	Not working - retired	Yes	Yes, some years	Less than $30	No, no effect	No, no effect	Protect myself and others	No	No	No	No	No	No	No	Yes	No	No	No		Yes	Somewhat effective	Yes, but only part of the cost is paid	0.7007
491	65-74	High school	White, Non-Hispanic	Female	$100,000 to $124,999	Widowed	Metro	South	Not working - retired	Yes	Yes, every year	$0	No, no effect	No, no effect	Protect myself and others	#NULL!	#NULL!	#NULL!	#NULL!	#NULL!	#NULL!	#NULL!	#NULL!	#NULL!	#NULL!	#NULL!		Yes	It varies from season to season	Yes, the full cost is paid	0.8539
492	55-64	Some college	White, Non-Hispanic	Male	$100,000 to $124,999	Married	Metro	South	Working - as a paid employee	Yes	Yes, every year	$0	No, no effect	No, no effect	Protect myself and others	#NULL!	#NULL!	#NULL!	#NULL!	#NULL!	#NULL!	#NULL!	#NULL!	#NULL!	#NULL!	#NULL!		Yes	Very effective	Yes, the full cost is paid	0.8375
493	25-34	Some college	White, Non-Hispanic	Male	$35,000 to $39,999	Married	Metro	West	Working - as a paid employee	Yes	Yes, every year	$0	No, no effect	No, no effect	Protect myself and others	#NULL!	#NULL!	#NULL!	#NULL!	#NULL!	#NULL!	#NULL!	#NULL!	#NULL!	#NULL!	#NULL!		Yes	Somewhat effective	Yes, the full cost is paid	1.2665
494	25-34	Less than high school	Hispanic	Female	$10,000 to $12,499	Widowed	Metro	Midwest	Not working - looking for work	No	Yes, some years	$30 to $60	No, less likely	No, less likely	Protect others	No	No	No	Yes	No	No	No	No	No	No	No		No	Not effective	#NULL!	2.5953
495	18-24	Bachelor_s degree or higher	White, Non-Hispanic	Male	$100,000 to $124,999	Never married	Metro	South	Working - as a paid employee	Yes	Yes, every year	$0	Yes, more likely	No, no effect	Protect myself and others	#NULL!	#NULL!	#NULL!	#NULL!	#NULL!	#NULL!	#NULL!	#NULL!	#NULL!	#NULL!	#NULL!		Yes	Somewhat effective	Yes, the full cost is paid	1.2481
496	55-64	Some college	White, Non-Hispanic	Female	$150,000 to $174,999	Married	Metro	Northeast	Not working - on temporary layoff from a job	Yes	Yes, every year	$0	No, no effect	No, no effect	Protect myself	#NULL!	#NULL!	#NULL!	#NULL!	#NULL!	#NULL!	#NULL!	#NULL!	#NULL!	#NULL!	#NULL!		Yes	Somewhat effective	Yes, the full cost is paid	0.8234
497	75+	Bachelor_s degree or higher	White, Non-Hispanic	Male	$75,000 to $84,999	Married	Metro	South	Not working - retired	Yes	Yes, every year	$0	No, no effect	No, no effect	Protect myself	#NULL!	#NULL!	#NULL!	#NULL!	#NULL!	#NULL!	#NULL!	#NULL!	#NULL!	#NULL!	#NULL!		Yes	Somewhat effective	Yes, the full cost is paid	0.6172
498	65-74	High school	White, Non-Hispanic	Male	$60,000 to $74,999	Married	Metro	Midwest	Not working - retired	No	Yes, every year	$0	No, no effect	No, no effect	Protect myself	#NULL!	#NULL!	#NULL!	#NULL!	#NULL!	#NULL!	#NULL!	#NULL!	#NULL!	#NULL!	#NULL!		Yes	It varies from season to season	Yes, the full cost is paid	0.958
499	65-74	Bachelor_s degree or higher	Black, Non-Hispanic	Male	$85,000 to $99,999	Divorced	Metro	South	Not working - retired	Yes	Yes, every year	Don_t know	No, no effect	No, no effect	Protect myself	#NULL!	#NULL!	#NULL!	#NULL!	#NULL!	#NULL!	#NULL!	#NULL!	#NULL!	#NULL!	#NULL!		Yes	Somewhat effective	Yes, the full cost is paid	0.8366
500	45-54	High school	2+ Races, Non-Hispanic	Female	$75,000 to $84,999	Married	Metro	West	Not working - disabled	Yes	Yes, every year	$0	No, no effect	No, no effect	Protect myself and others	#NULL!	#NULL!	#NULL!	#NULL!	#NULL!	#NULL!	#NULL!	#NULL!	#NULL!	#NULL!	#NULL!		Yes	Very effective	Yes, the full cost is paid	0.2944
501	75+	High school	White, Non-Hispanic	Female	$15,000 to $19,999	Widowed	Metro	Midwest	Not working - retired	Yes	Yes, every year	$0	No, no effect	Yes, more likely	Protect myself and others	#NULL!	#NULL!	#NULL!	#NULL!	#NULL!	#NULL!	#NULL!	#NULL!	#NULL!	#NULL!	#NULL!		Yes	Very effective	Yes, the full cost is paid	0.6961
502	35-44	High school	Hispanic	Male	$10,000 to $12,499	Never married	Metro	South	Working - as a paid employee	Yes	No, never	#NULL!	#NULL!	#NULL!	#NULL!	No	No	Yes	No	No	No	No	No	No	No	No		Yes	Not effective	Yes, the full cost is paid	1.1876
503	55-64	Some college	White, Non-Hispanic	Female	$5,000 to $7,499	Never married	Non-Metro	South	Not working - disabled	No	Yes, every year	$0	Yes, more likely	Yes, more likely	Protect myself and others	#NULL!	#NULL!	#NULL!	#NULL!	#NULL!	#NULL!	#NULL!	#NULL!	#NULL!	#NULL!	#NULL!		Yes	Somewhat effective	Yes, the full cost is paid	0.9662
504	45-54	High school	White, Non-Hispanic	Female	$100,000 to $124,999	Married	Metro	West	Working - as a paid employee	Yes	Yes, some years	Less than $30	Yes, more likely	No, no effect	Protect myself and others	No	Yes	No	No	No	No	No	No	No	No	No		Yes	It varies from season to season	Yes, the full cost is paid	0.8306
505	18-24	High school	White, Non-Hispanic	Male	$100,000 to $124,999	Never married	Metro	South	Working - as a paid employee	Yes	No, never	#NULL!	#NULL!	#NULL!	#NULL!	Yes	Yes	No	No	No	No	Yes	No	No	No	No		No	Somewhat effective	#NULL!	1.524
506	75+	Some college	White, Non-Hispanic	Male	$85,000 to $99,999	Married	Non-Metro	South	Not working - retired	Yes	Yes, every year	$0	No, no effect	No, no effect	Protect myself and others	#NULL!	#NULL!	#NULL!	#NULL!	#NULL!	#NULL!	#NULL!	#NULL!	#NULL!	#NULL!	#NULL!		Yes	Somewhat effective	Yes, the full cost is paid	0.7183
507	55-64	Bachelor_s degree or higher	Other, Non-Hispanic	Male	$175,000 or more	Married	Metro	West	Working - self-employed	Yes	Yes, every year	$0	No, no effect	No, no effect	Protect myself and others	#NULL!	#NULL!	#NULL!	#NULL!	#NULL!	#NULL!	#NULL!	#NULL!	#NULL!	#NULL!	#NULL!		Yes	Somewhat effective	Yes, the full cost is paid	1.1093
508	55-64	High school	White, Non-Hispanic	Female	$75,000 to $84,999	Married	Non-Metro	South	Working - as a paid employee	Yes	No, never	#NULL!	#NULL!	#NULL!	#NULL!	No	Yes	Yes	No	No	No	No	No	No	No	No		Yes	Don_t know	Don_t know	0.8858
509	25-34	High school	White, Non-Hispanic	Male	$75,000 to $84,999	Never married	Metro	South	Working - as a paid employee	Yes	No, never	#NULL!	#NULL!	#NULL!	#NULL!	No	No	No	No	No	No	Yes	No	No	No	No		Yes	Not effective	Don_t know	1.0931
510	25-34	Bachelor_s degree or higher	White, Non-Hispanic	Female	$100,000 to $124,999	Married	Metro	West	Working - as a paid employee	Yes	Yes, every year	$0	No, no effect	No, no effect	Protect myself and others	#NULL!	#NULL!	#NULL!	#NULL!	#NULL!	#NULL!	#NULL!	#NULL!	#NULL!	#NULL!	#NULL!		Yes	It varies from season to season	Don_t know	0.9096
511	35-44	Bachelor_s degree or higher	Black, Non-Hispanic	Male	$40,000 to $49,999	Never married	Metro	West	Working - as a paid employee	Yes	No, never	#NULL!	#NULL!	#NULL!	#NULL!	No	No	No	No	Yes	No	No	No	No	No	No		Yes	It varies from season to season	Yes, the full cost is paid	1.035
512	55-64	Bachelor_s degree or higher	Other, Non-Hispanic	Female	$175,000 or more	Married	Metro	West	Working - as a paid employee	Yes	Yes, every year	Less than $30	No, no effect	No, no effect	Protect myself and others	#NULL!	#NULL!	#NULL!	#NULL!	#NULL!	#NULL!	#NULL!	#NULL!	#NULL!	#NULL!	#NULL!		Yes	Somewhat effective	Don_t know	1.1021
513	45-54	Bachelor_s degree or higher	White, Non-Hispanic	Male	$100,000 to $124,999	Married	Metro	Midwest	Working - as a paid employee	Yes	Yes, every year	$0	No, no effect	Yes, more likely	Protect myself	#NULL!	#NULL!	#NULL!	#NULL!	#NULL!	#NULL!	#NULL!	#NULL!	#NULL!	#NULL!	#NULL!		Yes	Somewhat effective	Yes, the full cost is paid	0.7008
514	45-54	Bachelor_s degree or higher	White, Non-Hispanic	Female	$85,000 to $99,999	Married	Metro	South	Not working - other	Yes	Yes, every year	Less than $30	Yes, more likely	No, no effect	Protect myself and others	#NULL!	#NULL!	#NULL!	#NULL!	#NULL!	#NULL!	#NULL!	#NULL!	#NULL!	#NULL!	#NULL!		Yes	Somewhat effective	Don_t know	0.7416
515	45-54	Bachelor_s degree or higher	White, Non-Hispanic	Male	$85,000 to $99,999	Married	Metro	South	Working - as a paid employee	Yes	Yes, some years	$0	No, no effect	Yes, more likely	Protect myself and others	No	Yes	No	No	No	No	No	Yes	No	Yes	No	Vaccines_ effectiveness varies by the year.	Yes	It varies from season to season	Yes, the full cost is paid	0.7039
516	55-64	High school	White, Non-Hispanic	Male	$85,000 to $99,999	Married	Metro	Northeast	Working - as a paid employee	Yes	Yes, some years	$0	No, no effect	No, no effect	Protect myself	No	No	No	No	No	No	Yes	Yes	No	No	No		Yes	Somewhat effective	Yes, the full cost is paid	0.7034
517	55-64	Some college	White, Non-Hispanic	Male	$35,000 to $39,999	Never married	Metro	South	Working - as a paid employee	No	No, never	#NULL!	#NULL!	#NULL!	#NULL!	No	No	No	No	No	No	No	Yes	No	No	No		Yes	Somewhat effective	Don_t know	1.1289
518	75+	Some college	White, Non-Hispanic	Male	$20,000 to $24,999	Divorced	Metro	West	Working - self-employed	Yes	Yes, every year	$0	No, no effect	Yes, more likely	Protect myself	#NULL!	#NULL!	#NULL!	#NULL!	#NULL!	#NULL!	#NULL!	#NULL!	#NULL!	#NULL!	#NULL!		Yes	Somewhat effective	Yes, the full cost is paid	0.5515
519	75+	Less than high school	White, Non-Hispanic	Male	$30,000 to $34,999	Married	Metro	South	Not working - retired	Yes	Yes, every year	$0	Yes, more likely	No, no effect	Protect myself and others	#NULL!	#NULL!	#NULL!	#NULL!	#NULL!	#NULL!	#NULL!	#NULL!	#NULL!	#NULL!	#NULL!		Yes	Somewhat effective	Yes, the full cost is paid	0.9636
520	65-74	Bachelor_s degree or higher	Other, Non-Hispanic	Male	$125,000 to $149,999	Married	Metro	Northeast	Not working - retired	Yes	Yes, every year	$0	Yes, more likely	No, less likely	Protect myself and others	#NULL!	#NULL!	#NULL!	#NULL!	#NULL!	#NULL!	#NULL!	#NULL!	#NULL!	#NULL!	#NULL!		Yes	Somewhat effective	Yes, the full cost is paid	0.9896
521	65-74	High school	White, Non-Hispanic	Male	$20,000 to $24,999	Married	Metro	Northeast	Not working - retired	Yes	No, never	#NULL!	#NULL!	#NULL!	#NULL!	Yes	No	No	No	No	No	No	No	No	No	No		Yes	Somewhat effective	Yes, but only part of the cost is paid	0.5759
522	75+	High school	White, Non-Hispanic	Male	$75,000 to $84,999	Widowed	Metro	Midwest	Not working - retired	Yes	Yes, every year	$0	No, no effect	No, no effect	Protect myself	#NULL!	#NULL!	#NULL!	#NULL!	#NULL!	#NULL!	#NULL!	#NULL!	#NULL!	#NULL!	#NULL!		Yes	Somewhat effective	Yes, the full cost is paid	0.7502
523	75+	Bachelor_s degree or higher	White, Non-Hispanic	Male	$150,000 to $174,999	Married	Metro	South	Not working - retired	Yes	Yes, every year	Don_t know	Yes, more likely	No, no effect	Protect myself and others	#NULL!	#NULL!	#NULL!	#NULL!	#NULL!	#NULL!	#NULL!	#NULL!	#NULL!	#NULL!	#NULL!		Yes	Very effective	Yes, but only part of the cost is paid	0.6172
524	65-74	High school	Hispanic	Female	$10,000 to $12,499	Divorced	Metro	South	Not working - retired	Yes	No, never	#NULL!	#NULL!	#NULL!	#NULL!	No	No	No	No	No	No	No	No	No	Yes	No	just never have	Yes	Don_t know	Don_t know	0.9278
525	18-24	High school	White, Non-Hispanic	Female	$5,000 to $7,499	Living with partner	Metro	Midwest	Working - as a paid employee	No	No, never	#NULL!	#NULL!	#NULL!	#NULL!	No	No	No	No	No	No	No	No	No	Yes	No	Dont want to	Yes	Somewhat effective	Yes, the full cost is paid	1.6644
526	55-64	High school	White, Non-Hispanic	Male	$30,000 to $34,999	Divorced	Metro	Northeast	Not working - disabled	Yes	Yes, every year	$0	No, no effect	No, no effect	Protect myself and others	#NULL!	#NULL!	#NULL!	#NULL!	#NULL!	#NULL!	#NULL!	#NULL!	#NULL!	#NULL!	#NULL!		Yes	Somewhat effective	Yes, the full cost is paid	0.654
527	45-54	Bachelor_s degree or higher	White, Non-Hispanic	Female	$100,000 to $124,999	Married	Metro	West	Not working - other	Yes	Yes, some years	Don_t know	Yes, more likely	No, no effect	Protect myself and others	No	No	No	No	No	No	No	Yes	No	No	No		Yes	Somewhat effective	Yes, the full cost is paid	0.6802
528	65-74	Some college	White, Non-Hispanic	Female	$40,000 to $49,999	Married	Metro	Midwest	Not working - retired	Yes	Yes, every year	$0	No, no effect	No, no effect	Protect myself and others	#NULL!	#NULL!	#NULL!	#NULL!	#NULL!	#NULL!	#NULL!	#NULL!	#NULL!	#NULL!	#NULL!		Yes	It varies from season to season	Yes, the full cost is paid	0.7702
529	25-34	Less than high school	White, Non-Hispanic	Male	Less than $5,000	Never married	Non-Metro	South	Not working - other	No	No, never	#NULL!	#NULL!	#NULL!	#NULL!	No	No	No	No	No	No	No	No	No	No	Yes		Yes	Don_t know	Don_t know	2.4337
530	25-34	Bachelor_s degree or higher	White, Non-Hispanic	Male	$25,000 to $29,999	Never married	Non-Metro	Midwest	Working - as a paid employee	Yes	Yes, every year	$0	No, no effect	No, no effect	Protect myself and others	#NULL!	#NULL!	#NULL!	#NULL!	#NULL!	#NULL!	#NULL!	#NULL!	#NULL!	#NULL!	#NULL!		Yes	Very effective	Yes, the full cost is paid	1.0441
531	25-34	Some college	White, Non-Hispanic	Female	$85,000 to $99,999	Living with partner	Non-Metro	Midwest	Working - as a paid employee	Yes	Yes, every year	$0	No, no effect	No, no effect	Protect myself and others	#NULL!	#NULL!	#NULL!	#NULL!	#NULL!	#NULL!	#NULL!	#NULL!	#NULL!	#NULL!	#NULL!		Yes	It varies from season to season	Yes, the full cost is paid	1.0614
532	65-74	High school	White, Non-Hispanic	Male	$50,000 to $59,999	Married	Metro	West	Not working - retired	Yes	Yes, every year	Less than $30	No, no effect	No, no effect	Protect myself and others	#NULL!	#NULL!	#NULL!	#NULL!	#NULL!	#NULL!	#NULL!	#NULL!	#NULL!	#NULL!	#NULL!		Yes	Somewhat effective	Yes, the full cost is paid	0.6089
533	75+	Bachelor_s degree or higher	White, Non-Hispanic	Male	$100,000 to $124,999	Married	Metro	Northeast	Not working - retired	Yes	Yes, every year	$0	Yes, more likely	Yes, more likely	Protect myself and others	#NULL!	#NULL!	#NULL!	#NULL!	#NULL!	#NULL!	#NULL!	#NULL!	#NULL!	#NULL!	#NULL!		Yes	Somewhat effective	Refused	0.576
534	45-54	Some college	White, Non-Hispanic	Male	$60,000 to $74,999	Married	Metro	South	Working - as a paid employee	Yes	No, never	#NULL!	#NULL!	#NULL!	#NULL!	No	No	No	No	No	No	No	Yes	No	No	No		Yes	Somewhat effective	Don_t know	0.7376
535	65-74	Some college	White, Non-Hispanic	Male	$30,000 to $34,999	Divorced	Metro	South	Working - self-employed	Yes	Yes, every year	$0	No, no effect	No, no effect	Protect myself and others	#NULL!	#NULL!	#NULL!	#NULL!	#NULL!	#NULL!	#NULL!	#NULL!	#NULL!	#NULL!	#NULL!		Yes	Somewhat effective	Yes, the full cost is paid	0.6827
536	45-54	Some college	White, Non-Hispanic	Male	$50,000 to $59,999	Married	Metro	Midwest	Working - as a paid employee	Yes	No, never	#NULL!	#NULL!	#NULL!	#NULL!	No	No	No	No	No	No	No	Yes	No	No	No		Yes	It varies from season to season	Don_t know	0.7343
537	25-34	Some college	White, Non-Hispanic	Female	$125,000 to $149,999	Married	Metro	Northeast	Not working - other	Yes	Yes, some years	$0	No, no effect	No, no effect	Protect myself and others	No	No	No	No	No	No	No	Yes	No	No	No		Yes	It varies from season to season	Yes, the full cost is paid	1.101
538	75+	Less than high school	White, Non-Hispanic	Male	$40,000 to $49,999	Married	Metro	West	Not working - retired	Yes	Yes, every year	$0	No, no effect	Refused	Protect myself and others	#NULL!	#NULL!	#NULL!	#NULL!	#NULL!	#NULL!	#NULL!	#NULL!	#NULL!	#NULL!	#NULL!		Yes	It varies from season to season	Yes, the full cost is paid	0.8839
539	35-44	Bachelor_s degree or higher	White, Non-Hispanic	Female	$30,000 to $34,999	Married	Metro	Northeast	Working - self-employed	Yes	Yes, every year	$0	Yes, more likely	No, no effect	Protect myself and others	#NULL!	#NULL!	#NULL!	#NULL!	#NULL!	#NULL!	#NULL!	#NULL!	#NULL!	#NULL!	#NULL!		Yes	Somewhat effective	Yes, the full cost is paid	0.8605
540	45-54	Some college	White, Non-Hispanic	Male	$60,000 to $74,999	Married	Non-Metro	Midwest	Working - as a paid employee	Yes	Yes, some years	Don_t know	No, no effect	No, no effect	Protect myself	No	No	No	No	No	No	No	No	No	Yes	No	The vaccine was offered at work & I signed up for it but no notifications were posted & many of us missed it!	Yes	Somewhat effective	Don_t know	0.6637
541	45-54	High school	Hispanic	Female	$85,000 to $99,999	Married	Metro	Northeast	Working - as a paid employee	Yes	Yes, every year	$0	No, no effect	No, no effect	Protect myself	#NULL!	#NULL!	#NULL!	#NULL!	#NULL!	#NULL!	#NULL!	#NULL!	#NULL!	#NULL!	#NULL!		Yes	Somewhat effective	Yes, the full cost is paid	1.1213
542	65-74	High school	White, Non-Hispanic	Male	$7,500 to $9,999	Widowed	Metro	Midwest	Not working - disabled	No	Yes, every year	$0	No, no effect	No, no effect	Protect myself	#NULL!	#NULL!	#NULL!	#NULL!	#NULL!	#NULL!	#NULL!	#NULL!	#NULL!	#NULL!	#NULL!		Yes	Somewhat effective	Yes, the full cost is paid	0.8906
543	55-64	Bachelor_s degree or higher	White, Non-Hispanic	Male	$100,000 to $124,999	Married	Metro	Northeast	Working - as a paid employee	Yes	Yes, some years	$30 to $60	No, no effect	Yes, more likely	Protect myself and others	No	No	Yes	No	Yes	No	Yes	No	No	No	No		Yes	Somewhat effective	Don_t know	0.657
544	35-44	Less than high school	Hispanic	Male	$30,000 to $34,999	Living with partner	Metro	West	Not working - disabled	Yes	Yes, some years	Less than $30	No, no effect	No, no effect	Protect myself and others	Yes	No	No	No	No	No	No	Yes	No	No	No		Yes	Somewhat effective	Yes, but only part of the cost is paid	1.7012
545	75+	Bachelor_s degree or higher	White, Non-Hispanic	Female	$75,000 to $84,999	Married	Metro	West	Not working - retired	No	No, never	#NULL!	#NULL!	#NULL!	#NULL!	No	No	No	No	Yes	No	Yes	No	No	No	No		Yes	Not effective	Don_t know	0.9301
546	55-64	Some college	White, Non-Hispanic	Male	$60,000 to $74,999	Married	Non-Metro	Northeast	Working - as a paid employee	Yes	No, never	#NULL!	#NULL!	#NULL!	#NULL!	No	Yes	No	No	No	No	No	No	No	No	No		Yes	It varies from season to season	Don_t know	0.5281
547	25-34	High school	White, Non-Hispanic	Female	$25,000 to $29,999	Married	Metro	South	Working - as a paid employee	Yes	No, never	#NULL!	#NULL!	#NULL!	#NULL!	No	No	No	No	No	No	No	No	No	No	Yes		Yes	It varies from season to season	Yes, the full cost is paid	1.1257
548	65-74	Some college	White, Non-Hispanic	Male	$175,000 or more	Married	Non-Metro	West	Not working - retired	Yes	Yes, every year	$0	No, no effect	No, no effect	Protect myself and others	#NULL!	#NULL!	#NULL!	#NULL!	#NULL!	#NULL!	#NULL!	#NULL!	#NULL!	#NULL!	#NULL!		Yes	Very effective	Yes, the full cost is paid	1.1521
549	35-44	Bachelor_s degree or higher	White, Non-Hispanic	Female	$60,000 to $74,999	Married	Non-Metro	South	Working - as a paid employee	Yes	Yes, every year	$0	No, no effect	No, no effect	Protect myself and others	#NULL!	#NULL!	#NULL!	#NULL!	#NULL!	#NULL!	#NULL!	#NULL!	#NULL!	#NULL!	#NULL!		Yes	It varies from season to season	Don_t know	0.8543
550	75+	Some college	White, Non-Hispanic	Male	$50,000 to $59,999	Married	Metro	Midwest	Not working - retired	Yes	Yes, every year	$0	No, no effect	No, no effect	Protect myself and others	#NULL!	#NULL!	#NULL!	#NULL!	#NULL!	#NULL!	#NULL!	#NULL!	#NULL!	#NULL!	#NULL!		Yes	Somewhat effective	Yes, the full cost is paid	0.6439
551	45-54	Bachelor_s degree or higher	Other, Non-Hispanic	Female	$125,000 to $149,999	Married	Metro	West	Not working - looking for work	Yes	Yes, every year	Less than $30	No, no effect	Yes, more likely	Protect myself and others	#NULL!	#NULL!	#NULL!	#NULL!	#NULL!	#NULL!	#NULL!	#NULL!	#NULL!	#NULL!	#NULL!		Yes	It varies from season to season	Yes, but only part of the cost is paid	1.1686
552	45-54	Some college	Hispanic	Male	$60,000 to $74,999	Never married	Metro	West	Working - self-employed	No	No, never	#NULL!	#NULL!	#NULL!	#NULL!	No	No	No	Yes	No	No	No	No	No	No	No		No	Somewhat effective	#NULL!	1.3016
553	55-64	Some college	2+ Races, Non-Hispanic	Female	$75,000 to $84,999	Married	Metro	South	Working - as a paid employee	Yes	Yes, every year	$0	No, less likely	Yes, more likely	Protect myself and others	#NULL!	#NULL!	#NULL!	#NULL!	#NULL!	#NULL!	#NULL!	#NULL!	#NULL!	#NULL!	#NULL!		Yes	Very effective	Yes, the full cost is paid	0.2949
554	35-44	Bachelor_s degree or higher	White, Non-Hispanic	Female	$85,000 to $99,999	Married	Metro	Midwest	Working - as a paid employee	Yes	No, never	#NULL!	#NULL!	#NULL!	#NULL!	No	No	No	No	No	No	No	No	No	Yes	No	I have a disease that may be impacted by the shot	Yes	Very effective	Yes, the full cost is paid	0.9871
555	18-24	High school	White, Non-Hispanic	Female	$60,000 to $74,999	Never married	Metro	South	Not working - other	Yes	Yes, some years	Less than $30	Yes, more likely	No, no effect	Protect myself and others	Yes	Yes	Yes	No	No	No	No	Yes	Yes	No	No		Yes	Somewhat effective	Don_t know	1.2404
556	65-74	High school	White, Non-Hispanic	Male	$60,000 to $74,999	Married	Metro	Northeast	Not working - retired	Yes	Yes, every year	$0	No, no effect	No, no effect	Protect myself and others	#NULL!	#NULL!	#NULL!	#NULL!	#NULL!	#NULL!	#NULL!	#NULL!	#NULL!	#NULL!	#NULL!		Yes	Very effective	Yes, the full cost is paid	0.6195
557	65-74	Bachelor_s degree or higher	White, Non-Hispanic	Male	$60,000 to $74,999	Married	Metro	West	Not working - retired	Yes	Yes, every year	Less than $30	No, no effect	No, no effect	Protect myself	#NULL!	#NULL!	#NULL!	#NULL!	#NULL!	#NULL!	#NULL!	#NULL!	#NULL!	#NULL!	#NULL!		Yes	Somewhat effective	Yes, but only part of the cost is paid	0.4987
558	25-34	Some college	White, Non-Hispanic	Female	$30,000 to $34,999	Never married	Metro	South	Not working - other	No	No, never	#NULL!	#NULL!	#NULL!	#NULL!	No	No	No	No	No	No	No	No	No	No	Yes		No	Refused	#NULL!	1.5901
559	25-34	High school	Black, Non-Hispanic	Male	$50,000 to $59,999	Never married	Metro	Northeast	Working - as a paid employee	Yes	Yes, some years	$30 to $60	No, less likely	No, less likely	Protect others	No	Yes	No	No	No	Yes	No	Yes	No	No	No		Yes	Not effective	Yes, but only part of the cost is paid	1.6982
560	25-34	Some college	Black, Non-Hispanic	Male	$20,000 to $24,999	Never married	Metro	Midwest	Working - as a paid employee	Yes	Yes, some years	$0	No, no effect	No, no effect	Protect myself and others	No	Yes	No	No	No	No	No	Yes	No	No	No		Yes	Don_t know	Don_t know	1.6408
561	75+	Some college	2+ Races, Non-Hispanic	Male	$40,000 to $49,999	Married	Metro	Midwest	Not working - retired	Yes	Yes, every year	$0	No, no effect	Yes, more likely	Protect myself and others	#NULL!	#NULL!	#NULL!	#NULL!	#NULL!	#NULL!	#NULL!	#NULL!	#NULL!	#NULL!	#NULL!		Yes	It varies from season to season	Yes, the full cost is paid	0.2705
562	65-74	Some college	White, Non-Hispanic	Male	$100,000 to $124,999	Married	Metro	South	Not working - retired	Yes	Yes, every year	Less than $30	No, no effect	No, no effect	Protect myself and others	#NULL!	#NULL!	#NULL!	#NULL!	#NULL!	#NULL!	#NULL!	#NULL!	#NULL!	#NULL!	#NULL!		Yes	Somewhat effective	Yes, the full cost is paid	0.7343
563	55-64	Some college	Black, Non-Hispanic	Male	$125,000 to $149,999	Married	Metro	Northeast	Not working - retired	Yes	Yes, every year	Don_t know	No, no effect	No, no effect	Protect myself	#NULL!	#NULL!	#NULL!	#NULL!	#NULL!	#NULL!	#NULL!	#NULL!	#NULL!	#NULL!	#NULL!		Yes	Somewhat effective	Yes, the full cost is paid	0.929
564	55-64	Some college	White, Non-Hispanic	Male	$100,000 to $124,999	Never married	Metro	Northeast	Not working - disabled	Yes	Yes, every year	$0	No, no effect	No, no effect	Protect myself and others	#NULL!	#NULL!	#NULL!	#NULL!	#NULL!	#NULL!	#NULL!	#NULL!	#NULL!	#NULL!	#NULL!		Yes	Very effective	Yes, the full cost is paid	0.6853
565	35-44	High school	White, Non-Hispanic	Female	$20,000 to $24,999	Married	Metro	South	Not working - other	Yes	No, never	#NULL!	#NULL!	#NULL!	#NULL!	No	No	Yes	No	No	No	No	No	No	No	No		Yes	It varies from season to season	Yes, the full cost is paid	0.9914
566	55-64	Bachelor_s degree or higher	White, Non-Hispanic	Female	$100,000 to $124,999	Married	Metro	Northeast	Working - as a paid employee	Yes	Yes, some years	$0	Yes, more likely	No, no effect	Protect myself and others	No	No	No	No	Yes	No	No	No	No	Yes	No	have cancer	Yes	Somewhat effective	Yes, the full cost is paid	0.6921
567	45-54	High school	White, Non-Hispanic	Male	$35,000 to $39,999	Never married	Metro	West	Working - as a paid employee	Yes	No, never	#NULL!	#NULL!	#NULL!	#NULL!	No	No	No	No	No	No	Yes	No	No	No	No		Yes	Somewhat effective	Yes, but only part of the cost is paid	0.7331
568	55-64	Bachelor_s degree or higher	White, Non-Hispanic	Female	$85,000 to $99,999	Married	Metro	South	Not working - retired	Yes	Yes, some years	Less than $30	No, no effect	No, no effect	Protect myself and others	No	No	No	No	No	No	No	Yes	No	No	No		Yes	Somewhat effective	No	0.6994
569	18-24	Less than high school	Hispanic	Male	$100,000 to $124,999	Never married	Metro	Northeast	Not working - other	Yes	Yes, some years	$0	Yes, more likely	No, less likely	Protect myself	No	No	No	No	No	No	No	No	No	No	Yes		Yes	Very effective	Yes, the full cost is paid	2.5953
570	65-74	High school	White, Non-Hispanic	Female	$30,000 to $34,999	Divorced	Metro	South	Working - as a paid employee	Yes	Yes, every year	$0	No, no effect	No, no effect	Protect myself	#NULL!	#NULL!	#NULL!	#NULL!	#NULL!	#NULL!	#NULL!	#NULL!	#NULL!	#NULL!	#NULL!		Yes	Very effective	Don_t know	0.794
571	65-74	Some college	White, Non-Hispanic	Male	$60,000 to $74,999	Married	Non-Metro	South	Not working - retired	Yes	Yes, some years	Less than $30	No, no effect	No, no effect	Protect myself and others	Yes	Yes	No	No	Yes	Yes	No	No	No	No	No		Yes	Somewhat effective	Yes, but only part of the cost is paid	0.6327
572	25-34	Bachelor_s degree or higher	White, Non-Hispanic	Female	$40,000 to $49,999	Married	Metro	Midwest	Not working - other	Yes	Yes, some years	$0	No, no effect	No, no effect	Protect myself and others	No	Yes	No	No	No	No	No	No	No	No	No		Yes	Somewhat effective	Yes, the full cost is paid	0.9178
573	45-54	Bachelor_s degree or higher	White, Non-Hispanic	Female	$125,000 to $149,999	Married	Metro	South	Working - as a paid employee	Yes	Yes, some years	$0	No, no effect	No, no effect	Protect myself	No	Yes	No	No	No	No	No	No	No	No	No		Yes	Somewhat effective	Yes, the full cost is paid	0.7416
574	55-64	Some college	White, Non-Hispanic	Male	$75,000 to $84,999	Married	Metro	Midwest	Working - as a paid employee	Yes	Yes, every year	$0	No, no effect	No, no effect	Protect myself	#NULL!	#NULL!	#NULL!	#NULL!	#NULL!	#NULL!	#NULL!	#NULL!	#NULL!	#NULL!	#NULL!		Yes	Very effective	Yes, the full cost is paid	0.731
575	75+	Bachelor_s degree or higher	White, Non-Hispanic	Male	$100,000 to $124,999	Married	Metro	Northeast	Not working - retired	Yes	Yes, every year	$0	No, no effect	No, no effect	Protect myself and others	#NULL!	#NULL!	#NULL!	#NULL!	#NULL!	#NULL!	#NULL!	#NULL!	#NULL!	#NULL!	#NULL!		Yes	It varies from season to season	Yes, the full cost is paid	0.576
576	45-54	Bachelor_s degree or higher	Hispanic	Female	$50,000 to $59,999	Never married	Metro	Midwest	Working - as a paid employee	Yes	Yes, every year	$0	No, no effect	No, no effect	Protect myself	#NULL!	#NULL!	#NULL!	#NULL!	#NULL!	#NULL!	#NULL!	#NULL!	#NULL!	#NULL!	#NULL!		Yes	Somewhat effective	Yes, the full cost is paid	0.8628
577	35-44	Bachelor_s degree or higher	White, Non-Hispanic	Female	$85,000 to $99,999	Married	Metro	Midwest	Working - as a paid employee	Yes	Yes, every year	Less than $30	No, no effect	No, no effect	Protect myself and others	#NULL!	#NULL!	#NULL!	#NULL!	#NULL!	#NULL!	#NULL!	#NULL!	#NULL!	#NULL!	#NULL!		No	Very effective	#NULL!	0.9871
578	75+	Bachelor_s degree or higher	White, Non-Hispanic	Female	$125,000 to $149,999	Married	Metro	Northeast	Not working - retired	Yes	Yes, every year	$0	No, no effect	No, no effect	Protect myself	#NULL!	#NULL!	#NULL!	#NULL!	#NULL!	#NULL!	#NULL!	#NULL!	#NULL!	#NULL!	#NULL!		Yes	Somewhat effective	Yes, the full cost is paid	0.6527
579	18-24	High school	White, Non-Hispanic	Male	$50,000 to $59,999	Never married	Metro	South	Not working - looking for work	Yes	No, never	#NULL!	#NULL!	#NULL!	#NULL!	No	Yes	No	No	Yes	No	No	No	No	No	No		Yes	Not effective	Don_t know	1.3423
581	25-34	Some college	White, Non-Hispanic	Male	$175,000 or more	Separated	Metro	South	Working - as a paid employee	No	Refused	#NULL!	#NULL!	#NULL!	#NULL!	#NULL!	#NULL!	#NULL!	#NULL!	#NULL!	#NULL!	#NULL!	#NULL!	#NULL!	#NULL!	#NULL!		Refused	Refused	#NULL!	2.1527
582	55-64	High school	White, Non-Hispanic	Male	$35,000 to $39,999	Never married	Metro	Northeast	Working - as a paid employee	Yes	Yes, every year	$0	Yes, more likely	Yes, more likely	Protect myself	#NULL!	#NULL!	#NULL!	#NULL!	#NULL!	#NULL!	#NULL!	#NULL!	#NULL!	#NULL!	#NULL!		Yes	Very effective	Yes, the full cost is paid	0.7459
583	55-64	Some college	White, Non-Hispanic	Female	$35,000 to $39,999	Divorced	Metro	Northeast	Not working - looking for work	Yes	Yes, every year	$0	No, no effect	No, no effect	Protect myself	#NULL!	#NULL!	#NULL!	#NULL!	#NULL!	#NULL!	#NULL!	#NULL!	#NULL!	#NULL!	#NULL!		Yes	It varies from season to season	Yes, the full cost is paid	0.7656
584	55-64	Some college	Other, Non-Hispanic	Male	$20,000 to $24,999	Married	Non-Metro	South	Not working - disabled	Yes	Yes, some years	$0	No, no effect	No, no effect	Protect myself	Yes	No	No	No	No	No	No	Yes	No	No	No		Yes	Somewhat effective	Yes, the full cost is paid	1.1524
585	45-54	Less than high school	Hispanic	Female	$40,000 to $49,999	Widowed	Metro	Northeast	Not working - on temporary layoff from a job	No	Yes, some years	Less than $30	No, less likely	No, less likely	Protect myself	No	Yes	No	No	No	No	No	No	No	No	No		No	Very effective	#NULL!	2.0786
586	45-54	Bachelor_s degree or higher	White, Non-Hispanic	Male	$100,000 to $124,999	Married	Metro	West	Working - self-employed	Yes	No, never	#NULL!	#NULL!	#NULL!	#NULL!	No	Yes	No	No	No	No	No	No	No	No	No		Yes	It varies from season to season	Don_t know	0.6457
587	25-34	Some college	White, Non-Hispanic	Male	$35,000 to $39,999	Married	Metro	Midwest	Not working - on temporary layoff from a job	Yes	Yes, some years	Less than $30	No, no effect	Yes, more likely	Protect myself	No	No	No	No	No	No	No	No	No	Yes	No	Idona	Yes	Somewhat effective	Yes, the full cost is paid	1.3745
588	55-64	Less than high school	White, Non-Hispanic	Male	$35,000 to $39,999	Married	Non-Metro	South	Not working - retired	Yes	Yes, every year	$0	Yes, more likely	Yes, more likely	Protect myself and others	#NULL!	#NULL!	#NULL!	#NULL!	#NULL!	#NULL!	#NULL!	#NULL!	#NULL!	#NULL!	#NULL!		Yes	Very effective	Yes, the full cost is paid	0.9426
589	65-74	Some college	Hispanic	Female	$25,000 to $29,999	Married	Metro	South	Not working - retired	Yes	Yes, every year	$0	No, no effect	No, no effect	Protect myself and others	#NULL!	#NULL!	#NULL!	#NULL!	#NULL!	#NULL!	#NULL!	#NULL!	#NULL!	#NULL!	#NULL!		Yes	Somewhat effective	Yes, the full cost is paid	1.0265
590	75+	High school	White, Non-Hispanic	Male	$50,000 to $59,999	Widowed	Metro	West	Not working - retired	Yes	Yes, every year	$0	No, no effect	No, no effect	Protect myself and others	#NULL!	#NULL!	#NULL!	#NULL!	#NULL!	#NULL!	#NULL!	#NULL!	#NULL!	#NULL!	#NULL!		Yes	It varies from season to season	Yes, the full cost is paid	0.6089
591	55-64	Some college	Black, Non-Hispanic	Female	$10,000 to $12,499	Divorced	Metro	Midwest	Working - as a paid employee	No	Yes, every year	$0	No, no effect	Yes, more likely	Protect myself and others	#NULL!	#NULL!	#NULL!	#NULL!	#NULL!	#NULL!	#NULL!	#NULL!	#NULL!	#NULL!	#NULL!		Yes	Somewhat effective	Yes, the full cost is paid	1.3329
592	55-64	High school	White, Non-Hispanic	Male	$100,000 to $124,999	Married	Metro	Northeast	Working - as a paid employee	Yes	Yes, every year	$0	No, no effect	No, no effect	Protect myself and others	#NULL!	#NULL!	#NULL!	#NULL!	#NULL!	#NULL!	#NULL!	#NULL!	#NULL!	#NULL!	#NULL!		Yes	Somewhat effective	Yes, the full cost is paid	0.8022
593	35-44	High school	White, Non-Hispanic	Male	$100,000 to $124,999	Married	Metro	South	Working - as a paid employee	Yes	No, never	#NULL!	#NULL!	#NULL!	#NULL!	No	Yes	No	No	No	No	No	No	No	No	No		Yes	It varies from season to season	Yes, the full cost is paid	1.0931
594	45-54	High school	White, Non-Hispanic	Male	$40,000 to $49,999	Married	Metro	Midwest	Not working - retired	Yes	Yes, every year	$0	Yes, more likely	No, less likely	Protect myself	#NULL!	#NULL!	#NULL!	#NULL!	#NULL!	#NULL!	#NULL!	#NULL!	#NULL!	#NULL!	#NULL!		Yes	Somewhat effective	Don_t know	0.7956
595	55-64	Bachelor_s degree or higher	White, Non-Hispanic	Male	$175,000 or more	Married	Metro	West	Not working - retired	Yes	Yes, some years	$0	No, no effect	No, no effect	Protect myself and others	No	No	Yes	No	No	No	No	Yes	No	Yes	No	my father probably died form Guillain_Barr� syndrome in 1976	Yes	Somewhat effective	Don_t know	0.6457
596	45-54	Some college	White, Non-Hispanic	Male	$60,000 to $74,999	Married	Metro	Northeast	Working - as a paid employee	Yes	Yes, some years	Less than $30	No, no effect	No, no effect	Protect myself	No	No	Yes	No	No	No	No	Yes	No	No	No		Yes	Somewhat effective	No	0.6885
597	65-74	Bachelor_s degree or higher	White, Non-Hispanic	Male	$100,000 to $124,999	Married	Metro	Midwest	Not working - retired	Yes	Yes, every year	$0	No, no effect	No, no effect	Protect myself	#NULL!	#NULL!	#NULL!	#NULL!	#NULL!	#NULL!	#NULL!	#NULL!	#NULL!	#NULL!	#NULL!		Yes	Somewhat effective	Yes, the full cost is paid	0.6144
598	65-74	Bachelor_s degree or higher	White, Non-Hispanic	Male	$75,000 to $84,999	Married	Non-Metro	South	Not working - retired	Yes	Yes, every year	$0	No, no effect	No, no effect	Protect myself	#NULL!	#NULL!	#NULL!	#NULL!	#NULL!	#NULL!	#NULL!	#NULL!	#NULL!	#NULL!	#NULL!		No	Somewhat effective	#NULL!	0.6038
599	45-54	Bachelor_s degree or higher	White, Non-Hispanic	Female	$100,000 to $124,999	Married	Non-Metro	West	Working - as a paid employee	Yes	Yes, every year	$0	No, no effect	No, no effect	Protect myself and others	#NULL!	#NULL!	#NULL!	#NULL!	#NULL!	#NULL!	#NULL!	#NULL!	#NULL!	#NULL!	#NULL!		Yes	Somewhat effective	Yes, the full cost is paid	1.1635
600	45-54	High school	White, Non-Hispanic	Female	$35,000 to $39,999	Divorced	Metro	Northeast	Not working - disabled	Yes	No, never	#NULL!	#NULL!	#NULL!	#NULL!	No	No	No	No	No	No	Yes	No	No	No	No		Yes	Not effective	No	0.7858
601	45-54	High school	White, Non-Hispanic	Female	$50,000 to $59,999	Married	Non-Metro	Northeast	Not working - other	Yes	No, never	#NULL!	#NULL!	#NULL!	#NULL!	No	Yes	No	No	Yes	No	No	No	No	No	No		Yes	It varies from season to season	Yes, but only part of the cost is paid	0.6512
602	75+	High school	White, Non-Hispanic	Female	$25,000 to $29,999	Divorced	Metro	Northeast	Not working - retired	Yes	No, never	#NULL!	#NULL!	#NULL!	#NULL!	No	No	No	No	Yes	No	No	No	No	Yes	No	Reaction to the shot	Yes	Don_t know	Yes, the full cost is paid	0.7411
603	65-74	Some college	White, Non-Hispanic	Female	$60,000 to $74,999	Married	Metro	South	Not working - retired	Yes	Yes, every year	$0	No, no effect	No, no effect	Protect myself and others	#NULL!	#NULL!	#NULL!	#NULL!	#NULL!	#NULL!	#NULL!	#NULL!	#NULL!	#NULL!	#NULL!		Yes	Very effective	Yes, the full cost is paid	0.7328
604	55-64	Bachelor_s degree or higher	White, Non-Hispanic	Male	$100,000 to $124,999	Married	Metro	West	Not working - retired	Yes	No, never	#NULL!	#NULL!	#NULL!	#NULL!	No	Yes	No	No	No	No	No	No	No	No	No		Yes	It varies from season to season	No	0.6457
605	55-64	Bachelor_s degree or higher	White, Non-Hispanic	Male	$60,000 to $74,999	Married	Non-Metro	Midwest	Working - as a paid employee	Yes	Yes, every year	$0	No, no effect	Yes, more likely	Protect myself and others	#NULL!	#NULL!	#NULL!	#NULL!	#NULL!	#NULL!	#NULL!	#NULL!	#NULL!	#NULL!	#NULL!		Yes	Somewhat effective	Yes, the full cost is paid	0.5579
606	45-54	Bachelor_s degree or higher	White, Non-Hispanic	Male	$175,000 or more	Married	Metro	South	Working - as a paid employee	Yes	No, never	#NULL!	#NULL!	#NULL!	#NULL!	No	No	No	No	No	No	No	Yes	No	No	No		Yes	Somewhat effective	Yes, the full cost is paid	0.7039
607	65-74	High school	White, Non-Hispanic	Female	$125,000 to $149,999	Married	Metro	Midwest	Not working - other	Yes	Yes, every year	$0	No, no effect	No, no effect	Protect myself and others	#NULL!	#NULL!	#NULL!	#NULL!	#NULL!	#NULL!	#NULL!	#NULL!	#NULL!	#NULL!	#NULL!		Yes	Somewhat effective	Yes, the full cost is paid	0.8501
609	45-54	Some college	Black, Non-Hispanic	Male	$15,000 to $19,999	Married	Non-Metro	South	Not working - retired	No	Yes, some years	$30 to $60	Yes, more likely	Yes, more likely	Protect myself and others	No	Yes	No	No	Yes	No	No	No	Yes	No	No		Yes	Somewhat effective	Yes, the full cost is paid	1.3183
610	55-64	High school	White, Non-Hispanic	Female	$85,000 to $99,999	Married	Non-Metro	South	Not working - retired	Yes	Yes, every year	$0	No, no effect	No, no effect	Protect myself and others	#NULL!	#NULL!	#NULL!	#NULL!	#NULL!	#NULL!	#NULL!	#NULL!	#NULL!	#NULL!	#NULL!		Yes	Somewhat effective	Yes, the full cost is paid	0.8858
611	45-54	High school	White, Non-Hispanic	Female	$60,000 to $74,999	Married	Metro	Northeast	Working - as a paid employee	Yes	Yes, every year	$0	Yes, more likely	Yes, more likely	Protect myself and others	#NULL!	#NULL!	#NULL!	#NULL!	#NULL!	#NULL!	#NULL!	#NULL!	#NULL!	#NULL!	#NULL!		Yes	Somewhat effective	Yes, the full cost is paid	0.7444
612	25-34	Bachelor_s degree or higher	White, Non-Hispanic	Female	$75,000 to $84,999	Living with partner	Metro	South	Working - as a paid employee	Yes	Yes, some years	Less than $30	Yes, more likely	No, no effect	Protect myself and others	No	No	No	No	No	No	No	Yes	No	No	No		Yes	Somewhat effective	Don_t know	1.1534
613	35-44	Less than high school	Hispanic	Male	$60,000 to $74,999	Married	Metro	West	Working - as a paid employee	Yes	Yes, every year	$30 to $60	No, less likely	Yes, more likely	Protect others	#NULL!	#NULL!	#NULL!	#NULL!	#NULL!	#NULL!	#NULL!	#NULL!	#NULL!	#NULL!	#NULL!		Yes	Very effective	Yes, but only part of the cost is paid	1.6116
614	55-64	High school	Hispanic	Male	$60,000 to $74,999	Never married	Metro	Midwest	Working - as a paid employee	Yes	No, never	#NULL!	#NULL!	#NULL!	#NULL!	No	No	Yes	No	No	No	No	No	No	No	No		Yes	Somewhat effective	Don_t know	0.8768
615	55-64	Some college	Hispanic	Female	$125,000 to $149,999	Married	Metro	South	Working - as a paid employee	Yes	Yes, every year	$0	No, no effect	Yes, more likely	Protect myself and others	#NULL!	#NULL!	#NULL!	#NULL!	#NULL!	#NULL!	#NULL!	#NULL!	#NULL!	#NULL!	#NULL!		Yes	Somewhat effective	Yes, the full cost is paid	1.104
616	65-74	Some college	Hispanic	Female	$30,000 to $34,999	Divorced	Metro	West	Working - as a paid employee	Yes	No, never	#NULL!	#NULL!	#NULL!	#NULL!	No	Yes	No	No	No	No	No	No	No	No	No		Yes	It varies from season to season	Don_t know	0.9416
617	45-54	Bachelor_s degree or higher	Other, Non-Hispanic	Male	$150,000 to $174,999	Married	Metro	Northeast	Working - as a paid employee	Yes	Yes, some years	$0	No, no effect	No, no effect	Protect myself	No	No	Yes	No	No	No	No	No	No	No	No		Yes	It varies from season to season	Yes, the full cost is paid	1.1287
618	25-34	Some college	White, Non-Hispanic	Male	$100,000 to $124,999	Never married	Metro	South	Working - as a paid employee	Yes	No, never	#NULL!	#NULL!	#NULL!	#NULL!	No	Yes	Yes	No	No	No	No	No	No	No	No		Yes	It varies from season to season	Yes, the full cost is paid	1.4849
619	35-44	High school	White, Non-Hispanic	Female	$15,000 to $19,999	Never married	Non-Metro	South	Working - as a paid employee	No	No, never	#NULL!	#NULL!	#NULL!	#NULL!	No	Yes	Yes	No	No	No	Yes	No	No	No	No		Yes	It varies from season to season	Yes, the full cost is paid	1.406
620	45-54	High school	White, Non-Hispanic	Male	$15,000 to $19,999	Never married	Metro	South	Working - self-employed	No	No, never	#NULL!	#NULL!	#NULL!	#NULL!	No	No	No	No	Yes	No	Yes	Yes	No	No	No		Yes	It varies from season to season	Don_t know	1.0203
621	55-64	High school	Hispanic	Female	$25,000 to $29,999	Never married	Metro	West	Not working - disabled	No	No, never	#NULL!	#NULL!	#NULL!	#NULL!	No	Yes	No	No	Yes	No	Yes	No	No	No	No		Yes	Not effective	Don_t know	1.4855
622	65-74	High school	White, Non-Hispanic	Male	$25,000 to $29,999	Married	Metro	South	Working - as a paid employee	Yes	No, never	#NULL!	#NULL!	#NULL!	#NULL!	No	Yes	No	No	No	No	No	No	No	No	No		Yes	Somewhat effective	Yes, but only part of the cost is paid	0.7007
623	35-44	High school	White, Non-Hispanic	Male	$60,000 to $74,999	Married	Metro	Northeast	Working - as a paid employee	Yes	No, never	#NULL!	#NULL!	#NULL!	#NULL!	No	No	No	No	No	No	No	No	No	Yes	No	I just dont get the shot when asked at the doctors office. I just say no thankyou	Yes	Somewhat effective	Yes, the full cost is paid	0.8986
624	25-34	Bachelor_s degree or higher	White, Non-Hispanic	Female	$150,000 to $174,999	Married	Metro	Northeast	Working - as a paid employee	Yes	Yes, some years	Don_t know	No, no effect	No, no effect	Protect myself and others	No	Yes	No	No	No	No	No	No	No	No	No		Yes	It varies from season to season	Yes, but only part of the cost is paid	0.9254
625	65-74	Bachelor_s degree or higher	Other, Non-Hispanic	Female	$175,000 or more	Married	Metro	West	Not working - retired	Yes	No, never	#NULL!	#NULL!	#NULL!	#NULL!	No	Yes	No	No	No	No	No	No	No	No	No		Yes	Somewhat effective	Don_t know	1.1021
626	65-74	High school	White, Non-Hispanic	Female	$50,000 to $59,999	Married	Metro	Midwest	Not working - other	Yes	Yes, every year	$0	No, no effect	No, no effect	Protect myself and others	#NULL!	#NULL!	#NULL!	#NULL!	#NULL!	#NULL!	#NULL!	#NULL!	#NULL!	#NULL!	#NULL!		Yes	It varies from season to season	Yes, the full cost is paid	0.7488
627	25-34	Some college	2+ Races, Non-Hispanic	Male	$40,000 to $49,999	Never married	Metro	West	Working - as a paid employee	Yes	No, never	#NULL!	#NULL!	#NULL!	#NULL!	No	Yes	No	No	No	No	Yes	Yes	No	No	No		Yes	Somewhat effective	Yes, the full cost is paid	0.322
628	65-74	High school	Black, Non-Hispanic	Female	$40,000 to $49,999	Never married	Metro	Midwest	Not working - retired	Yes	No, never	#NULL!	#NULL!	#NULL!	#NULL!	No	Yes	No	No	Yes	No	Yes	No	No	No	No		Yes	Don_t know	Yes, the full cost is paid	1.0715
629	55-64	Some college	White, Non-Hispanic	Female	$175,000 or more	Married	Non-Metro	Midwest	Not working - retired	Yes	No, never	#NULL!	#NULL!	#NULL!	#NULL!	No	Yes	Yes	No	No	No	Yes	No	No	No	No		Yes	Somewhat effective	Don_t know	0.7938
630	65-74	High school	White, Non-Hispanic	Female	$15,000 to $19,999	Married	Non-Metro	Northeast	Not working - retired	Yes	Yes, every year	$0	No, no effect	No, no effect	Protect myself	#NULL!	#NULL!	#NULL!	#NULL!	#NULL!	#NULL!	#NULL!	#NULL!	#NULL!	#NULL!	#NULL!		Yes	Very effective	Yes, the full cost is paid	0.5709
631	55-64	Some college	Hispanic	Male	$60,000 to $74,999	Married	Metro	South	Working - as a paid employee	Yes	Yes, every year	$0	No, no effect	No, no effect	Protect myself and others	#NULL!	#NULL!	#NULL!	#NULL!	#NULL!	#NULL!	#NULL!	#NULL!	#NULL!	#NULL!	#NULL!		Yes	Very effective	Yes, the full cost is paid	0.9787
632	25-34	Bachelor_s degree or higher	Black, Non-Hispanic	Female	$35,000 to $39,999	Never married	Metro	Northeast	Working - as a paid employee	Yes	Yes, every year	$0	Yes, more likely	Yes, more likely	Protect myself and others	#NULL!	#NULL!	#NULL!	#NULL!	#NULL!	#NULL!	#NULL!	#NULL!	#NULL!	#NULL!	#NULL!		Yes	Very effective	Yes, the full cost is paid	1.1664
633	75+	Less than high school	Hispanic	Female	$35,000 to $39,999	Married	Metro	West	Not working - retired	Yes	Yes, every year	$0	No, no effect	Yes, more likely	Protect myself	#NULL!	#NULL!	#NULL!	#NULL!	#NULL!	#NULL!	#NULL!	#NULL!	#NULL!	#NULL!	#NULL!		Yes	Very effective	Yes, the full cost is paid	1.329
634	25-34	Bachelor_s degree or higher	White, Non-Hispanic	Male	Less than $5,000	Divorced	Metro	South	Not working - looking for work	Yes	No, never	#NULL!	#NULL!	#NULL!	#NULL!	No	No	Yes	No	No	No	No	No	No	No	No		No	Don_t know	#NULL!	0.7331
635	55-64	Some college	White, Non-Hispanic	Female	$20,000 to $24,999	Never married	Metro	South	Not working - retired	No	No, never	#NULL!	#NULL!	#NULL!	#NULL!	No	No	No	No	No	No	Yes	Yes	No	No	No		Yes	Somewhat effective	Don_t know	0.9877
636	45-54	Bachelor_s degree or higher	Black, Non-Hispanic	Female	$100,000 to $124,999	Married	Metro	South	Working - as a paid employee	Yes	Yes, some years	Don_t know	No, no effect	No, no effect	Protect myself	No	No	Yes	No	No	No	Yes	Yes	No	No	No		Yes	Very effective	Yes, the full cost is paid	1.0052
637	45-54	Bachelor_s degree or higher	White, Non-Hispanic	Female	$125,000 to $149,999	Married	Metro	Northeast	Not working - looking for work	Yes	Yes, some years	$0	No, no effect	No, no effect	Protect myself and others	No	No	No	No	No	No	No	Yes	No	No	No		Yes	Very effective	Yes, the full cost is paid	0.6921
638	75+	Less than high school	White, Non-Hispanic	Male	$35,000 to $39,999	Married	Metro	Northeast	Not working - retired	Yes	Yes, every year	$0	Yes, more likely	No, no effect	Protect myself and others	#NULL!	#NULL!	#NULL!	#NULL!	#NULL!	#NULL!	#NULL!	#NULL!	#NULL!	#NULL!	#NULL!		Yes	Very effective	Yes, the full cost is paid	0.8993
639	45-54	Some college	White, Non-Hispanic	Male	$100,000 to $124,999	Married	Metro	Midwest	Working - as a paid employee	Yes	No, never	#NULL!	#NULL!	#NULL!	#NULL!	No	No	No	No	Yes	No	No	No	No	No	No		Yes	It varies from season to season	Yes, the full cost is paid	0.8337
640	65-74	Some college	White, Non-Hispanic	Female	$50,000 to $59,999	Divorced	Metro	West	Not working - disabled	Yes	Yes, some years	$0	No, no effect	Yes, more likely	Protect myself and others	Yes	Yes	No	Yes	No	No	No	Yes	No	No	No		Yes	It varies from season to season	Yes, the full cost is paid	0.6723
641	55-64	Bachelor_s degree or higher	White, Non-Hispanic	Female	$100,000 to $124,999	Married	Metro	Midwest	Not working - retired	Yes	Yes, some years	$0	No, less likely	No, no effect	Protect myself	No	Yes	No	No	No	No	No	No	No	No	No		Yes	It varies from season to season	Don_t know	0.7383
642	25-34	High school	White, Non-Hispanic	Male	$60,000 to $74,999	Never married	Metro	South	Working - as a paid employee	Yes	No, never	#NULL!	#NULL!	#NULL!	#NULL!	No	No	No	No	Yes	No	No	No	No	No	No		Yes	It varies from season to season	Yes, the full cost is paid	1.3423
643	45-54	Bachelor_s degree or higher	Black, Non-Hispanic	Male	$125,000 to $149,999	Married	Metro	Midwest	Working - as a paid employee	Yes	Yes, every year	$0	No, less likely	No, no effect	Refused	#NULL!	#NULL!	#NULL!	#NULL!	#NULL!	#NULL!	#NULL!	#NULL!	#NULL!	#NULL!	#NULL!		Yes	Somewhat effective	Yes, the full cost is paid	0.9499
644	25-34	Bachelor_s degree or higher	Black, Non-Hispanic	Male	$100,000 to $124,999	Married	Metro	South	Working - as a paid employee	Yes	Yes, some years	$0	No, no effect	No, no effect	Protect myself and others	No	Yes	No	No	No	No	Yes	Yes	No	No	No		Yes	It varies from season to season	Yes, the full cost is paid	1.6918
645	55-64	High school	White, Non-Hispanic	Female	Less than $5,000	Married	Metro	South	Working - as a paid employee	No	Yes, every year	Less than $30	No, less likely	No, no effect	Protect myself and others	#NULL!	#NULL!	#NULL!	#NULL!	#NULL!	#NULL!	#NULL!	#NULL!	#NULL!	#NULL!	#NULL!		Yes	Very effective	Yes, the full cost is paid	1.0749
646	45-54	High school	White, Non-Hispanic	Female	$100,000 to $124,999	Married	Metro	West	Not working - other	Yes	No, never	#NULL!	#NULL!	#NULL!	#NULL!	No	Yes	No	No	No	No	No	No	No	No	No		Yes	Somewhat effective	Don_t know	0.8306
647	45-54	Some college	White, Non-Hispanic	Male	$75,000 to $84,999	Married	Non-Metro	Midwest	Working - as a paid employee	Yes	Yes, every year	$0	No, no effect	No, no effect	Protect myself and others	#NULL!	#NULL!	#NULL!	#NULL!	#NULL!	#NULL!	#NULL!	#NULL!	#NULL!	#NULL!	#NULL!		Yes	Somewhat effective	Yes, the full cost is paid	0.7535
648	55-64	Bachelor_s degree or higher	White, Non-Hispanic	Female	$125,000 to $149,999	Married	Metro	South	Not working - retired	Yes	Yes, every year	$0	No, no effect	No, no effect	Protect myself	#NULL!	#NULL!	#NULL!	#NULL!	#NULL!	#NULL!	#NULL!	#NULL!	#NULL!	#NULL!	#NULL!		Yes	Very effective	Yes, the full cost is paid	0.6994
649	55-64	Some college	White, Non-Hispanic	Female	$125,000 to $149,999	Married	Metro	West	Working - as a paid employee	Yes	No, never	#NULL!	#NULL!	#NULL!	#NULL!	No	No	Yes	No	Yes	No	Yes	No	No	No	No		Yes	Somewhat effective	Don_t know	0.8093
650	65-74	High school	White, Non-Hispanic	Female	$35,000 to $39,999	Married	Non-Metro	South	Not working - retired	Yes	Yes, every year	$0	No, no effect	Yes, more likely	Protect myself and others	#NULL!	#NULL!	#NULL!	#NULL!	#NULL!	#NULL!	#NULL!	#NULL!	#NULL!	#NULL!	#NULL!		Yes	Somewhat effective	Yes, the full cost is paid	0.7767
651	65-74	High school	White, Non-Hispanic	Female	$60,000 to $74,999	Married	Metro	West	Not working - retired	Yes	Yes, every year	$0	No, no effect	No, no effect	Protect myself	#NULL!	#NULL!	#NULL!	#NULL!	#NULL!	#NULL!	#NULL!	#NULL!	#NULL!	#NULL!	#NULL!		Yes	Very effective	Yes, the full cost is paid	0.6899
652	65-74	Less than high school	Black, Non-Hispanic	Female	$15,000 to $19,999	Separated	Non-Metro	South	Not working - retired	No	No, never	#NULL!	#NULL!	#NULL!	#NULL!	No	No	No	No	No	No	No	Yes	No	No	No		Yes	Not effective	Yes, the full cost is paid	1.8485
653	35-44	Bachelor_s degree or higher	White, Non-Hispanic	Female	$150,000 to $174,999	Married	Metro	West	Working - as a paid employee	Yes	Yes, every year	$30 to $60	No, no effect	No, no effect	Protect myself and others	#NULL!	#NULL!	#NULL!	#NULL!	#NULL!	#NULL!	#NULL!	#NULL!	#NULL!	#NULL!	#NULL!		Yes	Somewhat effective	Yes, but only part of the cost is paid	0.9096
654	55-64	High school	White, Non-Hispanic	Male	$100,000 to $124,999	Married	Metro	South	Working - as a paid employee	Yes	Yes, every year	$0	No, no effect	No, no effect	Protect myself and others	#NULL!	#NULL!	#NULL!	#NULL!	#NULL!	#NULL!	#NULL!	#NULL!	#NULL!	#NULL!	#NULL!		Yes	Very effective	Yes, the full cost is paid	0.8595
655	35-44	High school	White, Non-Hispanic	Male	$40,000 to $49,999	Married	Metro	West	Working - as a paid employee	Yes	Yes, some years	$0	Yes, more likely	No, less likely	Protect myself and others	No	No	No	No	No	No	Yes	No	No	No	No		Yes	Somewhat effective	Yes, the full cost is paid	0.9324
656	45-54	High school	White, Non-Hispanic	Female	$50,000 to $59,999	Married	Metro	West	Working - as a paid employee	Yes	Yes, some years	Less than $30	No, no effect	No, no effect	Protect myself and others	Yes	Yes	No	No	No	No	No	No	No	No	No		Yes	It varies from season to season	Don_t know	0.7316
657	55-64	Some college	White, Non-Hispanic	Female	$20,000 to $24,999	Separated	Metro	Midwest	Working - as a paid employee	Yes	Yes, every year	$0	No, no effect	Refused	Refused	#NULL!	#NULL!	#NULL!	#NULL!	#NULL!	#NULL!	#NULL!	#NULL!	#NULL!	#NULL!	#NULL!		Yes	Very effective	No	0.7192
658	45-54	High school	White, Non-Hispanic	Female	$40,000 to $49,999	Married	Non-Metro	Northeast	Working - as a paid employee	No	No, never	#NULL!	#NULL!	#NULL!	#NULL!	No	No	No	No	No	No	No	No	No	Yes	No	did not know thereis a vaccine	Yes	Don_t know	Don_t know	0.9966
659	45-54	High school	White, Non-Hispanic	Male	$100,000 to $124,999	Married	Metro	Northeast	Working - as a paid employee	Yes	Yes, every year	$0	No, no effect	No, no effect	Protect myself	#NULL!	#NULL!	#NULL!	#NULL!	#NULL!	#NULL!	#NULL!	#NULL!	#NULL!	#NULL!	#NULL!		Yes	Somewhat effective	Yes, the full cost is paid	0.8022
660	65-74	High school	White, Non-Hispanic	Male	$35,000 to $39,999	Divorced	Metro	South	Not working - retired	Yes	Yes, every year	$0	No, no effect	No, no effect	Protect myself and others	#NULL!	#NULL!	#NULL!	#NULL!	#NULL!	#NULL!	#NULL!	#NULL!	#NULL!	#NULL!	#NULL!		Yes	It varies from season to season	Yes, the full cost is paid	0.7007
661	55-64	High school	Hispanic	Male	$50,000 to $59,999	Married	Metro	South	Working - as a paid employee	Yes	No, never	#NULL!	#NULL!	#NULL!	#NULL!	No	No	No	No	Yes	No	No	No	No	No	No		Yes	Refused	Don_t know	1.0045
662	25-34	Bachelor_s degree or higher	White, Non-Hispanic	Female	$75,000 to $84,999	Married	Metro	West	Working - as a paid employee	Yes	No, never	#NULL!	#NULL!	#NULL!	#NULL!	No	Yes	Yes	No	No	No	No	No	No	No	No		Yes	It varies from season to season	Don_t know	0.9096
663	55-64	High school	Other, Non-Hispanic	Male	$85,000 to $99,999	Widowed	Metro	Northeast	Working - as a paid employee	Yes	Yes, every year	Less than $30	Yes, more likely	Yes, more likely	Protect myself and others	#NULL!	#NULL!	#NULL!	#NULL!	#NULL!	#NULL!	#NULL!	#NULL!	#NULL!	#NULL!	#NULL!		Yes	Very effective	Yes, the full cost is paid	1.3782
664	65-74	High school	White, Non-Hispanic	Female	$60,000 to $74,999	Married	Metro	South	Not working - retired	Yes	Yes, every year	$0	No, no effect	No, no effect	Protect myself and others	#NULL!	#NULL!	#NULL!	#NULL!	#NULL!	#NULL!	#NULL!	#NULL!	#NULL!	#NULL!	#NULL!		Yes	It varies from season to season	Yes, the full cost is paid	0.7521
665	55-64	Some college	White, Non-Hispanic	Male	$60,000 to $74,999	Divorced	Metro	South	Working - as a paid employee	Yes	Yes, some years	$0	Yes, more likely	No, no effect	Protect myself and others	No	No	No	No	No	No	No	Yes	No	No	No		Yes	It varies from season to season	Yes, the full cost is paid	0.6467
666	45-54	High school	Other, Non-Hispanic	Male	$40,000 to $49,999	Married	Metro	Midwest	Working - self-employed	Yes	No, never	#NULL!	#NULL!	#NULL!	#NULL!	Yes	No	No	No	No	No	No	No	No	No	No		Yes	Don_t know	Don_t know	1.3668
667	55-64	Some college	Black, Non-Hispanic	Female	$60,000 to $74,999	Married	Metro	South	Working - self-employed	Yes	No, never	#NULL!	#NULL!	#NULL!	#NULL!	No	No	No	No	Yes	No	No	No	No	No	No		Yes	Don_t know	Yes, the full cost is paid	1.0533
668	65-74	Some college	White, Non-Hispanic	Male	$40,000 to $49,999	Married	Metro	South	Not working - retired	Yes	Yes, every year	$0	No, no effect	No, no effect	Protect myself	#NULL!	#NULL!	#NULL!	#NULL!	#NULL!	#NULL!	#NULL!	#NULL!	#NULL!	#NULL!	#NULL!		Yes	Somewhat effective	Yes, the full cost is paid	0.6827
669	45-54	Bachelor_s degree or higher	White, Non-Hispanic	Female	$175,000 or more	Married	Metro	South	Not working - looking for work	Yes	Yes, every year	$0	No, no effect	No, no effect	Protect myself and others	#NULL!	#NULL!	#NULL!	#NULL!	#NULL!	#NULL!	#NULL!	#NULL!	#NULL!	#NULL!	#NULL!		Yes	Very effective	Yes, the full cost is paid	0.7416
670	55-64	High school	White, Non-Hispanic	Female	$50,000 to $59,999	Married	Metro	Northeast	Working - as a paid employee	Yes	No, never	#NULL!	#NULL!	#NULL!	#NULL!	No	No	Yes	No	No	No	No	No	No	No	No		Yes	Somewhat effective	Don_t know	0.702
671	55-64	High school	White, Non-Hispanic	Male	$50,000 to $59,999	Divorced	Metro	Midwest	Working - as a paid employee	Yes	Yes, every year	Less than $30	No, no effect	Yes, more likely	Protect myself and others	#NULL!	#NULL!	#NULL!	#NULL!	#NULL!	#NULL!	#NULL!	#NULL!	#NULL!	#NULL!	#NULL!		Yes	Somewhat effective	Yes, the full cost is paid	0.6608
672	55-64	Bachelor_s degree or higher	White, Non-Hispanic	Female	$50,000 to $59,999	Divorced	Metro	Midwest	Working - as a paid employee	Yes	Yes, every year	$0	No, no effect	Yes, more likely	Protect myself	#NULL!	#NULL!	#NULL!	#NULL!	#NULL!	#NULL!	#NULL!	#NULL!	#NULL!	#NULL!	#NULL!		Yes	Very effective	Yes, the full cost is paid	0.6502
673	45-54	High school	Black, Non-Hispanic	Male	$30,000 to $34,999	Married	Metro	South	Not working - disabled	Yes	No, never	#NULL!	#NULL!	#NULL!	#NULL!	No	No	No	No	No	No	Yes	No	No	Yes	No	I just never thout about getting one.	Yes	Don_t know	Don_t know	1.0833
674	65-74	High school	White, Non-Hispanic	Female	$50,000 to $59,999	Married	Metro	South	Not working - retired	Yes	No, never	#NULL!	#NULL!	#NULL!	#NULL!	No	No	Yes	No	No	No	No	No	No	No	No		Yes	Somewhat effective	No	0.7521
675	35-44	Less than high school	Black, Non-Hispanic	Male	$75,000 to $84,999	Married	Metro	South	Working - as a paid employee	Yes	No, never	#NULL!	#NULL!	#NULL!	#NULL!	No	Yes	No	No	No	No	No	No	No	No	No		Yes	Somewhat effective	Yes, the full cost is paid	2.0377
676	45-54	Bachelor_s degree or higher	Hispanic	Male	$60,000 to $74,999	Divorced	Metro	Northeast	Working - as a paid employee	No	No, never	#NULL!	#NULL!	#NULL!	#NULL!	No	No	No	No	No	No	No	Yes	No	No	No		Yes	Somewhat effective	Don_t know	1.1131
677	75+	Bachelor_s degree or higher	White, Non-Hispanic	Male	$25,000 to $29,999	Divorced	Metro	Midwest	Not working - retired	No	No, never	#NULL!	#NULL!	#NULL!	#NULL!	No	No	Yes	No	No	No	No	No	No	No	No		Yes	Somewhat effective	Don_t know	0.8282
678	45-54	Bachelor_s degree or higher	White, Non-Hispanic	Male	$175,000 or more	Married	Metro	Midwest	Not working - retired	Yes	Yes, every year	Less than $30	Yes, more likely	No, no effect	Protect myself and others	#NULL!	#NULL!	#NULL!	#NULL!	#NULL!	#NULL!	#NULL!	#NULL!	#NULL!	#NULL!	#NULL!		Yes	Somewhat effective	Yes, the full cost is paid	0.7008
679	35-44	Bachelor_s degree or higher	Black, Non-Hispanic	Female	$100,000 to $124,999	Never married	Metro	Midwest	Not working - looking for work	Yes	No, never	#NULL!	#NULL!	#NULL!	#NULL!	No	Yes	No	No	Yes	No	Yes	No	No	No	No		Yes	It varies from season to season	Yes, the full cost is paid	1.3381
680	65-74	Less than high school	Other, Non-Hispanic	Female	$150,000 to $174,999	Married	Metro	Midwest	Working - self-employed	Yes	Yes, every year	$0	No, no effect	No, no effect	Protect myself and others	#NULL!	#NULL!	#NULL!	#NULL!	#NULL!	#NULL!	#NULL!	#NULL!	#NULL!	#NULL!	#NULL!		Yes	Very effective	Yes, the full cost is paid	2.0084
681	18-24	Some college	Black, Non-Hispanic	Female	$50,000 to $59,999	Never married	Metro	Northeast	Not working - other	Yes	Yes, every year	$0	Yes, more likely	No, no effect	Protect myself and others	#NULL!	#NULL!	#NULL!	#NULL!	#NULL!	#NULL!	#NULL!	#NULL!	#NULL!	#NULL!	#NULL!		Yes	Somewhat effective	Yes, the full cost is paid	1.5291
682	65-74	High school	White, Non-Hispanic	Male	$60,000 to $74,999	Married	Metro	West	Not working - retired	Yes	Yes, every year	$0	No, no effect	No, no effect	Protect myself and others	#NULL!	#NULL!	#NULL!	#NULL!	#NULL!	#NULL!	#NULL!	#NULL!	#NULL!	#NULL!	#NULL!		Yes	Somewhat effective	Yes, the full cost is paid	0.6089
683	35-44	High school	Black, Non-Hispanic	Female	$60,000 to $74,999	Married	Metro	Northeast	Not working - looking for work	Yes	Yes, every year	$0	No, less likely	Yes, more likely	Protect myself and others	#NULL!	#NULL!	#NULL!	#NULL!	#NULL!	#NULL!	#NULL!	#NULL!	#NULL!	#NULL!	#NULL!		Yes	Very effective	Yes, the full cost is paid	1.3491
684	25-34	Bachelor_s degree or higher	White, Non-Hispanic	Female	$75,000 to $84,999	Married	Metro	South	Working - as a paid employee	Yes	Yes, some years	$0	Yes, more likely	Yes, more likely	Protect myself and others	No	Yes	No	No	No	No	No	No	No	No	No		Yes	Somewhat effective	Yes, the full cost is paid	1.1534
685	18-24	High school	White, Non-Hispanic	Male	$85,000 to $99,999	Never married	Metro	Northeast	Working - as a paid employee	Yes	No, never	#NULL!	#NULL!	#NULL!	#NULL!	No	No	No	No	No	No	No	No	No	Yes	No	Do not believe in them	Yes	Not effective	Don_t know	1.4224
686	65-74	High school	White, Non-Hispanic	Female	$25,000 to $29,999	Married	Metro	Northeast	Not working - retired	Yes	No, never	#NULL!	#NULL!	#NULL!	#NULL!	No	No	No	No	No	No	No	Yes	No	No	No		Yes	Somewhat effective	Yes, the full cost is paid	0.7411
687	75+	Bachelor_s degree or higher	White, Non-Hispanic	Male	$75,000 to $84,999	Married	Metro	West	Not working - retired	Yes	Yes, every year	$0	Yes, more likely	No, no effect	Protect myself and others	#NULL!	#NULL!	#NULL!	#NULL!	#NULL!	#NULL!	#NULL!	#NULL!	#NULL!	#NULL!	#NULL!		Yes	Very effective	Don_t know	0.5662
688	65-74	Bachelor_s degree or higher	White, Non-Hispanic	Male	$35,000 to $39,999	Widowed	Metro	West	Not working - retired	Yes	Yes, some years	Don_t know	No, no effect	No, no effect	Protect myself and others	Yes	Yes	No	No	No	No	No	Yes	No	No	No		Yes	Somewhat effective	Yes, the full cost is paid	0.5264
689	65-74	Bachelor_s degree or higher	White, Non-Hispanic	Female	$175,000 or more	Divorced	Metro	South	Working - self-employed	Yes	Yes, every year	Don_t know	No, no effect	No, no effect	Protect myself and others	#NULL!	#NULL!	#NULL!	#NULL!	#NULL!	#NULL!	#NULL!	#NULL!	#NULL!	#NULL!	#NULL!		Yes	It varies from season to season	Don_t know	0.6994
690	35-44	Bachelor_s degree or higher	White, Non-Hispanic	Male	$175,000 or more	Married	Metro	Midwest	Working - as a paid employee	Yes	No, never	#NULL!	#NULL!	#NULL!	#NULL!	No	No	No	No	Yes	No	No	No	No	No	No		Yes	Somewhat effective	Yes, the full cost is paid	0.8913
691	45-54	Bachelor_s degree or higher	White, Non-Hispanic	Male	$100,000 to $124,999	Married	Metro	Northeast	Working - as a paid employee	Yes	Yes, every year	$0	No, no effect	No, no effect	Protect myself and others	#NULL!	#NULL!	#NULL!	#NULL!	#NULL!	#NULL!	#NULL!	#NULL!	#NULL!	#NULL!	#NULL!		Yes	Somewhat effective	Yes, the full cost is paid	0.657
692	45-54	Less than high school	White, Non-Hispanic	Male	$100,000 to $124,999	Married	Metro	Northeast	Working - as a paid employee	Yes	Yes, every year	$0	No, no effect	No, no effect	Protect myself	#NULL!	#NULL!	#NULL!	#NULL!	#NULL!	#NULL!	#NULL!	#NULL!	#NULL!	#NULL!	#NULL!		Yes	Somewhat effective	Yes, the full cost is paid	1.1032
693	45-54	High school	Black, Non-Hispanic	Male	$20,000 to $24,999	Married	Non-Metro	South	Not working - looking for work	No	No, never	#NULL!	#NULL!	#NULL!	#NULL!	No	No	No	No	Yes	No	No	No	No	No	No		No	It varies from season to season	#NULL!	1.353
694	25-34	High school	White, Non-Hispanic	Female	$40,000 to $49,999	Married	Non-Metro	West	Not working - other	Yes	No, never	#NULL!	#NULL!	#NULL!	#NULL!	No	No	No	No	No	No	Yes	No	No	No	No		Yes	It varies from season to season	Don_t know	1.7663
695	25-34	High school	White, Non-Hispanic	Male	$40,000 to $49,999	Never married	Metro	South	Working - as a paid employee	Yes	No, never	#NULL!	#NULL!	#NULL!	#NULL!	No	No	Yes	No	No	No	No	No	No	No	No		No	Don_t know	#NULL!	1.417
696	45-54	Bachelor_s degree or higher	White, Non-Hispanic	Female	$125,000 to $149,999	Married	Metro	Northeast	Working - as a paid employee	Yes	Yes, every year	$0	No, no effect	No, no effect	Protect myself	#NULL!	#NULL!	#NULL!	#NULL!	#NULL!	#NULL!	#NULL!	#NULL!	#NULL!	#NULL!	#NULL!		Yes	Somewhat effective	Yes, the full cost is paid	0.6921
697	25-34	Bachelor_s degree or higher	White, Non-Hispanic	Male	$75,000 to $84,999	Never married	Metro	Midwest	Working - as a paid employee	Yes	No, never	#NULL!	#NULL!	#NULL!	#NULL!	No	No	No	No	Yes	No	No	No	No	No	No		Yes	It varies from season to season	Yes, the full cost is paid	1.2425
698	55-64	Bachelor_s degree or higher	White, Non-Hispanic	Female	$85,000 to $99,999	Never married	Metro	West	Not working - retired	Yes	Yes, some years	$0	No, no effect	No, no effect	Protect myself	No	Yes	Yes	No	Yes	No	No	Yes	No	No	No		Yes	Somewhat effective	Yes, the full cost is paid	0.6802
699	65-74	High school	White, Non-Hispanic	Female	$10,000 to $12,499	Divorced	Non-Metro	South	Not working - retired	No	Yes, every year	$0	No, no effect	No, no effect	Protect myself and others	#NULL!	#NULL!	#NULL!	#NULL!	#NULL!	#NULL!	#NULL!	#NULL!	#NULL!	#NULL!	#NULL!		Yes	Very effective	Yes, the full cost is paid	0.9917
700	55-64	High school	White, Non-Hispanic	Female	$60,000 to $74,999	Married	Non-Metro	Midwest	Working - as a paid employee	Yes	No, never	#NULL!	#NULL!	#NULL!	#NULL!	No	No	No	No	No	No	No	Yes	No	No	No		Yes	Somewhat effective	Don_t know	0.7176
701	45-54	Bachelor_s degree or higher	White, Non-Hispanic	Female	$175,000 or more	Married	Metro	Northeast	Working - self-employed	Yes	No, never	#NULL!	#NULL!	#NULL!	#NULL!	No	No	Yes	No	No	No	Yes	No	No	Yes	No	I don_t necessarily trust the medical community or the shot itself.	Yes	It varies from season to season	Yes, the full cost is paid	0.6921
702	65-74	High school	White, Non-Hispanic	Female	$30,000 to $34,999	Married	Metro	South	Not working - disabled	Yes	Yes, every year	$0	No, no effect	No, no effect	Protect myself and others	#NULL!	#NULL!	#NULL!	#NULL!	#NULL!	#NULL!	#NULL!	#NULL!	#NULL!	#NULL!	#NULL!		Yes	Very effective	Yes, the full cost is paid	0.794
703	45-54	Some college	White, Non-Hispanic	Female	$60,000 to $74,999	Married	Metro	Northeast	Working - as a paid employee	Yes	Yes, every year	$0	Yes, more likely	Yes, more likely	Protect myself and others	#NULL!	#NULL!	#NULL!	#NULL!	#NULL!	#NULL!	#NULL!	#NULL!	#NULL!	#NULL!	#NULL!		Yes	Very effective	Yes, the full cost is paid	0.7253
704	65-74	Bachelor_s degree or higher	White, Non-Hispanic	Male	$100,000 to $124,999	Married	Metro	South	Not working - retired	Yes	Yes, some years	$0	No, no effect	No, no effect	Protect myself and others	No	Yes	Yes	No	No	No	No	Yes	No	No	No		Yes	Somewhat effective	Yes, the full cost is paid	0.6172
705	25-34	Some college	White, Non-Hispanic	Female	$35,000 to $39,999	Never married	Metro	Midwest	Working - as a paid employee	Yes	No, never	#NULL!	#NULL!	#NULL!	#NULL!	No	Yes	No	No	Yes	No	Yes	No	No	No	No		Yes	It varies from season to season	Yes, but only part of the cost is paid	1.0919
706	45-54	Bachelor_s degree or higher	White, Non-Hispanic	Male	$85,000 to $99,999	Divorced	Metro	Northeast	Working - as a paid employee	Yes	No, never	#NULL!	#NULL!	#NULL!	#NULL!	No	No	No	No	No	No	No	Yes	No	No	No		Yes	Somewhat effective	Yes, the full cost is paid	0.657
707	45-54	Bachelor_s degree or higher	White, Non-Hispanic	Male	$100,000 to $124,999	Married	Metro	Northeast	Working - self-employed	Yes	Yes, every year	Less than $30	No, no effect	No, no effect	Protect myself	#NULL!	#NULL!	#NULL!	#NULL!	#NULL!	#NULL!	#NULL!	#NULL!	#NULL!	#NULL!	#NULL!		Yes	Somewhat effective	Yes, but only part of the cost is paid	0.657
708	55-64	High school	White, Non-Hispanic	Male	$85,000 to $99,999	Married	Metro	South	Working - as a paid employee	Yes	Yes, every year	Less than $30	No, no effect	No, no effect	Protect myself and others	#NULL!	#NULL!	#NULL!	#NULL!	#NULL!	#NULL!	#NULL!	#NULL!	#NULL!	#NULL!	#NULL!		Yes	Somewhat effective	Yes, but only part of the cost is paid	0.8595
709	35-44	Bachelor_s degree or higher	Hispanic	Male	$60,000 to $74,999	Married	Metro	Midwest	Working - as a paid employee	Yes	Yes, every year	$0	No, no effect	No, no effect	Protect myself and others	#NULL!	#NULL!	#NULL!	#NULL!	#NULL!	#NULL!	#NULL!	#NULL!	#NULL!	#NULL!	#NULL!		Yes	Somewhat effective	Yes, the full cost is paid	1.0416
710	45-54	High school	White, Non-Hispanic	Male	$100,000 to $124,999	Married	Metro	South	Working - self-employed	Yes	No, never	#NULL!	#NULL!	#NULL!	#NULL!	No	Yes	No	No	No	No	No	No	No	No	No		Yes	Not effective	Don_t know	0.8595
711	65-74	Bachelor_s degree or higher	White, Non-Hispanic	Male	$75,000 to $84,999	Never married	Metro	West	Working - self-employed	Yes	Yes, every year	$0	No, no effect	No, no effect	Protect myself	#NULL!	#NULL!	#NULL!	#NULL!	#NULL!	#NULL!	#NULL!	#NULL!	#NULL!	#NULL!	#NULL!		Yes	It varies from season to season	Yes, the full cost is paid	0.5662
712	75+	High school	White, Non-Hispanic	Female	$15,000 to $19,999	Married	Non-Metro	Midwest	Not working - retired	Yes	Yes, every year	$0	No, no effect	No, no effect	Protect myself and others	#NULL!	#NULL!	#NULL!	#NULL!	#NULL!	#NULL!	#NULL!	#NULL!	#NULL!	#NULL!	#NULL!		Yes	Very effective	Yes, the full cost is paid	0.6291
713	65-74	High school	White, Non-Hispanic	Female	$125,000 to $149,999	Married	Metro	Midwest	Not working - other	Yes	Yes, every year	$0	Yes, more likely	Yes, more likely	Protect myself	#NULL!	#NULL!	#NULL!	#NULL!	#NULL!	#NULL!	#NULL!	#NULL!	#NULL!	#NULL!	#NULL!		Yes	Very effective	Yes, the full cost is paid	0.8501
714	18-24	Some college	White, Non-Hispanic	Female	$125,000 to $149,999	Never married	Metro	Northeast	Working - as a paid employee	Yes	Yes, some years	Less than $30	No, less likely	No, no effect	Protect myself and others	No	No	No	No	No	No	No	Yes	No	No	No		Yes	Very effective	No	1.2807
715	35-44	Bachelor_s degree or higher	White, Non-Hispanic	Female	$50,000 to $59,999	Married	Metro	Midwest	Working - as a paid employee	Yes	Yes, every year	$0	Yes, more likely	No, no effect	Protect myself and others	#NULL!	#NULL!	#NULL!	#NULL!	#NULL!	#NULL!	#NULL!	#NULL!	#NULL!	#NULL!	#NULL!		Yes	Very effective	Yes, the full cost is paid	0.8694
716	45-54	Bachelor_s degree or higher	Hispanic	Male	$100,000 to $124,999	Divorced	Metro	South	Not working - other	Yes	Yes, every year	$0	No, no effect	No, no effect	Protect myself and others	#NULL!	#NULL!	#NULL!	#NULL!	#NULL!	#NULL!	#NULL!	#NULL!	#NULL!	#NULL!	#NULL!		Yes	Somewhat effective	Yes, the full cost is paid	0.934
718	35-44	High school	White, Non-Hispanic	Male	$50,000 to $59,999	Married	Metro	West	Working - as a paid employee	Yes	No, never	#NULL!	#NULL!	#NULL!	#NULL!	No	No	Yes	No	No	No	Yes	Yes	No	No	No		No	Don_t know	#NULL!	0.8832
719	45-54	Some college	White, Non-Hispanic	Female	$50,000 to $59,999	Never married	Metro	South	Working - as a paid employee	Yes	No, never	#NULL!	#NULL!	#NULL!	#NULL!	No	No	No	No	No	No	No	Yes	No	No	No		Yes	Don_t know	Don_t know	0.7771
720	25-34	Some college	Black, Non-Hispanic	Male	$5,000 to $7,499	Living with partner	Metro	Northeast	Working - as a paid employee	Yes	Yes, some years	Don_t know	No, less likely	No, less likely	Protect myself	No	No	No	No	No	No	Yes	No	No	No	No		Yes	Don_t know	Don_t know	1.5382
721	18-24	High school	White, Non-Hispanic	Female	$12,500 to $14,999	Never married	Metro	South	Working - as a paid employee	Yes	No, never	#NULL!	#NULL!	#NULL!	#NULL!	No	No	No	No	No	No	Yes	No	No	No	No		Yes	Very effective	Yes, the full cost is paid	1.1532
722	55-64	High school	Black, Non-Hispanic	Male	$50,000 to $59,999	Married	Metro	Midwest	Not working - disabled	Yes	No, never	#NULL!	#NULL!	#NULL!	#NULL!	No	Yes	Yes	No	No	No	No	No	No	No	No		Yes	It varies from season to season	Yes, the full cost is paid	1.0216
723	45-54	High school	Black, Non-Hispanic	Female	$10,000 to $12,499	Never married	Metro	West	Working - as a paid employee	Yes	No, never	#NULL!	#NULL!	#NULL!	#NULL!	Yes	No	No	No	No	No	No	No	No	No	No		Yes	Don_t know	No	0.9219
724	65-74	High school	White, Non-Hispanic	Male	$25,000 to $29,999	Divorced	Non-Metro	South	Not working - retired	Yes	No, never	#NULL!	#NULL!	#NULL!	#NULL!	No	Yes	No	No	Yes	No	No	No	No	No	No		Yes	Not effective	Don_t know	0.6854
725	25-34	Less than high school	Hispanic	Male	Less than $5,000	Never married	Metro	Northeast	Not working - other	Yes	No, never	#NULL!	#NULL!	#NULL!	#NULL!	Yes	Yes	Yes	Yes	Yes	Yes	Yes	Yes	Yes	No	No		No	Don_t know	#NULL!	2.1251
726	65-74	High school	Black, Non-Hispanic	Female	$50,000 to $59,999	Married	Metro	Midwest	Not working - retired	Yes	No, never	#NULL!	#NULL!	#NULL!	#NULL!	No	No	No	No	Yes	No	No	No	No	No	No		Yes	It varies from season to season	Yes, the full cost is paid	1.015
727	45-54	Bachelor_s degree or higher	White, Non-Hispanic	Female	$100,000 to $124,999	Married	Metro	Midwest	Working - as a paid employee	Yes	Yes, some years	$0	No, no effect	No, no effect	Protect myself and others	No	No	No	No	No	No	Yes	No	No	Yes	No	I get physically sick when I get a shot or have blood drawn. Always vomit or faint.	Yes	It varies from season to season	Yes, the full cost is paid	0.7383
728	55-64	Bachelor_s degree or higher	Other, Non-Hispanic	Female	$100,000 to $124,999	Married	Metro	Northeast	Working - as a paid employee	Yes	Yes, every year	$0	No, no effect	Yes, more likely	Protect myself and others	#NULL!	#NULL!	#NULL!	#NULL!	#NULL!	#NULL!	#NULL!	#NULL!	#NULL!	#NULL!	#NULL!		Yes	Somewhat effective	Yes, the full cost is paid	1.189
729	55-64	Some college	White, Non-Hispanic	Male	$100,000 to $124,999	Divorced	Metro	Midwest	Working - as a paid employee	Yes	No, never	#NULL!	#NULL!	#NULL!	#NULL!	Yes	No	No	No	Yes	No	No	No	No	No	No		Yes	Somewhat effective	Yes, but only part of the cost is paid	0.8337
730	35-44	Some college	White, Non-Hispanic	Male	$85,000 to $99,999	Married	Non-Metro	West	Working - as a paid employee	Yes	Yes, some years	Don_t know	No, no effect	No, no effect	Protect myself and others	No	No	No	No	No	No	No	Yes	No	No	No		Yes	Somewhat effective	Don_t know	1.6712
731	75+	Less than high school	Hispanic	Female	$75,000 to $84,999	Divorced	Metro	Midwest	Not working - retired	Yes	No, never	#NULL!	#NULL!	#NULL!	#NULL!	No	No	No	No	No	No	No	Yes	No	No	No		No	Not effective	#NULL!	1.5512
732	65-74	High school	White, Non-Hispanic	Female	$75,000 to $84,999	Married	Metro	Northeast	Not working - disabled	Yes	No, never	#NULL!	#NULL!	#NULL!	#NULL!	No	No	Yes	No	No	No	No	No	No	No	No		Yes	Don_t know	Don_t know	0.797
733	25-34	Some college	White, Non-Hispanic	Female	$15,000 to $19,999	Never married	Metro	Northeast	Not working - disabled	Yes	No, never	#NULL!	#NULL!	#NULL!	#NULL!	No	No	No	No	No	No	No	No	No	Yes	No	I don_t like vaccines	Yes	Not effective	Don_t know	1.0487
734	75+	High school	White, Non-Hispanic	Female	$30,000 to $34,999	Widowed	Metro	Midwest	Not working - retired	No	Yes, every year	$0	Yes, more likely	No, no effect	Protect myself and others	#NULL!	#NULL!	#NULL!	#NULL!	#NULL!	#NULL!	#NULL!	#NULL!	#NULL!	#NULL!	#NULL!		Yes	Very effective	Yes, the full cost is paid	1.1459
735	25-34	Bachelor_s degree or higher	White, Non-Hispanic	Female	$40,000 to $49,999	Married	Metro	Northeast	Working - as a paid employee	Yes	Yes, some years	Less than $30	No, no effect	Yes, more likely	Protect myself	No	Yes	No	No	No	No	No	No	No	No	No		Yes	Somewhat effective	Yes, the full cost is paid	1.0009
736	25-34	High school	White, Non-Hispanic	Male	$100,000 to $124,999	Married	Non-Metro	Midwest	Working - as a paid employee	Yes	Yes, some years	Less than $30	No, no effect	No, no effect	Protect myself and others	No	Yes	No	No	No	No	No	Yes	No	No	No		Yes	It varies from season to season	Don_t know	0.9836
737	65-74	Bachelor_s degree or higher	White, Non-Hispanic	Male	$85,000 to $99,999	Married	Metro	Northeast	Not working - retired	Yes	Yes, every year	$0	No, no effect	No, no effect	Protect myself	#NULL!	#NULL!	#NULL!	#NULL!	#NULL!	#NULL!	#NULL!	#NULL!	#NULL!	#NULL!	#NULL!		Yes	Somewhat effective	Yes, the full cost is paid	0.576
738	45-54	Some college	Black, Non-Hispanic	Male	$100,000 to $124,999	Married	Metro	Northeast	Working - as a paid employee	Yes	Yes, every year	Less than $30	Yes, more likely	Yes, more likely	Protect myself	#NULL!	#NULL!	#NULL!	#NULL!	#NULL!	#NULL!	#NULL!	#NULL!	#NULL!	#NULL!	#NULL!		Yes	Very effective	Yes, the full cost is paid	1.0595
739	55-64	Some college	White, Non-Hispanic	Male	$175,000 or more	Married	Metro	Northeast	Working - as a paid employee	Yes	Yes, some years	$0	No, no effect	No, no effect	Protect myself and others	No	Yes	No	No	No	No	No	Yes	No	No	No		Yes	Somewhat effective	Yes, the full cost is paid	0.7816
740	45-54	Some college	White, Non-Hispanic	Female	$85,000 to $99,999	Married	Metro	West	Working - as a paid employee	Yes	Yes, some years	$0	Yes, more likely	No, less likely	Protect myself	No	No	No	No	No	No	No	Yes	No	No	No		Yes	It varies from season to season	Yes, the full cost is paid	0.8093
741	65-74	High school	Hispanic	Male	$30,000 to $34,999	Married	Metro	South	Not working - retired	Yes	Yes, every year	$0	No, no effect	No, no effect	Protect myself and others	#NULL!	#NULL!	#NULL!	#NULL!	#NULL!	#NULL!	#NULL!	#NULL!	#NULL!	#NULL!	#NULL!		Yes	Somewhat effective	Yes, the full cost is paid	0.9297
742	65-74	Less than high school	White, Non-Hispanic	Male	$50,000 to $59,999	Married	Metro	South	Not working - retired	Yes	Yes, every year	$0	No, no effect	No, no effect	Protect myself	#NULL!	#NULL!	#NULL!	#NULL!	#NULL!	#NULL!	#NULL!	#NULL!	#NULL!	#NULL!	#NULL!		Yes	Very effective	Yes, the full cost is paid	0.9128
743	55-64	Some college	Black, Non-Hispanic	Male	$75,000 to $84,999	Married	Non-Metro	South	Not working - disabled	Yes	No, never	#NULL!	#NULL!	#NULL!	#NULL!	No	No	No	No	Yes	Yes	No	No	No	No	No		Yes	Somewhat effective	Yes, the full cost is paid	1.1105
744	65-74	High school	White, Non-Hispanic	Female	$100,000 to $124,999	Married	Metro	Northeast	Not working - retired	Yes	Yes, every year	$0	No, no effect	No, no effect	Protect myself and others	#NULL!	#NULL!	#NULL!	#NULL!	#NULL!	#NULL!	#NULL!	#NULL!	#NULL!	#NULL!	#NULL!		Yes	Somewhat effective	Yes, the full cost is paid	0.797
745	55-64	High school	White, Non-Hispanic	Female	$75,000 to $84,999	Married	Non-Metro	South	Working - as a paid employee	Yes	No, never	#NULL!	#NULL!	#NULL!	#NULL!	No	No	No	No	No	No	No	Yes	No	No	No		Yes	Very effective	Yes, the full cost is paid	0.8354
746	35-44	Bachelor_s degree or higher	Black, Non-Hispanic	Male	$75,000 to $84,999	Married	Non-Metro	South	Working - as a paid employee	Yes	Yes, every year	$0	No, no effect	No, no effect	Protect myself and others	#NULL!	#NULL!	#NULL!	#NULL!	#NULL!	#NULL!	#NULL!	#NULL!	#NULL!	#NULL!	#NULL!		Yes	Somewhat effective	Yes, the full cost is paid	1.1871
747	45-54	Bachelor_s degree or higher	Black, Non-Hispanic	Male	$40,000 to $49,999	Divorced	Metro	South	Working - as a paid employee	Yes	No, never	#NULL!	#NULL!	#NULL!	#NULL!	No	Yes	No	No	Yes	No	No	No	No	No	No		Yes	Not effective	Yes, the full cost is paid	0.8872
748	35-44	Bachelor_s degree or higher	White, Non-Hispanic	Male	$100,000 to $124,999	Living with partner	Metro	Northeast	Working - as a paid employee	Yes	No, never	#NULL!	#NULL!	#NULL!	#NULL!	No	Yes	No	No	Yes	No	Yes	No	No	No	No		Yes	Somewhat effective	Don_t know	0.8356
749	55-64	Bachelor_s degree or higher	White, Non-Hispanic	Female	$125,000 to $149,999	Married	Metro	South	Not working - retired	Yes	Yes, every year	Less than $30	No, no effect	Yes, more likely	Protect myself and others	#NULL!	#NULL!	#NULL!	#NULL!	#NULL!	#NULL!	#NULL!	#NULL!	#NULL!	#NULL!	#NULL!		Yes	Very effective	Yes, the full cost is paid	0.7416
750	45-54	Some college	White, Non-Hispanic	Female	$40,000 to $49,999	Married	Metro	South	Not working - other	Yes	Yes, every year	Less than $30	No, no effect	No, no effect	Protect myself and others	#NULL!	#NULL!	#NULL!	#NULL!	#NULL!	#NULL!	#NULL!	#NULL!	#NULL!	#NULL!	#NULL!		Yes	It varies from season to season	Yes, the full cost is paid	0.8203
751	18-24	Bachelor_s degree or higher	Black, Non-Hispanic	Female	$25,000 to $29,999	Living with partner	Metro	South	Not working - looking for work	Yes	No, never	#NULL!	#NULL!	#NULL!	#NULL!	No	No	Yes	No	Yes	No	No	No	No	No	No		Yes	It varies from season to season	Don_t know	1.4536
752	55-64	High school	White, Non-Hispanic	Male	$175,000 or more	Married	Metro	Northeast	Working - as a paid employee	Yes	Yes, every year	$0	No, no effect	No, no effect	Protect myself and others	#NULL!	#NULL!	#NULL!	#NULL!	#NULL!	#NULL!	#NULL!	#NULL!	#NULL!	#NULL!	#NULL!		Yes	Somewhat effective	Yes, the full cost is paid	0.8022
753	55-64	Bachelor_s degree or higher	White, Non-Hispanic	Female	$100,000 to $124,999	Married	Non-Metro	West	Working - as a paid employee	Yes	Yes, some years	$0	No, no effect	No, no effect	Protect myself and others	No	No	No	No	No	Yes	No	No	No	No	No		Yes	Somewhat effective	Yes, the full cost is paid	1.1635
754	45-54	Some college	White, Non-Hispanic	Female	$60,000 to $74,999	Married	Metro	South	Not working - other	Yes	No, never	#NULL!	#NULL!	#NULL!	#NULL!	No	Yes	No	No	No	No	No	No	No	Yes	No	they never have right one	Yes	It varies from season to season	Don_t know	0.7771
755	45-54	High school	White, Non-Hispanic	Male	$30,000 to $34,999	Never married	Metro	Northeast	Working - as a paid employee	No	No, never	#NULL!	#NULL!	#NULL!	#NULL!	No	No	No	No	No	No	Yes	No	No	No	No		Yes	Somewhat effective	Yes, the full cost is paid	1.0813
756	18-24	Some college	White, Non-Hispanic	Male	$60,000 to $74,999	Never married	Metro	Midwest	Working - as a paid employee	Yes	Yes, some years	Don_t know	Yes, more likely	Yes, more likely	Protect myself and others	No	No	No	No	No	No	Yes	No	No	No	No		Yes	Very effective	Yes, the full cost is paid	1.302
757	18-24	High school	White, Non-Hispanic	Male	$5,000 to $7,499	Never married	Metro	Midwest	Working - as a paid employee	Yes	Yes, some years	$0	No, no effect	No, no effect	Protect myself and others	No	Yes	No	No	No	Yes	Yes	No	No	Yes	No	When I get one, I end up getting sick	Yes	It varies from season to season	Yes, the full cost is paid	1.2423
758	25-34	Some college	White, Non-Hispanic	Female	$50,000 to $59,999	Living with partner	Metro	Midwest	Working - as a paid employee	Yes	No, never	#NULL!	#NULL!	#NULL!	#NULL!	No	Yes	No	No	Yes	No	Yes	No	No	Yes	No	There are too many toxic ingredients mixed in and it doesn_t make sense to inject yourself with unnecessary crap that doesn_t even guarantee that you won_t get the flu.	Yes	Not effective	Yes, the full cost is paid	1.2032
759	35-44	Some college	White, Non-Hispanic	Male	$100,000 to $124,999	Living with partner	Metro	South	Working - as a paid employee	Yes	No, never	#NULL!	#NULL!	#NULL!	#NULL!	No	No	No	Yes	No	No	No	No	No	No	No		Yes	Don_t know	Don_t know	1.0651
760	55-64	High school	White, Non-Hispanic	Female	$40,000 to $49,999	Widowed	Non-Metro	South	Not working - retired	Yes	Yes, every year	$0	No, no effect	No, no effect	Protect myself and others	#NULL!	#NULL!	#NULL!	#NULL!	#NULL!	#NULL!	#NULL!	#NULL!	#NULL!	#NULL!	#NULL!		Yes	Very effective	Yes, the full cost is paid	0.7767
761	55-64	High school	Black, Non-Hispanic	Male	$50,000 to $59,999	Married	Non-Metro	South	Working - as a paid employee	No	No, never	#NULL!	#NULL!	#NULL!	#NULL!	No	No	No	No	No	No	No	No	No	Yes	No	makes me sick	Yes	Somewhat effective	Yes, the full cost is paid	1.4553
762	18-24	Some college	White, Non-Hispanic	Female	$85,000 to $99,999	Never married	Metro	Midwest	Working - as a paid employee	Yes	Yes, every year	$0	No, no effect	No, no effect	Protect myself and others	#NULL!	#NULL!	#NULL!	#NULL!	#NULL!	#NULL!	#NULL!	#NULL!	#NULL!	#NULL!	#NULL!		Yes	Very effective	Yes, the full cost is paid	1.3661
763	45-54	Some college	2+ Races, Non-Hispanic	Female	$75,000 to $84,999	Divorced	Metro	Northeast	Working - as a paid employee	Yes	Yes, every year	$0	Yes, more likely	No, no effect	Protect myself and others	#NULL!	#NULL!	#NULL!	#NULL!	#NULL!	#NULL!	#NULL!	#NULL!	#NULL!	#NULL!	#NULL!		Yes	Somewhat effective	Don_t know	0.2919
764	35-44	Bachelor_s degree or higher	Other, Non-Hispanic	Male	$175,000 or more	Married	Non-Metro	Northeast	Working - as a paid employee	Yes	Yes, some years	$30 to $60	No, no effect	No, no effect	Protect myself	No	No	No	No	No	No	No	Yes	No	No	No		Yes	Somewhat effective	Yes, but only part of the cost is paid	1.2558
765	75+	Bachelor_s degree or higher	White, Non-Hispanic	Female	$50,000 to $59,999	Married	Metro	West	Not working - retired	Yes	Yes, every year	$0	No, no effect	No, no effect	Protect myself	#NULL!	#NULL!	#NULL!	#NULL!	#NULL!	#NULL!	#NULL!	#NULL!	#NULL!	#NULL!	#NULL!		Yes	Very effective	Yes, the full cost is paid	0.5651
766	55-64	Some college	White, Non-Hispanic	Male	$30,000 to $34,999	Never married	Metro	Midwest	Working - as a paid employee	Yes	Yes, some years	Less than $30	No, no effect	No, no effect	Protect myself	Yes	Yes	No	No	No	Yes	No	No	No	No	No		Yes	Don_t know	No	0.7752
767	65-74	Less than high school	Hispanic	Male	$15,000 to $19,999	Separated	Metro	South	Not working - retired	Yes	No, never	#NULL!	#NULL!	#NULL!	#NULL!	No	No	No	No	No	No	Yes	No	No	No	No		Yes	Somewhat effective	Don_t know	1.1259
768	55-64	Some college	White, Non-Hispanic	Female	$60,000 to $74,999	Married	Metro	Midwest	Not working - other	Yes	Yes, every year	$0	Yes, more likely	No, less likely	Protect myself and others	#NULL!	#NULL!	#NULL!	#NULL!	#NULL!	#NULL!	#NULL!	#NULL!	#NULL!	#NULL!	#NULL!		Yes	Somewhat effective	Yes, the full cost is paid	0.7736
769	35-44	Bachelor_s degree or higher	Hispanic	Male	$50,000 to $59,999	Married	Metro	South	Working - as a paid employee	Yes	Yes, some years	$0	Yes, more likely	No, no effect	Protect myself and others	Yes	No	No	No	No	No	No	Yes	No	No	No		Yes	Somewhat effective	Yes, the full cost is paid	1.0463
770	35-44	Less than high school	White, Non-Hispanic	Male	$50,000 to $59,999	Married	Non-Metro	Midwest	Working - as a paid employee	Yes	Yes, every year	Don_t know	Yes, more likely	No, no effect	Protect myself	#NULL!	#NULL!	#NULL!	#NULL!	#NULL!	#NULL!	#NULL!	#NULL!	#NULL!	#NULL!	#NULL!		Yes	Somewhat effective	No	1.1913
771	55-64	Bachelor_s degree or higher	Other, Non-Hispanic	Male	$75,000 to $84,999	Married	Metro	West	Not working - retired	Yes	No, never	#NULL!	#NULL!	#NULL!	#NULL!	No	No	No	No	No	No	No	No	No	Yes	No	no need	Yes	It varies from season to season	Don_t know	1.1093
772	55-64	Bachelor_s degree or higher	White, Non-Hispanic	Female	$100,000 to $124,999	Never married	Metro	South	Not working - retired	Yes	Yes, every year	$0	No, no effect	No, no effect	Protect myself and others	#NULL!	#NULL!	#NULL!	#NULL!	#NULL!	#NULL!	#NULL!	#NULL!	#NULL!	#NULL!	#NULL!		Yes	Somewhat effective	Yes, the full cost is paid	0.7416
773	65-74	Some college	White, Non-Hispanic	Female	$50,000 to $59,999	Married	Metro	South	Not working - retired	No	Yes, every year	$0	No, no effect	No, no effect	Protect myself and others	#NULL!	#NULL!	#NULL!	#NULL!	#NULL!	#NULL!	#NULL!	#NULL!	#NULL!	#NULL!	#NULL!		Yes	Very effective	Yes, the full cost is paid	1.0624
774	65-74	Some college	White, Non-Hispanic	Female	$10,000 to $12,499	Divorced	Metro	Northeast	Not working - retired	No	Yes, some years	$0	No, no effect	No, no effect	Protect myself and others	No	Yes	No	No	Yes	No	No	No	No	No	No		Yes	Somewhat effective	Yes, the full cost is paid	0.9219
775	35-44	High school	White, Non-Hispanic	Female	$40,000 to $49,999	Married	Non-Metro	South	Not working - other	Yes	Yes, every year	Less than $30	No, no effect	No, no effect	Protect myself and others	#NULL!	#NULL!	#NULL!	#NULL!	#NULL!	#NULL!	#NULL!	#NULL!	#NULL!	#NULL!	#NULL!		Yes	Somewhat effective	Don_t know	1.1012
776	55-64	Bachelor_s degree or higher	Black, Non-Hispanic	Male	$100,000 to $124,999	Married	Metro	Northeast	Working - as a paid employee	Yes	Yes, every year	$0	No, no effect	No, no effect	Protect myself	#NULL!	#NULL!	#NULL!	#NULL!	#NULL!	#NULL!	#NULL!	#NULL!	#NULL!	#NULL!	#NULL!		Yes	Very effective	Yes, the full cost is paid	0.8906
777	55-64	Bachelor_s degree or higher	White, Non-Hispanic	Male	$100,000 to $124,999	Married	Metro	South	Working - as a paid employee	Yes	Yes, every year	Less than $30	No, no effect	No, no effect	Protect myself and others	#NULL!	#NULL!	#NULL!	#NULL!	#NULL!	#NULL!	#NULL!	#NULL!	#NULL!	#NULL!	#NULL!		Yes	Very effective	Yes, but only part of the cost is paid	0.7039
778	45-54	Bachelor_s degree or higher	Other, Non-Hispanic	Female	$175,000 or more	Never married	Metro	South	Working - as a paid employee	No	Yes, every year	Less than $30	Yes, more likely	Yes, more likely	Protect myself and others	#NULL!	#NULL!	#NULL!	#NULL!	#NULL!	#NULL!	#NULL!	#NULL!	#NULL!	#NULL!	#NULL!		Yes	Somewhat effective	Yes, the full cost is paid	1.8469
779	25-34	Bachelor_s degree or higher	White, Non-Hispanic	Male	$50,000 to $59,999	Living with partner	Metro	Midwest	Working - as a paid employee	Yes	Yes, some years	Less than $30	No, no effect	No, no effect	Protect myself and others	No	No	No	No	No	No	No	Yes	No	No	No		Yes	Somewhat effective	Yes, the full cost is paid	1.0944
780	75+	High school	White, Non-Hispanic	Female	$100,000 to $124,999	Married	Metro	South	Not working - retired	Yes	Yes, every year	$0	No, no effect	No, no effect	Protect myself and others	#NULL!	#NULL!	#NULL!	#NULL!	#NULL!	#NULL!	#NULL!	#NULL!	#NULL!	#NULL!	#NULL!		Yes	Somewhat effective	Yes, the full cost is paid	0.8539
781	55-64	Bachelor_s degree or higher	White, Non-Hispanic	Male	$175,000 or more	Married	Metro	Northeast	Working - as a paid employee	Yes	Yes, every year	$0	No, no effect	No, no effect	Protect myself and others	#NULL!	#NULL!	#NULL!	#NULL!	#NULL!	#NULL!	#NULL!	#NULL!	#NULL!	#NULL!	#NULL!		Yes	Somewhat effective	Yes, the full cost is paid	0.657
782	35-44	Less than high school	Hispanic	Male	$85,000 to $99,999	Living with partner	Metro	West	Working - as a paid employee	Yes	Yes, every year	$0	Yes, more likely	No, no effect	Protect myself and others	#NULL!	#NULL!	#NULL!	#NULL!	#NULL!	#NULL!	#NULL!	#NULL!	#NULL!	#NULL!	#NULL!		Yes	Somewhat effective	Yes, the full cost is paid	1.8297
783	45-54	Bachelor_s degree or higher	White, Non-Hispanic	Male	$60,000 to $74,999	Never married	Metro	South	Working - as a paid employee	Yes	No, never	#NULL!	#NULL!	#NULL!	#NULL!	No	No	No	No	No	No	Yes	No	No	Yes	No	I let my immune system do its job.	Yes	Somewhat effective	Don_t know	0.62
784	55-64	Some college	2+ Races, Non-Hispanic	Male	$85,000 to $99,999	Married	Metro	South	Working - as a paid employee	Yes	Yes, some years	$0	Yes, more likely	No, no effect	Protect myself and others	No	No	Yes	No	No	No	No	Yes	No	No	No		Yes	Somewhat effective	Yes, the full cost is paid	0.2705
785	35-44	Some college	White, Non-Hispanic	Male	$60,000 to $74,999	Married	Non-Metro	Midwest	Working - as a paid employee	Yes	Yes, every year	$0	No, no effect	No, no effect	Protect myself and others	#NULL!	#NULL!	#NULL!	#NULL!	#NULL!	#NULL!	#NULL!	#NULL!	#NULL!	#NULL!	#NULL!		Yes	Somewhat effective	Yes, the full cost is paid	0.8441
786	65-74	Some college	White, Non-Hispanic	Female	$15,000 to $19,999	Widowed	Metro	West	Working - self-employed	No	No, never	#NULL!	#NULL!	#NULL!	#NULL!	No	No	No	No	No	No	No	No	No	Yes	No	i do not want	Yes	Don_t know	Don_t know	0.906
787	45-54	Bachelor_s degree or higher	White, Non-Hispanic	Female	$175,000 or more	Married	Metro	South	Working - as a paid employee	Yes	Yes, every year	$0	No, no effect	No, no effect	Protect myself and others	#NULL!	#NULL!	#NULL!	#NULL!	#NULL!	#NULL!	#NULL!	#NULL!	#NULL!	#NULL!	#NULL!		Yes	Somewhat effective	Yes, the full cost is paid	0.7416
788	55-64	Some college	White, Non-Hispanic	Male	$60,000 to $74,999	Married	Metro	West	Working - as a paid employee	Yes	Yes, every year	$0	Yes, more likely	No, less likely	Protect myself and others	#NULL!	#NULL!	#NULL!	#NULL!	#NULL!	#NULL!	#NULL!	#NULL!	#NULL!	#NULL!	#NULL!		Yes	Somewhat effective	Yes, the full cost is paid	0.6766
789	45-54	Bachelor_s degree or higher	Hispanic	Female	$75,000 to $84,999	Married	Metro	Northeast	Working - as a paid employee	Yes	Yes, some years	$0	No, no effect	No, no effect	Protect others	No	Yes	No	No	No	No	No	No	No	No	No		Yes	Not effective	Yes, the full cost is paid	0.9183
790	55-64	High school	White, Non-Hispanic	Female	$85,000 to $99,999	Married	Metro	Northeast	Working - as a paid employee	Yes	No, never	#NULL!	#NULL!	#NULL!	#NULL!	No	No	No	No	No	No	No	Yes	No	No	No		Yes	Somewhat effective	Yes, the full cost is paid	0.797
791	35-44	Some college	White, Non-Hispanic	Female	$5,000 to $7,499	Never married	Non-Metro	Midwest	Working - as a paid employee	No	Yes, some years	$0	No, no effect	No, no effect	Protect myself and others	No	No	No	No	No	No	No	No	No	Yes	No	never thought to get it	Yes	Don_t know	Don_t know	1.26
792	55-64	Bachelor_s degree or higher	White, Non-Hispanic	Female	$100,000 to $124,999	Married	Metro	Midwest	Working - as a paid employee	Yes	Yes, every year	$0	No, no effect	No, no effect	Protect myself and others	#NULL!	#NULL!	#NULL!	#NULL!	#NULL!	#NULL!	#NULL!	#NULL!	#NULL!	#NULL!	#NULL!		Yes	It varies from season to season	Yes, the full cost is paid	0.7383
793	35-44	Some college	White, Non-Hispanic	Female	$60,000 to $74,999	Married	Metro	South	Working - as a paid employee	Yes	Yes, every year	$0	No, no effect	No, no effect	Protect myself	#NULL!	#NULL!	#NULL!	#NULL!	#NULL!	#NULL!	#NULL!	#NULL!	#NULL!	#NULL!	#NULL!		Yes	Very effective	Yes, the full cost is paid	1.039
794	18-24	Bachelor_s degree or higher	Black, Non-Hispanic	Male	$125,000 to $149,999	Never married	Metro	South	Not working - other	Yes	Yes, every year	$0	No, no effect	No, no effect	Protect myself	#NULL!	#NULL!	#NULL!	#NULL!	#NULL!	#NULL!	#NULL!	#NULL!	#NULL!	#NULL!	#NULL!		Yes	It varies from season to season	Yes, the full cost is paid	1.6918
795	35-44	Bachelor_s degree or higher	White, Non-Hispanic	Male	$175,000 or more	Married	Metro	Midwest	Working - as a paid employee	Yes	Yes, every year	$0	No, no effect	No, no effect	Protect myself	#NULL!	#NULL!	#NULL!	#NULL!	#NULL!	#NULL!	#NULL!	#NULL!	#NULL!	#NULL!	#NULL!		Yes	Somewhat effective	Yes, the full cost is paid	0.8913
796	55-64	Bachelor_s degree or higher	White, Non-Hispanic	Male	$150,000 to $174,999	Married	Metro	West	Working - as a paid employee	Yes	Yes, some years	Less than $30	Yes, more likely	No, less likely	Protect myself	No	Yes	Yes	No	No	No	No	Yes	No	No	No		Yes	Somewhat effective	Yes, but only part of the cost is paid	0.5662
797	35-44	Bachelor_s degree or higher	White, Non-Hispanic	Male	$100,000 to $124,999	Married	Metro	Northeast	Working - as a paid employee	Yes	No, never	#NULL!	#NULL!	#NULL!	#NULL!	No	No	No	No	Yes	No	Yes	No	No	No	No		Yes	Somewhat effective	Yes, the full cost is paid	0.8356
798	55-64	Less than high school	White, Non-Hispanic	Female	$85,000 to $99,999	Married	Metro	Northeast	Not working - retired	No	Yes, every year	$0	No, no effect	Yes, more likely	Protect myself and others	#NULL!	#NULL!	#NULL!	#NULL!	#NULL!	#NULL!	#NULL!	#NULL!	#NULL!	#NULL!	#NULL!		Yes	Very effective	Yes, the full cost is paid	1.589
799	55-64	Some college	White, Non-Hispanic	Female	$50,000 to $59,999	Married	Non-Metro	West	Working - as a paid employee	Yes	Yes, every year	$0	No, no effect	No, no effect	Protect myself and others	#NULL!	#NULL!	#NULL!	#NULL!	#NULL!	#NULL!	#NULL!	#NULL!	#NULL!	#NULL!	#NULL!		Yes	It varies from season to season	Yes, the full cost is paid	1.1499
800	65-74	High school	White, Non-Hispanic	Female	$10,000 to $12,499	Divorced	Non-Metro	Northeast	Working - as a paid employee	Yes	No, never	#NULL!	#NULL!	#NULL!	#NULL!	No	No	No	No	No	No	No	No	No	Yes	No	just don_t	Yes	Somewhat effective	Yes, the full cost is paid	0.5709
801	75+	High school	White, Non-Hispanic	Male	$25,000 to $29,999	Married	Non-Metro	West	Not working - retired	Yes	Yes, every year	$0	Yes, more likely	Yes, more likely	Protect myself and others	#NULL!	#NULL!	#NULL!	#NULL!	#NULL!	#NULL!	#NULL!	#NULL!	#NULL!	#NULL!	#NULL!		Yes	It varies from season to season	Yes, the full cost is paid	1.0994
802	75+	Some college	Other, Non-Hispanic	Female	$60,000 to $74,999	Widowed	Metro	West	Not working - retired	Yes	No, never	#NULL!	#NULL!	#NULL!	#NULL!	No	No	Yes	No	No	No	No	No	No	Yes	No	Have not had influenza in the past.	Yes	Don_t know	Don_t know	1.1549
803	55-64	Some college	White, Non-Hispanic	Male	$100,000 to $124,999	Married	Metro	South	Working - as a paid employee	Yes	Yes, every year	$0	No, no effect	No, no effect	Protect myself and others	#NULL!	#NULL!	#NULL!	#NULL!	#NULL!	#NULL!	#NULL!	#NULL!	#NULL!	#NULL!	#NULL!		Yes	Somewhat effective	Yes, the full cost is paid	0.8375
804	45-54	Some college	White, Non-Hispanic	Female	$75,000 to $84,999	Married	Metro	South	Not working - retired	Yes	Yes, every year	Less than $30	Yes, more likely	Yes, more likely	Protect myself and others	#NULL!	#NULL!	#NULL!	#NULL!	#NULL!	#NULL!	#NULL!	#NULL!	#NULL!	#NULL!	#NULL!		Yes	Very effective	No	0.8822
805	55-64	Bachelor_s degree or higher	White, Non-Hispanic	Male	$150,000 to $174,999	Married	Metro	Midwest	Working - as a paid employee	Yes	Yes, every year	$0	No, less likely	No, less likely	Protect myself and others	#NULL!	#NULL!	#NULL!	#NULL!	#NULL!	#NULL!	#NULL!	#NULL!	#NULL!	#NULL!	#NULL!		Yes	Somewhat effective	Yes, the full cost is paid	0.6144
806	45-54	Bachelor_s degree or higher	White, Non-Hispanic	Male	$125,000 to $149,999	Married	Metro	South	Working - as a paid employee	Yes	Yes, every year	$0	No, no effect	No, no effect	Protect myself and others	#NULL!	#NULL!	#NULL!	#NULL!	#NULL!	#NULL!	#NULL!	#NULL!	#NULL!	#NULL!	#NULL!		Yes	It varies from season to season	Yes, the full cost is paid	0.7039
807	55-64	High school	White, Non-Hispanic	Male	$175,000 or more	Widowed	Metro	Northeast	Working - as a paid employee	Yes	No, never	#NULL!	#NULL!	#NULL!	#NULL!	No	No	Yes	No	Yes	No	No	No	No	Yes	No	mistrust	Yes	It varies from season to season	Yes, the full cost is paid	0.7034
808	45-54	Bachelor_s degree or higher	White, Non-Hispanic	Male	$100,000 to $124,999	Divorced	Metro	South	Working - as a paid employee	Yes	No, never	#NULL!	#NULL!	#NULL!	#NULL!	No	No	No	No	Yes	No	Yes	No	No	No	No		Yes	Not effective	Don_t know	0.7039
809	18-24	Less than high school	Hispanic	Female	Less than $5,000	Married	Metro	South	Not working - other	No	Yes, some years	$0	Yes, more likely	Yes, more likely	Protect myself and others	No	Yes	No	No	No	No	No	No	No	No	No		Yes	Very effective	Yes, the full cost is paid	2.5953
810	25-34	High school	2+ Races, Non-Hispanic	Female	$30,000 to $34,999	Never married	Non-Metro	South	Working - self-employed	Yes	No, never	#NULL!	#NULL!	#NULL!	#NULL!	Yes	No	No	Yes	Yes	No	Yes	No	No	No	No		No	Don_t know	#NULL!	0.3903
811	65-74	Bachelor_s degree or higher	White, Non-Hispanic	Male	$85,000 to $99,999	Widowed	Metro	South	Not working - retired	Yes	Yes, every year	$0	No, no effect	No, no effect	Protect myself and others	#NULL!	#NULL!	#NULL!	#NULL!	#NULL!	#NULL!	#NULL!	#NULL!	#NULL!	#NULL!	#NULL!		Yes	Somewhat effective	Yes, the full cost is paid	0.6172
812	55-64	Less than high school	White, Non-Hispanic	Female	$12,500 to $14,999	Widowed	Metro	South	Not working - disabled	No	No, never	#NULL!	#NULL!	#NULL!	#NULL!	No	No	No	No	Yes	No	Yes	Yes	Yes	No	No		Yes	It varies from season to season	Don_t know	1.394
813	55-64	Bachelor_s degree or higher	White, Non-Hispanic	Male	$150,000 to $174,999	Divorced	Metro	Midwest	Working - as a paid employee	Yes	Yes, every year	$0	No, no effect	No, no effect	Protect myself and others	#NULL!	#NULL!	#NULL!	#NULL!	#NULL!	#NULL!	#NULL!	#NULL!	#NULL!	#NULL!	#NULL!		Yes	It varies from season to season	Yes, the full cost is paid	0.6144
814	45-54	Some college	White, Non-Hispanic	Female	$100,000 to $124,999	Married	Metro	West	Working - as a paid employee	Yes	Yes, some years	$0	No, no effect	No, no effect	Protect myself and others	No	No	No	No	No	Yes	No	No	No	No	No		Yes	Somewhat effective	Yes, the full cost is paid	0.8093
815	65-74	Some college	Black, Non-Hispanic	Male	$100,000 to $124,999	Married	Metro	South	Not working - looking for work	Yes	Yes, every year	Less than $30	Yes, more likely	Yes, more likely	Protect myself and others	#NULL!	#NULL!	#NULL!	#NULL!	#NULL!	#NULL!	#NULL!	#NULL!	#NULL!	#NULL!	#NULL!		Yes	Somewhat effective	Yes, but only part of the cost is paid	0.9953
816	45-54	High school	White, Non-Hispanic	Female	$100,000 to $124,999	Married	Non-Metro	Midwest	Working - as a paid employee	Yes	Yes, every year	Don_t know	No, no effect	No, no effect	Protect myself	#NULL!	#NULL!	#NULL!	#NULL!	#NULL!	#NULL!	#NULL!	#NULL!	#NULL!	#NULL!	#NULL!		Yes	Very effective	Yes, the full cost is paid	0.8147
817	65-74	High school	White, Non-Hispanic	Male	$25,000 to $29,999	Married	Metro	Midwest	Not working - retired	No	No, never	#NULL!	#NULL!	#NULL!	#NULL!	No	No	No	No	Yes	No	No	No	No	No	No		Yes	It varies from season to season	Yes, but only part of the cost is paid	1.0113
818	65-74	Bachelor_s degree or higher	White, Non-Hispanic	Male	$50,000 to $59,999	Married	Metro	Midwest	Not working - retired	Yes	Yes, every year	$0	No, no effect	No, no effect	Protect myself	#NULL!	#NULL!	#NULL!	#NULL!	#NULL!	#NULL!	#NULL!	#NULL!	#NULL!	#NULL!	#NULL!		Yes	Very effective	Yes, the full cost is paid	0.5412
819	25-34	Some college	White, Non-Hispanic	Male	$20,000 to $24,999	Never married	Metro	South	Working - as a paid employee	No	Yes, some years	$0	No, no effect	No, no effect	Protect myself and others	No	Yes	No	No	Yes	No	Yes	No	No	Yes	No	not reliable	Yes	Not effective	Yes, the full cost is paid	1.7627
820	35-44	Bachelor_s degree or higher	White, Non-Hispanic	Male	$150,000 to $174,999	Married	Metro	South	Working - as a paid employee	Yes	No, never	#NULL!	#NULL!	#NULL!	#NULL!	No	Yes	Yes	No	No	No	Yes	No	No	No	No		Yes	Somewhat effective	Yes, but only part of the cost is paid	0.8953
821	35-44	Bachelor_s degree or higher	White, Non-Hispanic	Female	$175,000 or more	Married	Metro	Midwest	Working - as a paid employee	Yes	Yes, every year	$0	No, no effect	No, no effect	Protect myself	#NULL!	#NULL!	#NULL!	#NULL!	#NULL!	#NULL!	#NULL!	#NULL!	#NULL!	#NULL!	#NULL!		Yes	Very effective	Yes, the full cost is paid	0.9871
822	25-34	Bachelor_s degree or higher	Hispanic	Female	$75,000 to $84,999	Married	Metro	West	Working - as a paid employee	No	No, never	#NULL!	#NULL!	#NULL!	#NULL!	No	No	No	Yes	No	No	No	No	No	No	No		Yes	Somewhat effective	Yes, the full cost is paid	1.7496
823	25-34	Some college	White, Non-Hispanic	Male	$60,000 to $74,999	Married	Non-Metro	South	Working - as a paid employee	Yes	Yes, every year	$0	Yes, more likely	No, no effect	Protect myself and others	#NULL!	#NULL!	#NULL!	#NULL!	#NULL!	#NULL!	#NULL!	#NULL!	#NULL!	#NULL!	#NULL!		Yes	Not effective	Don_t know	1.2794
824	55-64	Bachelor_s degree or higher	White, Non-Hispanic	Female	$175,000 or more	Divorced	Metro	Northeast	Working - self-employed	Yes	Yes, every year	$0	No, no effect	No, no effect	Protect myself	#NULL!	#NULL!	#NULL!	#NULL!	#NULL!	#NULL!	#NULL!	#NULL!	#NULL!	#NULL!	#NULL!		Yes	Somewhat effective	Don_t know	0.6921
825	25-34	Bachelor_s degree or higher	White, Non-Hispanic	Female	$175,000 or more	Married	Metro	South	Working - as a paid employee	Yes	No, never	#NULL!	#NULL!	#NULL!	#NULL!	No	Yes	Yes	No	Yes	No	Yes	Yes	No	No	No		Yes	Somewhat effective	Yes, the full cost is paid	0.9915
826	35-44	Some college	Black, Non-Hispanic	Male	$85,000 to $99,999	Married	Metro	South	Working - as a paid employee	Yes	Yes, some years	$0	No, no effect	Yes, more likely	Protect myself and others	No	No	No	No	No	No	Yes	No	No	No	No		Yes	Very effective	Yes, the full cost is paid	1.4438
827	55-64	Bachelor_s degree or higher	White, Non-Hispanic	Male	$85,000 to $99,999	Married	Metro	South	Working - as a paid employee	Yes	Yes, every year	$0	No, no effect	No, no effect	Protect myself	#NULL!	#NULL!	#NULL!	#NULL!	#NULL!	#NULL!	#NULL!	#NULL!	#NULL!	#NULL!	#NULL!		Yes	Somewhat effective	Yes, the full cost is paid	0.7039
828	35-44	Some college	Black, Non-Hispanic	Male	$100,000 to $124,999	Married	Metro	Northeast	Working - as a paid employee	Yes	No, never	#NULL!	#NULL!	#NULL!	#NULL!	No	No	Yes	No	No	No	No	No	No	No	No		Yes	Don_t know	Refused	1.3475
829	25-34	High school	White, Non-Hispanic	Female	$10,000 to $12,499	Living with partner	Metro	South	Not working - looking for work	No	Yes, some years	$0	No, less likely	No, no effect	Protect myself and others	No	Yes	No	No	No	No	No	No	No	No	No		Yes	Not effective	Yes, the full cost is paid	1.6718
830	75+	Some college	White, Non-Hispanic	Female	$125,000 to $149,999	Married	Metro	South	Not working - retired	Yes	Yes, every year	$0	No, no effect	No, no effect	Protect myself and others	#NULL!	#NULL!	#NULL!	#NULL!	#NULL!	#NULL!	#NULL!	#NULL!	#NULL!	#NULL!	#NULL!		Yes	Very effective	Yes, the full cost is paid	0.832
831	55-64	Bachelor_s degree or higher	White, Non-Hispanic	Female	$175,000 or more	Married	Metro	Northeast	Working - as a paid employee	Yes	Yes, every year	$0	No, no effect	No, no effect	Protect myself	#NULL!	#NULL!	#NULL!	#NULL!	#NULL!	#NULL!	#NULL!	#NULL!	#NULL!	#NULL!	#NULL!		Yes	It varies from season to season	Yes, the full cost is paid	0.6921
832	25-34	Bachelor_s degree or higher	White, Non-Hispanic	Female	$60,000 to $74,999	Never married	Metro	South	Not working - other	Yes	Yes, every year	$0	Yes, more likely	Yes, more likely	Protect myself and others	#NULL!	#NULL!	#NULL!	#NULL!	#NULL!	#NULL!	#NULL!	#NULL!	#NULL!	#NULL!	#NULL!		Yes	Very effective	Yes, the full cost is paid	1.0159
833	55-64	Some college	White, Non-Hispanic	Male	$85,000 to $99,999	Married	Metro	West	Working - as a paid employee	Yes	Yes, every year	$0	No, no effect	No, no effect	Protect myself	#NULL!	#NULL!	#NULL!	#NULL!	#NULL!	#NULL!	#NULL!	#NULL!	#NULL!	#NULL!	#NULL!		Yes	Very effective	Yes, the full cost is paid	0.7682
834	45-54	Bachelor_s degree or higher	White, Non-Hispanic	Male	$100,000 to $124,999	Married	Non-Metro	Midwest	Working - as a paid employee	Yes	Yes, some years	Less than $30	Yes, more likely	No, no effect	Protect myself	No	No	Yes	No	No	No	Yes	Yes	No	No	No		Yes	Somewhat effective	Yes, but only part of the cost is paid	0.6334
835	55-64	Some college	White, Non-Hispanic	Female	$35,000 to $39,999	Never married	Metro	West	Not working - retired	No	Yes, some years	$0	No, no effect	No, no effect	Protect myself	No	No	No	No	No	No	No	Yes	No	No	No		Yes	Don_t know	Yes, the full cost is paid	1.0288
836	45-54	Bachelor_s degree or higher	White, Non-Hispanic	Male	$175,000 or more	Married	Metro	South	Working - as a paid employee	Yes	Yes, every year	$0	No, no effect	No, no effect	Protect myself and others	#NULL!	#NULL!	#NULL!	#NULL!	#NULL!	#NULL!	#NULL!	#NULL!	#NULL!	#NULL!	#NULL!		Yes	Very effective	Yes, the full cost is paid	0.7039
837	18-24	High school	Hispanic	Male	$85,000 to $99,999	Never married	Metro	West	Not working - other	Yes	Yes, every year	$0	Yes, more likely	No, less likely	Protect myself and others	#NULL!	#NULL!	#NULL!	#NULL!	#NULL!	#NULL!	#NULL!	#NULL!	#NULL!	#NULL!	#NULL!		Yes	Somewhat effective	Yes, the full cost is paid	1.8549
838	45-54	Bachelor_s degree or higher	Black, Non-Hispanic	Male	$75,000 to $84,999	Married	Metro	West	Working - as a paid employee	Yes	No, never	#NULL!	#NULL!	#NULL!	#NULL!	No	No	No	No	No	No	Yes	No	No	No	No		Yes	Somewhat effective	Yes, the full cost is paid	0.8753
839	55-64	High school	White, Non-Hispanic	Male	$100,000 to $124,999	Married	Metro	South	Working - as a paid employee	Yes	Yes, every year	Less than $30	Yes, more likely	Yes, more likely	Protect myself and others	#NULL!	#NULL!	#NULL!	#NULL!	#NULL!	#NULL!	#NULL!	#NULL!	#NULL!	#NULL!	#NULL!		Yes	Somewhat effective	Yes, the full cost is paid	0.7536
840	65-74	Bachelor_s degree or higher	White, Non-Hispanic	Male	$60,000 to $74,999	Married	Metro	South	Not working - retired	Yes	Yes, every year	$0	No, no effect	No, no effect	Protect myself and others	#NULL!	#NULL!	#NULL!	#NULL!	#NULL!	#NULL!	#NULL!	#NULL!	#NULL!	#NULL!	#NULL!		Yes	Very effective	Yes, the full cost is paid	0.5436
841	35-44	Bachelor_s degree or higher	Hispanic	Male	$75,000 to $84,999	Living with partner	Metro	South	Working - as a paid employee	Yes	Yes, every year	$0	Yes, more likely	No, no effect	Protect myself	#NULL!	#NULL!	#NULL!	#NULL!	#NULL!	#NULL!	#NULL!	#NULL!	#NULL!	#NULL!	#NULL!		Yes	Somewhat effective	Yes, the full cost is paid	1.1879
842	35-44	Bachelor_s degree or higher	Other, Non-Hispanic	Female	$60,000 to $74,999	Married	Non-Metro	South	Working - as a paid employee	Yes	Yes, every year	$0	Yes, more likely	No, no effect	Protect myself and others	#NULL!	#NULL!	#NULL!	#NULL!	#NULL!	#NULL!	#NULL!	#NULL!	#NULL!	#NULL!	#NULL!		Yes	Very effective	Yes, the full cost is paid	1.4677
843	45-54	Some college	White, Non-Hispanic	Female	$100,000 to $124,999	Married	Metro	South	Working - as a paid employee	Yes	No, never	#NULL!	#NULL!	#NULL!	#NULL!	No	No	No	No	No	No	No	No	No	Yes	No	Just never have gotten one	Yes	It varies from season to season	Yes, the full cost is paid	0.8822
844	75+	High school	White, Non-Hispanic	Male	$40,000 to $49,999	Married	Non-Metro	Midwest	Not working - retired	Yes	Yes, every year	$0	Yes, more likely	Yes, more likely	Protect myself and others	#NULL!	#NULL!	#NULL!	#NULL!	#NULL!	#NULL!	#NULL!	#NULL!	#NULL!	#NULL!	#NULL!		Yes	Very effective	Yes, but only part of the cost is paid	0.6305
845	65-74	Bachelor_s degree or higher	White, Non-Hispanic	Female	$175,000 or more	Married	Metro	South	Not working - retired	Yes	Yes, every year	$0	Yes, more likely	Yes, more likely	Protect myself and others	#NULL!	#NULL!	#NULL!	#NULL!	#NULL!	#NULL!	#NULL!	#NULL!	#NULL!	#NULL!	#NULL!		Yes	Somewhat effective	Yes, the full cost is paid	0.6994
846	55-64	Bachelor_s degree or higher	White, Non-Hispanic	Female	$150,000 to $174,999	Married	Metro	West	Working - as a paid employee	Yes	No, never	#NULL!	#NULL!	#NULL!	#NULL!	No	Yes	No	No	Yes	No	Yes	No	No	No	No		Yes	It varies from season to season	Yes, but only part of the cost is paid	0.6415
847	55-64	High school	White, Non-Hispanic	Male	Less than $5,000	Married	Metro	Midwest	Not working - looking for work	No	No, never	#NULL!	#NULL!	#NULL!	#NULL!	No	No	Yes	No	No	No	No	No	No	No	No		No	Don_t know	#NULL!	1.0158
848	35-44	High school	White, Non-Hispanic	Male	$125,000 to $149,999	Married	Metro	West	Working - as a paid employee	Yes	No, never	#NULL!	#NULL!	#NULL!	#NULL!	No	No	No	Yes	No	No	No	No	No	No	No		Yes	Don_t know	Don_t know	1.0028
849	75+	Bachelor_s degree or higher	White, Non-Hispanic	Male	$30,000 to $34,999	Divorced	Non-Metro	South	Not working - retired	No	Yes, every year	$0	Yes, more likely	Yes, more likely	Protect myself	#NULL!	#NULL!	#NULL!	#NULL!	#NULL!	#NULL!	#NULL!	#NULL!	#NULL!	#NULL!	#NULL!		Yes	Very effective	Yes, the full cost is paid	0.8138
850	45-54	Some college	White, Non-Hispanic	Male	$12,500 to $14,999	Divorced	Metro	Midwest	Not working - disabled	No	No, never	#NULL!	#NULL!	#NULL!	#NULL!	No	Yes	No	No	Yes	No	No	No	No	Yes	No	everyone i know who gets a shot usually gets sick!!!!	Yes	Not effective	Yes, the full cost is paid	0.9897
851	55-64	Some college	Black, Non-Hispanic	Female	$125,000 to $149,999	Married	Metro	Midwest	Not working - retired	Yes	No, never	#NULL!	#NULL!	#NULL!	#NULL!	No	No	No	No	No	Yes	No	No	No	No	No		Yes	It varies from season to season	Yes, the full cost is paid	1.1228
852	25-34	Bachelor_s degree or higher	White, Non-Hispanic	Male	$75,000 to $84,999	Married	Metro	Midwest	Working - as a paid employee	Yes	Yes, some years	$0	No, no effect	No, no effect	Protect myself and others	No	No	No	No	No	No	No	No	No	No	Yes		Yes	Somewhat effective	Yes, the full cost is paid	0.8913
853	65-74	High school	White, Non-Hispanic	Female	$60,000 to $74,999	Married	Non-Metro	Midwest	Not working - retired	Yes	Yes, every year	$0	No, no effect	No, no effect	Protect myself and others	#NULL!	#NULL!	#NULL!	#NULL!	#NULL!	#NULL!	#NULL!	#NULL!	#NULL!	#NULL!	#NULL!		Yes	Somewhat effective	Yes, the full cost is paid	0.6767
854	45-54	Some college	White, Non-Hispanic	Male	$40,000 to $49,999	Married	Metro	Northeast	Working - as a paid employee	Yes	Yes, every year	$0	No, no effect	No, no effect	Protect myself and others	#NULL!	#NULL!	#NULL!	#NULL!	#NULL!	#NULL!	#NULL!	#NULL!	#NULL!	#NULL!	#NULL!		Yes	Somewhat effective	Yes, the full cost is paid	0.7268
855	55-64	High school	White, Non-Hispanic	Female	$12,500 to $14,999	Divorced	Metro	Midwest	Not working - disabled	Yes	Yes, some years	Don_t know	Yes, more likely	No, less likely	Protect myself and others	Yes	No	No	No	No	No	No	No	No	No	No		Yes	Somewhat effective	No	0.6961
856	25-34	Some college	Black, Non-Hispanic	Female	$35,000 to $39,999	Never married	Metro	South	Working - as a paid employee	Yes	Yes, some years	$0	No, no effect	No, no effect	Protect myself	No	Yes	No	No	No	No	No	Yes	No	No	No		No	Somewhat effective	#NULL!	1.7294
857	75+	High school	White, Non-Hispanic	Male	$85,000 to $99,999	Married	Metro	Northeast	Not working - retired	Yes	Yes, every year	$0	No, no effect	No, no effect	Protect myself and others	#NULL!	#NULL!	#NULL!	#NULL!	#NULL!	#NULL!	#NULL!	#NULL!	#NULL!	#NULL!	#NULL!		Yes	Somewhat effective	Yes, the full cost is paid	0.7034
858	65-74	Bachelor_s degree or higher	White, Non-Hispanic	Male	$100,000 to $124,999	Never married	Metro	South	Not working - retired	Yes	Yes, every year	$0	No, no effect	No, no effect	Protect myself and others	#NULL!	#NULL!	#NULL!	#NULL!	#NULL!	#NULL!	#NULL!	#NULL!	#NULL!	#NULL!	#NULL!		Yes	It varies from season to season	Yes, the full cost is paid	0.6172
859	55-64	High school	White, Non-Hispanic	Male	$85,000 to $99,999	Married	Non-Metro	South	Working - as a paid employee	Yes	Yes, every year	$0	No, no effect	No, no effect	Protect myself	#NULL!	#NULL!	#NULL!	#NULL!	#NULL!	#NULL!	#NULL!	#NULL!	#NULL!	#NULL!	#NULL!		Yes	Somewhat effective	Yes, the full cost is paid	0.8408
860	65-74	High school	White, Non-Hispanic	Male	$40,000 to $49,999	Married	Non-Metro	Midwest	Not working - retired	Yes	No, never	#NULL!	#NULL!	#NULL!	#NULL!	No	No	No	No	No	No	No	Yes	No	No	No		Yes	It varies from season to season	Don_t know	0.6305
861	75+	Bachelor_s degree or higher	White, Non-Hispanic	Female	$85,000 to $99,999	Widowed	Metro	Midwest	Not working - retired	Yes	Yes, every year	$0	Yes, more likely	Yes, more likely	Protect myself	#NULL!	#NULL!	#NULL!	#NULL!	#NULL!	#NULL!	#NULL!	#NULL!	#NULL!	#NULL!	#NULL!		Yes	Somewhat effective	Yes, the full cost is paid	0.6962
862	45-54	Bachelor_s degree or higher	White, Non-Hispanic	Female	$85,000 to $99,999	Married	Metro	Midwest	Not working - other	Yes	Yes, some years	Less than $30	No, no effect	No, no effect	Protect myself	No	No	No	No	No	No	No	No	No	Yes	No	don_t like the idea of vaccines	Yes	Somewhat effective	Don_t know	0.7383
863	45-54	Bachelor_s degree or higher	White, Non-Hispanic	Male	$60,000 to $74,999	Married	Non-Metro	West	Working - as a paid employee	Yes	No, never	#NULL!	#NULL!	#NULL!	#NULL!	No	No	No	No	No	No	No	No	No	Yes	No	Human immune system is sufficient to recover from rare influenza infections	Yes	It varies from season to season	Yes, the full cost is paid	0.9728
864	35-44	Bachelor_s degree or higher	White, Non-Hispanic	Female	$100,000 to $124,999	Married	Metro	South	Working - as a paid employee	Yes	Yes, some years	Less than $30	Yes, more likely	No, less likely	Protect myself and others	No	No	No	No	No	No	No	Yes	No	No	No		Yes	It varies from season to season	Don_t know	0.9915
865	65-74	Bachelor_s degree or higher	White, Non-Hispanic	Female	$75,000 to $84,999	Widowed	Metro	South	Not working - retired	Yes	Yes, some years	$0	No, no effect	Yes, more likely	Protect myself and others	No	Yes	No	No	No	No	No	No	No	No	No		Yes	Somewhat effective	Yes, the full cost is paid	0.6994
866	65-74	High school	White, Non-Hispanic	Female	$40,000 to $49,999	Married	Metro	West	Working - as a paid employee	No	Yes, every year	$0	No, no effect	No, no effect	Protect myself and others	#NULL!	#NULL!	#NULL!	#NULL!	#NULL!	#NULL!	#NULL!	#NULL!	#NULL!	#NULL!	#NULL!		Yes	It varies from season to season	Yes, the full cost is paid	1.0559
867	65-74	Bachelor_s degree or higher	White, Non-Hispanic	Male	$40,000 to $49,999	Divorced	Metro	West	Working - self-employed	Yes	Yes, every year	$0	No, no effect	No, no effect	Protect myself and others	#NULL!	#NULL!	#NULL!	#NULL!	#NULL!	#NULL!	#NULL!	#NULL!	#NULL!	#NULL!	#NULL!		Yes	Somewhat effective	Yes, the full cost is paid	0.5264
868	55-64	Bachelor_s degree or higher	White, Non-Hispanic	Male	$75,000 to $84,999	Married	Metro	West	Working - as a paid employee	Yes	No, never	#NULL!	#NULL!	#NULL!	#NULL!	No	No	No	No	No	Yes	No	No	No	No	No		Yes	Somewhat effective	Yes, but only part of the cost is paid	0.6457
869	75+	High school	White, Non-Hispanic	Female	$125,000 to $149,999	Married	Metro	South	Not working - retired	Yes	No, never	#NULL!	#NULL!	#NULL!	#NULL!	No	No	Yes	No	No	No	No	No	No	No	No		Yes	Somewhat effective	Yes, the full cost is paid	0.8539
870	65-74	Bachelor_s degree or higher	White, Non-Hispanic	Female	$60,000 to $74,999	Never married	Metro	Northeast	Not working - retired	Yes	Yes, every year	$0	No, no effect	Yes, more likely	Protect myself and others	#NULL!	#NULL!	#NULL!	#NULL!	#NULL!	#NULL!	#NULL!	#NULL!	#NULL!	#NULL!	#NULL!		Yes	Somewhat effective	Yes, the full cost is paid	0.5749
871	45-54	Some college	Black, Non-Hispanic	Male	$100,000 to $124,999	Married	Metro	South	Working - as a paid employee	Yes	Yes, some years	$0	Yes, more likely	No, less likely	Protect myself and others	No	No	No	No	No	No	No	Yes	No	No	No		Yes	Somewhat effective	Yes, the full cost is paid	1.1352
872	65-74	High school	2+ Races, Non-Hispanic	Female	$100,000 to $124,999	Married	Metro	South	Not working - retired	Yes	Yes, every year	Less than $30	No, no effect	No, no effect	Protect myself and others	#NULL!	#NULL!	#NULL!	#NULL!	#NULL!	#NULL!	#NULL!	#NULL!	#NULL!	#NULL!	#NULL!		Yes	Very effective	Yes, the full cost is paid	0.3027
873	18-24	Some college	White, Non-Hispanic	Male	$100,000 to $124,999	Never married	Non-Metro	South	Not working - looking for work	Yes	Yes, every year	$0	No, no effect	No, no effect	Protect myself and others	#NULL!	#NULL!	#NULL!	#NULL!	#NULL!	#NULL!	#NULL!	#NULL!	#NULL!	#NULL!	#NULL!		Yes	Very effective	Yes, the full cost is paid	1.4526
874	45-54	Bachelor_s degree or higher	White, Non-Hispanic	Male	$50,000 to $59,999	Living with partner	Metro	West	Working - as a paid employee	Yes	Yes, some years	$0	No, no effect	No, no effect	Protect myself and others	Yes	Yes	No	No	No	No	No	Yes	No	No	No		Yes	Somewhat effective	Yes, the full cost is paid	0.5687
875	35-44	Bachelor_s degree or higher	White, Non-Hispanic	Female	$60,000 to $74,999	Divorced	Metro	South	Working - as a paid employee	No	No, never	#NULL!	#NULL!	#NULL!	#NULL!	No	Yes	No	No	No	No	No	No	No	No	No		Yes	It varies from season to season	Yes, the full cost is paid	1.2661
876	35-44	Some college	Hispanic	Female	$85,000 to $99,999	Married	Metro	West	Not working - other	Yes	Yes, every year	Less than $30	No, no effect	No, no effect	Protect myself and others	#NULL!	#NULL!	#NULL!	#NULL!	#NULL!	#NULL!	#NULL!	#NULL!	#NULL!	#NULL!	#NULL!		Yes	Very effective	Yes, the full cost is paid	1.4358
877	18-24	Bachelor_s degree or higher	Black, Non-Hispanic	Male	$20,000 to $24,999	Never married	Metro	South	Working - as a paid employee	Yes	No, never	#NULL!	#NULL!	#NULL!	#NULL!	No	No	Yes	No	No	No	No	Yes	No	No	No		Yes	Somewhat effective	Don_t know	1.3853
878	55-64	Some college	Other, Non-Hispanic	Male	$125,000 to $149,999	Never married	Metro	West	Working - as a paid employee	Yes	Yes, some years	$0	No, no effect	No, no effect	Protect myself and others	No	No	No	No	No	No	No	No	No	No	Yes		Yes	Don_t know	Don_t know	1.3198
879	25-34	Bachelor_s degree or higher	2+ Races, Non-Hispanic	Male	$100,000 to $124,999	Married	Metro	West	Working - as a paid employee	Yes	Yes, every year	$0	Yes, more likely	Yes, more likely	Protect myself and others	#NULL!	#NULL!	#NULL!	#NULL!	#NULL!	#NULL!	#NULL!	#NULL!	#NULL!	#NULL!	#NULL!		Yes	Somewhat effective	Yes, the full cost is paid	0.4058
880	25-34	High school	White, Non-Hispanic	Male	Less than $5,000	Never married	Metro	West	Not working - other	No	Yes, every year	$30 to $60	No, no effect	No, no effect	Protect myself and others	#NULL!	#NULL!	#NULL!	#NULL!	#NULL!	#NULL!	#NULL!	#NULL!	#NULL!	#NULL!	#NULL!		Yes	Very effective	Yes, the full cost is paid	1.1904
881	65-74	High school	White, Non-Hispanic	Female	$12,500 to $14,999	Married	Metro	West	Not working - retired	No	Yes, every year	$0	No, no effect	No, no effect	Protect myself and others	#NULL!	#NULL!	#NULL!	#NULL!	#NULL!	#NULL!	#NULL!	#NULL!	#NULL!	#NULL!	#NULL!		Yes	It varies from season to season	Yes, the full cost is paid	0.9299
882	18-24	Bachelor_s degree or higher	White, Non-Hispanic	Male	$85,000 to $99,999	Never married	Metro	Northeast	Not working - other	Yes	Yes, every year	$0	No, no effect	No, no effect	Protect myself and others	#NULL!	#NULL!	#NULL!	#NULL!	#NULL!	#NULL!	#NULL!	#NULL!	#NULL!	#NULL!	#NULL!		Yes	Very effective	Yes, the full cost is paid	1.1649
883	65-74	Bachelor_s degree or higher	White, Non-Hispanic	Male	$25,000 to $29,999	Widowed	Metro	South	Not working - retired	Yes	Yes, every year	$30 to $60	No, no effect	No, no effect	Protect myself	#NULL!	#NULL!	#NULL!	#NULL!	#NULL!	#NULL!	#NULL!	#NULL!	#NULL!	#NULL!	#NULL!		Yes	Somewhat effective	Yes, the full cost is paid	0.5738
884	35-44	Less than high school	White, Non-Hispanic	Male	$100,000 to $124,999	Living with partner	Non-Metro	Midwest	Working - as a paid employee	Yes	Yes, every year	$0	No, no effect	No, no effect	Protect myself and others	#NULL!	#NULL!	#NULL!	#NULL!	#NULL!	#NULL!	#NULL!	#NULL!	#NULL!	#NULL!	#NULL!		Yes	Somewhat effective	Yes, the full cost is paid	1.3526
885	25-34	Some college	Hispanic	Male	$30,000 to $34,999	Never married	Metro	West	Working - as a paid employee	Yes	Refused	#NULL!	#NULL!	#NULL!	#NULL!	#NULL!	#NULL!	#NULL!	#NULL!	#NULL!	#NULL!	#NULL!	#NULL!	#NULL!	#NULL!	#NULL!		Refused	Refused	#NULL!	1.6804
886	25-34	Some college	Hispanic	Female	$25,000 to $29,999	Married	Non-Metro	South	Not working - other	Yes	Yes, every year	$0	Yes, more likely	Yes, more likely	Protect myself and others	#NULL!	#NULL!	#NULL!	#NULL!	#NULL!	#NULL!	#NULL!	#NULL!	#NULL!	#NULL!	#NULL!		Yes	Somewhat effective	Yes, the full cost is paid	1.656
887	35-44	Bachelor_s degree or higher	White, Non-Hispanic	Male	$100,000 to $124,999	Married	Metro	West	Working - as a paid employee	Yes	Yes, every year	$0	No, no effect	No, no effect	Protect myself and others	#NULL!	#NULL!	#NULL!	#NULL!	#NULL!	#NULL!	#NULL!	#NULL!	#NULL!	#NULL!	#NULL!		Yes	Very effective	Yes, the full cost is paid	0.8212
888	55-64	Bachelor_s degree or higher	White, Non-Hispanic	Male	$75,000 to $84,999	Married	Non-Metro	South	Working - self-employed	Yes	Yes, some years	Less than $30	No, no effect	No, no effect	Protect myself and others	No	Yes	No	No	No	No	No	No	No	No	No		Yes	It varies from season to season	Yes, but only part of the cost is paid	0.6886
890	55-64	High school	White, Non-Hispanic	Male	$5,000 to $7,499	Never married	Non-Metro	Northeast	Not working - other	No	No, never	#NULL!	#NULL!	#NULL!	#NULL!	No	Yes	No	No	Yes	No	No	No	No	No	No		Yes	Don_t know	Yes, the full cost is paid	0.7304
891	75+	High school	White, Non-Hispanic	Male	$40,000 to $49,999	Married	Metro	West	Not working - retired	Yes	Yes, every year	$0	No, no effect	No, no effect	Protect myself and others	#NULL!	#NULL!	#NULL!	#NULL!	#NULL!	#NULL!	#NULL!	#NULL!	#NULL!	#NULL!	#NULL!		Yes	Very effective	Yes, the full cost is paid	0.6428
892	55-64	Bachelor_s degree or higher	Black, Non-Hispanic	Male	$100,000 to $124,999	Married	Metro	Midwest	Not working - retired	Yes	Yes, every year	$0	No, no effect	No, no effect	Protect myself and others	#NULL!	#NULL!	#NULL!	#NULL!	#NULL!	#NULL!	#NULL!	#NULL!	#NULL!	#NULL!	#NULL!		Yes	Very effective	Yes, the full cost is paid	0.8329
893	35-44	High school	White, Non-Hispanic	Male	$100,000 to $124,999	Married	Metro	Midwest	Working - as a paid employee	Yes	Yes, every year	$0	No, no effect	No, no effect	Protect myself	#NULL!	#NULL!	#NULL!	#NULL!	#NULL!	#NULL!	#NULL!	#NULL!	#NULL!	#NULL!	#NULL!		Yes	Very effective	Yes, the full cost is paid	1.0883
894	18-24	Bachelor_s degree or higher	Hispanic	Female	$50,000 to $59,999	Never married	Metro	West	Working - as a paid employee	Yes	Yes, every year	Less than $30	No, no effect	Yes, more likely	Protect myself	#NULL!	#NULL!	#NULL!	#NULL!	#NULL!	#NULL!	#NULL!	#NULL!	#NULL!	#NULL!	#NULL!		Yes	Very effective	Don_t know	1.2365
895	45-54	Bachelor_s degree or higher	White, Non-Hispanic	Female	$100,000 to $124,999	Married	Non-Metro	South	Working - as a paid employee	Yes	Yes, every year	Less than $30	No, no effect	Yes, more likely	Protect myself and others	#NULL!	#NULL!	#NULL!	#NULL!	#NULL!	#NULL!	#NULL!	#NULL!	#NULL!	#NULL!	#NULL!		Yes	Somewhat effective	Yes, but only part of the cost is paid	0.7254
896	45-54	Bachelor_s degree or higher	White, Non-Hispanic	Male	$100,000 to $124,999	Married	Metro	Midwest	Working - as a paid employee	Yes	Yes, some years	Less than $30	No, no effect	No, no effect	Protect myself and others	Yes	No	No	No	No	No	No	Yes	No	No	No		Yes	Somewhat effective	Yes, but only part of the cost is paid	0.7008
897	65-74	Some college	Hispanic	Male	$85,000 to $99,999	Married	Metro	West	Not working - retired	Yes	Yes, some years	$0	No, no effect	No, no effect	Protect myself and others	No	No	No	No	No	No	No	No	No	No	Yes		Yes	Very effective	Yes, the full cost is paid	0.8937
898	25-34	Bachelor_s degree or higher	Other, Non-Hispanic	Female	$50,000 to $59,999	Never married	Metro	South	Working - as a paid employee	Yes	No, never	#NULL!	#NULL!	#NULL!	#NULL!	No	No	No	No	No	No	No	Yes	No	No	No		Yes	Somewhat effective	Yes, the full cost is paid	1.5003
899	25-34	Some college	White, Non-Hispanic	Male	$10,000 to $12,499	Never married	Metro	West	Working - self-employed	Yes	No, never	#NULL!	#NULL!	#NULL!	#NULL!	Yes	Yes	No	No	No	No	No	Yes	No	No	No		Yes	It varies from season to season	Don_t know	0.8
900	65-74	High school	White, Non-Hispanic	Female	$15,000 to $19,999	Married	Metro	South	Not working - retired	Yes	Yes, every year	$0	Yes, more likely	No, no effect	Protect myself and others	#NULL!	#NULL!	#NULL!	#NULL!	#NULL!	#NULL!	#NULL!	#NULL!	#NULL!	#NULL!	#NULL!		Yes	Somewhat effective	Yes, the full cost is paid	0.6992
901	35-44	High school	Hispanic	Female	$30,000 to $34,999	Married	Metro	South	Not working - disabled	Yes	Yes, every year	$30 to $60	No, no effect	No, no effect	Protect myself and others	#NULL!	#NULL!	#NULL!	#NULL!	#NULL!	#NULL!	#NULL!	#NULL!	#NULL!	#NULL!	#NULL!		Yes	Very effective	Yes, but only part of the cost is paid	1.4936
902	65-74	Bachelor_s degree or higher	White, Non-Hispanic	Male	$150,000 to $174,999	Married	Metro	South	Working - self-employed	Yes	Yes, some years	$0	No, no effect	No, no effect	Protect myself and others	No	Yes	No	No	No	No	No	Yes	No	No	No		Yes	Somewhat effective	Don_t know	0.6172
903	75+	Bachelor_s degree or higher	White, Non-Hispanic	Male	$75,000 to $84,999	Married	Metro	West	Not working - retired	Yes	Yes, every year	Less than $30	No, no effect	No, no effect	Protect myself	#NULL!	#NULL!	#NULL!	#NULL!	#NULL!	#NULL!	#NULL!	#NULL!	#NULL!	#NULL!	#NULL!		Yes	Somewhat effective	Yes, the full cost is paid	0.5662
904	45-54	High school	White, Non-Hispanic	Female	$125,000 to $149,999	Married	Metro	West	Working - as a paid employee	Yes	Yes, every year	Less than $30	Yes, more likely	No, no effect	Protect myself and others	#NULL!	#NULL!	#NULL!	#NULL!	#NULL!	#NULL!	#NULL!	#NULL!	#NULL!	#NULL!	#NULL!		Yes	Somewhat effective	No	0.8306
905	65-74	High school	White, Non-Hispanic	Female	$60,000 to $74,999	Married	Metro	Northeast	Not working - retired	Yes	No, never	#NULL!	#NULL!	#NULL!	#NULL!	No	No	No	No	No	No	Yes	No	No	No	No		Yes	It varies from season to season	Yes, the full cost is paid	0.702
906	45-54	Bachelor_s degree or higher	White, Non-Hispanic	Male	$75,000 to $84,999	Married	Metro	West	Working - as a paid employee	Yes	Yes, every year	$0	No, no effect	No, no effect	Protect myself and others	#NULL!	#NULL!	#NULL!	#NULL!	#NULL!	#NULL!	#NULL!	#NULL!	#NULL!	#NULL!	#NULL!		Yes	Somewhat effective	Yes, the full cost is paid	0.6457
907	45-54	Some college	White, Non-Hispanic	Female	$35,000 to $39,999	Married	Non-Metro	South	Not working - other	No	Yes, every year	$30 to $60	No, no effect	No, no effect	Protect myself and others	#NULL!	#NULL!	#NULL!	#NULL!	#NULL!	#NULL!	#NULL!	#NULL!	#NULL!	#NULL!	#NULL!		Yes	It varies from season to season	Yes, but only part of the cost is paid	1.1634
908	55-64	Some college	Black, Non-Hispanic	Male	$60,000 to $74,999	Divorced	Metro	South	Not working - looking for work	Yes	Yes, some years	$0	No, less likely	No, no effect	Protect myself and others	No	No	No	No	No	No	No	Yes	No	No	No		No	Somewhat effective	#NULL!	0.8767
909	55-64	Bachelor_s degree or higher	White, Non-Hispanic	Male	$100,000 to $124,999	Married	Non-Metro	Northeast	Not working - retired	Yes	No, never	#NULL!	#NULL!	#NULL!	#NULL!	No	Yes	Yes	No	No	No	No	Yes	No	No	No		Yes	Somewhat effective	Don_t know	0.5039
910	25-34	Bachelor_s degree or higher	Black, Non-Hispanic	Female	$75,000 to $84,999	Married	Metro	West	Working - as a paid employee	Yes	No, never	#NULL!	#NULL!	#NULL!	#NULL!	No	Yes	No	No	Yes	No	No	No	No	No	No		Yes	Somewhat effective	Don_t know	1.4341
911	18-24	Some college	Hispanic	Female	$15,000 to $19,999	Married	Metro	West	Working - as a paid employee	Yes	No, never	#NULL!	#NULL!	#NULL!	#NULL!	Yes	No	No	No	No	No	No	Yes	No	No	No		No	Don_t know	#NULL!	1.3676
912	55-64	Some college	White, Non-Hispanic	Female	$100,000 to $124,999	Divorced	Metro	Northeast	Not working - retired	Yes	Yes, every year	$0	No, no effect	No, no effect	Protect myself and others	#NULL!	#NULL!	#NULL!	#NULL!	#NULL!	#NULL!	#NULL!	#NULL!	#NULL!	#NULL!	#NULL!		Yes	Somewhat effective	Yes, the full cost is paid	0.7766
913	55-64	Some college	White, Non-Hispanic	Female	$100,000 to $124,999	Married	Metro	West	Working - as a paid employee	Yes	Yes, every year	$0	No, no effect	No, no effect	Protect myself and others	#NULL!	#NULL!	#NULL!	#NULL!	#NULL!	#NULL!	#NULL!	#NULL!	#NULL!	#NULL!	#NULL!		Yes	It varies from season to season	Yes, the full cost is paid	0.8093
914	25-34	Bachelor_s degree or higher	White, Non-Hispanic	Male	Less than $5,000	Never married	Metro	West	Working - as a paid employee	Yes	Yes, some years	$0	No, no effect	No, no effect	Protect myself and others	No	Yes	No	No	Yes	No	Yes	No	No	Yes	No	makes your immune system fucked	Yes	Very effective	Yes, the full cost is paid	0.9375
916	55-64	Bachelor_s degree or higher	White, Non-Hispanic	Female	$100,000 to $124,999	Married	Metro	West	Not working - other	Yes	No, never	#NULL!	#NULL!	#NULL!	#NULL!	No	No	No	No	No	No	No	No	No	Yes	No	My father had guillain Barre from the flu vaccine many years ago and I_m concerned about a genetic component that may cause me to also contract the disease	Yes	Somewhat effective	Don_t know	0.6415
917	35-44	Some college	White, Non-Hispanic	Male	$12,500 to $14,999	Never married	Non-Metro	South	Not working - looking for work	Yes	No, never	#NULL!	#NULL!	#NULL!	#NULL!	No	No	No	No	No	Yes	No	No	No	No	No		No	Somewhat effective	#NULL!	0.8532
918	35-44	High school	Hispanic	Male	$60,000 to $74,999	Divorced	Metro	West	Working - as a paid employee	Yes	No, never	#NULL!	#NULL!	#NULL!	#NULL!	No	Yes	No	No	No	No	No	Yes	No	No	No		Yes	Somewhat effective	Yes, the full cost is paid	1.1719
919	45-54	High school	White, Non-Hispanic	Male	Less than $5,000	Never married	Non-Metro	Midwest	Not working - disabled	No	Yes, every year	$0	Yes, more likely	Yes, more likely	Protect myself	#NULL!	#NULL!	#NULL!	#NULL!	#NULL!	#NULL!	#NULL!	#NULL!	#NULL!	#NULL!	#NULL!		Yes	Very effective	Yes, the full cost is paid	0.9181
920	25-34	Bachelor_s degree or higher	Other, Non-Hispanic	Female	$85,000 to $99,999	Married	Metro	West	Working - as a paid employee	Yes	Yes, every year	$0	No, less likely	Yes, more likely	Protect myself and others	#NULL!	#NULL!	#NULL!	#NULL!	#NULL!	#NULL!	#NULL!	#NULL!	#NULL!	#NULL!	#NULL!		Yes	Somewhat effective	Yes, but only part of the cost is paid	1.5626
921	65-74	High school	White, Non-Hispanic	Female	$35,000 to $39,999	Widowed	Metro	Midwest	Not working - retired	No	No, never	#NULL!	#NULL!	#NULL!	#NULL!	No	No	Yes	No	No	No	No	No	No	No	No		Yes	Somewhat effective	Don_t know	1.1459
922	55-64	High school	White, Non-Hispanic	Male	$85,000 to $99,999	Divorced	Metro	Midwest	Not working - retired	Yes	Yes, every year	$0	No, no effect	No, no effect	Protect myself and others	#NULL!	#NULL!	#NULL!	#NULL!	#NULL!	#NULL!	#NULL!	#NULL!	#NULL!	#NULL!	#NULL!		Yes	Somewhat effective	Yes, the full cost is paid	0.7502
923	25-34	Bachelor_s degree or higher	Hispanic	Female	$85,000 to $99,999	Married	Metro	West	Working - as a paid employee	Yes	Yes, some years	Less than $30	No, no effect	Yes, more likely	Protect myself and others	No	Yes	Yes	No	No	No	Yes	Yes	No	No	No		Yes	It varies from season to season	Yes, the full cost is paid	1.2068
924	45-54	Bachelor_s degree or higher	White, Non-Hispanic	Male	$100,000 to $124,999	Married	Metro	South	Working - as a paid employee	Yes	Yes, every year	$0	Yes, more likely	Yes, more likely	Protect myself and others	#NULL!	#NULL!	#NULL!	#NULL!	#NULL!	#NULL!	#NULL!	#NULL!	#NULL!	#NULL!	#NULL!		Yes	Very effective	Yes, the full cost is paid	0.7039
925	45-54	Some college	Hispanic	Female	Less than $5,000	Divorced	Metro	West	Not working - looking for work	Yes	No, never	#NULL!	#NULL!	#NULL!	#NULL!	No	No	No	Yes	No	No	No	No	No	No	No		Yes	Don_t know	Don_t know	0.8793
926	35-44	Bachelor_s degree or higher	Black, Non-Hispanic	Female	$15,000 to $19,999	Never married	Metro	South	Working - as a paid employee	Yes	Yes, every year	$0	No, no effect	No, no effect	Protect myself and others	#NULL!	#NULL!	#NULL!	#NULL!	#NULL!	#NULL!	#NULL!	#NULL!	#NULL!	#NULL!	#NULL!		Yes	Very effective	Yes, the full cost is paid	1.1005
927	65-74	Bachelor_s degree or higher	White, Non-Hispanic	Male	$75,000 to $84,999	Married	Metro	West	Not working - retired	Yes	Yes, every year	$0	No, no effect	No, no effect	Protect myself and others	#NULL!	#NULL!	#NULL!	#NULL!	#NULL!	#NULL!	#NULL!	#NULL!	#NULL!	#NULL!	#NULL!		Yes	Somewhat effective	Yes, the full cost is paid	0.5662
928	25-34	Bachelor_s degree or higher	Other, Non-Hispanic	Male	$85,000 to $99,999	Married	Metro	Northeast	Working - self-employed	Yes	No, never	#NULL!	#NULL!	#NULL!	#NULL!	No	No	No	Yes	No	No	No	Yes	No	No	No		Yes	Somewhat effective	Don_t know	2.0012
929	35-44	Less than high school	Black, Non-Hispanic	Male	Less than $5,000	Never married	Metro	West	Not working - other	No	No, never	#NULL!	#NULL!	#NULL!	#NULL!	Yes	No	No	No	No	No	No	No	No	No	No		No	Not effective	#NULL!	2.219
930	55-64	Bachelor_s degree or higher	White, Non-Hispanic	Male	$175,000 or more	Living with partner	Metro	West	Working - as a paid employee	Yes	Yes, every year	$0	No, no effect	No, no effect	Protect myself and others	#NULL!	#NULL!	#NULL!	#NULL!	#NULL!	#NULL!	#NULL!	#NULL!	#NULL!	#NULL!	#NULL!		Yes	Somewhat effective	Yes, the full cost is paid	0.5662
931	18-24	High school	Other, Non-Hispanic	Male	Less than $5,000	Never married	Metro	West	Not working - other	Yes	No, never	#NULL!	#NULL!	#NULL!	#NULL!	No	No	Yes	No	No	No	Yes	Yes	No	No	No		Yes	Somewhat effective	Don_t know	1.9665
932	65-74	High school	White, Non-Hispanic	Female	$100,000 to $124,999	Married	Metro	Northeast	Not working - retired	Yes	Yes, every year	$0	No, no effect	No, no effect	Protect myself	#NULL!	#NULL!	#NULL!	#NULL!	#NULL!	#NULL!	#NULL!	#NULL!	#NULL!	#NULL!	#NULL!		Yes	Somewhat effective	Yes, the full cost is paid	0.797
933	65-74	Some college	White, Non-Hispanic	Female	$100,000 to $124,999	Married	Non-Metro	West	Working - as a paid employee	Yes	Yes, some years	$0	No, no effect	No, no effect	Protect myself	No	No	Yes	No	No	No	Yes	Yes	No	No	No		Yes	Somewhat effective	Yes, the full cost is paid	1.3055
934	75+	Bachelor_s degree or higher	White, Non-Hispanic	Male	$100,000 to $124,999	Married	Metro	West	Not working - retired	Yes	Yes, every year	$0	No, no effect	No, no effect	Protect myself and others	#NULL!	#NULL!	#NULL!	#NULL!	#NULL!	#NULL!	#NULL!	#NULL!	#NULL!	#NULL!	#NULL!		Yes	Somewhat effective	Yes, the full cost is paid	0.5662
935	18-24	High school	White, Non-Hispanic	Female	$150,000 to $174,999	Never married	Metro	West	Working - as a paid employee	Yes	No, never	#NULL!	#NULL!	#NULL!	#NULL!	No	Yes	Yes	No	No	No	Yes	No	No	Yes	No	I have bad reactions to shots	Yes	Somewhat effective	Don_t know	1.2919
936	35-44	Less than high school	White, Non-Hispanic	Male	$175,000 or more	Married	Metro	South	Working - as a paid employee	Yes	Yes, some years	$0	No, no effect	No, no effect	Protect myself and others	No	No	No	No	No	No	No	Yes	No	No	No		Yes	Somewhat effective	Yes, the full cost is paid	1.5033
937	18-24	Bachelor_s degree or higher	Hispanic	Female	$100,000 to $124,999	Never married	Metro	West	Working - as a paid employee	Yes	No, never	#NULL!	#NULL!	#NULL!	#NULL!	No	No	No	No	Yes	No	No	No	No	No	No		Yes	Somewhat effective	Yes, the full cost is paid	1.4038
938	45-54	Bachelor_s degree or higher	White, Non-Hispanic	Male	$125,000 to $149,999	Married	Metro	West	Working - as a paid employee	Yes	Yes, every year	$0	No, no effect	Yes, more likely	Protect myself and others	#NULL!	#NULL!	#NULL!	#NULL!	#NULL!	#NULL!	#NULL!	#NULL!	#NULL!	#NULL!	#NULL!		Yes	Somewhat effective	Yes, the full cost is paid	0.6457
939	55-64	High school	White, Non-Hispanic	Female	Less than $5,000	Never married	Metro	West	Not working - disabled	No	No, never	#NULL!	#NULL!	#NULL!	#NULL!	No	No	No	No	No	No	No	No	No	Yes	No	didnt knowthere was a vaccine	Yes	Don_t know	Don_t know	0.986
940	45-54	High school	Hispanic	Female	$40,000 to $49,999	Never married	Metro	West	Working - as a paid employee	No	No, never	#NULL!	#NULL!	#NULL!	#NULL!	Yes	Yes	No	No	No	No	No	No	No	No	No		No	Somewhat effective	#NULL!	1.4855
941	25-34	High school	White, Non-Hispanic	Male	$25,000 to $29,999	Living with partner	Non-Metro	Midwest	Not working - other	Yes	No, never	#NULL!	#NULL!	#NULL!	#NULL!	Yes	No	No	No	No	No	No	No	No	No	No		No	Somewhat effective	#NULL!	0.9145
942	45-54	Some college	White, Non-Hispanic	Male	$50,000 to $59,999	Never married	Metro	South	Not working - disabled	Yes	Yes, some years	$0	No, no effect	No, no effect	Protect myself and others	No	No	No	No	No	No	No	Yes	No	No	No		No	Somewhat effective	#NULL!	0.7376
943	45-54	Some college	White, Non-Hispanic	Male	$125,000 to $149,999	Married	Metro	Midwest	Working - as a paid employee	Yes	No, never	#NULL!	#NULL!	#NULL!	#NULL!	No	No	No	No	No	No	No	No	No	Yes	No	Always get sick when I get the shot	Yes	Not effective	Yes, the full cost is paid	0.8337
944	35-44	Bachelor_s degree or higher	Other, Non-Hispanic	Male	$175,000 or more	Married	Metro	South	Working - as a paid employee	Yes	Yes, every year	$0	Yes, more likely	No, no effect	Protect myself and others	#NULL!	#NULL!	#NULL!	#NULL!	#NULL!	#NULL!	#NULL!	#NULL!	#NULL!	#NULL!	#NULL!		Yes	Somewhat effective	Yes, the full cost is paid	1.538
945	65-74	Less than high school	White, Non-Hispanic	Female	$25,000 to $29,999	Widowed	Non-Metro	Midwest	Working - as a paid employee	Yes	No, never	#NULL!	#NULL!	#NULL!	#NULL!	No	Yes	No	No	No	No	No	No	No	No	No		Yes	Somewhat effective	Don_t know	0.9824
946	65-74	Less than high school	Black, Non-Hispanic	Female	$5,000 to $7,499	Divorced	Metro	South	Not working - retired	No	No, never	#NULL!	#NULL!	#NULL!	#NULL!	No	No	No	No	No	No	Yes	No	No	No	No		Yes	Don_t know	Don_t know	1.8896
947	45-54	Some college	Other, Non-Hispanic	Male	$100,000 to $124,999	Living with partner	Metro	West	Working - as a paid employee	Yes	Yes, every year	$0	Yes, more likely	No, no effect	Protect myself and others	#NULL!	#NULL!	#NULL!	#NULL!	#NULL!	#NULL!	#NULL!	#NULL!	#NULL!	#NULL!	#NULL!		Yes	Somewhat effective	Yes, the full cost is paid	1.3198
948	18-24	Bachelor_s degree or higher	White, Non-Hispanic	Female	$175,000 or more	Never married	Metro	Northeast	Not working - looking for work	Yes	Yes, some years	Don_t know	No, no effect	No, no effect	Protect myself	No	No	No	No	No	No	No	No	No	Yes	No	I_m not in a priority category	Yes	Somewhat effective	Don_t know	1.0765
949	55-64	High school	White, Non-Hispanic	Female	$75,000 to $84,999	Married	Metro	Midwest	Working - as a paid employee	Yes	No, never	#NULL!	#NULL!	#NULL!	#NULL!	No	No	No	No	No	No	No	No	No	No	Yes		Yes	Somewhat effective	Don_t know	0.9014
950	45-54	High school	White, Non-Hispanic	Male	$85,000 to $99,999	Living with partner	Metro	Northeast	Working - as a paid employee	Yes	No, never	#NULL!	#NULL!	#NULL!	#NULL!	No	No	Yes	No	No	No	No	No	No	No	No		Yes	Somewhat effective	Yes, but only part of the cost is paid	0.8022
951	65-74	High school	White, Non-Hispanic	Male	$25,000 to $29,999	Married	Metro	Midwest	Not working - retired	Yes	Yes, some years	$0	No, less likely	No, less likely	Protect myself	No	No	No	No	Yes	No	No	No	No	No	No		Yes	Somewhat effective	Yes, the full cost is paid	0.6976
952	55-64	High school	White, Non-Hispanic	Male	$100,000 to $124,999	Divorced	Metro	South	Working - as a paid employee	Yes	Yes, every year	$30 to $60	No, no effect	No, no effect	Protect myself	#NULL!	#NULL!	#NULL!	#NULL!	#NULL!	#NULL!	#NULL!	#NULL!	#NULL!	#NULL!	#NULL!		Yes	Very effective	No	0.8595
953	45-54	High school	Black, Non-Hispanic	Female	$50,000 to $59,999	Never married	Metro	South	Working - as a paid employee	No	Yes, every year	$0	No, no effect	No, no effect	Protect myself	#NULL!	#NULL!	#NULL!	#NULL!	#NULL!	#NULL!	#NULL!	#NULL!	#NULL!	#NULL!	#NULL!		Yes	Somewhat effective	Yes, the full cost is paid	1.5673
954	55-64	Less than high school	White, Non-Hispanic	Female	$50,000 to $59,999	Married	Metro	Northeast	Not working - disabled	Yes	Yes, every year	$0	No, no effect	No, no effect	Protect myself and others	#NULL!	#NULL!	#NULL!	#NULL!	#NULL!	#NULL!	#NULL!	#NULL!	#NULL!	#NULL!	#NULL!		Yes	Somewhat effective	Yes, the full cost is paid	1.0236
955	55-64	Some college	White, Non-Hispanic	Female	$75,000 to $84,999	Divorced	Metro	Northeast	Working - as a paid employee	No	No, never	#NULL!	#NULL!	#NULL!	#NULL!	No	No	No	No	No	No	Yes	No	No	No	No		Yes	Don_t know	Don_t know	1.1258
956	35-44	Some college	White, Non-Hispanic	Male	$85,000 to $99,999	Married	Metro	West	Working - as a paid employee	Yes	Yes, every year	Less than $30	Yes, more likely	No, no effect	Protect myself and others	#NULL!	#NULL!	#NULL!	#NULL!	#NULL!	#NULL!	#NULL!	#NULL!	#NULL!	#NULL!	#NULL!		Yes	Somewhat effective	Yes, the full cost is paid	0.977
957	55-64	High school	White, Non-Hispanic	Female	$75,000 to $84,999	Married	Metro	Northeast	Working - as a paid employee	Yes	Yes, every year	Don_t know	No, no effect	No, no effect	Protect myself and others	#NULL!	#NULL!	#NULL!	#NULL!	#NULL!	#NULL!	#NULL!	#NULL!	#NULL!	#NULL!	#NULL!		Yes	It varies from season to season	Yes, the full cost is paid	0.797
958	55-64	Less than high school	Hispanic	Male	$10,000 to $12,499	Married	Non-Metro	South	Not working - disabled	No	Yes, every year	Less than $30	No, no effect	Yes, more likely	Protect myself and others	#NULL!	#NULL!	#NULL!	#NULL!	#NULL!	#NULL!	#NULL!	#NULL!	#NULL!	#NULL!	#NULL!		Yes	It varies from season to season	Yes, the full cost is paid	1.5968
959	55-64	Some college	Black, Non-Hispanic	Female	$85,000 to $99,999	Divorced	Metro	South	Not working - retired	No	Yes, every year	$0	No, no effect	No, no effect	Protect myself	#NULL!	#NULL!	#NULL!	#NULL!	#NULL!	#NULL!	#NULL!	#NULL!	#NULL!	#NULL!	#NULL!		Yes	Somewhat effective	Yes, the full cost is paid	1.6351
960	55-64	Less than high school	White, Non-Hispanic	Female	$60,000 to $74,999	Married	Metro	South	Not working - retired	Yes	No, never	#NULL!	#NULL!	#NULL!	#NULL!	No	Yes	No	No	No	No	No	No	No	Yes	No	I am on Enbrel	Yes	Not effective	Yes, the full cost is paid	1.0343
962	55-64	High school	White, Non-Hispanic	Male	$60,000 to $74,999	Married	Metro	Midwest	Working - as a paid employee	Yes	No, never	#NULL!	#NULL!	#NULL!	#NULL!	No	Yes	No	No	No	No	No	No	No	No	No		Yes	Not effective	Don_t know	0.6608
963	65-74	High school	White, Non-Hispanic	Male	$30,000 to $34,999	Married	Metro	South	Not working - retired	Yes	Yes, every year	$0	No, no effect	No, no effect	Protect myself and others	#NULL!	#NULL!	#NULL!	#NULL!	#NULL!	#NULL!	#NULL!	#NULL!	#NULL!	#NULL!	#NULL!		Yes	Somewhat effective	Yes, the full cost is paid	0.7007
964	75+	High school	White, Non-Hispanic	Male	$60,000 to $74,999	Married	Metro	Northeast	Not working - retired	Yes	Yes, every year	$0	Yes, more likely	No, no effect	Protect myself and others	#NULL!	#NULL!	#NULL!	#NULL!	#NULL!	#NULL!	#NULL!	#NULL!	#NULL!	#NULL!	#NULL!		Yes	Somewhat effective	Yes, the full cost is paid	0.6195
965	55-64	Bachelor_s degree or higher	White, Non-Hispanic	Male	$125,000 to $149,999	Married	Metro	South	Working - as a paid employee	Yes	Yes, some years	$0	Yes, more likely	No, less likely	Protect myself	Yes	Yes	Yes	No	No	No	No	Yes	No	No	No		Yes	Somewhat effective	Yes, the full cost is paid	0.7039
966	55-64	High school	White, Non-Hispanic	Male	$20,000 to $24,999	Never married	Metro	South	Not working - retired	Yes	Yes, every year	$0	Yes, more likely	Yes, more likely	Protect myself and others	#NULL!	#NULL!	#NULL!	#NULL!	#NULL!	#NULL!	#NULL!	#NULL!	#NULL!	#NULL!	#NULL!		Yes	Somewhat effective	Yes, the full cost is paid	0.7038
967	65-74	Bachelor_s degree or higher	Other, Non-Hispanic	Male	$30,000 to $34,999	Married	Metro	Midwest	Working - as a paid employee	No	Yes, every year	Don_t know	No, no effect	No, no effect	Protect myself and others	#NULL!	#NULL!	#NULL!	#NULL!	#NULL!	#NULL!	#NULL!	#NULL!	#NULL!	#NULL!	#NULL!		Yes	Don_t know	Yes, but only part of the cost is paid	1.4229
968	55-64	Bachelor_s degree or higher	2+ Races, Non-Hispanic	Male	$60,000 to $74,999	Married	Metro	South	Working - as a paid employee	Yes	No, never	#NULL!	#NULL!	#NULL!	#NULL!	No	Yes	No	No	Yes	Yes	Yes	No	No	No	No		Yes	Not effective	Yes, the full cost is paid	0.2705
969	35-44	Some college	Black, Non-Hispanic	Female	$20,000 to $24,999	Never married	Metro	Northeast	Working - as a paid employee	Yes	Yes, some years	$30 to $60	Yes, more likely	Yes, more likely	Protect myself	No	Yes	No	No	No	No	No	No	No	No	No		Yes	Very effective	Yes, the full cost is paid	1.222
970	65-74	Less than high school	Hispanic	Male	$7,500 to $9,999	Widowed	Non-Metro	South	Not working - retired	No	No, never	#NULL!	#NULL!	#NULL!	#NULL!	No	No	No	No	No	No	No	Yes	No	No	No		Yes	Don_t know	Don_t know	1.5968
971	55-64	High school	Black, Non-Hispanic	Female	$25,000 to $29,999	Separated	Metro	Northeast	Working - as a paid employee	No	Yes, every year	$0	Yes, more likely	Yes, more likely	Protect myself and others	#NULL!	#NULL!	#NULL!	#NULL!	#NULL!	#NULL!	#NULL!	#NULL!	#NULL!	#NULL!	#NULL!		Yes	Somewhat effective	Yes, the full cost is paid	1.4563
972	65-74	Less than high school	Hispanic	Female	$85,000 to $99,999	Married	Metro	South	Not working - retired	Yes	Yes, every year	$0	No, no effect	No, no effect	Protect myself and others	#NULL!	#NULL!	#NULL!	#NULL!	#NULL!	#NULL!	#NULL!	#NULL!	#NULL!	#NULL!	#NULL!		Yes	Very effective	Yes, the full cost is paid	1.5581
973	65-74	Bachelor_s degree or higher	White, Non-Hispanic	Male	$175,000 or more	Married	Metro	Northeast	Working - as a paid employee	Yes	Yes, some years	$0	No, no effect	No, no effect	Protect myself	No	No	No	No	No	No	No	Yes	No	No	No		Yes	Somewhat effective	Yes, the full cost is paid	0.576
974	55-64	Some college	White, Non-Hispanic	Female	$20,000 to $24,999	Married	Metro	South	Working - as a paid employee	Yes	Yes, some years	$0	No, no effect	No, no effect	Protect myself	No	Yes	No	No	No	No	No	No	No	No	No		Yes	It varies from season to season	Yes, the full cost is paid	0.7224
975	65-74	Some college	White, Non-Hispanic	Male	$60,000 to $74,999	Married	Non-Metro	Midwest	Not working - retired	Yes	No, never	#NULL!	#NULL!	#NULL!	#NULL!	No	Yes	Yes	No	No	No	No	No	No	No	No		Yes	It varies from season to season	Don_t know	0.5819
976	65-74	Bachelor_s degree or higher	Hispanic	Female	$85,000 to $99,999	Married	Metro	South	Not working - retired	No	Yes, some years	Don_t know	No, no effect	No, no effect	Protect myself and others	No	No	Yes	No	No	No	No	No	No	Yes	No	I taught elementary school for 39 years. During that time shots became available. But, when stucents were gettig sick, some teachers were gettig sick, I was not. My confusion, I had built up a resistance. Therefore, only one time, when I was already in the doctor_s office, did I go ahead and get a shot.	Yes	Very effective	Yes, the full cost is paid	1.3453
977	45-54	High school	White, Non-Hispanic	Female	$85,000 to $99,999	Married	Metro	South	Working - as a paid employee	Yes	No, never	#NULL!	#NULL!	#NULL!	#NULL!	No	No	No	No	No	No	No	No	No	No	Yes		No	Don_t know	#NULL!	0.9055
978	55-64	Some college	White, Non-Hispanic	Female	$60,000 to $74,999	Married	Metro	Midwest	Working - as a paid employee	Yes	Yes, every year	Refused	No, no effect	No, no effect	Protect myself and others	#NULL!	#NULL!	#NULL!	#NULL!	#NULL!	#NULL!	#NULL!	#NULL!	#NULL!	#NULL!	#NULL!		Yes	Somewhat effective	Yes, the full cost is paid	0.7736
979	45-54	High school	White, Non-Hispanic	Female	$35,000 to $39,999	Widowed	Metro	South	Not working - retired	No	No, never	#NULL!	#NULL!	#NULL!	#NULL!	No	No	No	No	Yes	No	No	No	No	No	No		Yes	It varies from season to season	Yes, the full cost is paid	1.2205
980	35-44	Some college	Black, Non-Hispanic	Male	$40,000 to $49,999	Married	Metro	Northeast	Working - as a paid employee	Yes	No, never	#NULL!	#NULL!	#NULL!	#NULL!	No	No	No	No	Yes	No	No	No	No	No	No		Yes	Somewhat effective	Yes, but only part of the cost is paid	1.2529
981	65-74	Some college	White, Non-Hispanic	Male	$60,000 to $74,999	Married	Metro	Midwest	Not working - retired	Yes	Yes, every year	Don_t know	No, no effect	No, no effect	Protect myself	#NULL!	#NULL!	#NULL!	#NULL!	#NULL!	#NULL!	#NULL!	#NULL!	#NULL!	#NULL!	#NULL!		Yes	Somewhat effective	Yes, the full cost is paid	0.6439
982	65-74	High school	White, Non-Hispanic	Female	$10,000 to $12,499	Widowed	Metro	Midwest	Not working - retired	No	Yes, every year	$30 to $60	No, no effect	Yes, more likely	Protect myself and others	#NULL!	#NULL!	#NULL!	#NULL!	#NULL!	#NULL!	#NULL!	#NULL!	#NULL!	#NULL!	#NULL!		Yes	Somewhat effective	Yes, but only part of the cost is paid	1.0092
983	55-64	High school	White, Non-Hispanic	Male	$60,000 to $74,999	Married	Metro	Midwest	Working - as a paid employee	No	No, never	#NULL!	#NULL!	#NULL!	#NULL!	Yes	Yes	Yes	No	Yes	No	Yes	Yes	Yes	No	No		Yes	It varies from season to season	No	0.958
984	55-64	High school	White, Non-Hispanic	Male	$85,000 to $99,999	Married	Metro	Midwest	Not working - retired	Yes	Yes, every year	$0	No, no effect	No, no effect	Protect myself and others	#NULL!	#NULL!	#NULL!	#NULL!	#NULL!	#NULL!	#NULL!	#NULL!	#NULL!	#NULL!	#NULL!		Yes	Somewhat effective	Yes, the full cost is paid	0.7502
985	45-54	Some college	Other, Non-Hispanic	Female	$175,000 or more	Divorced	Metro	South	Working - self-employed	Yes	No, never	#NULL!	#NULL!	#NULL!	#NULL!	No	No	No	No	Yes	No	Yes	No	No	No	No		Yes	Don_t know	Don_t know	1.5156
986	65-74	Bachelor_s degree or higher	White, Non-Hispanic	Female	$50,000 to $59,999	Married	Metro	South	Not working - retired	Yes	Yes, every year	$0	No, no effect	No, no effect	Protect myself and others	#NULL!	#NULL!	#NULL!	#NULL!	#NULL!	#NULL!	#NULL!	#NULL!	#NULL!	#NULL!	#NULL!		Yes	It varies from season to season	Yes, the full cost is paid	0.616
987	45-54	Bachelor_s degree or higher	White, Non-Hispanic	Female	$15,000 to $19,999	Divorced	Metro	Northeast	Working - self-employed	Yes	No, never	#NULL!	#NULL!	#NULL!	#NULL!	No	No	No	No	No	Yes	No	No	No	No	No		Yes	Don_t know	Don_t know	0.5667
988	45-54	Less than high school	White, Non-Hispanic	Male	$15,000 to $19,999	Married	Metro	Northeast	Working - self-employed	Yes	Yes, every year	$0	Yes, more likely	No, no effect	Protect myself and others	#NULL!	#NULL!	#NULL!	#NULL!	#NULL!	#NULL!	#NULL!	#NULL!	#NULL!	#NULL!	#NULL!		Yes	Very effective	Yes, the full cost is paid	0.9033
989	18-24	High school	White, Non-Hispanic	Female	$30,000 to $34,999	Married	Non-Metro	South	Working - as a paid employee	Yes	Yes, some years	$0	No, no effect	No, no effect	Protect myself	No	No	No	No	Yes	No	No	No	No	No	No		Yes	Somewhat effective	Don_t know	1.2809
990	55-64	Bachelor_s degree or higher	White, Non-Hispanic	Male	$150,000 to $174,999	Married	Metro	Midwest	Working - as a paid employee	Yes	Yes, every year	$0	No, no effect	No, no effect	Protect myself and others	#NULL!	#NULL!	#NULL!	#NULL!	#NULL!	#NULL!	#NULL!	#NULL!	#NULL!	#NULL!	#NULL!		Yes	Somewhat effective	Yes, the full cost is paid	0.6144
991	55-64	Bachelor_s degree or higher	White, Non-Hispanic	Female	$60,000 to $74,999	Married	Metro	Midwest	Not working - retired	Yes	Yes, every year	$30 to $60	No, no effect	No, no effect	Protect myself	#NULL!	#NULL!	#NULL!	#NULL!	#NULL!	#NULL!	#NULL!	#NULL!	#NULL!	#NULL!	#NULL!		Yes	It varies from season to season	Don_t know	0.6132
992	55-64	Some college	Black, Non-Hispanic	Male	Less than $5,000	Never married	Non-Metro	South	Not working - retired	No	Refused	#NULL!	#NULL!	#NULL!	#NULL!	#NULL!	#NULL!	#NULL!	#NULL!	#NULL!	#NULL!	#NULL!	#NULL!	#NULL!	#NULL!	#NULL!		Refused	Refused	#NULL!	1.3183
993	55-64	Some college	White, Non-Hispanic	Female	$20,000 to $24,999	Married	Non-Metro	South	Not working - disabled	Yes	Yes, every year	$0	No, no effect	No, no effect	Protect myself	#NULL!	#NULL!	#NULL!	#NULL!	#NULL!	#NULL!	#NULL!	#NULL!	#NULL!	#NULL!	#NULL!		Yes	Somewhat effective	Yes, the full cost is paid	0.6665
994	18-24	Some college	White, Non-Hispanic	Female	$75,000 to $84,999	Never married	Metro	South	Working - as a paid employee	Yes	No, never	#NULL!	#NULL!	#NULL!	#NULL!	No	No	No	No	Yes	No	No	No	No	No	No		Yes	It varies from season to season	Yes, the full cost is paid	1.3722
995	18-24	High school	2+ Races, Non-Hispanic	Male	$60,000 to $74,999	Living with partner	Metro	West	Not working - other	Yes	No, never	#NULL!	#NULL!	#NULL!	#NULL!	No	No	No	No	No	No	No	No	No	Yes	No	it weakens humans immune system which the gov. wants so people will really HAVE to get it each year then they will bank off it. Its a good hustle	No	Very effective	#NULL!	0.4364
996	35-44	Bachelor_s degree or higher	White, Non-Hispanic	Male	$60,000 to $74,999	Married	Metro	South	Working - as a paid employee	No	No, never	#NULL!	#NULL!	#NULL!	#NULL!	No	No	No	No	No	No	No	No	Yes	No	No		Yes	Don_t know	Don_t know	1.1432
997	45-54	Bachelor_s degree or higher	White, Non-Hispanic	Male	$85,000 to $99,999	Married	Metro	South	Working - as a paid employee	Yes	No, never	#NULL!	#NULL!	#NULL!	#NULL!	No	No	No	No	Yes	No	No	No	No	No	No		Yes	Somewhat effective	Don_t know	0.7039
998	55-64	Some college	White, Non-Hispanic	Male	$50,000 to $59,999	Divorced	Metro	Midwest	Working - as a paid employee	Yes	No, never	#NULL!	#NULL!	#NULL!	#NULL!	No	Yes	Yes	No	No	No	Yes	No	No	No	No		Yes	It varies from season to season	No	0.7343
999	18-24	High school	White, Non-Hispanic	Female	Less than $5,000	Never married	Metro	Midwest	Working - as a paid employee	No	No, never	#NULL!	#NULL!	#NULL!	#NULL!	No	No	No	No	No	No	Yes	No	No	No	No		Yes	Somewhat effective	Don_t know	1.6644
1000	35-44	Some college	White, Non-Hispanic	Female	$50,000 to $59,999	Married	Metro	Northeast	Working - as a paid employee	Yes	No, never	#NULL!	#NULL!	#NULL!	#NULL!	No	Yes	No	No	Yes	No	No	No	No	No	No		Yes	Somewhat effective	Yes, the full cost is paid	0.9698
1001	35-44	High school	White, Non-Hispanic	Male	$10,000 to $12,499	Never married	Metro	South	Not working - looking for work	No	No, never	#NULL!	#NULL!	#NULL!	#NULL!	Yes	No	Yes	No	No	No	No	No	Yes	No	No		No	Somewhat effective	#NULL!	1.2977
1002	65-74	High school	White, Non-Hispanic	Male	$25,000 to $29,999	Divorced	Non-Metro	South	Not working - retired	Yes	Yes, every year	$0	No, no effect	No, no effect	Protect myself	#NULL!	#NULL!	#NULL!	#NULL!	#NULL!	#NULL!	#NULL!	#NULL!	#NULL!	#NULL!	#NULL!		Yes	Somewhat effective	Yes, the full cost is paid	0.6854
1003	18-24	Some college	White, Non-Hispanic	Male	$30,000 to $34,999	Never married	Metro	South	Not working - looking for work	Yes	Yes, some years	Less than $30	No, no effect	Yes, more likely	Protect myself	No	No	No	No	No	No	Yes	No	No	No	No		Yes	Somewhat effective	Yes, the full cost is paid	1.3806
1004	65-74	Bachelor_s degree or higher	White, Non-Hispanic	Female	$100,000 to $124,999	Married	Metro	South	Not working - retired	Yes	Yes, every year	$0	No, no effect	Refused	Protect myself	#NULL!	#NULL!	#NULL!	#NULL!	#NULL!	#NULL!	#NULL!	#NULL!	#NULL!	#NULL!	#NULL!		Yes	Very effective	Yes, the full cost is paid	0.6994
1005	25-34	Bachelor_s degree or higher	White, Non-Hispanic	Female	$30,000 to $34,999	Married	Metro	West	Working - as a paid employee	Yes	Yes, some years	$0	No, no effect	No, no effect	Protect myself and others	No	No	No	No	No	No	No	Yes	No	No	No		Yes	Very effective	Yes, the full cost is paid	0.9837
1006	25-34	Some college	White, Non-Hispanic	Male	$85,000 to $99,999	Never married	Metro	Northeast	Working - as a paid employee	Yes	No, never	#NULL!	#NULL!	#NULL!	#NULL!	No	No	No	No	No	No	No	No	No	Yes	No	no reason	No	It varies from season to season	#NULL!	0.9941
1007	55-64	Bachelor_s degree or higher	White, Non-Hispanic	Female	$150,000 to $174,999	Married	Metro	Midwest	Working - as a paid employee	Yes	Yes, every year	$0	No, no effect	No, no effect	Protect myself and others	#NULL!	#NULL!	#NULL!	#NULL!	#NULL!	#NULL!	#NULL!	#NULL!	#NULL!	#NULL!	#NULL!		Yes	Somewhat effective	Yes, the full cost is paid	0.7383
1008	35-44	Less than high school	Hispanic	Male	$85,000 to $99,999	Divorced	Metro	South	Working - self-employed	Yes	No, never	#NULL!	#NULL!	#NULL!	#NULL!	No	No	No	No	Yes	No	No	No	No	No	No		Yes	Somewhat effective	Don_t know	1.9946
1009	65-74	Bachelor_s degree or higher	White, Non-Hispanic	Male	$100,000 to $124,999	Married	Metro	Northeast	Working - as a paid employee	Yes	No, never	#NULL!	#NULL!	#NULL!	#NULL!	No	No	No	No	No	No	No	No	No	Yes	No	Build immune systems	Yes	Not effective	Don_t know	0.576
1010	55-64	High school	White, Non-Hispanic	Male	$100,000 to $124,999	Married	Non-Metro	South	Working - as a paid employee	Yes	Yes, some years	$0	No, no effect	No, no effect	Protect myself and others	No	Yes	No	No	No	No	No	Yes	No	No	No		Yes	Somewhat effective	Yes, the full cost is paid	0.8408
1011	55-64	Some college	White, Non-Hispanic	Male	$20,000 to $24,999	Divorced	Metro	Northeast	Not working - other	Yes	No, never	#NULL!	#NULL!	#NULL!	#NULL!	No	No	No	No	No	No	No	No	No	Yes	No	Don_t want it	Yes	Not effective	Don_t know	0.64
1012	25-34	Some college	White, Non-Hispanic	Female	$75,000 to $84,999	Married	Metro	South	Not working - retired	Yes	Yes, every year	Less than $30	No, no effect	Yes, more likely	Protect myself and others	#NULL!	#NULL!	#NULL!	#NULL!	#NULL!	#NULL!	#NULL!	#NULL!	#NULL!	#NULL!	#NULL!		Yes	Very effective	Yes, but only part of the cost is paid	1.1796
1013	18-24	High school	White, Non-Hispanic	Male	$85,000 to $99,999	Never married	Metro	Northeast	Working - as a paid employee	Yes	No, never	#NULL!	#NULL!	#NULL!	#NULL!	No	No	No	No	No	No	Yes	No	No	No	No		Yes	Somewhat effective	Yes, the full cost is paid	1.4224
1014	45-54	Bachelor_s degree or higher	White, Non-Hispanic	Male	$85,000 to $99,999	Married	Metro	Midwest	Working - as a paid employee	Yes	Yes, every year	$0	No, no effect	No, no effect	Protect myself and others	#NULL!	#NULL!	#NULL!	#NULL!	#NULL!	#NULL!	#NULL!	#NULL!	#NULL!	#NULL!	#NULL!		Yes	Very effective	Yes, the full cost is paid	0.7008
1015	55-64	Some college	Black, Non-Hispanic	Male	$40,000 to $49,999	Divorced	Metro	South	Working - as a paid employee	Yes	No, never	#NULL!	#NULL!	#NULL!	#NULL!	No	No	No	No	No	No	No	Yes	No	No	No		Yes	Very effective	Yes, the full cost is paid	1.0555
1016	55-64	Some college	Hispanic	Female	$175,000 or more	Married	Metro	West	Not working - disabled	Yes	No, never	#NULL!	#NULL!	#NULL!	#NULL!	No	No	Yes	No	No	No	No	No	No	No	No		Yes	It varies from season to season	Yes, but only part of the cost is paid	1.0738
1017	35-44	Bachelor_s degree or higher	White, Non-Hispanic	Male	$125,000 to $149,999	Married	Metro	South	Working - as a paid employee	Yes	Yes, some years	Less than $30	No, no effect	No, no effect	Protect myself	No	No	No	No	No	No	No	Yes	No	No	No		Yes	Somewhat effective	Yes, but only part of the cost is paid	0.8953
1018	35-44	Some college	White, Non-Hispanic	Male	$60,000 to $74,999	Never married	Non-Metro	Midwest	Working - as a paid employee	No	No, never	#NULL!	#NULL!	#NULL!	#NULL!	No	Yes	No	No	No	No	No	No	No	No	No		Yes	It varies from season to season	Don_t know	1.2237
1019	65-74	High school	White, Non-Hispanic	Female	$25,000 to $29,999	Never married	Metro	Northeast	Not working - retired	No	No, never	#NULL!	#NULL!	#NULL!	#NULL!	No	Yes	Yes	No	Yes	No	No	No	No	No	No		Yes	Somewhat effective	Yes, the full cost is paid	1.0743
1020	65-74	High school	White, Non-Hispanic	Male	$40,000 to $49,999	Married	Metro	West	Working - as a paid employee	Yes	Yes, every year	$0	No, no effect	No, no effect	Protect myself and others	#NULL!	#NULL!	#NULL!	#NULL!	#NULL!	#NULL!	#NULL!	#NULL!	#NULL!	#NULL!	#NULL!		Yes	Somewhat effective	Yes, the full cost is paid	0.6428
1021	25-34	Bachelor_s degree or higher	2+ Races, Non-Hispanic	Female	$30,000 to $34,999	Living with partner	Non-Metro	Midwest	Working - as a paid employee	Yes	Yes, some years	$0	No, no effect	No, no effect	Protect myself	Yes	Yes	No	Yes	No	No	Yes	Yes	No	No	No		Yes	It varies from season to season	Don_t know	0.342
1022	35-44	Some college	White, Non-Hispanic	Male	$75,000 to $84,999	Married	Metro	West	Working - as a paid employee	Yes	No, never	#NULL!	#NULL!	#NULL!	#NULL!	No	No	No	No	No	No	Yes	Yes	No	No	No		Yes	Somewhat effective	Yes, the full cost is paid	0.977
1023	55-64	Some college	White, Non-Hispanic	Female	$125,000 to $149,999	Married	Metro	Midwest	Working - as a paid employee	Yes	Yes, some years	$0	No, no effect	Refused	Protect myself and others	No	No	No	No	No	No	No	No	No	No	Yes		Yes	Somewhat effective	Yes, the full cost is paid	0.8283
1024	55-64	Some college	White, Non-Hispanic	Male	$150,000 to $174,999	Married	Metro	South	Working - as a paid employee	Yes	Yes, every year	$0	No, no effect	No, no effect	Protect myself and others	#NULL!	#NULL!	#NULL!	#NULL!	#NULL!	#NULL!	#NULL!	#NULL!	#NULL!	#NULL!	#NULL!		Yes	Very effective	Yes, the full cost is paid	0.8375
1025	65-74	Some college	White, Non-Hispanic	Female	$125,000 to $149,999	Married	Metro	West	Not working - retired	Yes	Yes, every year	$0	No, no effect	No, no effect	Protect myself and others	#NULL!	#NULL!	#NULL!	#NULL!	#NULL!	#NULL!	#NULL!	#NULL!	#NULL!	#NULL!	#NULL!		Yes	Somewhat effective	Yes, the full cost is paid	0.7632
1026	65-74	High school	White, Non-Hispanic	Female	$75,000 to $84,999	Divorced	Metro	Northeast	Not working - retired	Yes	No, never	#NULL!	#NULL!	#NULL!	#NULL!	No	No	No	No	Yes	No	Yes	No	No	No	No		Yes	Somewhat effective	Don_t know	0.797
1027	45-54	Some college	White, Non-Hispanic	Male	$100,000 to $124,999	Married	Metro	Midwest	Working - as a paid employee	Yes	Yes, every year	$0	No, no effect	No, no effect	Protect myself and others	#NULL!	#NULL!	#NULL!	#NULL!	#NULL!	#NULL!	#NULL!	#NULL!	#NULL!	#NULL!	#NULL!		Yes	Somewhat effective	Yes, the full cost is paid	0.8337
1028	65-74	Bachelor_s degree or higher	White, Non-Hispanic	Female	$75,000 to $84,999	Married	Non-Metro	South	Not working - retired	Yes	No, never	#NULL!	#NULL!	#NULL!	#NULL!	No	Yes	Yes	No	Yes	No	No	No	No	Yes	No	Unnecessary and risky	Yes	Not effective	Yes, the full cost is paid	0.6841
1029	65-74	High school	White, Non-Hispanic	Male	$60,000 to $74,999	Divorced	Non-Metro	Midwest	Not working - retired	Yes	No, never	#NULL!	#NULL!	#NULL!	#NULL!	No	No	No	No	No	No	No	No	No	Yes	No	it doesn_t work	Yes	Not effective	Don_t know	0.5972
1030	65-74	Some college	White, Non-Hispanic	Female	$50,000 to $59,999	Married	Non-Metro	Midwest	Not working - retired	Yes	Yes, some years	$0	No, no effect	No, no effect	Protect myself and others	No	Yes	Yes	No	Yes	No	No	No	No	No	No		Yes	It varies from season to season	Yes, the full cost is paid	0.6594
1031	18-24	Bachelor_s degree or higher	White, Non-Hispanic	Female	$30,000 to $34,999	Living with partner	Metro	South	Working - as a paid employee	Yes	Yes, some years	$0	Yes, more likely	Refused	Protect myself	No	No	No	No	No	No	No	Yes	No	No	No		Yes	Very effective	Yes, the full cost is paid	1.0724
1032	35-44	Bachelor_s degree or higher	White, Non-Hispanic	Male	$100,000 to $124,999	Married	Metro	West	Working - as a paid employee	Yes	No, never	#NULL!	#NULL!	#NULL!	#NULL!	No	No	Yes	No	No	No	No	No	No	No	No		Yes	Somewhat effective	No	0.8212
1033	35-44	Bachelor_s degree or higher	White, Non-Hispanic	Female	$75,000 to $84,999	Never married	Metro	West	Working - as a paid employee	Yes	No, never	#NULL!	#NULL!	#NULL!	#NULL!	No	No	No	No	No	No	No	No	No	Yes	No	I was hospitalized after getting the flu vaccine many years ago and will not get another one.	Yes	Don_t know	Yes, the full cost is paid	0.9096
1035	65-74	High school	White, Non-Hispanic	Female	$20,000 to $24,999	Married	Metro	Northeast	Not working - retired	No	No, never	#NULL!	#NULL!	#NULL!	#NULL!	No	No	No	No	No	No	No	No	No	Yes	No	never kneew they one	Yes	Don_t know	Don_t know	0.9461
1036	65-74	Some college	White, Non-Hispanic	Male	$20,000 to $24,999	Living with partner	Metro	South	Not working - retired	Yes	No, never	#NULL!	#NULL!	#NULL!	#NULL!	No	No	Yes	No	Yes	Yes	No	No	No	No	No		Yes	Don_t know	Don_t know	0.6012
1037	75+	Some college	White, Non-Hispanic	Female	$40,000 to $49,999	Living with partner	Metro	South	Not working - retired	Yes	Yes, every year	Less than $30	No, no effect	No, no effect	Protect myself and others	#NULL!	#NULL!	#NULL!	#NULL!	#NULL!	#NULL!	#NULL!	#NULL!	#NULL!	#NULL!	#NULL!		Yes	It varies from season to season	Yes, but only part of the cost is paid	0.7736
1038	55-64	Bachelor_s degree or higher	White, Non-Hispanic	Female	$75,000 to $84,999	Living with partner	Metro	Northeast	Not working - looking for work	Yes	Yes, some years	Less than $30	No, no effect	No, no effect	Protect myself	No	No	No	No	Yes	No	Yes	No	No	No	No		Yes	Somewhat effective	Yes, the full cost is paid	0.6527
1039	35-44	High school	White, Non-Hispanic	Male	$40,000 to $49,999	Married	Non-Metro	West	Working - as a paid employee	Yes	No, never	#NULL!	#NULL!	#NULL!	#NULL!	No	Yes	No	No	No	No	No	No	No	No	No		No	Not effective	#NULL!	1.5948
1040	35-44	Bachelor_s degree or higher	White, Non-Hispanic	Male	$100,000 to $124,999	Married	Metro	South	Working - as a paid employee	Yes	No, never	#NULL!	#NULL!	#NULL!	#NULL!	No	No	Yes	No	No	No	No	No	No	No	No		Yes	Somewhat effective	Yes, the full cost is paid	0.8953
1041	18-24	Some college	Hispanic	Female	$25,000 to $29,999	Never married	Metro	Midwest	Working - as a paid employee	Yes	Yes, every year	$0	No, no effect	No, no effect	Protect myself and others	#NULL!	#NULL!	#NULL!	#NULL!	#NULL!	#NULL!	#NULL!	#NULL!	#NULL!	#NULL!	#NULL!		Yes	Somewhat effective	Don_t know	1.6853
1042	65-74	Some college	White, Non-Hispanic	Female	$20,000 to $24,999	Widowed	Metro	West	Not working - retired	Yes	Yes, every year	$0	No, no effect	No, no effect	Protect myself and others	#NULL!	#NULL!	#NULL!	#NULL!	#NULL!	#NULL!	#NULL!	#NULL!	#NULL!	#NULL!	#NULL!		Yes	Somewhat effective	Yes, the full cost is paid	0.625
1043	75+	Some college	White, Non-Hispanic	Female	$35,000 to $39,999	Married	Metro	South	Not working - retired	Yes	No, never	#NULL!	#NULL!	#NULL!	#NULL!	No	Yes	No	No	Yes	No	No	No	No	No	No		Yes	Somewhat effective	Yes, the full cost is paid	0.7736
1044	45-54	High school	Hispanic	Female	$40,000 to $49,999	Married	Metro	Northeast	Working - as a paid employee	Yes	No, never	#NULL!	#NULL!	#NULL!	#NULL!	No	No	No	No	No	Yes	No	No	No	No	No		Yes	Somewhat effective	Yes, the full cost is paid	1.0426
1045	65-74	High school	White, Non-Hispanic	Female	$100,000 to $124,999	Married	Metro	Midwest	Not working - retired	Yes	Yes, every year	Less than $30	No, no effect	No, no effect	Protect myself	#NULL!	#NULL!	#NULL!	#NULL!	#NULL!	#NULL!	#NULL!	#NULL!	#NULL!	#NULL!	#NULL!		Yes	It varies from season to season	Yes, the full cost is paid	0.8501
1046	25-34	High school	White, Non-Hispanic	Male	$85,000 to $99,999	Never married	Metro	South	Working - as a paid employee	Yes	Yes, every year	$0	No, no effect	No, no effect	Protect myself and others	#NULL!	#NULL!	#NULL!	#NULL!	#NULL!	#NULL!	#NULL!	#NULL!	#NULL!	#NULL!	#NULL!		Yes	It varies from season to season	Yes, the full cost is paid	1.524
1047	45-54	High school	White, Non-Hispanic	Female	$20,000 to $24,999	Divorced	Metro	Northeast	Not working - disabled	Yes	No, never	#NULL!	#NULL!	#NULL!	#NULL!	No	No	No	No	No	Yes	No	No	No	No	No		Yes	Somewhat effective	Yes, the full cost is paid	0.692
1048	25-34	Bachelor_s degree or higher	2+ Races, Non-Hispanic	Female	$40,000 to $49,999	Married	Metro	West	Not working - other	Yes	No, never	#NULL!	#NULL!	#NULL!	#NULL!	No	Yes	No	No	Yes	No	No	No	No	No	No		Yes	Not effective	Don_t know	0.3487
1049	55-64	High school	2+ Races, Non-Hispanic	Female	Less than $5,000	Divorced	Metro	Northeast	Not working - disabled	No	No, never	#NULL!	#NULL!	#NULL!	#NULL!	No	No	No	No	No	No	No	No	No	Yes	No	do NOT do vaccines	Yes	Not effective	Yes, the full cost is paid	0.3354
1050	45-54	Some college	White, Non-Hispanic	Male	$100,000 to $124,999	Married	Metro	Northeast	Working - as a paid employee	Yes	No, never	#NULL!	#NULL!	#NULL!	#NULL!	No	Yes	No	No	Yes	No	Yes	No	No	Yes	No	70_s swine flu vacc	Yes	Not effective	Don_t know	0.7816
1051	55-64	High school	Hispanic	Female	$85,000 to $99,999	Married	Metro	South	Working - as a paid employee	Yes	No, never	#NULL!	#NULL!	#NULL!	#NULL!	No	Yes	No	No	Yes	No	No	No	No	No	No		Yes	Somewhat effective	Yes, the full cost is paid	1.2014
1052	55-64	Some college	Black, Non-Hispanic	Male	$35,000 to $39,999	Never married	Metro	Midwest	Working - as a paid employee	No	Yes, every year	$0	No, less likely	No, less likely	Protect myself and others	#NULL!	#NULL!	#NULL!	#NULL!	#NULL!	#NULL!	#NULL!	#NULL!	#NULL!	#NULL!	#NULL!		Yes	Don_t know	Yes, but only part of the cost is paid	1.5234
1054	35-44	Bachelor_s degree or higher	White, Non-Hispanic	Female	$60,000 to $74,999	Married	Non-Metro	Midwest	Not working - other	Yes	Yes, some years	$0	No, no effect	No, no effect	Protect myself and others	No	Yes	No	No	No	No	Yes	Yes	No	No	No		Yes	It varies from season to season	Yes, the full cost is paid	0.7858
1055	55-64	Bachelor_s degree or higher	White, Non-Hispanic	Male	$125,000 to $149,999	Married	Metro	West	Not working - retired	Yes	Yes, every year	$0	No, no effect	No, no effect	Protect myself and others	#NULL!	#NULL!	#NULL!	#NULL!	#NULL!	#NULL!	#NULL!	#NULL!	#NULL!	#NULL!	#NULL!		Yes	Somewhat effective	Yes, the full cost is paid	0.5662
1056	18-24	High school	2+ Races, Non-Hispanic	Female	Less than $5,000	Living with partner	Metro	Midwest	Not working - other	Yes	Yes, every year	$0	Yes, more likely	Yes, more likely	Protect myself	#NULL!	#NULL!	#NULL!	#NULL!	#NULL!	#NULL!	#NULL!	#NULL!	#NULL!	#NULL!	#NULL!		Yes	Very effective	Yes, the full cost is paid	0.4069
1057	65-74	Bachelor_s degree or higher	Other, Non-Hispanic	Female	$100,000 to $124,999	Married	Non-Metro	West	Working - as a paid employee	No	Yes, every year	$0	No, no effect	No, no effect	Protect myself and others	#NULL!	#NULL!	#NULL!	#NULL!	#NULL!	#NULL!	#NULL!	#NULL!	#NULL!	#NULL!	#NULL!		Yes	It varies from season to season	Yes, the full cost is paid	2.5953
1058	55-64	Bachelor_s degree or higher	White, Non-Hispanic	Female	$100,000 to $124,999	Married	Metro	West	Not working - other	Yes	Yes, some years	$0	No, no effect	No, no effect	Protect myself and others	No	No	No	No	No	No	No	No	No	Yes	No	With my insurance it is not easy to find a location to get it	Yes	Somewhat effective	Yes, the full cost is paid	0.6802
1059	55-64	High school	White, Non-Hispanic	Male	$100,000 to $124,999	Divorced	Metro	Northeast	Working - as a paid employee	No	Yes, every year	Don_t know	No, no effect	No, no effect	Protect myself	#NULL!	#NULL!	#NULL!	#NULL!	#NULL!	#NULL!	#NULL!	#NULL!	#NULL!	#NULL!	#NULL!		Yes	Don_t know	Don_t know	1.163
1060	25-34	Bachelor_s degree or higher	White, Non-Hispanic	Male	$40,000 to $49,999	Never married	Metro	Northeast	Working - as a paid employee	Yes	No, never	#NULL!	#NULL!	#NULL!	#NULL!	No	No	Yes	No	No	No	No	No	No	No	No		Yes	Somewhat effective	Yes, the full cost is paid	1.0831
1061	65-74	High school	White, Non-Hispanic	Female	$75,000 to $84,999	Widowed	Metro	Northeast	Working - as a paid employee	No	Yes, every year	$0	No, no effect	No, no effect	Protect myself and others	#NULL!	#NULL!	#NULL!	#NULL!	#NULL!	#NULL!	#NULL!	#NULL!	#NULL!	#NULL!	#NULL!		Yes	It varies from season to season	Yes, the full cost is paid	1.1555
1062	25-34	Some college	Black, Non-Hispanic	Female	$20,000 to $24,999	Living with partner	Metro	South	Not working - on temporary layoff from a job	No	No, never	#NULL!	#NULL!	#NULL!	#NULL!	No	No	No	No	No	No	No	Yes	No	No	No		Yes	Don_t know	Don_t know	2.208
1063	45-54	High school	White, Non-Hispanic	Male	$10,000 to $12,499	Divorced	Metro	South	Not working - disabled	No	No, never	#NULL!	#NULL!	#NULL!	#NULL!	No	No	Yes	No	No	No	No	No	No	No	No		Yes	Somewhat effective	Yes, the full cost is paid	1.0203
1064	18-24	High school	White, Non-Hispanic	Male	$100,000 to $124,999	Never married	Metro	Northeast	Working - as a paid employee	Yes	No, never	#NULL!	#NULL!	#NULL!	#NULL!	Yes	No	No	No	No	No	No	No	No	No	No		Yes	Very effective	No	1.4224
1065	35-44	High school	White, Non-Hispanic	Male	$40,000 to $49,999	Divorced	Non-Metro	Midwest	Working - as a paid employee	Yes	No, never	#NULL!	#NULL!	#NULL!	#NULL!	No	No	No	No	Yes	No	No	No	No	No	No		Yes	Somewhat effective	Don_t know	0.9145
1066	55-64	Some college	Hispanic	Female	$100,000 to $124,999	Married	Metro	South	Working - as a paid employee	Yes	No, never	#NULL!	#NULL!	#NULL!	#NULL!	No	No	No	No	Yes	No	No	No	No	No	No		Yes	Not effective	Yes, the full cost is paid	1.1706
1067	25-34	High school	Other, Non-Hispanic	Male	$150,000 to $174,999	Never married	Metro	West	Working - as a paid employee	Yes	Yes, every year	Less than $30	Yes, more likely	Yes, more likely	Protect myself and others	#NULL!	#NULL!	#NULL!	#NULL!	#NULL!	#NULL!	#NULL!	#NULL!	#NULL!	#NULL!	#NULL!		Yes	Very effective	Yes, the full cost is paid	2.4016
1068	35-44	High school	White, Non-Hispanic	Male	Less than $5,000	Married	Metro	South	Not working - looking for work	Yes	No, never	#NULL!	#NULL!	#NULL!	#NULL!	No	No	No	No	No	No	No	No	No	Yes	No	DON_T GET SICK	Yes	Somewhat effective	Yes, the full cost is paid	0.8951
1069	75+	High school	White, Non-Hispanic	Female	$40,000 to $49,999	Married	Metro	South	Not working - retired	Yes	Yes, every year	$0	No, no effect	No, no effect	Protect myself and others	#NULL!	#NULL!	#NULL!	#NULL!	#NULL!	#NULL!	#NULL!	#NULL!	#NULL!	#NULL!	#NULL!		Yes	Somewhat effective	Yes, the full cost is paid	0.794
1070	45-54	Bachelor_s degree or higher	White, Non-Hispanic	Female	$60,000 to $74,999	Married	Metro	Midwest	Working - as a paid employee	Yes	No, never	#NULL!	#NULL!	#NULL!	#NULL!	No	No	No	No	No	No	No	No	No	Yes	No	Not interested	Yes	Somewhat effective	Don_t know	0.6502
1071	35-44	Bachelor_s degree or higher	Other, Non-Hispanic	Male	$100,000 to $124,999	Married	Metro	South	Working - as a paid employee	Yes	Yes, every year	Less than $30	Yes, more likely	No, no effect	Protect myself	#NULL!	#NULL!	#NULL!	#NULL!	#NULL!	#NULL!	#NULL!	#NULL!	#NULL!	#NULL!	#NULL!		Yes	Somewhat effective	Yes, but only part of the cost is paid	1.538
1072	18-24	High school	White, Non-Hispanic	Male	$100,000 to $124,999	Never married	Non-Metro	Midwest	Not working - other	Yes	No, never	#NULL!	#NULL!	#NULL!	#NULL!	No	No	No	No	No	No	No	Yes	No	No	No		Yes	It varies from season to season	Don_t know	1.3712
1073	45-54	Bachelor_s degree or higher	2+ Races, Non-Hispanic	Male	$125,000 to $149,999	Married	Metro	West	Working - as a paid employee	Yes	Yes, every year	Less than $30	No, no effect	No, no effect	Protect myself and others	#NULL!	#NULL!	#NULL!	#NULL!	#NULL!	#NULL!	#NULL!	#NULL!	#NULL!	#NULL!	#NULL!		Yes	Somewhat effective	Yes, the full cost is paid	0.2705
1074	45-54	Less than high school	White, Non-Hispanic	Male	$5,000 to $7,499	Never married	Metro	South	Not working - disabled	No	Refused	#NULL!	#NULL!	#NULL!	#NULL!	#NULL!	#NULL!	#NULL!	#NULL!	#NULL!	#NULL!	#NULL!	#NULL!	#NULL!	#NULL!	#NULL!		Yes	Don_t know	Refused	1.4031
1075	65-74	Bachelor_s degree or higher	White, Non-Hispanic	Male	$100,000 to $124,999	Married	Metro	South	Not working - retired	Yes	Yes, every year	$0	No, no effect	Yes, more likely	Protect myself and others	#NULL!	#NULL!	#NULL!	#NULL!	#NULL!	#NULL!	#NULL!	#NULL!	#NULL!	#NULL!	#NULL!		Yes	Very effective	Yes, the full cost is paid	0.6172
1076	45-54	High school	Black, Non-Hispanic	Female	$5,000 to $7,499	Never married	Metro	Northeast	Not working - other	No	Yes, some years	$0	No, no effect	No, no effect	Protect myself and others	No	No	No	No	No	No	No	No	Yes	No	No		Yes	Very effective	Don_t know	1.3599
1077	18-24	Bachelor_s degree or higher	White, Non-Hispanic	Female	$150,000 to $174,999	Never married	Metro	Midwest	Working - as a paid employee	Yes	Yes, some years	Don_t know	Yes, more likely	No, less likely	Protect myself	No	No	Yes	No	No	No	No	Yes	No	No	No		Yes	Somewhat effective	Don_t know	1.1482
1078	65-74	Some college	White, Non-Hispanic	Male	$100,000 to $124,999	Married	Metro	South	Not working - retired	Yes	Yes, every year	$0	No, no effect	No, no effect	Protect myself	#NULL!	#NULL!	#NULL!	#NULL!	#NULL!	#NULL!	#NULL!	#NULL!	#NULL!	#NULL!	#NULL!		Yes	Somewhat effective	Yes, the full cost is paid	0.7343
1079	65-74	Bachelor_s degree or higher	White, Non-Hispanic	Female	$25,000 to $29,999	Divorced	Metro	Northeast	Working - as a paid employee	Yes	No, never	#NULL!	#NULL!	#NULL!	#NULL!	No	No	No	No	No	No	No	No	No	Yes	No	when I_ve had the shot I contracted the Flu when I have not I have been fine.	Yes	Not effective	Yes, the full cost is paid	0.6069
1080	55-64	High school	White, Non-Hispanic	Male	$85,000 to $99,999	Married	Metro	South	Working - as a paid employee	Yes	Yes, every year	Less than $30	No, no effect	No, no effect	Protect myself	#NULL!	#NULL!	#NULL!	#NULL!	#NULL!	#NULL!	#NULL!	#NULL!	#NULL!	#NULL!	#NULL!		Yes	Very effective	Yes, the full cost is paid	0.7536
1081	55-64	Bachelor_s degree or higher	Black, Non-Hispanic	Male	$150,000 to $174,999	Never married	Metro	Northeast	Working - as a paid employee	Yes	Yes, every year	$0	No, no effect	No, no effect	Protect myself and others	#NULL!	#NULL!	#NULL!	#NULL!	#NULL!	#NULL!	#NULL!	#NULL!	#NULL!	#NULL!	#NULL!		Yes	Very effective	Yes, the full cost is paid	0.8906
1082	75+	High school	White, Non-Hispanic	Female	$75,000 to $84,999	Divorced	Metro	West	Not working - retired	Yes	No, never	#NULL!	#NULL!	#NULL!	#NULL!	No	Yes	No	No	Yes	No	No	No	No	No	No		Yes	Somewhat effective	Yes, the full cost is paid	0.7833
1083	45-54	Some college	Black, Non-Hispanic	Male	$20,000 to $24,999	Never married	Metro	South	Working - self-employed	Yes	No, never	#NULL!	#NULL!	#NULL!	#NULL!	No	Yes	Yes	No	Yes	No	No	No	No	No	No		No	Don_t know	#NULL!	0.9295
1084	55-64	Bachelor_s degree or higher	White, Non-Hispanic	Female	$125,000 to $149,999	Married	Metro	Midwest	Not working - retired	Yes	No, never	#NULL!	#NULL!	#NULL!	#NULL!	No	No	No	No	Yes	No	No	No	No	No	No		Yes	Very effective	Yes, the full cost is paid	0.6962
1085	55-64	High school	White, Non-Hispanic	Male	$50,000 to $59,999	Married	Non-Metro	South	Working - as a paid employee	Yes	No, never	#NULL!	#NULL!	#NULL!	#NULL!	No	No	No	No	Yes	No	No	No	No	No	No		Yes	It varies from season to season	Don_t know	0.7406
1087	55-64	High school	Hispanic	Female	$60,000 to $74,999	Divorced	Metro	Midwest	Working - as a paid employee	No	Yes, some years	Less than $30	Yes, more likely	No, less likely	Protect myself and others	No	No	Yes	No	Yes	No	No	No	No	No	No		Yes	Somewhat effective	Yes, the full cost is paid	1.5273
1088	25-34	Less than high school	Black, Non-Hispanic	Female	Less than $5,000	Never married	Metro	Midwest	Not working - looking for work	No	Yes, some years	$0	Yes, more likely	Yes, more likely	Protect myself and others	No	No	No	No	No	No	Yes	No	No	No	No		Yes	Very effective	Yes, the full cost is paid	2.5953
1089	65-74	Bachelor_s degree or higher	White, Non-Hispanic	Female	$85,000 to $99,999	Married	Metro	West	Not working - retired	Yes	Yes, every year	Less than $30	Yes, more likely	Yes, more likely	Protect myself and others	#NULL!	#NULL!	#NULL!	#NULL!	#NULL!	#NULL!	#NULL!	#NULL!	#NULL!	#NULL!	#NULL!		Yes	Somewhat effective	Yes, the full cost is paid	0.6415
1090	65-74	Bachelor_s degree or higher	White, Non-Hispanic	Female	$175,000 or more	Married	Metro	Northeast	Not working - retired	Yes	Yes, every year	$0	No, no effect	Yes, more likely	Protect myself and others	#NULL!	#NULL!	#NULL!	#NULL!	#NULL!	#NULL!	#NULL!	#NULL!	#NULL!	#NULL!	#NULL!		Yes	Somewhat effective	Yes, the full cost is paid	0.6527
1091	35-44	High school	Black, Non-Hispanic	Female	$20,000 to $24,999	Never married	Metro	West	Working - as a paid employee	Yes	No, never	#NULL!	#NULL!	#NULL!	#NULL!	No	No	No	No	No	No	No	No	No	No	Yes		Yes	Don_t know	Yes, the full cost is paid	1.2327
1092	25-34	Some college	Hispanic	Male	$50,000 to $59,999	Divorced	Metro	South	Not working - looking for work	Yes	No, never	#NULL!	#NULL!	#NULL!	#NULL!	Yes	Yes	No	No	No	No	No	No	No	No	No		No	Somewhat effective	#NULL!	1.2447
1093	25-34	Some college	White, Non-Hispanic	Male	$35,000 to $39,999	Never married	Metro	Northeast	Working - as a paid employee	Yes	No, never	#NULL!	#NULL!	#NULL!	#NULL!	No	No	No	No	No	No	No	No	No	No	Yes		No	Don_t know	#NULL!	1.2886
1094	45-54	Bachelor_s degree or higher	White, Non-Hispanic	Female	$175,000 or more	Married	Metro	Northeast	Working - self-employed	Yes	Yes, some years	$0	No, no effect	No, no effect	Protect myself	No	Yes	No	No	No	No	No	No	No	No	No		Yes	Somewhat effective	Yes, the full cost is paid	0.6921
1095	55-64	Some college	2+ Races, Non-Hispanic	Male	$10,000 to $12,499	Separated	Non-Metro	South	Not working - retired	No	No, never	#NULL!	#NULL!	#NULL!	#NULL!	No	Yes	No	No	Yes	No	No	No	No	No	No		No	Somewhat effective	#NULL!	0.3447
1096	55-64	Bachelor_s degree or higher	Black, Non-Hispanic	Male	$150,000 to $174,999	Married	Metro	South	Working - as a paid employee	Yes	Yes, every year	Less than $30	Yes, more likely	No, no effect	Protect myself	#NULL!	#NULL!	#NULL!	#NULL!	#NULL!	#NULL!	#NULL!	#NULL!	#NULL!	#NULL!	#NULL!		Yes	Somewhat effective	Yes, but only part of the cost is paid	0.8366
1097	45-54	Some college	White, Non-Hispanic	Female	$100,000 to $124,999	Married	Metro	South	Working - as a paid employee	Yes	Yes, every year	$0	Yes, more likely	Yes, more likely	Protect myself and others	#NULL!	#NULL!	#NULL!	#NULL!	#NULL!	#NULL!	#NULL!	#NULL!	#NULL!	#NULL!	#NULL!		Yes	Somewhat effective	Yes, the full cost is paid	0.8822
1098	65-74	High school	White, Non-Hispanic	Female	$40,000 to $49,999	Married	Metro	West	Not working - retired	Yes	Yes, every year	$0	No, no effect	No, no effect	Protect myself and others	#NULL!	#NULL!	#NULL!	#NULL!	#NULL!	#NULL!	#NULL!	#NULL!	#NULL!	#NULL!	#NULL!		Yes	Very effective	Yes, the full cost is paid	0.7283
1099	25-34	Bachelor_s degree or higher	White, Non-Hispanic	Female	$50,000 to $59,999	Never married	Metro	Northeast	Working - as a paid employee	Yes	Yes, some years	Less than $30	No, no effect	Yes, more likely	Protect myself and others	No	Yes	No	No	No	No	No	No	No	No	No		Yes	Somewhat effective	Yes, but only part of the cost is paid	0.9482
1100	55-64	Some college	White, Non-Hispanic	Female	$25,000 to $29,999	Divorced	Metro	West	Working - self-employed	Yes	Yes, some years	Less than $30	No, no effect	No, no effect	Protect myself and others	No	No	No	No	No	No	No	Yes	No	No	No		Yes	Somewhat effective	Yes, but only part of the cost is paid	0.7097
1101	55-64	Some college	White, Non-Hispanic	Female	$75,000 to $84,999	Married	Metro	Northeast	Not working - other	Yes	Yes, every year	$0	Yes, more likely	Yes, more likely	Protect myself and others	#NULL!	#NULL!	#NULL!	#NULL!	#NULL!	#NULL!	#NULL!	#NULL!	#NULL!	#NULL!	#NULL!		Yes	Very effective	Yes, the full cost is paid	0.8234
1102	55-64	High school	White, Non-Hispanic	Male	$60,000 to $74,999	Married	Metro	Midwest	Working - as a paid employee	Yes	Yes, every year	$0	No, no effect	No, no effect	Protect myself and others	#NULL!	#NULL!	#NULL!	#NULL!	#NULL!	#NULL!	#NULL!	#NULL!	#NULL!	#NULL!	#NULL!		Yes	Somewhat effective	No	0.7537
1103	75+	High school	White, Non-Hispanic	Male	$40,000 to $49,999	Married	Non-Metro	Midwest	Not working - retired	Yes	No, never	#NULL!	#NULL!	#NULL!	#NULL!	No	Yes	No	No	No	No	No	No	No	No	No		Yes	Somewhat effective	Yes, but only part of the cost is paid	0.6305
1104	55-64	High school	White, Non-Hispanic	Female	$60,000 to $74,999	Living with partner	Non-Metro	Midwest	Working - as a paid employee	No	No, never	#NULL!	#NULL!	#NULL!	#NULL!	No	Yes	No	No	No	No	Yes	No	No	Yes	No	don not trust the vaccine	Yes	Not effective	Don_t know	1.0403
1105	75+	Some college	White, Non-Hispanic	Male	$20,000 to $24,999	Widowed	Metro	Midwest	Not working - retired	Yes	Yes, every year	Don_t know	Yes, more likely	Yes, more likely	Protect myself and others	#NULL!	#NULL!	#NULL!	#NULL!	#NULL!	#NULL!	#NULL!	#NULL!	#NULL!	#NULL!	#NULL!		Yes	Very effective	Yes, the full cost is paid	0.5986
1106	65-74	Bachelor_s degree or higher	White, Non-Hispanic	Male	$125,000 to $149,999	Married	Metro	Midwest	Not working - retired	Yes	Yes, every year	$0	No, no effect	Yes, more likely	Protect myself and others	#NULL!	#NULL!	#NULL!	#NULL!	#NULL!	#NULL!	#NULL!	#NULL!	#NULL!	#NULL!	#NULL!		Yes	Somewhat effective	Yes, the full cost is paid	0.6144
1107	25-34	High school	Hispanic	Female	$30,000 to $34,999	Living with partner	Metro	Northeast	Working - as a paid employee	Yes	No, never	#NULL!	#NULL!	#NULL!	#NULL!	No	No	No	No	Yes	No	Yes	No	No	No	No		No	Not effective	#NULL!	1.394
1108	75+	High school	White, Non-Hispanic	Female	$10,000 to $12,499	Widowed	Non-Metro	Midwest	Not working - retired	No	Yes, every year	$0	No, no effect	No, no effect	Protect myself and others	#NULL!	#NULL!	#NULL!	#NULL!	#NULL!	#NULL!	#NULL!	#NULL!	#NULL!	#NULL!	#NULL!		Yes	Somewhat effective	Yes, the full cost is paid	0.9121
1109	65-74	Bachelor_s degree or higher	White, Non-Hispanic	Female	$100,000 to $124,999	Married	Metro	Midwest	Not working - retired	Yes	Yes, every year	$0	No, less likely	Yes, more likely	Protect myself and others	#NULL!	#NULL!	#NULL!	#NULL!	#NULL!	#NULL!	#NULL!	#NULL!	#NULL!	#NULL!	#NULL!		Yes	It varies from season to season	Yes, the full cost is paid	0.6962
1110	55-64	Some college	2+ Races, Non-Hispanic	Male	$60,000 to $74,999	Married	Non-Metro	South	Not working - retired	Yes	Yes, every year	Less than $30	Yes, more likely	No, no effect	Protect myself and others	#NULL!	#NULL!	#NULL!	#NULL!	#NULL!	#NULL!	#NULL!	#NULL!	#NULL!	#NULL!	#NULL!		Yes	It varies from season to season	Yes, but only part of the cost is paid	0.2705
1111	18-24	Some college	Hispanic	Female	$75,000 to $84,999	Never married	Metro	South	Not working - other	Yes	No, never	#NULL!	#NULL!	#NULL!	#NULL!	No	No	No	No	Yes	No	No	No	No	No	No		Yes	Somewhat effective	Yes, the full cost is paid	1.8207
1112	45-54	High school	2+ Races, Non-Hispanic	Male	$100,000 to $124,999	Divorced	Metro	Northeast	Working - as a paid employee	Yes	No, never	#NULL!	#NULL!	#NULL!	#NULL!	No	No	No	No	No	No	No	No	No	Yes	No	didnt know i needed it	Yes	Very effective	Yes, the full cost is paid	0.2843
1113	35-44	High school	White, Non-Hispanic	Male	$15,000 to $19,999	Married	Non-Metro	South	Not working - other	No	No, never	#NULL!	#NULL!	#NULL!	#NULL!	No	No	No	No	No	No	Yes	No	No	No	No		No	Don_t know	#NULL!	1.2694
1114	75+	High school	White, Non-Hispanic	Male	$15,000 to $19,999	Widowed	Metro	South	Not working - retired	Yes	Yes, every year	$0	Yes, more likely	Yes, more likely	Protect myself and others	#NULL!	#NULL!	#NULL!	#NULL!	#NULL!	#NULL!	#NULL!	#NULL!	#NULL!	#NULL!	#NULL!		Yes	Somewhat effective	Yes, the full cost is paid	0.6171
1115	65-74	Bachelor_s degree or higher	White, Non-Hispanic	Female	$40,000 to $49,999	Married	Metro	Northeast	Not working - retired	Yes	Yes, some years	$0	No, no effect	No, no effect	Protect myself and others	No	No	No	No	No	No	No	Yes	No	No	No		Yes	Somewhat effective	Yes, the full cost is paid	0.6069
1116	45-54	High school	White, Non-Hispanic	Male	$30,000 to $34,999	Married	Metro	Northeast	Working - as a paid employee	Yes	No, never	#NULL!	#NULL!	#NULL!	#NULL!	No	Yes	No	No	No	No	No	No	No	No	No		Yes	Very effective	Yes, the full cost is paid	0.7459
1117	25-34	Bachelor_s degree or higher	White, Non-Hispanic	Female	$60,000 to $74,999	Living with partner	Metro	Midwest	Working - as a paid employee	Yes	Yes, some years	Less than $30	No, no effect	No, no effect	Protect myself	No	No	No	No	No	No	No	Yes	No	No	No		Yes	Somewhat effective	Yes, the full cost is paid	1.0114
1118	35-44	Bachelor_s degree or higher	White, Non-Hispanic	Female	$75,000 to $84,999	Married	Non-Metro	South	Working - as a paid employee	No	Yes, some years	Less than $30	No, no effect	No, no effect	Protect myself	No	Yes	No	No	No	No	No	No	No	No	No		Yes	Not effective	Don_t know	1.4062
1119	45-54	Some college	White, Non-Hispanic	Female	$75,000 to $84,999	Married	Metro	South	Not working - other	Yes	Yes, every year	Less than $30	No, no effect	No, no effect	Protect myself	#NULL!	#NULL!	#NULL!	#NULL!	#NULL!	#NULL!	#NULL!	#NULL!	#NULL!	#NULL!	#NULL!		Yes	Somewhat effective	Don_t know	0.8822
1121	45-54	Bachelor_s degree or higher	White, Non-Hispanic	Male	$85,000 to $99,999	Married	Metro	Northeast	Working - as a paid employee	Yes	Yes, every year	Less than $30	No, no effect	No, no effect	Protect myself and others	#NULL!	#NULL!	#NULL!	#NULL!	#NULL!	#NULL!	#NULL!	#NULL!	#NULL!	#NULL!	#NULL!		Yes	It varies from season to season	Yes, the full cost is paid	0.657
1122	35-44	High school	White, Non-Hispanic	Male	$50,000 to $59,999	Never married	Non-Metro	West	Working - as a paid employee	Yes	Yes, some years	Don_t know	No, no effect	No, no effect	Protect myself	Yes	Yes	Yes	No	No	No	No	No	No	No	No		Yes	Don_t know	Don_t know	1.5107
1123	45-54	Some college	Black, Non-Hispanic	Male	$20,000 to $24,999	Married	Metro	South	Not working - disabled	Yes	No, never	#NULL!	#NULL!	#NULL!	#NULL!	No	No	No	No	No	No	Yes	No	No	No	No		No	Not effective	#NULL!	0.9295
1124	45-54	Some college	White, Non-Hispanic	Female	$100,000 to $124,999	Married	Metro	South	Working - as a paid employee	Yes	Yes, every year	$0	Yes, more likely	Yes, more likely	Protect myself	#NULL!	#NULL!	#NULL!	#NULL!	#NULL!	#NULL!	#NULL!	#NULL!	#NULL!	#NULL!	#NULL!		Yes	Somewhat effective	Yes, the full cost is paid	0.8822
1125	25-34	Bachelor_s degree or higher	White, Non-Hispanic	Female	$85,000 to $99,999	Married	Metro	West	Working - as a paid employee	Yes	No, never	#NULL!	#NULL!	#NULL!	#NULL!	No	No	No	No	No	No	No	Yes	No	No	No		Yes	Somewhat effective	Yes, the full cost is paid	1.058
1126	65-74	High school	2+ Races, Non-Hispanic	Female	$60,000 to $74,999	Married	Metro	West	Not working - retired	Yes	Yes, every year	$0	Yes, more likely	Yes, more likely	Protect myself and others	#NULL!	#NULL!	#NULL!	#NULL!	#NULL!	#NULL!	#NULL!	#NULL!	#NULL!	#NULL!	#NULL!		Yes	Somewhat effective	Yes, the full cost is paid	0.2705
1127	65-74	High school	White, Non-Hispanic	Female	$85,000 to $99,999	Married	Non-Metro	Midwest	Not working - retired	Yes	Yes, every year	Don_t know	No, no effect	No, no effect	Protect myself and others	#NULL!	#NULL!	#NULL!	#NULL!	#NULL!	#NULL!	#NULL!	#NULL!	#NULL!	#NULL!	#NULL!		Yes	Very effective	Yes, the full cost is paid	0.7683
1128	35-44	High school	White, Non-Hispanic	Male	$25,000 to $29,999	Never married	Metro	West	Working - as a paid employee	Yes	No, never	#NULL!	#NULL!	#NULL!	#NULL!	No	No	Yes	No	Yes	No	No	Yes	No	No	No		Yes	Not effective	Don_t know	0.9324
1129	65-74	Less than high school	White, Non-Hispanic	Female	$60,000 to $74,999	Married	Metro	South	Working - as a paid employee	Yes	Yes, every year	$0	Yes, more likely	Yes, more likely	Protect myself and others	#NULL!	#NULL!	#NULL!	#NULL!	#NULL!	#NULL!	#NULL!	#NULL!	#NULL!	#NULL!	#NULL!		Yes	Somewhat effective	Yes, the full cost is paid	1.0343
1130	55-64	Bachelor_s degree or higher	White, Non-Hispanic	Male	$60,000 to $74,999	Married	Metro	West	Working - as a paid employee	Yes	No, never	#NULL!	#NULL!	#NULL!	#NULL!	No	No	Yes	No	No	No	No	No	No	No	No		Yes	Somewhat effective	Yes, the full cost is paid	0.5687
1131	55-64	Some college	Black, Non-Hispanic	Female	$35,000 to $39,999	Widowed	Metro	Midwest	Not working - retired	Yes	No, never	#NULL!	#NULL!	#NULL!	#NULL!	No	Yes	No	No	No	No	Yes	No	No	No	No		Yes	Not effective	Yes, the full cost is paid	1.044
1132	65-74	Less than high school	Hispanic	Female	$10,000 to $12,499	Widowed	Metro	Northeast	Not working - retired	No	Yes, every year	$0	Yes, more likely	Yes, more likely	Protect myself and others	#NULL!	#NULL!	#NULL!	#NULL!	#NULL!	#NULL!	#NULL!	#NULL!	#NULL!	#NULL!	#NULL!		Yes	Somewhat effective	Yes, the full cost is paid	1.7264
1133	55-64	High school	White, Non-Hispanic	Female	$100,000 to $124,999	Married	Metro	South	Not working - disabled	Yes	Yes, every year	$0	No, no effect	No, no effect	Protect myself and others	#NULL!	#NULL!	#NULL!	#NULL!	#NULL!	#NULL!	#NULL!	#NULL!	#NULL!	#NULL!	#NULL!		Yes	Very effective	Yes, the full cost is paid	0.8539
1134	65-74	Bachelor_s degree or higher	White, Non-Hispanic	Male	$100,000 to $124,999	Married	Non-Metro	Midwest	Not working - retired	Yes	Yes, every year	$0	Yes, more likely	No, no effect	Protect myself and others	#NULL!	#NULL!	#NULL!	#NULL!	#NULL!	#NULL!	#NULL!	#NULL!	#NULL!	#NULL!	#NULL!		Yes	Somewhat effective	Yes, the full cost is paid	0.5553
1135	55-64	Bachelor_s degree or higher	White, Non-Hispanic	Female	$150,000 to $174,999	Married	Metro	Northeast	Working - as a paid employee	Yes	Yes, every year	$0	No, no effect	No, no effect	Protect myself and others	#NULL!	#NULL!	#NULL!	#NULL!	#NULL!	#NULL!	#NULL!	#NULL!	#NULL!	#NULL!	#NULL!		Yes	Very effective	Yes, the full cost is paid	0.6527
1136	75+	Bachelor_s degree or higher	White, Non-Hispanic	Male	$100,000 to $124,999	Married	Non-Metro	Midwest	Not working - retired	Yes	Yes, every year	$0	No, no effect	No, no effect	Protect myself	#NULL!	#NULL!	#NULL!	#NULL!	#NULL!	#NULL!	#NULL!	#NULL!	#NULL!	#NULL!	#NULL!		Yes	Very effective	Yes, the full cost is paid	0.5553
1137	45-54	Bachelor_s degree or higher	White, Non-Hispanic	Female	$175,000 or more	Married	Metro	Northeast	Working - as a paid employee	Yes	Yes, some years	Less than $30	No, no effect	No, no effect	Protect myself and others	No	Yes	No	No	No	No	No	Yes	No	No	No		Yes	It varies from season to season	Yes, but only part of the cost is paid	0.6921
1138	25-34	Bachelor_s degree or higher	Other, Non-Hispanic	Male	$12,500 to $14,999	Never married	Metro	West	Not working - looking for work	Yes	No, never	#NULL!	#NULL!	#NULL!	#NULL!	No	No	Yes	No	No	No	No	Yes	No	No	No		No	It varies from season to season	#NULL!	1.6105
1139	18-24	Less than high school	2+ Races, Non-Hispanic	Female	$35,000 to $39,999	Never married	Metro	West	Not working - looking for work	Yes	No, never	#NULL!	#NULL!	#NULL!	#NULL!	Yes	No	No	No	No	No	No	No	No	No	No		No	Don_t know	#NULL!	0.5855
1140	18-24	Some college	Other, Non-Hispanic	Male	$20,000 to $24,999	Never married	Metro	West	Working - as a paid employee	Yes	Yes, some years	Don_t know	Yes, more likely	No, less likely	Protect myself and others	No	No	No	No	No	No	No	Yes	No	No	No		Yes	Don_t know	Don_t know	1.9161
1141	65-74	Bachelor_s degree or higher	Other, Non-Hispanic	Female	$85,000 to $99,999	Married	Metro	West	Not working - retired	Yes	Yes, some years	$0	No, no effect	Refused	Protect myself	No	Yes	No	No	No	No	No	No	No	Yes	No	My last vaccine was in nursing school, n every time I got it I ended up in the infirmary!	Yes	It varies from season to season	Don_t know	1.1021
1142	35-44	Some college	2+ Races, Non-Hispanic	Male	$50,000 to $59,999	Married	Metro	South	Working - as a paid employee	Yes	No, never	#NULL!	#NULL!	#NULL!	#NULL!	No	Yes	No	No	Yes	No	No	No	No	No	No		Yes	It varies from season to season	Yes, the full cost is paid	0.3325
1143	18-24	High school	Black, Non-Hispanic	Male	$60,000 to $74,999	Never married	Metro	Northeast	Not working - looking for work	Yes	Yes, every year	$0	Yes, more likely	Yes, more likely	Protect myself and others	#NULL!	#NULL!	#NULL!	#NULL!	#NULL!	#NULL!	#NULL!	#NULL!	#NULL!	#NULL!	#NULL!		Yes	Somewhat effective	Yes, the full cost is paid	1.6982
1144	25-34	Some college	Other, Non-Hispanic	Female	$25,000 to $29,999	Married	Metro	West	Not working - other	Yes	Yes, some years	$0	Yes, more likely	Yes, more likely	Protect myself and others	No	No	No	No	No	No	No	No	No	No	Yes		Yes	Somewhat effective	Yes, the full cost is paid	2.0106
1145	55-64	High school	White, Non-Hispanic	Male	$60,000 to $74,999	Married	Metro	West	Working - as a paid employee	Yes	Yes, every year	$0	Yes, more likely	Yes, more likely	Protect myself and others	#NULL!	#NULL!	#NULL!	#NULL!	#NULL!	#NULL!	#NULL!	#NULL!	#NULL!	#NULL!	#NULL!		Yes	Very effective	Don_t know	0.6944
1146	55-64	Some college	White, Non-Hispanic	Male	$60,000 to $74,999	Married	Non-Metro	Northeast	Not working - retired	Yes	Yes, every year	Less than $30	No, less likely	Yes, more likely	Protect myself and others	#NULL!	#NULL!	#NULL!	#NULL!	#NULL!	#NULL!	#NULL!	#NULL!	#NULL!	#NULL!	#NULL!		Yes	Somewhat effective	Yes, but only part of the cost is paid	0.5281
1147	55-64	Some college	Black, Non-Hispanic	Female	$60,000 to $74,999	Separated	Metro	South	Working - as a paid employee	Yes	Yes, some years	$0	Yes, more likely	No, no effect	Protect myself and others	Yes	No	No	No	Yes	No	Yes	Yes	No	No	No		Yes	Somewhat effective	Yes, the full cost is paid	1.0533
1148	45-54	High school	White, Non-Hispanic	Male	$35,000 to $39,999	Divorced	Metro	Midwest	Not working - disabled	No	Yes, every year	$0	No, no effect	No, no effect	Protect myself	#NULL!	#NULL!	#NULL!	#NULL!	#NULL!	#NULL!	#NULL!	#NULL!	#NULL!	#NULL!	#NULL!		Yes	Very effective	Yes, the full cost is paid	1.1534
1149	75+	Some college	White, Non-Hispanic	Female	$35,000 to $39,999	Widowed	Metro	South	Not working - other	No	Yes, some years	$0	No, no effect	No, no effect	Protect myself	No	No	No	No	No	No	No	No	No	Yes	No	read that vaccine is not necessary	Yes	Don_t know	Yes, the full cost is paid	1.1216
1150	65-74	Some college	White, Non-Hispanic	Male	$15,000 to $19,999	Divorced	Metro	West	Not working - retired	No	No, never	#NULL!	#NULL!	#NULL!	#NULL!	No	No	Yes	No	No	No	No	No	No	No	No		Yes	Somewhat effective	Don_t know	0.7996
1151	35-44	Some college	Black, Non-Hispanic	Male	$35,000 to $39,999	Never married	Metro	Northeast	Working - as a paid employee	Yes	No, never	#NULL!	#NULL!	#NULL!	#NULL!	Yes	No	No	No	Yes	No	No	No	No	No	No		Yes	Very effective	Don_t know	1.2529
1152	18-24	High school	White, Non-Hispanic	Female	$50,000 to $59,999	Never married	Metro	Midwest	Working - as a paid employee	Yes	No, never	#NULL!	#NULL!	#NULL!	#NULL!	No	No	No	No	No	No	Yes	No	No	No	No		Yes	Don_t know	Don_t know	1.2349
1153	45-54	Some college	White, Non-Hispanic	Female	$7,500 to $9,999	Never married	Metro	Midwest	Not working - disabled	No	No, never	#NULL!	#NULL!	#NULL!	#NULL!	No	No	No	No	No	Yes	No	No	No	No	No		Yes	It varies from season to season	No	1.0426
1154	35-44	Bachelor_s degree or higher	2+ Races, Non-Hispanic	Female	$125,000 to $149,999	Divorced	Metro	South	Working - as a paid employee	Yes	No, never	#NULL!	#NULL!	#NULL!	#NULL!	No	No	Yes	No	No	No	No	No	No	No	No		Yes	Somewhat effective	Yes, the full cost is paid	0.3514
1155	25-34	High school	White, Non-Hispanic	Male	$35,000 to $39,999	Never married	Metro	West	Not working - looking for work	Yes	Yes, every year	$0	No, less likely	No, no effect	Protect myself and others	#NULL!	#NULL!	#NULL!	#NULL!	#NULL!	#NULL!	#NULL!	#NULL!	#NULL!	#NULL!	#NULL!		Yes	Somewhat effective	Yes, the full cost is paid	1.2998
1156	45-54	High school	White, Non-Hispanic	Female	$100,000 to $124,999	Married	Metro	Midwest	Working - self-employed	Yes	No, never	#NULL!	#NULL!	#NULL!	#NULL!	No	No	No	No	Yes	No	Yes	No	No	Yes	No	i don_t believe in vaccines	Yes	Not effective	Don_t know	0.9014
1157	75+	High school	White, Non-Hispanic	Male	$60,000 to $74,999	Married	Metro	Northeast	Working - as a paid employee	No	No, never	#NULL!	#NULL!	#NULL!	#NULL!	No	No	No	No	Yes	No	Yes	Yes	No	No	No		Yes	Somewhat effective	Don_t know	0.8981
1158	55-64	High school	White, Non-Hispanic	Male	Less than $5,000	Married	Non-Metro	Midwest	Not working - looking for work	No	No, never	#NULL!	#NULL!	#NULL!	#NULL!	No	No	No	Yes	No	No	No	No	No	No	No		Yes	It varies from season to season	Don_t know	0.9181
1159	45-54	Some college	Black, Non-Hispanic	Female	$125,000 to $149,999	Married	Metro	South	Working - as a paid employee	Yes	No, never	#NULL!	#NULL!	#NULL!	#NULL!	No	No	No	No	No	No	Yes	No	No	No	No		Yes	It varies from season to season	Yes, the full cost is paid	1.1959
1160	65-74	High school	White, Non-Hispanic	Male	$50,000 to $59,999	Married	Metro	Midwest	Not working - retired	No	Yes, every year	$0	Yes, more likely	Yes, more likely	Protect myself	#NULL!	#NULL!	#NULL!	#NULL!	#NULL!	#NULL!	#NULL!	#NULL!	#NULL!	#NULL!	#NULL!		Yes	Somewhat effective	Yes, the full cost is paid	0.958
1161	65-74	Some college	White, Non-Hispanic	Female	$12,500 to $14,999	Divorced	Non-Metro	Midwest	Not working - retired	No	No, never	#NULL!	#NULL!	#NULL!	#NULL!	No	Yes	Yes	No	No	No	Yes	No	No	No	No		Yes	It varies from season to season	Don_t know	0.8887
1162	55-64	Some college	Hispanic	Male	$10,000 to $12,499	Married	Metro	South	Not working - disabled	Yes	Yes, every year	$0	No, no effect	No, no effect	Protect myself	#NULL!	#NULL!	#NULL!	#NULL!	#NULL!	#NULL!	#NULL!	#NULL!	#NULL!	#NULL!	#NULL!		Yes	Somewhat effective	Yes, the full cost is paid	0.7978
1163	65-74	High school	White, Non-Hispanic	Male	$50,000 to $59,999	Married	Metro	Northeast	Working - as a paid employee	Yes	No, never	#NULL!	#NULL!	#NULL!	#NULL!	No	No	No	No	No	No	No	No	Yes	No	No		Yes	It varies from season to season	Don_t know	0.6195
1164	55-64	Bachelor_s degree or higher	White, Non-Hispanic	Male	$175,000 or more	Married	Metro	Northeast	Working - as a paid employee	Yes	Yes, every year	Less than $30	No, no effect	No, no effect	Protect myself	#NULL!	#NULL!	#NULL!	#NULL!	#NULL!	#NULL!	#NULL!	#NULL!	#NULL!	#NULL!	#NULL!		Yes	Somewhat effective	Yes, the full cost is paid	0.657
1165	25-34	Less than high school	White, Non-Hispanic	Female	$60,000 to $74,999	Never married	Metro	South	Working - as a paid employee	Yes	No, never	#NULL!	#NULL!	#NULL!	#NULL!	No	No	No	No	No	No	No	Yes	No	No	No		No	Don_t know	#NULL!	1.7058
1166	75+	Bachelor_s degree or higher	White, Non-Hispanic	Male	$50,000 to $59,999	Married	Metro	South	Not working - retired	Yes	Yes, every year	$0	Yes, more likely	Yes, more likely	Protect myself and others	#NULL!	#NULL!	#NULL!	#NULL!	#NULL!	#NULL!	#NULL!	#NULL!	#NULL!	#NULL!	#NULL!		Yes	Somewhat effective	Yes, the full cost is paid	0.5436
1167	35-44	Less than high school	Hispanic	Male	$12,500 to $14,999	Never married	Metro	Midwest	Not working - looking for work	No	No, never	#NULL!	#NULL!	#NULL!	#NULL!	No	No	No	No	No	No	No	No	No	Yes	No	don_t have the money or health care	No	Don_t know	#NULL!	2.3572
1168	35-44	Bachelor_s degree or higher	White, Non-Hispanic	Female	$100,000 to $124,999	Married	Metro	Midwest	Working - self-employed	Yes	Yes, every year	$0	No, no effect	Yes, more likely	Protect myself	#NULL!	#NULL!	#NULL!	#NULL!	#NULL!	#NULL!	#NULL!	#NULL!	#NULL!	#NULL!	#NULL!		Yes	Somewhat effective	Yes, the full cost is paid	0.9871
1169	55-64	Bachelor_s degree or higher	White, Non-Hispanic	Female	$175,000 or more	Married	Metro	Midwest	Working - self-employed	Yes	Yes, every year	Less than $30	No, no effect	No, no effect	Protect myself	#NULL!	#NULL!	#NULL!	#NULL!	#NULL!	#NULL!	#NULL!	#NULL!	#NULL!	#NULL!	#NULL!		Yes	Somewhat effective	Yes, but only part of the cost is paid	0.6962
1170	55-64	Bachelor_s degree or higher	White, Non-Hispanic	Female	$50,000 to $59,999	Divorced	Metro	West	Not working - retired	Yes	Yes, every year	$0	No, no effect	No, no effect	Protect myself and others	#NULL!	#NULL!	#NULL!	#NULL!	#NULL!	#NULL!	#NULL!	#NULL!	#NULL!	#NULL!	#NULL!		Yes	Somewhat effective	Yes, the full cost is paid	0.5651
1171	25-34	Bachelor_s degree or higher	Hispanic	Male	$60,000 to $74,999	Never married	Metro	Northeast	Not working - looking for work	Yes	Yes, some years	Don_t know	No, less likely	Yes, more likely	Protect myself and others	Yes	No	No	Yes	No	No	No	No	No	No	No		Yes	Don_t know	Don_t know	1.3614
1172	55-64	High school	Black, Non-Hispanic	Female	$60,000 to $74,999	Married	Metro	Northeast	Not working - retired	No	Yes, every year	$0	Yes, more likely	Yes, more likely	Protect myself	#NULL!	#NULL!	#NULL!	#NULL!	#NULL!	#NULL!	#NULL!	#NULL!	#NULL!	#NULL!	#NULL!		Yes	Somewhat effective	Yes, the full cost is paid	1.3795
1173	35-44	High school	White, Non-Hispanic	Female	$30,000 to $34,999	Married	Non-Metro	West	Working - self-employed	No	Yes, every year	$0	No, no effect	No, no effect	Protect myself and others	#NULL!	#NULL!	#NULL!	#NULL!	#NULL!	#NULL!	#NULL!	#NULL!	#NULL!	#NULL!	#NULL!		Yes	Very effective	Yes, the full cost is paid	2.5606
1174	55-64	High school	White, Non-Hispanic	Male	$85,000 to $99,999	Divorced	Metro	West	Working - as a paid employee	Yes	Yes, some years	$0	Yes, more likely	No, no effect	Protect myself and others	No	No	No	No	No	No	No	Yes	No	No	No		Yes	It varies from season to season	Yes, the full cost is paid	0.7884
1175	45-54	Bachelor_s degree or higher	White, Non-Hispanic	Male	$85,000 to $99,999	Married	Metro	South	Not working - retired	Yes	Yes, every year	$0	Yes, more likely	Yes, more likely	Protect myself and others	#NULL!	#NULL!	#NULL!	#NULL!	#NULL!	#NULL!	#NULL!	#NULL!	#NULL!	#NULL!	#NULL!		Yes	Somewhat effective	Yes, the full cost is paid	0.7039
1176	18-24	High school	White, Non-Hispanic	Male	$60,000 to $74,999	Never married	Non-Metro	Northeast	Working - as a paid employee	Yes	No, never	#NULL!	#NULL!	#NULL!	#NULL!	No	Yes	No	No	No	No	No	No	No	No	No		Yes	It varies from season to season	Don_t know	1.096
1177	18-24	High school	Black, Non-Hispanic	Female	$35,000 to $39,999	Never married	Metro	South	Working - as a paid employee	Yes	No, never	#NULL!	#NULL!	#NULL!	#NULL!	No	No	No	No	No	No	No	Yes	No	No	No		Yes	Not effective	Don_t know	1.7749
1178	25-34	Bachelor_s degree or higher	White, Non-Hispanic	Male	$75,000 to $84,999	Never married	Metro	South	Working - as a paid employee	Yes	No, never	#NULL!	#NULL!	#NULL!	#NULL!	No	No	No	No	No	No	Yes	Yes	No	No	No		Yes	It varies from season to season	Don_t know	1.2481
1179	65-74	Some college	White, Non-Hispanic	Female	$10,000 to $12,499	Divorced	Metro	South	Not working - retired	No	No, never	#NULL!	#NULL!	#NULL!	#NULL!	No	No	No	No	Yes	No	No	No	No	No	No		Yes	Not effective	Don_t know	0.9877
1180	45-54	Bachelor_s degree or higher	White, Non-Hispanic	Male	$60,000 to $74,999	Married	Metro	Midwest	Working - as a paid employee	Yes	No, never	#NULL!	#NULL!	#NULL!	#NULL!	No	No	No	No	Yes	No	No	No	No	No	No		Yes	Don_t know	Don_t know	0.6172
1181	45-54	Bachelor_s degree or higher	2+ Races, Non-Hispanic	Female	$150,000 to $174,999	Married	Metro	South	Not working - retired	Yes	Yes, every year	$0	No, no effect	Yes, more likely	Protect myself and others	#NULL!	#NULL!	#NULL!	#NULL!	#NULL!	#NULL!	#NULL!	#NULL!	#NULL!	#NULL!	#NULL!		Yes	It varies from season to season	Yes, the full cost is paid	0.2705
1182	65-74	Bachelor_s degree or higher	White, Non-Hispanic	Male	$100,000 to $124,999	Never married	Metro	Midwest	Not working - retired	No	Yes, some years	Less than $30	No, no effect	No, no effect	Protect myself	No	No	Yes	No	No	No	No	No	No	No	No		Yes	Somewhat effective	Yes, the full cost is paid	0.8908
1183	75+	Some college	White, Non-Hispanic	Male	$100,000 to $124,999	Married	Non-Metro	Midwest	Not working - retired	Yes	Yes, every year	$0	No, no effect	No, no effect	Protect myself and others	#NULL!	#NULL!	#NULL!	#NULL!	#NULL!	#NULL!	#NULL!	#NULL!	#NULL!	#NULL!	#NULL!		Yes	Very effective	Yes, the full cost is paid	0.6607
1184	35-44	Some college	White, Non-Hispanic	Male	$75,000 to $84,999	Married	Non-Metro	West	Working - self-employed	Yes	No, never	#NULL!	#NULL!	#NULL!	#NULL!	No	No	No	No	Yes	No	No	No	No	No	No		Yes	Don_t know	Don_t know	1.6712
1185	55-64	High school	White, Non-Hispanic	Female	$35,000 to $39,999	Divorced	Metro	South	Not working - disabled	No	Yes, every year	$0	No, no effect	No, no effect	Protect myself and others	#NULL!	#NULL!	#NULL!	#NULL!	#NULL!	#NULL!	#NULL!	#NULL!	#NULL!	#NULL!	#NULL!		Yes	It varies from season to season	Yes, the full cost is paid	1.1511
1187	35-44	High school	White, Non-Hispanic	Male	$20,000 to $24,999	Divorced	Metro	Midwest	Working - as a paid employee	No	No, never	#NULL!	#NULL!	#NULL!	#NULL!	No	No	No	No	No	No	Yes	Yes	No	No	No		Yes	Somewhat effective	Don_t know	1.2919
1188	75+	Some college	White, Non-Hispanic	Female	$50,000 to $59,999	Married	Metro	West	Not working - retired	Yes	Yes, every year	Don_t know	No, no effect	No, no effect	Protect myself and others	#NULL!	#NULL!	#NULL!	#NULL!	#NULL!	#NULL!	#NULL!	#NULL!	#NULL!	#NULL!	#NULL!		Yes	Somewhat effective	Don_t know	0.6723
1189	35-44	Bachelor_s degree or higher	White, Non-Hispanic	Female	$50,000 to $59,999	Divorced	Metro	South	Working - as a paid employee	Yes	Yes, every year	$0	Yes, more likely	No, no effect	Protect myself	#NULL!	#NULL!	#NULL!	#NULL!	#NULL!	#NULL!	#NULL!	#NULL!	#NULL!	#NULL!	#NULL!		Yes	Very effective	Yes, the full cost is paid	0.8733
1190	55-64	Bachelor_s degree or higher	White, Non-Hispanic	Male	$100,000 to $124,999	Married	Metro	Midwest	Working - as a paid employee	No	No, never	#NULL!	#NULL!	#NULL!	#NULL!	No	No	No	No	No	No	No	No	Yes	No	No		Yes	Don_t know	Don_t know	1.016
1191	45-54	Bachelor_s degree or higher	White, Non-Hispanic	Female	$175,000 or more	Married	Metro	West	Not working - on temporary layoff from a job	Yes	Yes, some years	Less than $30	Yes, more likely	Yes, more likely	Protect myself	No	No	No	No	No	No	Yes	Yes	No	No	No		Yes	It varies from season to season	Don_t know	0.6802
1192	65-74	High school	White, Non-Hispanic	Female	$50,000 to $59,999	Married	Non-Metro	Midwest	Working - as a paid employee	Yes	No, never	#NULL!	#NULL!	#NULL!	#NULL!	No	No	No	Yes	No	No	No	No	No	No	No		Yes	Somewhat effective	Don_t know	0.6767
1193	45-54	High school	Black, Non-Hispanic	Female	$5,000 to $7,499	Divorced	Non-Metro	South	Not working - other	Yes	No, never	#NULL!	#NULL!	#NULL!	#NULL!	No	Yes	No	No	No	No	Yes	No	No	No	No		Yes	Somewhat effective	Yes, the full cost is paid	0.9831
1194	45-54	Bachelor_s degree or higher	White, Non-Hispanic	Female	$50,000 to $59,999	Married	Metro	Northeast	Working - as a paid employee	Yes	No, never	#NULL!	#NULL!	#NULL!	#NULL!	No	No	No	No	Yes	No	No	Yes	No	No	No		Yes	Somewhat effective	Yes, the full cost is paid	0.6096
1195	65-74	Bachelor_s degree or higher	White, Non-Hispanic	Male	$125,000 to $149,999	Married	Metro	West	Not working - retired	Yes	Yes, some years	$0	No, less likely	No, less likely	Protect myself	No	No	Yes	No	No	No	No	No	No	No	No		Yes	Somewhat effective	Yes, the full cost is paid	0.5662
1196	18-24	High school	White, Non-Hispanic	Male	$100,000 to $124,999	Never married	Metro	West	Working - as a paid employee	Yes	Yes, some years	$0	Yes, more likely	No, no effect	Protect myself and others	No	No	No	Yes	No	No	No	Yes	No	No	No		Yes	Very effective	Don_t know	1.398
1197	55-64	Bachelor_s degree or higher	White, Non-Hispanic	Male	$125,000 to $149,999	Married	Metro	South	Working - as a paid employee	Yes	No, never	#NULL!	#NULL!	#NULL!	#NULL!	No	Yes	Yes	No	Yes	No	No	No	No	No	No		Yes	Somewhat effective	Yes, the full cost is paid	0.7039
1198	35-44	Bachelor_s degree or higher	White, Non-Hispanic	Female	$85,000 to $99,999	Married	Metro	South	Working - as a paid employee	Yes	Yes, every year	$0	No, no effect	No, no effect	Protect others	#NULL!	#NULL!	#NULL!	#NULL!	#NULL!	#NULL!	#NULL!	#NULL!	#NULL!	#NULL!	#NULL!		Yes	Very effective	Yes, the full cost is paid	0.9915
1199	55-64	Bachelor_s degree or higher	White, Non-Hispanic	Male	$100,000 to $124,999	Married	Metro	Midwest	Working - as a paid employee	Yes	Yes, every year	$0	No, no effect	No, no effect	Protect myself and others	#NULL!	#NULL!	#NULL!	#NULL!	#NULL!	#NULL!	#NULL!	#NULL!	#NULL!	#NULL!	#NULL!		Yes	Not effective	Yes, the full cost is paid	0.6144
1200	25-34	High school	White, Non-Hispanic	Male	$50,000 to $59,999	Married	Metro	South	Working - as a paid employee	Yes	No, never	#NULL!	#NULL!	#NULL!	#NULL!	No	Yes	No	No	Yes	No	No	No	No	No	No		Yes	Somewhat effective	Yes, the full cost is paid	0.9628
1201	55-64	High school	White, Non-Hispanic	Male	Less than $5,000	Divorced	Metro	Midwest	Not working - disabled	No	No, never	#NULL!	#NULL!	#NULL!	#NULL!	No	No	No	No	No	No	No	No	No	Yes	No	every time i get a bullshit shot like that i end up getting the shit	Yes	Don_t know	Don_t know	1.0158
1202	35-44	Bachelor_s degree or higher	White, Non-Hispanic	Female	$15,000 to $19,999	Never married	Non-Metro	Midwest	Working - as a paid employee	No	No, never	#NULL!	#NULL!	#NULL!	#NULL!	No	No	Yes	No	No	No	No	No	No	No	No		Yes	Somewhat effective	No	1.0591
1203	55-64	High school	White, Non-Hispanic	Male	$12,500 to $14,999	Married	Metro	West	Not working - disabled	Yes	Yes, every year	Less than $30	No, no effect	Yes, more likely	Protect myself and others	#NULL!	#NULL!	#NULL!	#NULL!	#NULL!	#NULL!	#NULL!	#NULL!	#NULL!	#NULL!	#NULL!		Yes	It varies from season to season	Yes, but only part of the cost is paid	0.6456
1204	45-54	High school	White, Non-Hispanic	Male	$75,000 to $84,999	Never married	Non-Metro	Midwest	Working - as a paid employee	Yes	No, never	#NULL!	#NULL!	#NULL!	#NULL!	No	No	No	No	No	No	Yes	No	No	No	No		Yes	Don_t know	Don_t know	0.7734
1205	65-74	Some college	2+ Races, Non-Hispanic	Female	$75,000 to $84,999	Married	Metro	West	Not working - retired	Yes	Yes, every year	$0	Yes, more likely	No, no effect	Protect myself and others	#NULL!	#NULL!	#NULL!	#NULL!	#NULL!	#NULL!	#NULL!	#NULL!	#NULL!	#NULL!	#NULL!		Yes	Somewhat effective	Yes, the full cost is paid	0.2705
1206	55-64	High school	Hispanic	Male	$60,000 to $74,999	Separated	Metro	West	Not working - disabled	No	Yes, some years	Less than $30	No, no effect	No, no effect	Protect myself	No	Yes	No	No	No	No	No	No	No	No	No		Yes	Somewhat effective	Yes, the full cost is paid	1.3358
1207	18-24	High school	White, Non-Hispanic	Male	$25,000 to $29,999	Never married	Metro	Northeast	Not working - other	Yes	No, never	#NULL!	#NULL!	#NULL!	#NULL!	No	Yes	No	No	No	No	No	No	No	Yes	No	I WOULD RATHER GET THE FLU AND BUILD ANTIBODIES TO IT NATURALY	Yes	Not effective	Yes, the full cost is paid	1.3225
1208	18-24	Bachelor_s degree or higher	White, Non-Hispanic	Male	$50,000 to $59,999	Separated	Metro	Northeast	Working - self-employed	No	No, never	#NULL!	#NULL!	#NULL!	#NULL!	No	No	No	No	No	No	No	No	Yes	No	No		Yes	Somewhat effective	Yes, but only part of the cost is paid	1.4875
1209	25-34	Less than high school	White, Non-Hispanic	Female	$85,000 to $99,999	Never married	Non-Metro	Northeast	Not working - looking for work	Yes	No, never	#NULL!	#NULL!	#NULL!	#NULL!	No	No	No	No	No	No	No	Yes	No	No	No		No	Don_t know	#NULL!	1.3594
1210	35-44	High school	White, Non-Hispanic	Male	$100,000 to $124,999	Married	Metro	Northeast	Working - as a paid employee	Yes	Yes, some years	$0	Yes, more likely	Yes, more likely	Protect myself	No	No	No	No	No	No	No	Yes	No	No	No		Yes	Somewhat effective	Yes, the full cost is paid	1.0203
1211	65-74	High school	White, Non-Hispanic	Female	$25,000 to $29,999	Divorced	Non-Metro	Midwest	Not working - retired	Yes	Yes, some years	$0	No, no effect	No, no effect	Protect myself	No	Yes	No	No	No	No	No	No	No	No	No		Yes	Somewhat effective	Yes, the full cost is paid	0.7144
1212	55-64	High school	White, Non-Hispanic	Male	$35,000 to $39,999	Divorced	Non-Metro	Midwest	Working - as a paid employee	Yes	No, never	#NULL!	#NULL!	#NULL!	#NULL!	No	No	Yes	No	No	Yes	No	No	No	No	No		Yes	It varies from season to season	Yes, the full cost is paid	0.6305
1213	75+	Less than high school	Hispanic	Male	$35,000 to $39,999	Divorced	Metro	South	Not working - retired	No	Yes, every year	$0	No, no effect	Yes, more likely	Protect myself and others	#NULL!	#NULL!	#NULL!	#NULL!	#NULL!	#NULL!	#NULL!	#NULL!	#NULL!	#NULL!	#NULL!		Yes	Very effective	Yes, the full cost is paid	1.8535
1214	55-64	Bachelor_s degree or higher	White, Non-Hispanic	Male	$60,000 to $74,999	Married	Metro	Midwest	Working - as a paid employee	Yes	Yes, every year	$0	No, no effect	No, no effect	Protect myself	#NULL!	#NULL!	#NULL!	#NULL!	#NULL!	#NULL!	#NULL!	#NULL!	#NULL!	#NULL!	#NULL!		Yes	Somewhat effective	Yes, the full cost is paid	0.5412
1215	55-64	Bachelor_s degree or higher	White, Non-Hispanic	Female	$150,000 to $174,999	Married	Metro	Midwest	Working - as a paid employee	Yes	Yes, some years	$0	No, no effect	No, no effect	Protect myself and others	No	No	Yes	No	Yes	No	No	No	No	No	No		Yes	It varies from season to season	Don_t know	0.6962
1216	55-64	Bachelor_s degree or higher	White, Non-Hispanic	Female	$175,000 or more	Married	Metro	South	Working - self-employed	Yes	Yes, every year	$0	No, no effect	No, no effect	Protect myself and others	#NULL!	#NULL!	#NULL!	#NULL!	#NULL!	#NULL!	#NULL!	#NULL!	#NULL!	#NULL!	#NULL!		Yes	Very effective	Yes, the full cost is paid	0.7416
1217	55-64	Bachelor_s degree or higher	White, Non-Hispanic	Male	$10,000 to $12,499	Divorced	Metro	Midwest	Working - as a paid employee	No	No, never	#NULL!	#NULL!	#NULL!	#NULL!	No	No	No	No	No	No	Yes	No	No	No	No		Yes	Don_t know	Don_t know	0.8319
1219	35-44	High school	White, Non-Hispanic	Male	$60,000 to $74,999	Married	Metro	South	Working - as a paid employee	Yes	No, never	#NULL!	#NULL!	#NULL!	#NULL!	No	No	Yes	No	No	No	No	No	No	No	No		Yes	Don_t know	Yes, the full cost is paid	0.9628
1220	45-54	Bachelor_s degree or higher	White, Non-Hispanic	Female	$100,000 to $124,999	Married	Metro	Northeast	Working - as a paid employee	Yes	Yes, every year	$0	Yes, more likely	Yes, more likely	Protect myself and others	#NULL!	#NULL!	#NULL!	#NULL!	#NULL!	#NULL!	#NULL!	#NULL!	#NULL!	#NULL!	#NULL!		Yes	Somewhat effective	Yes, the full cost is paid	0.6921
1221	25-34	Some college	White, Non-Hispanic	Female	$40,000 to $49,999	Married	Non-Metro	Northeast	Working - as a paid employee	Yes	Yes, some years	Less than $30	No, no effect	No, no effect	Protect myself and others	No	No	No	No	No	No	No	Yes	No	No	No		Yes	It varies from season to season	Yes, but only part of the cost is paid	0.8956
1222	45-54	High school	White, Non-Hispanic	Male	$60,000 to $74,999	Married	Metro	Midwest	Working - as a paid employee	Yes	No, never	#NULL!	#NULL!	#NULL!	#NULL!	No	No	No	No	No	No	No	No	No	Yes	No	Dr did not suggest	Yes	Don_t know	No	0.7537
1223	45-54	High school	Black, Non-Hispanic	Male	$100,000 to $124,999	Divorced	Non-Metro	Midwest	Working - as a paid employee	Yes	Yes, some years	$0	No, no effect	No, no effect	Protect myself and others	Yes	Yes	No	No	Yes	No	No	No	No	No	No		Yes	Somewhat effective	Yes, the full cost is paid	1.0483
1224	55-64	Some college	White, Non-Hispanic	Male	$75,000 to $84,999	Divorced	Metro	South	Working - as a paid employee	Yes	No, never	#NULL!	#NULL!	#NULL!	#NULL!	No	No	Yes	No	No	No	No	No	No	No	No		Yes	Somewhat effective	Yes, the full cost is paid	0.7343
1225	25-34	Bachelor_s degree or higher	2+ Races, Non-Hispanic	Male	$75,000 to $84,999	Never married	Metro	Northeast	Working - as a paid employee	Yes	Yes, some years	$0	Yes, more likely	No, less likely	Protect myself	No	No	No	No	No	No	Yes	Yes	No	No	No		Yes	Very effective	Yes, the full cost is paid	0.4129
1226	45-54	Some college	White, Non-Hispanic	Male	$50,000 to $59,999	Divorced	Non-Metro	West	Working - as a paid employee	Yes	Yes, some years	Less than $30	No, no effect	No, no effect	Protect myself and others	No	Yes	No	No	No	No	Yes	No	No	No	No		Yes	Not effective	No	1.1574
1227	18-24	Some college	White, Non-Hispanic	Female	$100,000 to $124,999	Never married	Metro	Northeast	Working - as a paid employee	Yes	No, never	#NULL!	#NULL!	#NULL!	#NULL!	No	Yes	Yes	No	Yes	No	Yes	Yes	No	Yes	No	Vaccine_s make you sick	Yes	Not effective	Don_t know	1.2807
1228	45-54	Some college	Black, Non-Hispanic	Female	$40,000 to $49,999	Divorced	Metro	South	Not working - looking for work	Yes	No, never	#NULL!	#NULL!	#NULL!	#NULL!	Yes	Yes	Yes	No	No	No	No	No	No	No	No		Yes	It varies from season to season	Don_t know	1.1119
1229	65-74	Less than high school	Black, Non-Hispanic	Male	$12,500 to $14,999	Married	Metro	Northeast	Not working - other	Yes	Yes, every year	$0	Yes, more likely	No, no effect	Protect myself and others	#NULL!	#NULL!	#NULL!	#NULL!	#NULL!	#NULL!	#NULL!	#NULL!	#NULL!	#NULL!	#NULL!		Yes	Don_t know	Don_t know	1.0736
1230	65-74	Bachelor_s degree or higher	White, Non-Hispanic	Male	$100,000 to $124,999	Divorced	Metro	West	Not working - retired	Yes	Yes, every year	$0	No, no effect	No, no effect	Protect myself and others	#NULL!	#NULL!	#NULL!	#NULL!	#NULL!	#NULL!	#NULL!	#NULL!	#NULL!	#NULL!	#NULL!		Yes	Somewhat effective	Yes, the full cost is paid	0.5662
1231	65-74	Bachelor_s degree or higher	White, Non-Hispanic	Male	$175,000 or more	Married	Metro	Northeast	Not working - retired	Yes	Yes, every year	$0	No, no effect	No, no effect	Protect myself and others	#NULL!	#NULL!	#NULL!	#NULL!	#NULL!	#NULL!	#NULL!	#NULL!	#NULL!	#NULL!	#NULL!		Yes	Somewhat effective	Yes, the full cost is paid	0.576
1232	45-54	Bachelor_s degree or higher	White, Non-Hispanic	Female	$175,000 or more	Married	Metro	West	Working - self-employed	Yes	Yes, every year	$0	No, no effect	No, no effect	Protect myself and others	#NULL!	#NULL!	#NULL!	#NULL!	#NULL!	#NULL!	#NULL!	#NULL!	#NULL!	#NULL!	#NULL!		Yes	Somewhat effective	Yes, the full cost is paid	0.6802
1233	55-64	Some college	White, Non-Hispanic	Female	$10,000 to $12,499	Never married	Metro	West	Working - as a paid employee	No	No, never	#NULL!	#NULL!	#NULL!	#NULL!	No	Yes	No	No	No	No	No	Yes	No	No	No		Yes	It varies from season to season	Don_t know	0.9607
1234	55-64	Bachelor_s degree or higher	White, Non-Hispanic	Male	$175,000 or more	Married	Metro	South	Working - as a paid employee	Yes	No, never	#NULL!	#NULL!	#NULL!	#NULL!	No	No	Yes	No	No	No	No	No	No	No	No		Yes	Somewhat effective	Don_t know	0.6172
1235	55-64	Some college	White, Non-Hispanic	Male	$85,000 to $99,999	Married	Non-Metro	Northeast	Working - as a paid employee	Yes	No, never	#NULL!	#NULL!	#NULL!	#NULL!	No	Yes	No	No	Yes	No	No	No	No	Yes	No	it has zero efficacy	Yes	Not effective	Yes, the full cost is paid	0.5995
1236	55-64	Bachelor_s degree or higher	White, Non-Hispanic	Female	$20,000 to $24,999	Married	Metro	South	Not working - disabled	Yes	Yes, every year	$0	No, no effect	No, no effect	Protect myself	#NULL!	#NULL!	#NULL!	#NULL!	#NULL!	#NULL!	#NULL!	#NULL!	#NULL!	#NULL!	#NULL!		Yes	It varies from season to season	Yes, the full cost is paid	0.5727
1237	18-24	High school	Hispanic	Male	$60,000 to $74,999	Never married	Metro	West	Not working - looking for work	Yes	No, never	#NULL!	#NULL!	#NULL!	#NULL!	No	Yes	No	No	No	No	No	No	No	No	No		Yes	Not effective	Yes, the full cost is paid	1.6337
1238	55-64	High school	White, Non-Hispanic	Female	$25,000 to $29,999	Widowed	Metro	South	Working - as a paid employee	Yes	No, never	#NULL!	#NULL!	#NULL!	#NULL!	Yes	Yes	No	No	No	No	No	Yes	No	No	No		Yes	Somewhat effective	Don_t know	0.794
1239	45-54	Bachelor_s degree or higher	White, Non-Hispanic	Female	$175,000 or more	Married	Metro	Midwest	Working - as a paid employee	Yes	Yes, every year	$0	No, no effect	Yes, more likely	Protect myself and others	#NULL!	#NULL!	#NULL!	#NULL!	#NULL!	#NULL!	#NULL!	#NULL!	#NULL!	#NULL!	#NULL!		Yes	It varies from season to season	Yes, the full cost is paid	0.7383
1240	45-54	Bachelor_s degree or higher	Hispanic	Male	$150,000 to $174,999	Married	Metro	West	Not working - looking for work	Yes	Yes, some years	Don_t know	No, less likely	Yes, more likely	Protect myself and others	No	No	No	No	Yes	Yes	Yes	No	No	No	No		Yes	Somewhat effective	Don_t know	0.8568
1241	45-54	Bachelor_s degree or higher	White, Non-Hispanic	Male	$175,000 or more	Separated	Metro	West	Working - as a paid employee	No	No, never	#NULL!	#NULL!	#NULL!	#NULL!	No	No	No	No	No	No	No	Yes	No	No	No		No	It varies from season to season	#NULL!	0.9361
1242	45-54	Some college	White, Non-Hispanic	Female	$100,000 to $124,999	Married	Metro	Midwest	Working - as a paid employee	Yes	Yes, some years	$30 to $60	No, no effect	No, no effect	Protect myself and others	No	Yes	No	No	No	No	No	No	No	No	No		Yes	Somewhat effective	No	0.8783
1243	25-34	Less than high school	White, Non-Hispanic	Male	$50,000 to $59,999	Married	Non-Metro	Northeast	Working - as a paid employee	Yes	No, never	#NULL!	#NULL!	#NULL!	#NULL!	No	No	Yes	No	No	No	No	No	No	No	No		Yes	Very effective	Yes, the full cost is paid	1.5072
1244	55-64	Some college	White, Non-Hispanic	Female	$20,000 to $24,999	Widowed	Metro	West	Working - as a paid employee	No	No, never	#NULL!	#NULL!	#NULL!	#NULL!	No	No	No	No	No	Yes	No	No	No	No	No		Yes	It varies from season to season	Yes, but only part of the cost is paid	0.906
1245	45-54	Some college	White, Non-Hispanic	Male	$50,000 to $59,999	Separated	Metro	South	Not working - disabled	Yes	Yes, every year	$0	No, no effect	No, no effect	Protect myself	#NULL!	#NULL!	#NULL!	#NULL!	#NULL!	#NULL!	#NULL!	#NULL!	#NULL!	#NULL!	#NULL!		Yes	Somewhat effective	Yes, the full cost is paid	0.7376
1246	65-74	Bachelor_s degree or higher	White, Non-Hispanic	Female	$40,000 to $49,999	Married	Non-Metro	Midwest	Not working - retired	Yes	Yes, every year	$0	Yes, more likely	Yes, more likely	Protect myself and others	#NULL!	#NULL!	#NULL!	#NULL!	#NULL!	#NULL!	#NULL!	#NULL!	#NULL!	#NULL!	#NULL!		Yes	Somewhat effective	Yes, the full cost is paid	0.5851
1247	65-74	High school	White, Non-Hispanic	Female	$40,000 to $49,999	Widowed	Metro	West	Not working - retired	Yes	Yes, every year	$0	No, no effect	Yes, more likely	Protect myself and others	#NULL!	#NULL!	#NULL!	#NULL!	#NULL!	#NULL!	#NULL!	#NULL!	#NULL!	#NULL!	#NULL!		Yes	It varies from season to season	Yes, the full cost is paid	0.7283
1248	55-64	High school	Black, Non-Hispanic	Female	$150,000 to $174,999	Married	Metro	Northeast	Working - as a paid employee	Yes	No, never	#NULL!	#NULL!	#NULL!	#NULL!	No	No	Yes	No	No	No	No	No	No	No	No		Yes	Somewhat effective	Yes, the full cost is paid	1.1455
1249	65-74	Some college	2+ Races, Non-Hispanic	Female	$100,000 to $124,999	Married	Metro	Northeast	Not working - retired	Yes	No, never	#NULL!	#NULL!	#NULL!	#NULL!	No	No	No	No	No	Yes	No	No	No	No	No		Yes	Somewhat effective	Yes, the full cost is paid	0.2753
1250	75+	Some college	White, Non-Hispanic	Female	$85,000 to $99,999	Married	Metro	Midwest	Not working - retired	Yes	Yes, every year	$0	Yes, more likely	No, no effect	Protect myself and others	#NULL!	#NULL!	#NULL!	#NULL!	#NULL!	#NULL!	#NULL!	#NULL!	#NULL!	#NULL!	#NULL!		Yes	Somewhat effective	Yes, the full cost is paid	0.8283
1251	65-74	Bachelor_s degree or higher	White, Non-Hispanic	Female	$50,000 to $59,999	Married	Non-Metro	South	Not working - retired	Yes	No, never	#NULL!	#NULL!	#NULL!	#NULL!	No	Yes	No	No	No	No	No	No	No	Yes	No	Insurance would only cover if the shot was given at the doctor_s office, and the doctor_s office did not give the shot.	Yes	Somewhat effective	Yes, the full cost is paid	0.6026
1252	55-64	Some college	White, Non-Hispanic	Female	$40,000 to $49,999	Married	Non-Metro	South	Working - as a paid employee	Yes	Yes, every year	$0	No, no effect	No, no effect	Protect myself and others	#NULL!	#NULL!	#NULL!	#NULL!	#NULL!	#NULL!	#NULL!	#NULL!	#NULL!	#NULL!	#NULL!		Yes	Not effective	Don_t know	0.8025
1253	25-34	Some college	White, Non-Hispanic	Female	$100,000 to $124,999	Never married	Metro	Midwest	Not working - other	Yes	No, never	#NULL!	#NULL!	#NULL!	#NULL!	No	No	No	No	No	No	No	Yes	No	No	No		Yes	Somewhat effective	Don_t know	1.3661
1254	25-34	Bachelor_s degree or higher	White, Non-Hispanic	Female	$60,000 to $74,999	Married	Metro	Midwest	Working - as a paid employee	Yes	Yes, some years	$30 to $60	No, no effect	No, no effect	Protect myself and others	Yes	No	No	No	No	No	No	Yes	No	No	No		Yes	It varies from season to season	Don_t know	0.8694
1255	45-54	Some college	White, Non-Hispanic	Male	$60,000 to $74,999	Married	Non-Metro	Northeast	Working - self-employed	Yes	Yes, every year	Less than $30	No, no effect	No, no effect	Protect myself	#NULL!	#NULL!	#NULL!	#NULL!	#NULL!	#NULL!	#NULL!	#NULL!	#NULL!	#NULL!	#NULL!		Yes	Somewhat effective	Yes, but only part of the cost is paid	0.6023
1256	45-54	Less than high school	Hispanic	Female	$12,500 to $14,999	Divorced	Non-Metro	South	Working - as a paid employee	No	No, never	#NULL!	#NULL!	#NULL!	#NULL!	No	No	No	No	No	No	No	Yes	No	No	No		No	Don_t know	#NULL!	1.9186
1257	25-34	Some college	White, Non-Hispanic	Female	$25,000 to $29,999	Living with partner	Metro	South	Working - as a paid employee	No	No, never	#NULL!	#NULL!	#NULL!	#NULL!	No	No	No	No	No	No	No	Yes	No	No	No		No	Somewhat effective	#NULL!	1.5901
1258	45-54	Bachelor_s degree or higher	White, Non-Hispanic	Male	$85,000 to $99,999	Married	Metro	South	Working - as a paid employee	Yes	No, never	#NULL!	#NULL!	#NULL!	#NULL!	No	No	No	No	No	No	No	No	No	Yes	No	the vaccine is contraindicated for me	Yes	Somewhat effective	Yes, the full cost is paid	0.7039
1259	65-74	Less than high school	White, Non-Hispanic	Male	$12,500 to $14,999	Divorced	Metro	Northeast	Not working - disabled	No	No, never	#NULL!	#NULL!	#NULL!	#NULL!	No	No	No	No	No	No	Yes	No	No	No	No		Yes	Don_t know	Don_t know	1.1482
1260	55-64	Some college	White, Non-Hispanic	Male	$40,000 to $49,999	Married	Non-Metro	South	Not working - retired	Yes	Yes, every year	$0	Yes, more likely	No, no effect	Protect myself and others	#NULL!	#NULL!	#NULL!	#NULL!	#NULL!	#NULL!	#NULL!	#NULL!	#NULL!	#NULL!	#NULL!		Yes	Somewhat effective	Yes, the full cost is paid	0.6679
1261	35-44	Some college	White, Non-Hispanic	Female	$50,000 to $59,999	Married	Non-Metro	Midwest	Working - as a paid employee	Yes	Yes, some years	$0	Yes, more likely	No, no effect	Protect myself and others	No	No	No	No	No	No	No	Yes	No	No	No		Yes	It varies from season to season	Yes, the full cost is paid	0.9349
1262	25-34	High school	Other, Non-Hispanic	Female	$35,000 to $39,999	Married	Metro	South	Working - as a paid employee	Yes	No, never	#NULL!	#NULL!	#NULL!	#NULL!	No	No	No	No	No	No	Yes	No	No	No	No		Yes	Not effective	Don_t know	2.2495
1263	18-24	High school	Hispanic	Male	$40,000 to $49,999	Never married	Metro	West	Working - as a paid employee	Yes	Yes, every year	Less than $30	No, no effect	No, no effect	Protect myself and others	#NULL!	#NULL!	#NULL!	#NULL!	#NULL!	#NULL!	#NULL!	#NULL!	#NULL!	#NULL!	#NULL!		Yes	Very effective	Yes, the full cost is paid	1.7246
1264	45-54	High school	White, Non-Hispanic	Male	$40,000 to $49,999	Never married	Metro	South	Not working - disabled	No	No, never	#NULL!	#NULL!	#NULL!	#NULL!	No	No	Yes	No	No	Yes	No	No	No	No	No		Yes	Somewhat effective	Yes, the full cost is paid	1.1586
1266	65-74	Some college	Black, Non-Hispanic	Female	$15,000 to $19,999	Widowed	Metro	South	Not working - retired	No	No, never	#NULL!	#NULL!	#NULL!	#NULL!	No	No	No	No	No	No	No	No	No	Yes	No	I got the shot once and I got the fu.	Yes	Don_t know	Yes, the full cost is paid	1.3389
1267	75+	Bachelor_s degree or higher	White, Non-Hispanic	Male	$175,000 or more	Married	Metro	Midwest	Not working - retired	Yes	No, never	#NULL!	#NULL!	#NULL!	#NULL!	No	No	Yes	No	No	No	No	No	No	No	No		Yes	It varies from season to season	Yes, the full cost is paid	0.6144
1268	18-24	Some college	White, Non-Hispanic	Male	$100,000 to $124,999	Never married	Metro	Midwest	Working - as a paid employee	Yes	No, never	#NULL!	#NULL!	#NULL!	#NULL!	No	No	No	No	Yes	No	No	No	No	No	No		Yes	Somewhat effective	Yes, the full cost is paid	1.4783
1269	25-34	Bachelor_s degree or higher	White, Non-Hispanic	Female	$100,000 to $124,999	Married	Non-Metro	Midwest	Working - as a paid employee	Yes	Yes, every year	$0	No, no effect	No, no effect	Protect myself and others	#NULL!	#NULL!	#NULL!	#NULL!	#NULL!	#NULL!	#NULL!	#NULL!	#NULL!	#NULL!	#NULL!		Yes	Somewhat effective	Don_t know	0.8922
1270	18-24	Some college	White, Non-Hispanic	Female	$75,000 to $84,999	Never married	Metro	Northeast	Not working - other	Yes	Yes, some years	$0	No, no effect	No, no effect	Protect myself	No	Yes	No	No	No	No	No	No	No	No	No		Yes	It varies from season to season	Don_t know	1.2807
1271	35-44	High school	White, Non-Hispanic	Male	$75,000 to $84,999	Never married	Metro	Northeast	Working - as a paid employee	Yes	No, never	#NULL!	#NULL!	#NULL!	#NULL!	No	No	No	No	No	No	No	Yes	No	No	No		No	It varies from season to season	#NULL!	1.0203
1272	65-74	Less than high school	White, Non-Hispanic	Male	$25,000 to $29,999	Married	Metro	Midwest	Not working - retired	Yes	Yes, some years	$0	Refused	No, no effect	Protect myself	No	No	No	No	No	No	No	Yes	No	No	No		Yes	Very effective	Yes, the full cost is paid	0.9593
1273	45-54	Bachelor_s degree or higher	White, Non-Hispanic	Male	$85,000 to $99,999	Divorced	Metro	West	Working - as a paid employee	Yes	No, never	#NULL!	#NULL!	#NULL!	#NULL!	No	No	Yes	No	No	No	No	No	No	No	No		Yes	It varies from season to season	Don_t know	0.6457
1274	55-64	Bachelor_s degree or higher	White, Non-Hispanic	Male	$100,000 to $124,999	Separated	Metro	South	Working - as a paid employee	Yes	Yes, every year	$0	No, no effect	No, no effect	Protect myself and others	#NULL!	#NULL!	#NULL!	#NULL!	#NULL!	#NULL!	#NULL!	#NULL!	#NULL!	#NULL!	#NULL!		Yes	Somewhat effective	Yes, the full cost is paid	0.7039
1275	35-44	Bachelor_s degree or higher	Black, Non-Hispanic	Male	$100,000 to $124,999	Married	Metro	South	Working - as a paid employee	Yes	Yes, some years	$0	Yes, more likely	No, no effect	Protect myself and others	No	No	Yes	No	No	No	No	Yes	No	No	No		Yes	Somewhat effective	Yes, the full cost is paid	1.2135
1276	35-44	Bachelor_s degree or higher	Other, Non-Hispanic	Male	$100,000 to $124,999	Married	Metro	South	Working - as a paid employee	Yes	Yes, some years	$0	Yes, more likely	No, less likely	Protect myself	No	No	No	No	No	No	Yes	Yes	No	No	No		Yes	Somewhat effective	Yes, the full cost is paid	1.538
1277	65-74	Bachelor_s degree or higher	White, Non-Hispanic	Male	$50,000 to $59,999	Married	Metro	West	Not working - retired	Yes	Yes, every year	$0	No, no effect	No, no effect	Refused	#NULL!	#NULL!	#NULL!	#NULL!	#NULL!	#NULL!	#NULL!	#NULL!	#NULL!	#NULL!	#NULL!		Yes	Don_t know	Yes, the full cost is paid	0.4987
1278	45-54	Bachelor_s degree or higher	White, Non-Hispanic	Male	$100,000 to $124,999	Married	Metro	Midwest	Working - as a paid employee	Yes	Yes, some years	Less than $30	No, less likely	No, no effect	Protect myself	No	Yes	No	No	Yes	No	No	No	No	No	No		Yes	Somewhat effective	Yes, but only part of the cost is paid	0.7008
1279	18-24	High school	Other, Non-Hispanic	Female	$50,000 to $59,999	Never married	Metro	Northeast	Working - as a paid employee	Yes	Yes, some years	$0	Yes, more likely	Yes, more likely	Protect myself and others	No	No	No	No	No	No	No	Yes	No	No	No		Yes	Somewhat effective	Yes, the full cost is paid	1.9889
1280	25-34	Bachelor_s degree or higher	White, Non-Hispanic	Male	$100,000 to $124,999	Never married	Metro	West	Working - as a paid employee	Yes	Yes, some years	Less than $30	Yes, more likely	Yes, more likely	Protect myself	No	No	No	No	No	No	No	Yes	No	No	No		Yes	Very effective	Yes, the full cost is paid	1.1449
1281	55-64	Some college	White, Non-Hispanic	Female	$20,000 to $24,999	Widowed	Non-Metro	South	Not working - disabled	Yes	Yes, every year	$0	Yes, more likely	No, no effect	Protect myself	#NULL!	#NULL!	#NULL!	#NULL!	#NULL!	#NULL!	#NULL!	#NULL!	#NULL!	#NULL!	#NULL!		Yes	Somewhat effective	Yes, the full cost is paid	0.6665
1282	45-54	Some college	White, Non-Hispanic	Female	$60,000 to $74,999	Married	Metro	West	Working - self-employed	Yes	No, never	#NULL!	#NULL!	#NULL!	#NULL!	No	Yes	No	No	No	No	No	No	No	No	No		Yes	It varies from season to season	Yes, the full cost is paid	0.7128
1283	25-34	Bachelor_s degree or higher	Hispanic	Male	$175,000 or more	Married	Non-Metro	South	Not working - other	No	No, never	#NULL!	#NULL!	#NULL!	#NULL!	No	No	No	No	No	No	No	No	Yes	No	No		No	Don_t know	#NULL!	1.6847
1284	25-34	Some college	White, Non-Hispanic	Male	$75,000 to $84,999	Married	Metro	Northeast	Working - as a paid employee	Yes	Yes, some years	$0	No, no effect	No, no effect	Protect myself and others	No	No	No	No	No	No	No	No	No	No	Yes		Yes	Don_t know	Don_t know	1.3859
1285	25-34	Bachelor_s degree or higher	White, Non-Hispanic	Female	$25,000 to $29,999	Married	Metro	South	Not working - other	Yes	Yes, every year	$0	No, no effect	No, no effect	Protect myself and others	#NULL!	#NULL!	#NULL!	#NULL!	#NULL!	#NULL!	#NULL!	#NULL!	#NULL!	#NULL!	#NULL!		Yes	Somewhat effective	Yes, but only part of the cost is paid	0.9219
1286	45-54	Some college	Hispanic	Female	$75,000 to $84,999	Divorced	Metro	West	Working - as a paid employee	Yes	No, never	#NULL!	#NULL!	#NULL!	#NULL!	No	Yes	No	No	No	No	No	No	No	No	No		Yes	It varies from season to season	Yes, the full cost is paid	1.0738
1287	35-44	High school	White, Non-Hispanic	Female	$15,000 to $19,999	Divorced	Metro	South	Working - self-employed	No	Yes, every year	$0	Yes, more likely	Yes, more likely	Protect myself and others	#NULL!	#NULL!	#NULL!	#NULL!	#NULL!	#NULL!	#NULL!	#NULL!	#NULL!	#NULL!	#NULL!		Yes	Very effective	Don_t know	1.4372
1288	75+	Some college	Hispanic	Female	$75,000 to $84,999	Married	Metro	West	Not working - retired	Yes	Yes, some years	Don_t know	No, no effect	No, no effect	Protect myself and others	No	No	No	No	No	No	No	No	No	No	Yes		Yes	Don_t know	Yes, the full cost is paid	1.0127
1289	65-74	Less than high school	Hispanic	Female	Less than $5,000	Married	Metro	West	Not working - retired	No	Yes, every year	$0	Yes, more likely	Yes, more likely	Refused	#NULL!	#NULL!	#NULL!	#NULL!	#NULL!	#NULL!	#NULL!	#NULL!	#NULL!	#NULL!	#NULL!		Yes	It varies from season to season	Yes, the full cost is paid	1.6967
1290	55-64	Bachelor_s degree or higher	White, Non-Hispanic	Female	$100,000 to $124,999	Divorced	Metro	Midwest	Not working - retired	Yes	Yes, some years	Less than $30	No, no effect	No, no effect	Protect myself and others	No	Yes	Yes	No	No	No	Yes	Yes	No	No	No		Yes	It varies from season to season	Yes, but only part of the cost is paid	0.7383
1291	35-44	High school	White, Non-Hispanic	Male	$7,500 to $9,999	Never married	Metro	South	Not working - looking for work	No	No, never	#NULL!	#NULL!	#NULL!	#NULL!	No	No	No	No	Yes	No	Yes	No	No	No	No		No	Don_t know	#NULL!	1.2977
1292	18-24	High school	Hispanic	Male	$15,000 to $19,999	Never married	Metro	West	Not working - looking for work	Yes	Yes, some years	$0	Yes, more likely	Yes, more likely	Protect myself	Yes	Yes	No	Yes	No	No	No	Yes	No	No	No		Yes	Somewhat effective	Yes, the full cost is paid	1.5188
1293	75+	High school	White, Non-Hispanic	Female	$50,000 to $59,999	Married	Metro	Northeast	Not working - retired	Yes	Yes, every year	$0	Yes, more likely	Yes, more likely	Protect myself and others	#NULL!	#NULL!	#NULL!	#NULL!	#NULL!	#NULL!	#NULL!	#NULL!	#NULL!	#NULL!	#NULL!		Yes	Very effective	Yes, the full cost is paid	0.702
1294	55-64	Some college	White, Non-Hispanic	Female	$125,000 to $149,999	Married	Metro	Midwest	Not working - other	Yes	Yes, some years	$0	No, no effect	No, no effect	Protect myself and others	No	No	Yes	No	No	No	No	No	No	No	No		Yes	It varies from season to season	Yes, the full cost is paid	0.8783
1295	65-74	Less than high school	White, Non-Hispanic	Male	Less than $5,000	Never married	Metro	West	Not working - other	No	Yes, every year	$0	No, less likely	No, less likely	Protect myself	#NULL!	#NULL!	#NULL!	#NULL!	#NULL!	#NULL!	#NULL!	#NULL!	#NULL!	#NULL!	#NULL!		Yes	Somewhat effective	Yes, the full cost is paid	1.1285
1296	35-44	Bachelor_s degree or higher	White, Non-Hispanic	Male	$100,000 to $124,999	Living with partner	Metro	Northeast	Working - self-employed	Yes	No, never	#NULL!	#NULL!	#NULL!	#NULL!	No	Yes	Yes	No	Yes	No	Yes	No	No	No	No		Yes	Somewhat effective	Don_t know	0.8356
1297	75+	High school	Black, Non-Hispanic	Male	$25,000 to $29,999	Married	Metro	South	Not working - retired	No	No, never	#NULL!	#NULL!	#NULL!	#NULL!	No	No	No	No	No	No	Yes	No	No	No	No		Yes	It varies from season to season	Yes, but only part of the cost is paid	1.377
1298	35-44	Bachelor_s degree or higher	Other, Non-Hispanic	Male	$100,000 to $124,999	Married	Metro	West	Not working - other	Yes	No, never	#NULL!	#NULL!	#NULL!	#NULL!	No	No	No	No	No	No	No	No	Yes	No	No		No	Don_t know	#NULL!	1.4108
1299	65-74	High school	2+ Races, Non-Hispanic	Female	$25,000 to $29,999	Married	Metro	West	Not working - retired	Yes	No, never	#NULL!	#NULL!	#NULL!	#NULL!	No	No	No	Yes	No	No	No	No	No	No	No		Yes	Very effective	Yes, the full cost is paid	0.2705
1300	75+	Bachelor_s degree or higher	White, Non-Hispanic	Female	$50,000 to $59,999	Married	Non-Metro	Midwest	Not working - retired	Yes	Yes, every year	$0	No, no effect	Yes, more likely	Protect myself	#NULL!	#NULL!	#NULL!	#NULL!	#NULL!	#NULL!	#NULL!	#NULL!	#NULL!	#NULL!	#NULL!		Yes	Somewhat effective	Yes, the full cost is paid	0.5542
1302	45-54	Some college	White, Non-Hispanic	Male	$7,500 to $9,999	Never married	Metro	Midwest	Not working - disabled	Yes	Yes, some years	$0	No, no effect	No, no effect	Protect myself and others	No	No	No	No	No	No	No	Yes	No	No	No		Yes	Somewhat effective	Yes, the full cost is paid	0.6827
1303	35-44	Some college	Hispanic	Male	$60,000 to $74,999	Never married	Metro	South	Working - self-employed	Yes	No, never	#NULL!	#NULL!	#NULL!	#NULL!	No	No	No	No	No	No	No	Yes	No	No	No		No	Don_t know	#NULL!	1.2447
1304	55-64	High school	Hispanic	Female	$85,000 to $99,999	Divorced	Metro	South	Working - as a paid employee	No	Yes, every year	$0	Yes, more likely	Yes, more likely	Protect myself and others	#NULL!	#NULL!	#NULL!	#NULL!	#NULL!	#NULL!	#NULL!	#NULL!	#NULL!	#NULL!	#NULL!		Yes	It varies from season to season	Yes, the full cost is paid	1.7417
1305	65-74	High school	White, Non-Hispanic	Female	$20,000 to $24,999	Widowed	Metro	South	Not working - retired	Yes	Yes, every year	$0	No, no effect	No, no effect	Protect myself and others	#NULL!	#NULL!	#NULL!	#NULL!	#NULL!	#NULL!	#NULL!	#NULL!	#NULL!	#NULL!	#NULL!		Yes	Very effective	Yes, the full cost is paid	0.6992
1306	35-44	High school	White, Non-Hispanic	Male	$35,000 to $39,999	Widowed	Non-Metro	Midwest	Not working - looking for work	No	No, never	#NULL!	#NULL!	#NULL!	#NULL!	Yes	No	No	No	No	No	No	No	No	No	No		Yes	Very effective	Yes, the full cost is paid	1.3258
1307	65-74	Bachelor_s degree or higher	Black, Non-Hispanic	Female	$10,000 to $12,499	Divorced	Metro	South	Not working - retired	No	No, never	#NULL!	#NULL!	#NULL!	#NULL!	No	No	No	No	Yes	No	No	No	No	No	No		Yes	It varies from season to season	Yes, the full cost is paid	1.1254
1308	65-74	High school	White, Non-Hispanic	Male	$40,000 to $49,999	Never married	Metro	West	Not working - retired	Yes	Yes, every year	$0	No, no effect	No, no effect	Protect myself and others	#NULL!	#NULL!	#NULL!	#NULL!	#NULL!	#NULL!	#NULL!	#NULL!	#NULL!	#NULL!	#NULL!		Yes	Somewhat effective	Yes, the full cost is paid	0.6428
1309	65-74	Bachelor_s degree or higher	White, Non-Hispanic	Female	$150,000 to $174,999	Married	Metro	South	Not working - retired	Yes	Yes, every year	$0	No, no effect	No, no effect	Protect myself	#NULL!	#NULL!	#NULL!	#NULL!	#NULL!	#NULL!	#NULL!	#NULL!	#NULL!	#NULL!	#NULL!		Yes	Somewhat effective	Yes, the full cost is paid	0.6994
1310	35-44	Some college	Black, Non-Hispanic	Female	$35,000 to $39,999	Never married	Metro	South	Working - as a paid employee	No	No, never	#NULL!	#NULL!	#NULL!	#NULL!	No	No	No	No	No	No	Yes	No	No	No	No		Yes	Somewhat effective	Yes, the full cost is paid	2.1554
1311	45-54	Some college	White, Non-Hispanic	Male	$50,000 to $59,999	Married	Non-Metro	Midwest	Working - self-employed	Yes	No, never	#NULL!	#NULL!	#NULL!	#NULL!	No	No	Yes	No	No	No	No	No	No	No	No		Yes	Somewhat effective	Yes, the full cost is paid	0.6637
1312	25-34	High school	White, Non-Hispanic	Female	$60,000 to $74,999	Married	Metro	Midwest	Working - as a paid employee	Yes	Yes, some years	$0	Yes, more likely	No, less likely	Protect myself and others	No	Yes	No	No	No	No	No	No	No	Yes	No	I still get sick	Yes	It varies from season to season	Yes, the full cost is paid	1.2349
1313	18-24	Some college	White, Non-Hispanic	Female	$15,000 to $19,999	Married	Metro	South	Working - as a paid employee	Yes	No, never	#NULL!	#NULL!	#NULL!	#NULL!	No	No	No	No	No	No	No	No	No	Yes	No	I try to stay natural	Yes	Somewhat effective	Don_t know	1.1236
1314	75+	High school	Hispanic	Male	$20,000 to $24,999	Widowed	Metro	South	Not working - retired	Yes	Yes, every year	$0	Yes, more likely	No, less likely	Protect myself and others	#NULL!	#NULL!	#NULL!	#NULL!	#NULL!	#NULL!	#NULL!	#NULL!	#NULL!	#NULL!	#NULL!		Yes	Very effective	Yes, the full cost is paid	0.8187
1315	65-74	Bachelor_s degree or higher	Black, Non-Hispanic	Female	$100,000 to $124,999	Married	Metro	Northeast	Not working - retired	Yes	Yes, every year	$0	No, no effect	No, no effect	Protect myself and others	#NULL!	#NULL!	#NULL!	#NULL!	#NULL!	#NULL!	#NULL!	#NULL!	#NULL!	#NULL!	#NULL!		Yes	Somewhat effective	Yes, the full cost is paid	0.8848
1316	35-44	Bachelor_s degree or higher	White, Non-Hispanic	Female	$100,000 to $124,999	Married	Metro	South	Working - as a paid employee	Yes	No, never	#NULL!	#NULL!	#NULL!	#NULL!	No	No	Yes	No	No	No	No	Yes	No	No	No		Yes	It varies from season to season	Yes, the full cost is paid	0.9915
1317	65-74	High school	White, Non-Hispanic	Male	$85,000 to $99,999	Married	Metro	Northeast	Not working - retired	Yes	Yes, some years	Less than $30	No, no effect	No, no effect	Protect myself and others	No	Yes	No	No	No	No	No	Yes	No	No	No		Yes	Somewhat effective	Don_t know	0.7034
1318	35-44	Bachelor_s degree or higher	Other, Non-Hispanic	Male	$175,000 or more	Married	Metro	South	Working - as a paid employee	Yes	Yes, every year	$0	No, no effect	No, no effect	Protect myself and others	#NULL!	#NULL!	#NULL!	#NULL!	#NULL!	#NULL!	#NULL!	#NULL!	#NULL!	#NULL!	#NULL!		Yes	Very effective	Yes, but only part of the cost is paid	1.538
1319	55-64	High school	White, Non-Hispanic	Female	$15,000 to $19,999	Married	Metro	Midwest	Working - as a paid employee	No	Yes, every year	Less than $30	No, no effect	Yes, more likely	Protect myself and others	#NULL!	#NULL!	#NULL!	#NULL!	#NULL!	#NULL!	#NULL!	#NULL!	#NULL!	#NULL!	#NULL!		Yes	Very effective	Don_t know	1.0092
1320	55-64	Less than high school	Hispanic	Female	$40,000 to $49,999	Divorced	Metro	West	Not working - looking for work	No	No, never	#NULL!	#NULL!	#NULL!	#NULL!	No	No	No	No	Yes	No	Yes	No	No	No	No		Yes	Not effective	Don_t know	2.0429
1321	35-44	Some college	White, Non-Hispanic	Female	$75,000 to $84,999	Married	Non-Metro	Northeast	Working - as a paid employee	Yes	Yes, every year	$30 to $60	No, no effect	No, no effect	Protect myself and others	#NULL!	#NULL!	#NULL!	#NULL!	#NULL!	#NULL!	#NULL!	#NULL!	#NULL!	#NULL!	#NULL!		Yes	Somewhat effective	Yes, but only part of the cost is paid	0.9632
1322	55-64	Bachelor_s degree or higher	White, Non-Hispanic	Female	$150,000 to $174,999	Married	Metro	Midwest	Working - as a paid employee	Yes	Yes, every year	$0	No, no effect	No, no effect	Protect myself and others	#NULL!	#NULL!	#NULL!	#NULL!	#NULL!	#NULL!	#NULL!	#NULL!	#NULL!	#NULL!	#NULL!		Yes	Very effective	Yes, the full cost is paid	0.7383
1323	25-34	High school	White, Non-Hispanic	Female	$35,000 to $39,999	Married	Non-Metro	Northeast	Not working - other	No	Yes, every year	Less than $30	Yes, more likely	No, less likely	Protect myself	#NULL!	#NULL!	#NULL!	#NULL!	#NULL!	#NULL!	#NULL!	#NULL!	#NULL!	#NULL!	#NULL!		Yes	Very effective	Yes, the full cost is paid	1.3325
1324	55-64	High school	White, Non-Hispanic	Female	$50,000 to $59,999	Married	Non-Metro	Northeast	Working - self-employed	No	Yes, every year	$0	No, less likely	Yes, more likely	Protect myself	#NULL!	#NULL!	#NULL!	#NULL!	#NULL!	#NULL!	#NULL!	#NULL!	#NULL!	#NULL!	#NULL!		Yes	Very effective	Yes, the full cost is paid	0.8903
1325	55-64	Bachelor_s degree or higher	White, Non-Hispanic	Male	$100,000 to $124,999	Married	Metro	South	Working - as a paid employee	Yes	Yes, every year	Less than $30	No, no effect	No, no effect	Protect myself and others	#NULL!	#NULL!	#NULL!	#NULL!	#NULL!	#NULL!	#NULL!	#NULL!	#NULL!	#NULL!	#NULL!		Yes	Somewhat effective	Yes, but only part of the cost is paid	0.6172
1326	55-64	Bachelor_s degree or higher	White, Non-Hispanic	Female	$100,000 to $124,999	Married	Metro	South	Working - as a paid employee	Yes	No, never	#NULL!	#NULL!	#NULL!	#NULL!	No	Yes	Yes	No	No	No	No	No	No	No	No		Yes	Somewhat effective	Yes, the full cost is paid	0.6994
1327	55-64	Some college	White, Non-Hispanic	Female	$100,000 to $124,999	Married	Non-Metro	Midwest	Working - as a paid employee	Yes	Yes, every year	$0	No, no effect	No, no effect	Protect myself and others	#NULL!	#NULL!	#NULL!	#NULL!	#NULL!	#NULL!	#NULL!	#NULL!	#NULL!	#NULL!	#NULL!		Yes	Somewhat effective	Yes, the full cost is paid	0.7938
1328	55-64	Some college	Black, Non-Hispanic	Male	$50,000 to $59,999	Never married	Metro	Midwest	Working - as a paid employee	No	Yes, every year	$0	Yes, more likely	Yes, more likely	Protect myself	#NULL!	#NULL!	#NULL!	#NULL!	#NULL!	#NULL!	#NULL!	#NULL!	#NULL!	#NULL!	#NULL!		Yes	Somewhat effective	Yes, the full cost is paid	1.4431
1330	35-44	High school	White, Non-Hispanic	Female	$40,000 to $49,999	Never married	Metro	South	Working - self-employed	Yes	No, never	#NULL!	#NULL!	#NULL!	#NULL!	No	No	Yes	No	No	No	Yes	No	No	No	No		Yes	Somewhat effective	Don_t know	1.1257
1331	55-64	Less than high school	Hispanic	Male	$10,000 to $12,499	Married	Metro	South	Working - as a paid employee	No	Yes, every year	$0	No, less likely	Yes, more likely	Protect myself	#NULL!	#NULL!	#NULL!	#NULL!	#NULL!	#NULL!	#NULL!	#NULL!	#NULL!	#NULL!	#NULL!		Yes	Somewhat effective	Yes, the full cost is paid	1.8617
1332	45-54	Less than high school	Hispanic	Male	$75,000 to $84,999	Married	Metro	South	Working - self-employed	Yes	No, never	#NULL!	#NULL!	#NULL!	#NULL!	Yes	No	No	No	Yes	No	No	No	No	No	No		No	Don_t know	#NULL!	1.5683
1333	65-74	Bachelor_s degree or higher	Other, Non-Hispanic	Female	$100,000 to $124,999	Married	Metro	Northeast	Not working - retired	Yes	Yes, every year	$0	Yes, more likely	Yes, more likely	Protect myself and others	#NULL!	#NULL!	#NULL!	#NULL!	#NULL!	#NULL!	#NULL!	#NULL!	#NULL!	#NULL!	#NULL!		Yes	Very effective	Yes, the full cost is paid	1.1214
1334	65-74	Bachelor_s degree or higher	White, Non-Hispanic	Male	$175,000 or more	Married	Metro	Midwest	Not working - retired	Yes	Yes, every year	$0	No, no effect	No, no effect	Protect myself and others	#NULL!	#NULL!	#NULL!	#NULL!	#NULL!	#NULL!	#NULL!	#NULL!	#NULL!	#NULL!	#NULL!		Yes	Somewhat effective	Yes, the full cost is paid	0.6144
1335	65-74	High school	White, Non-Hispanic	Male	$40,000 to $49,999	Married	Metro	South	Not working - retired	Yes	No, never	#NULL!	#NULL!	#NULL!	#NULL!	No	Yes	No	No	Yes	No	No	No	No	No	No		Yes	It varies from season to season	Yes, the full cost is paid	0.7007
1336	75+	High school	White, Non-Hispanic	Female	$30,000 to $34,999	Widowed	Metro	Midwest	Not working - retired	Yes	Yes, every year	$0	No, no effect	No, no effect	Protect myself and others	#NULL!	#NULL!	#NULL!	#NULL!	#NULL!	#NULL!	#NULL!	#NULL!	#NULL!	#NULL!	#NULL!		Yes	It varies from season to season	Yes, the full cost is paid	0.7904
1337	65-74	High school	White, Non-Hispanic	Male	$125,000 to $149,999	Married	Metro	Midwest	Not working - retired	Yes	Yes, some years	$0	No, no effect	Yes, more likely	Protect myself and others	No	No	No	No	No	No	No	Yes	No	No	No		Yes	Somewhat effective	Yes, the full cost is paid	0.7502
1338	45-54	Less than high school	White, Non-Hispanic	Male	Less than $5,000	Never married	Non-Metro	South	Working - self-employed	No	No, never	#NULL!	#NULL!	#NULL!	#NULL!	Yes	Yes	Yes	Yes	Yes	Yes	Yes	Yes	Yes	Yes	No	who ever wrote this survey must be on drugs	No	Not effective	#NULL!	1.3726
1339	18-24	High school	White, Non-Hispanic	Male	$50,000 to $59,999	Never married	Non-Metro	West	Not working - other	Yes	No, never	#NULL!	#NULL!	#NULL!	#NULL!	No	No	Yes	No	No	No	No	No	No	No	No		Yes	Very effective	Don_t know	2.1061
1340	65-74	High school	White, Non-Hispanic	Male	$75,000 to $84,999	Married	Metro	Midwest	Not working - retired	Yes	Yes, every year	$0	No, no effect	No, no effect	Protect myself and others	#NULL!	#NULL!	#NULL!	#NULL!	#NULL!	#NULL!	#NULL!	#NULL!	#NULL!	#NULL!	#NULL!		Yes	Very effective	Yes, the full cost is paid	0.7502
1341	18-24	Some college	White, Non-Hispanic	Female	$75,000 to $84,999	Living with partner	Metro	South	Working - as a paid employee	Yes	Yes, some years	$0	No, no effect	No, no effect	Protect myself and others	No	No	No	No	No	No	Yes	Yes	No	No	No		Yes	Somewhat effective	Don_t know	1.3722
1342	75+	High school	White, Non-Hispanic	Female	$85,000 to $99,999	Married	Non-Metro	Midwest	Not working - retired	Yes	Yes, every year	$0	Yes, more likely	No, no effect	Protect myself and others	#NULL!	#NULL!	#NULL!	#NULL!	#NULL!	#NULL!	#NULL!	#NULL!	#NULL!	#NULL!	#NULL!		Yes	Don_t know	Yes, the full cost is paid	0.7683
1343	35-44	Some college	2+ Races, Non-Hispanic	Male	$60,000 to $74,999	Married	Metro	South	Working - as a paid employee	Yes	No, never	#NULL!	#NULL!	#NULL!	#NULL!	No	No	No	No	Yes	No	Yes	No	No	No	No		Yes	Somewhat effective	Yes, the full cost is paid	0.3325
1344	35-44	Less than high school	Other, Non-Hispanic	Male	$75,000 to $84,999	Married	Non-Metro	South	Working - self-employed	Yes	No, never	#NULL!	#NULL!	#NULL!	#NULL!	No	No	No	No	No	No	No	Yes	No	No	No		No	It varies from season to season	#NULL!	2.5264
1345	18-24	Less than high school	Hispanic	Female	$50,000 to $59,999	Never married	Metro	West	Working - as a paid employee	Yes	No, never	#NULL!	#NULL!	#NULL!	#NULL!	No	Yes	No	No	No	No	Yes	No	No	No	No		Yes	Somewhat effective	Yes, the full cost is paid	2.0762
1346	35-44	Bachelor_s degree or higher	Other, Non-Hispanic	Female	$175,000 or more	Married	Metro	South	Working - as a paid employee	Yes	Yes, every year	$0	No, no effect	No, no effect	Protect myself and others	#NULL!	#NULL!	#NULL!	#NULL!	#NULL!	#NULL!	#NULL!	#NULL!	#NULL!	#NULL!	#NULL!		Yes	It varies from season to season	Yes, the full cost is paid	1.7034
1347	55-64	Some college	White, Non-Hispanic	Female	Less than $5,000	Married	Non-Metro	Northeast	Not working - disabled	Yes	No, never	#NULL!	#NULL!	#NULL!	#NULL!	Yes	Yes	Yes	No	Yes	No	No	No	Yes	No	No		No	It varies from season to season	#NULL!	0.5563
1348	35-44	Bachelor_s degree or higher	White, Non-Hispanic	Male	$175,000 or more	Married	Metro	South	Working - as a paid employee	Yes	Yes, every year	$0	No, no effect	No, no effect	Protect myself	#NULL!	#NULL!	#NULL!	#NULL!	#NULL!	#NULL!	#NULL!	#NULL!	#NULL!	#NULL!	#NULL!		Yes	Very effective	Yes, the full cost is paid	0.8953
1349	55-64	Bachelor_s degree or higher	White, Non-Hispanic	Female	$150,000 to $174,999	Married	Metro	Northeast	Working - as a paid employee	Yes	No, never	#NULL!	#NULL!	#NULL!	#NULL!	No	No	Yes	No	No	No	No	Yes	No	No	No		Yes	Somewhat effective	Yes, the full cost is paid	0.6921
1350	55-64	High school	White, Non-Hispanic	Female	$30,000 to $34,999	Widowed	Metro	South	Not working - retired	No	Yes, every year	$0	No, no effect	No, no effect	Protect myself and others	#NULL!	#NULL!	#NULL!	#NULL!	#NULL!	#NULL!	#NULL!	#NULL!	#NULL!	#NULL!	#NULL!		Yes	It varies from season to season	Yes, the full cost is paid	1.1511
1351	45-54	Some college	White, Non-Hispanic	Male	$35,000 to $39,999	Divorced	Metro	West	Working - as a paid employee	Yes	Yes, some years	Don_t know	No, no effect	No, no effect	Protect others	No	No	Yes	No	No	No	No	No	No	No	No		No	Somewhat effective	#NULL!	0.7143
1352	45-54	High school	White, Non-Hispanic	Female	$85,000 to $99,999	Divorced	Metro	Midwest	Working - as a paid employee	No	No, never	#NULL!	#NULL!	#NULL!	#NULL!	No	No	Yes	No	No	No	No	No	No	No	No		Yes	Somewhat effective	Yes, the full cost is paid	1.3069
1353	45-54	Some college	Hispanic	Male	$60,000 to $74,999	Married	Metro	West	Working - as a paid employee	Yes	Yes, every year	$0	Yes, more likely	Yes, more likely	Protect myself and others	#NULL!	#NULL!	#NULL!	#NULL!	#NULL!	#NULL!	#NULL!	#NULL!	#NULL!	#NULL!	#NULL!		Yes	Somewhat effective	Yes, the full cost is paid	0.8978
1354	35-44	Bachelor_s degree or higher	White, Non-Hispanic	Female	$85,000 to $99,999	Married	Metro	South	Working - as a paid employee	Yes	No, never	#NULL!	#NULL!	#NULL!	#NULL!	No	No	No	No	No	No	No	No	No	Yes	No	I_ve gotten influenza after getting the vaccine.	Yes	Somewhat effective	Yes, the full cost is paid	0.9915
1355	35-44	High school	White, Non-Hispanic	Male	$125,000 to $149,999	Married	Non-Metro	Midwest	Working - as a paid employee	Yes	Yes, every year	$0	No, no effect	No, no effect	Protect myself and others	#NULL!	#NULL!	#NULL!	#NULL!	#NULL!	#NULL!	#NULL!	#NULL!	#NULL!	#NULL!	#NULL!		Yes	Somewhat effective	Don_t know	0.9836
1357	65-74	High school	White, Non-Hispanic	Female	$25,000 to $29,999	Never married	Metro	West	Not working - other	No	No, never	#NULL!	#NULL!	#NULL!	#NULL!	No	Yes	Yes	No	No	No	No	Yes	No	No	No		Yes	Don_t know	Don_t know	1.0559
[truncated: 837 more rows]
